# Supplementary material for: HSPCs display within-family homogeneity in differentiation and proliferation despite population heterogeneity
Source: eLife. 2021 May 18;10:e60624. doi: 10.7554/eLife.60624 (PMC8175087; doi:10.7554/eLife.60624)
Supplement: Figure 1—source data 1. [file elife-60624-fig1-data1.xlsx]

## Sheet: Figure 1
		Cell Surface Marker
		SLAM	Flt3	Sca-1	c-Kit	FCγRIII/II
		(CD150)	(CD135)	(Ly6A/E)	(CD117)	(CD16/32)
	SLAM-HSC	+	-	+	+	x
	ST-HSC	-	-	+	+	x
	MPP	-	+	+	+	x
	SLAM+Flt3+	+	+	+	+	x
Cell type	CMP/GMP	x	x	-	+	+
	MP	x	x	-	-	+
	MEP	-	x	-	+	-
	PreMegE	+	x	-	+	-
	c-Kit-	x	x	-	-	-
