# Supplementary material for: HSPCs display within-family homogeneity in differentiation and proliferation despite population heterogeneity
Source: eLife. 2021 May 18;10:e60624. doi: 10.7554/eLife.60624 (PMC8175087; doi:10.7554/eLife.60624)
Supplement: Figure 2—source data 1. [file elife-60624-fig2-data1.xlsx]

## Sheet: # Families
	Progenitor
	SLAM-HSC		ST-HSC		MPP
Condition (±IL-3/IL-6)	-	+	-	+	-	+
Total clones (Figure 2D,E and 4B,D)	172	186	175	166	115	125
Clones in generation 0 (Figure 2F)	74	68	72	71	59	58
Clones with 2 cells in generation 1 (Figure 2G)	25	31	18	24	20	15
Clones in recovered at 48 h time (Figure 2H)	73	81	77	63	48	43
Cells in generation 1 (Figure 2-figure supplement 2)	76	90	60	65	63	46
