# Supplementary material for: HSPCs display within-family homogeneity in differentiation and proliferation despite population heterogeneity
Source: eLife. 2021 May 18;10:e60624. doi: 10.7554/eLife.60624 (PMC8175087; doi:10.7554/eLife.60624)
Supplement: Figure 2—source data 2. [file elife-60624-fig2-data2.xlsx]

## Sheet: Blad1
		Test for independence from condition
	Clonal data	SLAM-HSC	ST-HSC	MPP
Clonal features	Population differentiation (Figure 2D)	.158	<10-5	<10-5
	Clonal progression (Figure 2E)	.035	.007	.019
	Generation 0 differentiation (Figure 2F)	.355	.106	.002
	Division pattern in 1st division (Figure 2G)	.778	.383	.134
