# Supplementary material for: HSPCs display within-family homogeneity in differentiation and proliferation despite population heterogeneity
Source: eLife. 2021 May 18;10:e60624. doi: 10.7554/eLife.60624 (PMC8175087; doi:10.7554/eLife.60624)
Supplement: Figure 3—source data 1. [file elife-60624-fig3-data1.xlsx]

## Sheet: Sheet1
		Generation
		0	1	2	3	4+
	SLAM-HSC	142	166	151	161	29
Progenitor	ST-HSC	143	125	183	95	43
	MPP	117	109	57	37	34
