# Supplementary material for: HSPCs display within-family homogeneity in differentiation and proliferation despite population heterogeneity
Source: eLife. 2021 May 18;10:e60624. doi: 10.7554/eLife.60624 (PMC8175087; doi:10.7554/eLife.60624)
Supplement: Figure 4—source data 1. [file elife-60624-fig4-data1.xlsx]

## Sheet: Sheet1
	Ancestral marker expression	c-Kit	Sca-1	CD48
SLAM-HSC	- IL-3/IL-6, 24h	0.1223	0.00496	0.000024
	+ IL-3/IL-6, 24h	0.6812	0.000216	0.000448
	- IL-3/IL-6, 48h	0.001088	0.000768	0.5577
	+ IL-3/IL-6, 48h	0.000024	0.000016	0.00032
