# Supplementary material for: HSPCs display within-family homogeneity in differentiation and proliferation despite population heterogeneity
Source: eLife. 2021 May 18;10:e60624. doi: 10.7554/eLife.60624 (PMC8175087; doi:10.7554/eLife.60624)
Supplement: Figure 4—source data 2. [file elife-60624-fig4-data2.xlsx]

## Sheet: Sheet1
		Progenitor
		SLAM-HSC			ST-HSC			MPP
		r	95%CI	p	r	95%CI	p	r	95%CI	p
Marker	c-Kit	0.007	-0.073 - 0.086	0.864	0.207	0.126 - 0.285	<0.0001	0.333	0.236 -	<0.0001
									0.425
	SLAM	0.568	0.512 - 0.619	<0.0001	0.205	0.125 - 0.284	<0.0001	0.126	0.020 -	0.0164
									0.229
	SCA1	0.603	0.550 - 0.651	<0.0001	0.519	0.456 - 0.577	<0.0001	0.567	0.490 -	<0.0001
									0.635
	Flt3	0.110	0.031 - 0.188	0.0049	0.330	0.254 - 0.402	<0.0001	0.279	0.178 -	<0.0001
									0.374
	CD48	0.650	0.592 - 0.701	<0.0001	0.473	0.390 - 0.548	<0.0001	0.305	0.188 -	<0.0001
									0.413
	FSC	0.061	-0.019 - 0.139	0.1219	0.063	-0.020 - 0.145	0.1269	0.074	-0.0324 - 0.179	0.1603
	SSC	0.003	-0.076 - 0.082	0.9389	-0.002	-0.085 - 0.081	0.9555	-0.105	-0.209 - 0.001	0.0454
