# Supplementary material for: HSPCs display within-family homogeneity in differentiation and proliferation despite population heterogeneity
Source: eLife. 2021 May 18;10:e60624. doi: 10.7554/eLife.60624 (PMC8175087; doi:10.7554/eLife.60624)
Supplement: Figure 4—source data 3. [file elife-60624-fig4-data3.xlsx]

## Sheet: Sheet1
		Condition and cell type
		- IL-3/IL-6		+ IL-3/IL-6
Ancestor (time)	Ancestral marker	SLAM-HSC	PreMegE	SLAM-HSC	PreMegE
	CD48	0.07218	0.2305	0.000032	0.00228
SLAM-HSC (24h)	Sca-1	0.000048	0.00052	0.000048	0.00004
	c-Kit	0.05708	0.10204	0.11032	0.3078
		SLAM-HSC	PreMegE	SLAM-HSC	PreMegE
	CD48	0.3711	0.3722	0.0153	0.04186
SLAM-HSC (48h)	Sca-1	0.000048	0.0094	0.000048	0.00016
	c-Kit	0.03054	0.009696	0.004864	0.02358
		SLAM-HSC		SLAM-HSC
ST-HSC (24h)	CD48	0.8085		0.000304
	Sca-1	0.9432		0.01861
		SLAM-HSC	GMP/CMP	SLAM-HSC	GMP/CMP
ST-HSC (48h)	CD48	0.1047	0.000024	0.0255	0.000096
	Sca-1	0.13556	0.000144	0.03586	0.004176
		GMP	MEP	GMP
	Sca-1	0.000048	0.6814	0.005376
MPP (48h)	c-Kit	0.09996	0.04688	0.013648
	Flt3	0.04772	0.9356	0.8337
