# Supplementary material for: HSPCs display within-family homogeneity in differentiation and proliferation despite population heterogeneity
Source: eLife. 2021 May 18;10:e60624. doi: 10.7554/eLife.60624 (PMC8175087; doi:10.7554/eLife.60624)
Supplement: Figure 4—source data 4. [file elife-60624-fig4-data4.xlsx]

## Sheet: Sheet1
Sorted Celltype	Resulting Celltype after culture	Expression on ancestor leading to increased output	Timepoint	Condition	Biological significance
SLAM-HSC	SLAM-HSC	High CD48	24h & 48h	+ IL3/6	Leads to more self-renewal
		Low Sca-1	24h & 48h	+ & - IL3/6
		Low c-Kit	48h	+ & - IL3/6
	PreMegE	Low CD48	24h & 48h	+ IL3/6	Leads to more differentiation into E/Mk lineage
		High Sca-1	24h & 48h	+ & - IL3/6
		High c-Kit	48h	+ & - IL3/6
ST-HSC	SLAM-HSC	High CD48	24h & 48h	+ IL3/6	Leads to more self-renewal
		Low Sca-1	24h & 48h	+ IL3/6
	GMP	Low CD48	48h	+ IL3/6	Leads to more differentiation into myeloid lineage
		High Sca-1	48h	+ & - IL3/6
MPP	GMP	High Sca-1	48h	+ & - IL3/6	Leads to more differentiation into myeloid lineage
		Low c-Kit	48h	0
		High Flt3	48h	IL3/6
	CMP/MEP	Low c-Kit	48h	- IL3/6	Leads to more differentiation into E/Mk lineage
