# Supplementary material for: HSPCs display within-family homogeneity in differentiation and proliferation despite population heterogeneity
Source: eLife. 2021 May 18;10:e60624. doi: 10.7554/eLife.60624 (PMC8175087; doi:10.7554/eLife.60624)
Supplement: Source data 1. [file elife-60624-data1.xlsx]

## Sheet: Source data table
Cell_ID	filename	well	culture_condition	color	ancestor_celltype	cell_type_analysis	Experiment	Experiment_num	Timepoint	Family	FSC.H	SSC.H	CFSE	SLAM	Flt3	CD16.32	CTV	CD127	CD48	SCA.1	ckit	TIME	sort_FSC.A	sort_SSC.A	sort_CFSE	sort_CD48	sort_ckit	sort_CTV	sort_SLAM	sort_SCA.1	sort_Flt3	umapx	umapy	n_resulting_celltypes_in_family	n_cells_in_family	maxgen_in_family	Mingen_in_family	Deltagen	Celltypes_present_in_family
1	export_A1 MPP SC2_VC0.csv	A1	SC2	VC	MPP	MPP	TT22	22	24	1	88529.6	48103.8	13934.8	78.2363	1489.25	399.277	35305.7	9.27834	472.787	654.07	309.09	118.887	154808	70149.3	79702.6	4961.24	5060.43	26257.8	1318.25	8215.54	2935.83	-2.89796	-2.19823	1	1	0	0	0	MPP,
2	export_A1 MPP SC2_Vi1.csv.1	A1	SC2	Vi	MPP	HSC_ST	TT22	22	24	2	122752	55550.7	2.21733	49.1224	344.709	267.883	32817.7	98.9926	762.173	217.203	825.015	21.6289	203234	111934	-51.17	8647.29	7812.38	56825.1	329.128	1743.79	859.494	-2.0688	-0.0173384	1	2	0	0	0	ST-HSC,ST-HSC,
3	export_A1 MPP SC2_Vi1.csv.2	A1	SC2	Vi	MPP	HSC_ST	TT22	22	24	2	97025.4	66824.3	1.89312	34.0661	394.62	209.552	32725.2	94.2617	598.639	169.96	507.216	101.694	203234	111934	-51.17	8647.29	7812.38	56825.1	329.128	1743.79	859.494	-2.12587	0.0155791	1	2	0	0	0	ST-HSC,ST-HSC,
4	export_A10 ST-HSC SC3_CF0.csv	A10	SC3	CF	ST-HSC	HSC_SLAM	TT22	22	24	3	164933	106247	23767.3	456.916	303.273	218.7	103.469	164.093	2116.91	633.45	381.249	120.093	139327	66864.9	87186.5	7605.85	4948.93	-32.938	1265.95	14073.2	207.886	1.13431	-1.75956	1	1	0	0	0	SLAM-HSC,
5	export_A10 ST-HSC SC3_CV1.csv.1	A10	SC3	CV	ST-HSC	ckit+SCA1-	TT22	22	24	4	137988	51452	10113.9	1011.42	97.9754	156.752	10826.3	111.444	976.672	44.5696	167.844	7.81875	153230	63978	77073.9	4852.48	4080.28	11406.5	2934.1	965.501	86.3637	5.58228	1.12598	1	2	0	0	0	ckit-,SLAM+MEP,
6	export_A10 ST-HSC SC3_CV1.csv.2	A10	SC3	CV	ST-HSC	ckit+SCA1-	TT22	22	24	4	115530	69394.2	9456.72	1066.36	107.534	227.807	10200.4	118.279	981.358	12.4952	147.728	64.7255	153230	63978	77073.9	4852.48	4080.28	11406.5	2934.1	965.501	86.3637	5.6483	1.2972	2	2	0	0	0	ckit-,SLAM+MEP,
7	export_A10 ST-HSC SC3_VC0.csv	A10	SC3	VC	ST-HSC	SLAM+Flt3+	TT22	22	24	5	137008	75442	12168.3	471.687	632.162	301.662	45082.6	109.395	1510.11	510.448	229.51	25.6971	144662	62882	37593.3	5430.21	3361.15	27348	391.912	9854.73	275.445	-2.02	-3.32759	1	1	0	0	0	SLAM+FLT3+,
8	export_A11 HSC SC3_CF0.csv	A11	SC3	CF	HSC	HSC_ST	TT22	22	24	6	89207	57332.2	26131	372.236	92.3778	30.0978	31.5185	140.987	1095.12	1148.39	135.913	143.099	129696	68197.7	76417	3699.52	4740.3	-7.30711	3049.34	6280.6	308.048	0.986912	-3.0474	1	1	0	0	0	ST-HSC,
9	export_A12 HSC SC3_CF1.csv.1	A12	SC3	CF	HSC	ckit+SCA1-	TT22	22	24	7	105632	72760.2	11505.2	801.971	107.072	92.2189	25.2259	88.0013	387.294	14.232	204.81	24.9572	155836	56369.1	77772.5	3865.8	5407.77	-28.446	9498.21	653.189	-46.4141	5.31957	1.40445	1	2	0	0	0	SLAM+MEP,SLAM+MEP,
10	export_A12 HSC SC3_CF1.csv.2	A12	SC3	CF	HSC	ckit+SCA1-	TT22	22	24	7	94089.8	60877.2	10916	600.091	94.0911	41.5374	34.1422	107.623	487.253	17.6069	214.476	186.612	155836	56369.1	77772.5	3865.8	5407.77	-28.446	9498.21	653.189	-46.4141	5.02023	1.77785	1	2	0	0	0	SLAM+MEP,SLAM+MEP,
11	export_A12 HSC SC3_CV0.csv	A12	SC3	CV	HSC	HSC_SLAM	TT22	22	24	8	112577	63444.1	18816.9	551.514	194.131	299.942	19171.8	40.078	716.08	3246.6	429.746	43.6424	143210	72705.4	67985.9	1397.01	4159.43	10696.7	7099.86	35608.2	201.313	0.182183	-4.71492	1	1	0	0	0	SLAM-HSC,
12	export_A2 MPP SC2_CF1.csv.1	A2	SC2	CF	MPP	ckit+SCA1-	TT22	22	24	9	107942	49794.4	11535.8	150.777	804.809	327.43	66.4591	97.8206	445.841	100.856	714.758	135.504	190995	91571.7	106108	6001.47	8735.12	35.2123	-117.366	1076.42	1145.36	-2.96994	0.246785	1	2	0	0	0	MEP,GMP,
13	export_A2 MPP SC2_CF1.csv.2	A2	SC2	CF	MPP	ckit+SCA1-	TT22	22	24	9	101672	87143.2	12304.5	81.9793	485.46	174.531	86.9027	134.708	480.947	85.1262	805.112	191.95	190995	91571.7	106108	6001.47	8735.12	35.2123	-117.366	1076.42	1145.36	-2.72997	0.273635	2	2	0	0	0	MEP,GMP,
14	export_A3 ST-HSC SC2_CV0.csv	A3	SC2	CV	ST-HSC	HSC_ST	TT22	22	24	10	104929	73450.4	20476.4	5.49765	150.338	230.928	17853.8	-19.0719	83.2959	1290.13	307.809	68.7987	153103	68278.6	80464.2	522.479	3279.81	9533.45	-369.546	12517.6	421.361	-0.98348	-2.29884	1	1	0	0	0	ST-HSC,
15	export_A4 ST-HSC SC2_VC0.csv	A4	SC2	VC	ST-HSC	HSC_ST	TT22	22	24	11	122531	67309.5	12309.9	74.6925	66.8285	458.498	34382.5	68.3226	747.66	259.97	355.669	50.6956	152867	66962.5	49982.4	3919.07	5566.99	26014.1	1370.55	5697.2	5.23296	-2.03821	1.46853	1	1	0	0	0	ST-HSC,
16	export_A5 HSC SC2_CF1.csv	A5	SC2	CF	HSC	ckit+SCA1-	TT22	22	24	12	90245	53672.6	14087.3	2642.89	60.4659	135.74	21.3459	27.3651	26.5187	84.8117	323.134	27.7293	187983	78549.5	112663	1078.38	7977.69	-68.2831	29929.5	696.214	-55.5	5.11146	-0.149133	1	1	0	0	0	SLAM+MEP,
17	export_A5 HSC SC2_CV0.csv	A5	SC2	CV	HSC	HSC_SLAM	TT22	22	24	13	104265	60994.4	21712	1950.06	70.027	366.755	26370.3	-156.51	18.0612	2071.28	314.024	40.8845	166556	86186.9	77867.7	564.788	3112.36	15267.3	14112.7	16107.5	80.3486	1.39854	-5.34367	1	1	0	0	0	SLAM-HSC,
18	export_A5 HSC SC2_VC1.csv	A5	SC2	VC	HSC	ckit+SCA1-	TT22	22	24	14	117189	60184.1	7197.83	230.363	67.4711	173.193	23307.1	162.186	913.397	34.114	289.524	21.3764	153396	77948.6	61674.1	4915.49	5126.55	27573.9	3735.79	3730.28	-132.268	3.27389	2.34397	1	1	0	0	0	SLAM+MEP,
19	export_A5 HSC SC2_Vi0.csv	A5	SC2	Vi	HSC	ckit+SCA1-	TT22	22	24	15	140911	109806	1.35377	1593.29	48.819	61.9439	46318	102.492	188.193	19.0643	451.685	118.118	145955	59853.4	26.18	3277.55	5791.15	37895.2	15230.5	499.234	0.467097	5.24605	0.212156	1	1	0	0	0	SLAM+MEP,
20	export_A6 HSC SC2_CF0.csv	A6	SC2	CF	HSC	HSC_SLAM	TT22	22	24	16	144202	73189	34803.8	3815.53	131.114	79.275	37.9783	-16.532	67.7336	821.371	388.6	56.1361	143639	75693.5	85551.5	-130.866	3582.65	-46.4256	31211.2	25515.9	15.9197	2.98726	-2.93187	1	1	0	0	0	SLAM-HSC,
21	export_A6 HSC SC2_CV0.csv	A6	SC2	CV	HSC	HSC_SLAM	TT22	22	24	17	134440	75696.1	17269	5160	48.3503	261.503	18782.7	41.5599	518.261	202.51	394.423	73.4901	150467	59191.8	68402.4	5481.89	6304.45	11607.3	22537.1	6811.21	-4.55268	3.63358	-2.22012	1	1	0	0	0	SLAM-HSC,
22	export_A6 HSC SC2_VC0.csv	A6	SC2	VC	HSC	HSC_SLAM	TT22	22	24	18	89186.8	47854.9	11129.5	631.615	100.878	177.368	33273.3	74.9665	26.8312	1123.99	143.775	108.774	139854	52074.4	52207.7	165.587	3078.06	23002	9358.44	11325.8	25.9325	1.30017	-3.69514	1	1	0	0	0	SLAM-HSC,
23	export_A6 HSC SC2_Vi0.csv	A6	SC2	Vi	HSC	HSC_SLAM	TT22	22	24	19	148479	84328.3	4.26762	485.449	137.027	165.556	38760.9	60.0108	72.6386	1504.52	316.518	130.181	175967	69432.9	-9.52	-703.699	7556.98	31679.9	5515.69	5073.96	91.1139	1.02701	-3.52657	1	1	0	0	0	SLAM-HSC,
24	export_A7 MPP SC3_CF0.csv	A7	SC3	CF	MPP	MPP	TT22	22	24	20	127566	104243	18116.3	170.727	2836.63	1455.66	103.79	18.2572	1739.31	534.549	143.918	98.8244	179311	238474	103841	7406.75	3177.29	55.7984	2437.37	12377.2	4410.24	-2.7312	-3.75035	1	1	0	0	0	MPP,
25	export_A7 MPP SC3_CV0.csv	A7	SC3	CV	MPP	MPP	TT22	22	24	21	149643	75146.4	21336.5	308.932	1453.81	220.746	23501.3	165.095	2017.12	526.002	212.434	122.044	158257	75152.1	74114.4	4080.26	3265.57	12243.4	-224.706	27625.1	2963.32	-2.76327	-2.89649	1	1	0	0	0	MPP,
26	export_A8 MPP SC3_CF0.csv	A8	SC3	CF	MPP	MPP	TT22	22	24	22	106853	74388.8	20123.8	265.137	752.103	286.207	53.4735	-110.058	1448.05	2287.29	272.924	12.1435	125624	69980.3	57673.4	4453.57	2685.11	3.79391	444.423	13463.3	1470.01	-1.58496	-4.10191	1	1	0	0	0	MPP,
27	export_A8 MPP SC3_CV0.csv	A8	SC3	CV	MPP	MPP	TT22	22	24	23	126313	77963	18400.6	310.006	1616.16	167.646	16305.4	39.0111	1128.71	1685.82	165.542	67.3694	153828	73470.6	80173.9	1160.31	3415.35	9198.83	1807.02	69182	2122.92	-1.87754	-3.81411	1	1	0	0	0	MPP,
28	export_A9 ST-HSC SC3_CF0.csv	A9	SC3	CF	ST-HSC	MPP	TT22	22	24	24	130231	75113.8	21023.2	362.617	542.674	289.461	58.6736	181.245	1737.5	728.71	231.918	118.772	171290	93470.9	89432.1	5329.62	2506.91	-10.3957	1075.46	26405.2	371.888	-1.84095	-3.48661	1	1	0	0	0	MPP,
29	export_A9 ST-HSC SC3_VC0.csv	A9	SC3	VC	ST-HSC	HSC_ST	TT22	22	24	25	114365	66285	12620.7	21.147	373.12	267.45	43128.2	13.6535	1439.59	1955.42	250.977	145.136	147387	66247.3	49492.1	4769.05	2637.18	27751.4	863.223	17285.5	349.951	-1.34932	-2.55247	1	1	0	0	0	ST-HSC,
30	export_B1 MPP SC2_CV0.csv	B1	SC2	CV	MPP	MPP	TT22	22	24	26	92199.3	61466.5	17363.8	79.3664	940.162	275.376	17006.9	316.123	441.58	327.283	309.624	117.943	151486	83096.5	69870.9	6799.15	4199.05	13210.6	-424.165	7079.65	856.973	-2.92164	-1.35846	1	1	0	0	0	MPP,
31	export_B10 ST-HSC SC3_CV0.csv	B10	SC3	CV	ST-HSC	ckit+SCA1-	TT22	22	24	27	110479	65976.5	20678.8	759.659	42.9801	153.94	15841	14.6473	133.26	24.6972	248.204	132.202	151395	66978	56695.2	1186.67	6072.37	9344.59	1751.22	1524.89	91.4357	5.23846	1.01627	1	1	0	0	0	SLAM+MEP,
32	export_B10 ST-HSC SC3_VC0.csv	B10	SC3	VC	ST-HSC	HSC_ST	TT22	22	24	28	126842	88873.8	13554.8	222.101	304.289	266.877	38050.5	160.254	1060.09	337.215	262.75	205.926	155158	72579.3	55005.4	3471.07	6564	23844.7	-114.703	5920.08	290.483	-1.40771	-0.595393	1	1	0	0	0	ST-HSC,
33	export_B10 ST-HSC SC3_Vi3.csv	B10	SC3	Vi	ST-HSC	HSC_SLAM	TT22	22	24	29	98675.7	39003.6	-13.9136	5098.43	-188.582	209097	4956.28	109617	-5363.63	2052.35	1644.82	34.0727	164441	81976.7	7.14	1098.84	1514.64	34862.1	419.362	49533.8	350.244	-5.46888	-5.93931	1	1	0	0	0	SLAM-HSC,
34	export_B12 HSC SC3_CV0.csv	B12	SC3	CV	HSC	ckit+SCA1-	TT22	22	24	30	127986	57790.8	17156	1729.25	71.4952	108.186	16315.4	112.436	68.7907	52.1307	193.536	133.336	135499	66527	59057.3	656.889	6544.65	10601.4	8151.69	632.44	94.4342	5.40123	0.160673	1	1	0	0	0	SLAM+MEP,
35	export_B12 HSC SC3_VC0.csv	B12	SC3	VC	HSC	HSC_SLAM	TT22	22	24	31	104642	70015.7	10715.8	824.014	127.396	182.805	34157.9	38.7483	106.705	374.901	200.592	189.327	175974	101433	70476.6	1662.65	4716.36	38604.1	10194.3	38366.2	295.078	3.08826	-1.60554	1	1	0	0	0	SLAM-HSC,
36	export_B12 HSC SC3_Vi1.csv	B12	SC3	Vi	HSC	HSC_SLAM	TT22	22	24	32	100478	58706.1	1.30579	411.807	59.2961	105.759	22831	86.109	783.711	236.861	165.683	49.0121	159053	65874.8	-14.28	6964.07	3624.7	37174.8	3728.96	5771.4	74.8486	2.69771	-0.602654	1	2	0	0	0	GMP,SLAM-HSC,
37	export_B12 HSC SC3_Vi3.csv	B12	SC3	Vi	HSC	ckit+SCA1-	TT22	22	24	32	72888.8	45144.3	-11.1195	6151.05	-118.136	210792	4825.22	77122.7	-4066.73	-1026.07	686.695	71.5389	159053	65874.8	-14.28	6964.07	3624.7	37174.8	3728.96	5771.4	74.8486	-6.85844	4.06532	2	2	0	0	0	GMP,SLAM-HSC,
38	export_B2 MPP SC2_Vi0.csv	B2	SC2	Vi	MPP	MPP	TT22	22	24	33	106511	74123.3	3.8353	55.3682	944.774	296.162	47453.5	10.1462	370.04	243.108	326.425	164.943	157567	84274.6	-21.42	2827.17	3490.52	37182.5	857.087	2600.18	1455.2	-3.07535	-0.918659	1	1	0	0	0	MPP,
39	export_B4 ST-HSC SC2_CF0.csv	B4	SC2	CF	ST-HSC	HSC_ST	TT22	22	24	34	117591	67357.4	24511	168.184	293.734	760.073	131.761	22.6672	554.872	327.015	458.753	0.903798	140129	65206.1	80855.7	5796.57	3716.96	-16.3071	735.116	3565.26	450.71	-2.56456	0.945343	1	1	0	0	0	ST-HSC,
40	export_B5 HSC SC2_CV0.csv	B5	SC2	CV	HSC	ckit+SCA1-	TT22	22	24	35	92461.3	47552.1	14861	1187.71	26.8979	173.246	17569.8	122.005	558.711	17.8708	129.855	166.093	136608	54315.2	47433.4	4121.5	4151.17	10590.4	8250.55	1364.2	23.5403	5.71068	1.0975	1	1	0	0	0	ckit-,
41	export_B5 HSC SC2_VC1.csv	B5	SC2	VC	HSC	HSC_SLAM	TT22	22	24	36	130993	69072.8	10072.7	1350.02	107.139	1907.86	27865.6	124.367	663.166	157.555	159.95	14.2063	193158	92354.7	70086.2	6720.11	4455.9	44079.6	17937.8	453.327	-50.4086	4.20374	-0.323642	1	1	0	0	0	SLAM-HSC,
42	export_B5 HSC SC2_Vi0.csv	B5	SC2	Vi	HSC	HSC_SLAM	TT22	22	24	37	114561	58960.5	0.649854	1954.93	122.296	144.802	79988.1	-151.614	26.0545	1295.66	353.15	100.405	143206	99404.3	-24.99	5.30847	3544.52	64568.3	18502.6	12567.1	-39.6831	2.68787	-3.12894	1	1	0	0	0	SLAM-HSC,
43	export_B6 HSC SC2_CF0.csv	B6	SC2	CF	HSC	HSC_SLAM	TT22	22	24	38	150154	79034.4	22313	1256.76	120.527	166.287	41.3934	-22.5465	51.3332	3508.24	363.008	67.6638	150223	61675.3	64429	756.447	5149.22	-30.4475	4736.28	13547.4	38.5812	1.12917	-5.34304	1	1	0	0	0	SLAM-HSC,
44	export_B6 HSC SC2_CV0.csv	B6	SC2	CV	HSC	ckit+SCA1-	TT22	22	24	39	120599	121846	24118.8	610.434	67.6385	319.259	23742.1	-28.3777	86.9042	102.167	282.935	60.1259	130573	70448	77887.9	1508.51	9733.48	12472.1	5228	1771.9	338.184	3.74419	0.243242	1	1	0	0	0	GMP,
45	export_B7 MPP SC3_CV0.csv	B7	SC3	CV	MPP	MPP	TT22	22	24	40	116516	83233.1	20312.5	271.43	631.671	188.838	21333.4	61.6802	966.857	872.819	208.542	123.758	153231	73240.9	52777.7	3297.41	4686.43	12933.6	-87.8348	870.357	963.255	-1.91071	-3.52104	1	1	0	0	0	MPP,
46	export_B8 MPP SC3_CF1.csv.1	B8	SC3	CF	MPP	MPP	TT22	22	24	41	95040.5	63702.7	11563.2	252.019	404.311	888.015	47.6487	264.194	938.947	247.119	267.228	99.3109	160337	63174.7	92340.4	9512.12	3232.7	-21.326	815.081	3566.88	1433.76	-2.87189	0.795608	1	2	0	0	0	ST-HSC,MPP,
47	export_B8 MPP SC3_CF1.csv.2	B8	SC3	CF	MPP	HSC_ST	TT22	22	24	41	90655.4	63506.8	12277.3	154.056	391.238	1181.14	81.4119	128.834	1223.37	154.195	171.531	197.633	160337	63174.7	92340.4	9512.12	3232.7	-21.326	815.081	3566.88	1433.76	-2.94921	0.8778	2	2	0	0	0	ST-HSC,MPP,
48	export_B8 MPP SC3_VC0.csv	B8	SC3	VC	MPP	ckit-	TT22	22	24	42	113794	80004.3	17019.3	725.171	908.236	369.205	46043.4	1.11573	901.536	2854.04	92.176	37.5424	146536	60078.3	67563.4	4388.35	2243.08	24213.7	-102.289	48970	1250.81	-1.3455	-4.49547	1	1	0	0	0	MyP,
49	export_B8 MPP SC3_Vi0.csv	B8	SC3	Vi	MPP	MPP	TT22	22	24	43	173029	132539	6.66911	158.848	969.793	1343.07	43829.7	281.851	1118.29	231.261	660.831	131.527	183861	74835.5	45.22	4435.79	5761.9	35085	483.05	1754.59	1592.23	-3.91864	-0.103872	1	1	0	0	0	MPP,
50	export_B9 ST-HSC SC3_CF0.csv	B9	SC3	CF	ST-HSC	MPP	TT22	22	24	44	159511	123556	26913.4	340.889	702.04	131.296	57.2408	243.468	651.3	1972.84	404.194	125.995	171180	77970	93718.5	190.361	11625.3	-11.0683	-488.032	7561.74	484.319	-1.10692	-4.1373	1	1	0	0	0	MPP,
51	export_B9 ST-HSC SC3_VC1.csv	B9	SC3	VC	ST-HSC	ckit+SCA1-	TT22	22	24	45	179723	147917	11549.6	174.695	145.135	16212.1	28675.2	267.555	417.649	-165.291	354.659	89.2689	154226	127395	88818	4345.97	4204.8	34875.6	31.4883	561.741	274.446	-6.85572	4.16581	1	1	0	0	0	GMP,
52	export_B9 ST-HSC SC3_Vi0.csv	B9	SC3	Vi	ST-HSC	HSC_ST	TT22	22	24	46	115428	73630	5.49861	32.9018	258.115	198.019	62713.4	159.971	1426.07	375.089	337.825	73.2512	127454	70099.3	-20.23	7779.58	6019.48	54368	-1850.57	1330.01	456.861	-1.10455	-0.464174	1	1	0	0	0	ST-HSC,
53	export_C1 MPP SC2_CV0.csv	C1	SC2	CV	MPP	MPP	TT22	22	24	47	102203	50716.7	20326.5	27.9347	703.084	220.881	17812.1	12.6172	138.433	260.558	201.758	38.5433	146003	69556.7	82935.9	2345.64	2834.81	10350	-337.016	5587.48	1052.62	-2.83071	-0.939296	1	1	0	0	0	MPP,
54	export_C10 ST-HSC SC3_CF0.csv	C10	SC3	CF	ST-HSC	HSC_ST	TT22	22	24	48	126271	78342.6	29035.9	126.977	266.191	366.656	57.8986	91.9946	1290.97	298.309	228.077	179.327	124389	59954.6	82031.5	1914.97	4277.95	-7.22572	1175.68	6030.25	482.427	-1.47933	-0.448737	1	1	0	0	0	ST-HSC,
55	export_C10 ST-HSC SC3_CV0.csv	C10	SC3	CV	ST-HSC	HSC_ST	TT22	22	24	49	125581	94634.9	21295.1	186.06	131.307	498.19	18964.1	143.829	1597.32	253.869	268.969	166.484	163048	81812.5	74646.3	4541.09	5813.2	10185.4	287.027	1979.82	336.959	-2.07937	1.44505	1	1	0	0	0	ST-HSC,
56	export_C10 ST-HSC SC3_VC0.csv	C10	SC3	VC	ST-HSC	HSC_ST	TT22	22	24	50	119185	88471.9	18002.7	174.116	195.224	451.736	47690.4	207.058	1877.4	169.101	546.962	85.0614	147308	64398	61887.1	7370.91	6706.93	29670.4	-377.38	580.785	206.183	-2.1685	1.50314	1	1	0	0	0	ST-HSC,
57	export_C11 HSC SC3_CF0.csv	C11	SC3	CF	HSC	HSC_SLAM	TT22	22	24	51	157930	131257	27344.2	1241.06	85.1982	189.041	57.7787	141.548	932.297	360.824	389.909	81.484	158667	96498.3	72529.3	3941.78	7090.37	-11.418	6136.16	762.11	113.531	3.22669	-1.77741	1	1	0	0	0	SLAM-HSC,
58	export_C11 HSC SC3_CV0.csv	C11	SC3	CV	HSC	HSC_SLAM	TT22	22	24	52	140829	100837	20012.2	1114.38	154.649	92.5875	27009.5	55.0119	557.897	500.614	229.678	96.7448	122940	78714.9	42292.6	3256.39	5354.57	13706.7	6614.71	19509.5	150.021	3.01745	-1.75425	1	1	0	0	0	SLAM-HSC,
59	export_C12 HSC SC3_VC0.csv	C12	SC3	VC	HSC	ckit+SCA1-	TT22	22	24	53	137430	121267	19518.1	2703.69	67.4697	293.585	61412.2	179.113	1531.73	105.729	296.216	151.334	132371	76997.8	55439.7	7429.48	4247.99	38050.3	16727.3	1317.97	112.544	4.43664	-0.540326	1	1	0	0	0	SLAM+MEP,
60	export_C2 MPP SC2_CF0.csv	C2	SC2	CF	MPP	MPP	TT22	22	24	54	92982.3	56534.4	18550.8	129.973	1276.86	258.422	47.6681	72.8487	416.517	677.396	156.323	64.4439	152181	68795.1	77902.2	2870.11	2369.19	5.07832	992.942	19209.7	1008.43	-2.70269	-2.67846	1	1	0	0	0	MPP,
61	export_C2 MPP SC2_CV0.csv	C2	SC2	CV	MPP	HSC_ST	TT22	22	24	55	122234	78871.7	19124.9	116.024	215.382	267.292	18632.4	56.5956	579.496	304.173	343.792	85.5052	152893	83714.1	77547.5	2514.33	5137.38	11081.1	309.046	8358.02	9128.79	-1.28837	-0.476293	1	1	0	0	0	ST-HSC,
62	export_C2 MPP SC2_VC0.csv	C2	SC2	VC	MPP	MPP	TT22	22	24	56	121528	64646.2	14694	232.042	1306.52	215.208	40801.3	82.7082	732.279	731.876	212.135	61.4469	165397	78397.2	72428.2	4032.7	4006.9	25910	-541.12	29017.1	1801.26	-2.76433	-2.83613	1	1	0	0	0	MPP,
63	export_C3 ST-HSC SC2_CF0.csv	C3	SC2	CF	ST-HSC	HSC_ST	TT22	22	24	57	89311.5	80673	18420.5	60.4305	186.069	282.969	38.7404	120.497	676.358	161.924	371.797	126.554	142020	55279.1	71510.7	4037.03	5988.35	-8.22291	-589.71	1031.37	192.835	-2.03025	1.10769	1	1	0	0	0	ST-HSC,
64	export_C3 ST-HSC SC2_CV1.csv	C3	SC2	CV	ST-HSC	ckit+SCA1-	TT22	22	24	58	74174.2	60917.7	9986.83	49.555	152.985	93.9191	12959.6	124.316	328.249	117.021	248.513	109.937	127320	80859.3	54810.2	9735.31	6349.22	15690.3	-1580.24	1977.09	527.67	0.489742	1.61093	1	1	0	0	0	MEP,
65	export_C3 ST-HSC SC2_VC0.csv	C3	SC2	VC	ST-HSC	MPP	TT22	22	24	59	112076	75236.9	12910.2	99.3156	770.048	369.149	36794.4	0.617308	612.127	207.707	376.686	116.034	147106	71809.4	47178.7	3620.91	3789.5	22338.1	2559.24	11202.2	586.306	-3.23534	-0.575077	1	1	0	0	0	MPP,
66	export_C3 ST-HSC SC2_Vi0.csv	C3	SC2	Vi	ST-HSC	HSC_ST	TT22	22	24	60	141047	84906.2	3.65071	134.49	120.339	184.179	43803.9	82.6652	821.275	180.838	491.151	171.969	148468	70508.7	-21.42	3029.63	6089.83	33961.8	448.483	698.595	32.0307	-0.100107	0.750749	1	1	0	0	0	ST-HSC,
67	export_C4 ST-HSC SC2_Vi0.csv	C4	SC2	Vi	ST-HSC	ckit+SCA1-	TT22	22	24	61	115331	79367.2	1.88095	51.317	580.297	422.997	53525	89.2359	1305.87	124.01	317.323	122.225	170551	73214.8	-23.8	6683.27	3732.3	50940.1	36.8857	2558.29	468.113	-3.12199	0.115492	1	1	0	0	0	GMP,
68	export_C5 HSC SC2_CF0.csv	C5	SC2	CF	HSC	HSC_SLAM	TT22	22	24	62	131277	85434.5	20184.3	6836.74	-8.30226	168.58	40.2077	-156.98	53.9659	1504.81	208.224	67.1393	158017	79939.4	71112	558.72	5496.18	-4.81859	32199.3	7362.68	-136.15	1.80324	-5.44834	1	1	0	0	0	SLAM-HSC,
69	export_C5 HSC SC2_CV0.csv	C5	SC2	CV	HSC	HSC_SLAM	TT22	22	24	63	104159	77545	18533	1433.15	108.891	572.715	18198.6	101.408	803.401	232.189	336.11	149.756	137663	77052.5	61914.5	4661.64	4850.9	12254.6	17605.5	2218.09	16.264	4.13216	-0.27882	1	1	0	0	0	SLAM-HSC,
70	export_C7 MPP SC3_CV0.csv	C7	SC3	CV	MPP	SLAM+Flt3+	TT22	22	24	64	127154	109757	19968.6	642.535	1475.2	609.005	25264.6	11.7507	1046.85	2700.25	252.355	144.778	164066	100943	71321.5	6684.13	2785.46	15210.8	-599.729	50364	1595.61	-2.01378	-4.38872	1	1	0	0	0	SLAM+FLT3+,
71	export_C7 MPP SC3_VC0.csv	C7	SC3	VC	MPP	SLAM+Flt3+	TT22	22	24	65	173624	129577	15550.8	708.19	486.139	557.747	46105.6	27.7827	1883.5	1023.73	165.307	175.186	159540	93094.9	64206.5	4203.04	3905.02	34441.5	1480.43	37343.6	1789.47	-1.85644	-4.12969	1	1	0	0	0	SLAM+FLT3+,
72	export_C7 MPP SC3_Vi0.csv	C7	SC3	Vi	MPP	SLAM+Flt3+	TT22	22	24	66	145687	98663.3	4.37319	554.268	859.211	123.182	48146.8	42.5451	787.667	1646.54	183.378	128.699	173927	91244.4	38.08	2527.8	2969.69	44000.8	65.6486	8640.69	1404.04	-1.11042	-4.18174	1	1	0	0	0	SLAM+FLT3+,
73	export_C8 MPP SC3_CV0.csv	C8	SC3	CV	MPP	HSC_ST	TT22	22	24	67	137517	109703	24885.5	32.7879	324.614	253.293	22347.3	-44.8405	573.999	3217.07	202.488	73.4324	161568	71309.6	89754.6	2447.45	5228.94	12831.5	-127.768	4759.71	681.337	-1.09434	-2.86532	1	1	0	0	0	ST-HSC,
74	export_C9 ST-HSC SC3_CV0.csv	C9	SC3	CV	ST-HSC	HSC_ST	TT22	22	24	68	141160	104923	22471.3	367.456	231.129	440.78	21444.6	134.256	508.548	1040.37	236.454	102.574	151633	81493.6	83929.5	2197.44	6758.14	12718	576.784	8411.4	349.489	-1.4772	-3.61845	1	1	0	0	0	ST-HSC,
75	export_C9 ST-HSC SC3_VC1.csv.1	C9	SC3	VC	ST-HSC	HSC_ST	TT22	22	24	69	121252	83434.6	10427.8	330.534	76.6216	219.55	25078.7	36.3585	1284.21	184.416	330.311	45.8723	166444	81090.2	72980.3	4622.11	7405.99	30649.8	2805.01	598.954	127.219	3.01119	0.83284	1	2	0	0	0	GMP,ST-HSC,
76	export_C9 ST-HSC SC3_VC1.csv.2	C9	SC3	VC	ST-HSC	ckit+SCA1-	TT22	22	24	69	126858	89134.9	10251.4	310.929	137.379	326.523	23854.4	97.0524	1174.16	116.937	250.319	73.7082	166444	81090.2	72980.3	4622.11	7405.99	30649.8	2805.01	598.954	127.219	3.13431	0.947572	2	2	0	0	0	GMP,ST-HSC,
77	export_D1 MPP SC2_CF0.csv	D1	SC2	CF	MPP	ckit+SCA1-	TT22	22	24	70	102212	89311.8	19173	82.7001	251.036	47.5537	36.1379	158.829	1056.21	71.1896	448.616	63.216	199393	104584	112060	11691	7721.33	-31.2444	984.405	3516.12	723.311	0.146984	1.90546	1	1	0	0	0	MEP,
78	export_D1 MPP SC2_VC0.csv	D1	SC2	VC	MPP	HSC_SLAM	TT22	22	24	71	130429	91079	14216.3	861.905	228.099	209.455	44562.7	1.59871	65.3091	1646.98	258.707	51.8179	149959	81654.2	37274.4	1509.64	3741.41	30272.4	2543.29	26176.2	7361.09	0.319028	-4.62839	1	1	0	0	0	SLAM-HSC,
79	export_D10 ST-HSC SC3_CF1.csv	D10	SC3	CF	ST-HSC	ckit+SCA1-	TT22	22	24	72	111779	68816.3	10130.2	203.294	134.497	88.1354	54.166	118.583	948.701	60.2149	258.669	120.049	152528	65504.7	69690	3126.63	5333.88	-13.2244	667.234	572.522	224.618	2.82357	3.00539	1	1	0	0	0	SLAM+MEP,
80	export_D10 ST-HSC SC3_Vi0.csv	D10	SC3	Vi	ST-HSC	HSC_ST	TT22	22	24	73	120556	88618.5	-0.849741	76.919	197.233	244.677	40948.1	-236.251	8.70383	8866.38	193.53	107.856	162795	93487.6	0	1301.64	3157.59	32300.2	2662.78	20764.1	50.9292	-0.742232	-3.37257	1	1	0	0	0	ST-HSC,
81	export_D11 HSC SC3_CF1.csv	D11	SC3	CF	HSC	ckit+SCA1-	TT22	22	24	74	141067	86887.4	15644.9	1755.07	48.8001	94.0477	42.2147	152.937	980.961	92.7639	216.027	13.1282	189645	83325	74839.1	8619.66	4365.97	-27.4381	16794.7	872.32	491.786	5.18673	-0.0776384	1	1	0	0	0	SLAM+MEP,
82	export_D11 HSC SC3_CV0.csv	D11	SC3	CV	HSC	ckit-	TT22	22	24	75	107431	69545.5	31906.2	2666.49	173.501	363.79	35260.8	-95.0242	4.05185	2524.26	105.595	125.891	133752	105717	83565.4	1072.52	4125.83	21439.4	19889.3	26860.9	477.533	1.37756	-5.53565	1	1	0	0	0	SLAM-HSC,
83	export_D12 HSC SC3_CF0.csv	D12	SC3	CF	HSC	ckit+SCA1-	TT22	22	24	76	83503.6	66542.9	16762.4	157.036	36.163	67.4885	36.5151	70.8916	267.437	62.7278	508.511	224.13	126873	70759.8	100404	3714.52	4872.44	-18.0369	3309.94	1671.93	-68.7233	1.29794	2.87183	1	1	0	0	0	MEP,
84	export_D12 HSC SC3_CV0.csv	D12	SC3	CV	HSC	HSC_SLAM	TT22	22	24	77	108818	79170.4	24241	3517.58	151.236	195.938	20350.8	-301.328	20.0158	8448.7	451.369	213.239	146761	170923	103475	2620.23	6494.74	11698	23534.9	22686	17.5025	1.35627	-5.91309	1	1	0	0	0	SLAM-HSC,
85	export_D12 HSC SC3_VC0.csv	D12	SC3	VC	HSC	HSC_SLAM	TT22	22	24	78	106260	76707.1	16869.1	1572.63	81.2659	220.151	43210.4	-17.9157	40.6721	414.446	331.99	172.491	147266	61033.9	64808.6	589.114	4650.78	23332.7	12894.8	5279.27	-162.63	3.32165	-2.10088	1	1	0	0	0	SLAM-HSC,
86	export_D12 HSC SC3_Vi1.csv.1	D12	SC3	Vi	HSC	ckit+SCA1-	TT22	22	24	79	89755	67672.1	1.61638	719.953	99.2228	202.707	20265.6	150.149	528.229	14.6978	181.382	194.961	144136	62059.7	24.99	3345.12	3628.38	35541	9798.15	679.203	-40.416	5.42375	1.41586	1	2	0	0	0	SLAM+MEP,SLAM+MEP,
87	export_D12 HSC SC3_Vi1.csv.2	D12	SC3	Vi	HSC	ckit+SCA1-	TT22	22	24	79	111880	73723.8	1.35038	684.44	136.96	169.568	20869.2	122.287	517.099	62.7508	171.469	219.706	144136	62059.7	24.99	3345.12	3628.38	35541	9798.15	679.203	-40.416	5.36358	1.30515	1	2	0	0	0	SLAM+MEP,SLAM+MEP,
88	export_D2 MPP SC2_CF0.csv	D2	SC2	CF	MPP	MPP	TT22	22	24	80	108952	57781	18409.4	108.033	758.18	857.639	55.6856	-17.1441	127.738	296.297	276.227	171.704	159339	99275.8	83609.4	2626.16	2460.23	41.3448	1289	11825.2	2022.17	-3.76084	-0.155251	1	1	0	0	0	MPP,
89	export_D2 MPP SC2_CV0.csv	D2	SC2	CV	MPP	MPP	TT22	22	24	81	115178	81287.7	27624.5	85.9792	430.398	2097.7	17520.7	28.5527	724.947	226.519	671.783	88.6374	168953	85694.3	95483.2	6102.15	7337.76	9900.91	-57.1445	781.994	1493.51	-3.90252	0.646761	1	1	0	0	0	MPP,
90	export_D3 ST-HSC SC2_CF0.csv	D3	SC2	CF	ST-HSC	ckit+SCA1-	TT22	22	24	82	129532	95475.6	22785.4	97.2196	365.076	9.48037	47.05	123.162	587.796	125.976	360.51	105.953	139147	60592.4	75134.2	3292.05	4754.69	-0.711185	615.521	6132.81	426.817	0.139913	1.78975	1	1	0	0	0	MEP,
91	export_D4 ST-HSC SC2_CF0.csv	D4	SC2	CF	ST-HSC	HSC_ST	TT22	22	24	83	164138	84676.1	22902.4	223.823	218.994	77.5869	67.2274	178.511	1260.43	500.334	640.548	3.71976	170846	79976.3	80139.4	5302.16	3353.17	3.20624	2559.51	10183.8	57.2786	0.717977	-1.09016	1	1	0	0	0	ST-HSC,
92	export_D4 ST-HSC SC2_Vi0.csv	D4	SC2	Vi	ST-HSC	ckit+SCA1-	TT22	22	24	84	134736	87122.8	1.96243	64.9718	213.495	78.4155	30680.3	105.607	235.1	19.5053	556.063	192.165	180027	98284.5	-17.85	2213.86	8192.34	50573.5	-695.666	516.659	294.95	0.0348401	2.98052	1	1	0	0	0	MEP,
93	export_D5 HSC SC2_CF1.csv.1	D5	SC2	CF	HSC	ckit+SCA1-	TT22	22	24	85	122463	54688.7	14264.2	233.868	54.3446	300.315	55.3377	116.243	788.175	147.983	473.982	52.8149	131421	87620.9	74952.2	5441.64	7340.07	-11.1937	3049.69	2409	116.063	2.85373	1.2032	1	2	0	0	0	MyP,GMP,
94	export_D5 HSC SC2_CF1.csv.2	D5	SC2	CF	HSC	ckit+SCA1-	TT22	22	24	85	94057	51204.2	12764	216.345	70.6025	327.375	19.9098	20.4309	541.028	52.8908	137.125	107.18	131421	87620.9	74952.2	5441.64	7340.07	-11.1937	3049.69	2409	116.063	3.36964	3.3647	2	2	0	0	0	MyP,GMP,
95	export_D6 HSC SC2_CV0.csv	D6	SC2	CV	HSC	HSC_SLAM	TT22	22	24	86	100245	53113.2	21289.1	923.433	57.9568	326.029	25419	-56.3838	450.889	180.552	235.122	108.341	134610	71320.3	42876.9	3925.92	4807.26	16226.1	14192.8	5232.09	192.178	4.00117	-0.170243	1	1	0	0	0	SLAM-HSC,
96	export_D6 HSC SC2_VC0.csv	D6	SC2	VC	HSC	ckit+SCA1-	TT22	22	24	87	94760.3	81494.1	17261.5	1164.07	46.7883	274.951	46005.2	1.31416	63.5491	10.8474	386.788	20.5198	145308	70168.4	69229.4	789.445	5432.24	28873.3	11603.5	956.113	205.105	4.70536	0.518219	1	1	0	0	0	SLAM+MEP,
97	export_D7 MPP SC3_CF0.csv	D7	SC3	CF	MPP	MPP	TT22	22	24	88	98408.8	52543.1	16973.4	332.225	650.628	161.786	46.311	-19.3943	85.2231	2699.93	179.44	205.785	163530	141716	58477.8	884.878	2882.49	-2.60425	2454.18	90994.4	1891.88	-1.09239	-4.39064	1	1	0	0	0	MPP,
98	export_D7 MPP SC3_Vi0.csv	D7	SC3	Vi	MPP	MPP	TT22	22	24	89	137161	92405.8	2.06164	-5.42933	1000.14	278.396	37641.1	104.345	1993.64	1747.38	348.044	201.024	220272	114853	11.9	5174.38	4863.54	63954.8	1280.84	14402.9	1383.92	-2.06566	-2.33823	1	1	0	0	0	MPP,
99	export_D8 MPP SC3_CV0.csv	D8	SC3	CV	MPP	MPP	TT22	22	24	90	122796	66501.2	15402.2	65.5353	977.631	257.788	17500.6	98.8558	1731.73	276.236	350.672	76.3505	166723	107571	102104	6897.39	8332.86	18828.7	1022.08	2736.31	2312.66	-3.01282	-1.1286	1	1	0	0	0	MPP,
100	export_D8 MPP SC3_VC0.csv	D8	SC3	VC	MPP	MPP	TT22	22	24	91	116781	74588.2	10351.4	318.633	750.927	337.625	32984.7	-36.163	276.696	2834.27	301.739	35.1279	147644	68373.8	38952.3	1160.19	2126.66	22321.9	1129.18	51943.4	821.334	-1.54726	-4.24561	1	1	0	0	0	MPP,
101	export_D8 MPP SC3_Vi0.csv	D8	SC3	Vi	MPP	SLAM+Flt3+	TT22	22	24	92	155024	123561	2.55063	682.528	2317.96	211.827	53295.5	85.6956	729.955	1456.2	302.024	111.366	176117	94249.2	5.95	2532.26	2774.2	43696.8	1070.93	61085	4982.94	-1.9501	-4.30962	1	1	0	0	0	SLAM+FLT3+,
102	export_E1 MPP SC2_VC0.csv	E1	SC2	VC	MPP	HSC_ST	TT22	22	24	93	94767.3	93613.5	17640.5	80.4803	383.062	218.597	52140.1	54.8929	775.331	429.38	670.388	196.669	177330	99973.1	62563.1	8645.59	7137.84	39292.1	923.745	1288.54	735.621	-1.87376	-0.738702	1	1	0	0	0	ST-HSC,
103	export_E11 HSC SC3_CV0.csv	E11	SC3	CV	HSC	SLAM+Flt3+	TT22	22	24	94	140456	127238	21200.1	1215.4	493.769	170.569	22740.5	-40.6602	514.305	3835.98	253.18	216.578	162045	73928.8	66688.8	654.922	3670.2	11516.3	3383.42	29788.6	288.064	-0.0935197	-4.94033	1	1	0	0	0	SLAM+FLT3+,
104	export_E11 HSC SC3_Vi1.csv.1	E11	SC3	Vi	HSC	HSC_ST	TT22	22	24	95	116833	68166	9.50272	286.593	134.671	92.8369	27264.9	102.941	1303.13	172.018	255.991	7.11069	163390	83211.9	7.14	7657.08	3882.69	40388.2	3258.43	4759.12	4.3747	1.69408	0.0156829	1	2	0	0	0	ST-HSC,ST-HSC,
105	export_E11 HSC SC3_Vi1.csv.2	E11	SC3	Vi	HSC	HSC_ST	TT22	22	24	95	130076	101829	3.24693	227.439	80.4704	58.7776	26108.7	121.224	1601.47	201.836	207.344	16.9377	163390	83211.9	7.14	7657.08	3882.69	40388.2	3258.43	4759.12	4.3747	1.32689	0.0395417	1	2	0	0	0	ST-HSC,ST-HSC,
106	export_E12 HSC SC3_VC0.csv	E12	SC3	VC	HSC	HSC_SLAM	TT22	22	24	96	131299	84248.7	14945.6	962.686	74.0515	173.961	38990.1	-109.442	85.9491	1485.2	369.395	130.109	145728	56156.1	61780	42.3997	7924.04	24895	3606.98	2126.22	63.1649	1.48427	-3.99014	1	1	0	0	0	SLAM-HSC,
107	export_E12 HSC SC3_Vi0.csv	E12	SC3	Vi	HSC	ckit-	TT22	22	24	97	127244	95916.4	1.28664	5013.35	30.8858	104.156	50154.4	27.2904	40.112	121.235	66.6974	56.5266	174148	73884.7	44.03	110.349	5856.76	39943.7	20954.4	1522.27	-55.5893	5.0087	-0.465532	1	1	0	0	0	ckit-,
108	export_E2 MPP SC2_CF0.csv	E2	SC2	CF	MPP	MPP	TT22	22	24	98	125088	93594	18170.9	-31.1105	535.18	1518.84	79.4977	36.4312	1126.44	241.696	587.861	39.5787	139837	64853.8	66365.1	7398.26	5018.76	-20.6523	494.498	2013.44	1072.63	-3.80819	0.383237	1	1	0	0	0	MPP,
109	export_E2 MPP SC2_VC0.csv	E2	SC2	VC	MPP	MPP	TT22	22	24	99	102297	61661.2	10115.9	92.5749	457.343	240.862	32376.4	18.087	440.769	1272.16	246.132	54.1318	153632	70837.1	30321.2	2454.49	2553.44	23274.3	44.9022	37797.7	848.008	-1.48843	-2.5095	1	1	0	0	0	MPP,
110	export_E3 ST-HSC SC2_CF1.csv.1	E3	SC2	CF	ST-HSC	ckit+SCA1-	TT22	22	24	100	169478	132376	14101.5	103.543	99.4237	1917.33	71.6312	185.389	1032.79	27.4586	438.05	38.7169	222718	118826	88376.5	8041.9	5801.54	-23.1389	325.216	1663.91	157.007	-3.81084	3.36142	1	2	0	0	0	GMP,GMP,
111	export_E3 ST-HSC SC2_CF1.csv.2	E3	SC2	CF	ST-HSC	ckit+SCA1-	TT22	22	24	100	151668	124731	13020.6	64.406	118.06	992.453	56.8839	168.726	1036.46	73.087	427.619	171.089	222718	118826	88376.5	8041.9	5801.54	-23.1389	325.216	1663.91	157.007	-3.08252	2.9246	1	2	0	0	0	GMP,GMP,
112	export_E4 ST-HSC SC2_VC1.csv.1	E4	SC2	VC	ST-HSC	ckit+SCA1-	TT22	22	24	101	162085	98427.9	8797.54	153.526	146.476	4715.19	24044.9	372.453	486.863	14.7862	385.942	57.6265	211496	232745	74376.2	9708.27	4766.47	40969.3	494.62	589.836	308.346	-4.96616	3.66768	1	2	0	0	0	GMP,GMP,
113	export_E4 ST-HSC SC2_VC1.csv.2	E4	SC2	VC	ST-HSC	ckit+SCA1-	TT22	22	24	101	167765	153426	8439.41	132.026	89.982	5520.83	23160.6	299.02	422.816	-37.2203	305.093	66.7892	211496	232745	74376.2	9708.27	4766.47	40969.3	494.62	589.836	308.346	-5.29455	3.85916	1	2	0	0	0	GMP,GMP,
114	export_E4 ST-HSC SC2_Vi0.csv	E4	SC2	Vi	ST-HSC	HSC_ST	TT22	22	24	102	135964	99119.2	7.88069	222.89	324.84	115.072	73287.9	-17.1125	279.576	2400.06	555.344	101.451	162729	92347.6	14.28	2792.38	4385.7	60890.4	1690.73	31115	335.838	0.194066	-3.74413	1	1	0	0	0	ST-HSC,
115	export_E5 HSC SC2_VC1.csv.1	E5	SC2	VC	HSC	ckit+SCA1-	TT22	22	24	103	89287.7	41342.2	13202.3	278.825	70.0565	245.056	36801.8	-68.878	85.9423	-3.67839	248.637	12.9622	156921	107746	73670.5	2600.13	3061.36	44847.1	10624.3	701.832	283.651	3.48668	2.19032	1	2	0	0	0	SLAM+MEP,SLAM+MEP,
116	export_E5 HSC SC2_VC1.csv.2	E5	SC2	VC	HSC	ckit+SCA1-	TT22	22	24	103	87933.8	41439.7	13875	383.788	51.9201	193.353	36367	16.4964	100.291	-1.70705	230.113	32.2606	156921	107746	73670.5	2600.13	3061.36	44847.1	10624.3	701.832	283.651	4.16424	2.19184	1	2	0	0	0	SLAM+MEP,SLAM+MEP,
117	export_E5 HSC SC2_Vi0.csv	E5	SC2	Vi	HSC	HSC_SLAM	TT22	22	24	104	160304	112734	2.06434	2313.07	140.704	102.342	49163	105.925	376.22	348.897	397.127	36.013	149502	74804.6	-8.33	1910.7	4090.2	37767.5	14472.4	21976.3	-67.3357	3.37023	-2.10227	1	1	0	0	0	SLAM-HSC,
118	export_E6 HSC SC2_VC0.csv	E6	SC2	VC	HSC	ckit+SCA1-	TT22	22	24	105	144931	102618	14627.5	1117.64	127.461	1734.95	41647.1	87.8589	655.608	127.474	242.987	146.346	170739	64404	53532.2	4416.27	3557.3	27760.8	3434.99	820.738	141.657	4.17513	-0.31344	1	1	0	0	0	GMP,
119	export_E6 HSC SC2_Vi0.csv	E6	SC2	Vi	HSC	HSC_SLAM	TT22	22	24	106	148287	90452.2	1.36827	730.607	128.468	101.52	45742.9	60.7029	71.4854	1180.04	242.968	18.7286	139410	62774.9	-20.23	327.413	5025.55	36195.8	6418.74	15735.2	-97.8192	1.42373	-3.52804	1	1	0	0	0	SLAM-HSC,
120	export_E7 MPP SC3_Vi0.csv	E7	SC3	Vi	MPP	MPP	TT22	22	24	107	145218	116468	1.35274	122.926	466.5	361.104	57282.5	128.579	1172.96	658.336	254.162	180.412	165344	92204.8	5.95	1391.28	6615.96	49772.5	643.121	4088.8	808.806	-2.40808	-2.74626	1	1	0	0	0	MPP,
121	export_E8 MPP SC3_CV1.csv.1	E8	SC3	CV	MPP	MPP	TT22	22	24	108	100018	68603.2	9872.7	88.6521	980.911	584.896	11011.3	81.0431	704.659	291.56	184.414	96.821	146146	77686.8	70493.2	8495.59	2752.6	13711.4	-759.188	11365.9	2374.2	-3.60185	-0.441996	1	2	0	0	0	MPP,MPP,
122	export_E8 MPP SC3_CV1.csv.2	E8	SC3	CV	MPP	MPP	TT22	22	24	108	112556	69999	10036.9	90.4134	964.964	778.829	11020.3	129.034	800.014	236.614	178.949	173.845	146146	77686.8	70493.2	8495.59	2752.6	13711.4	-759.188	11365.9	2374.2	-3.6351	-0.314564	1	2	0	0	0	MPP,MPP,
123	export_E8 MPP SC3_VC0.csv	E8	SC3	VC	MPP	SLAM+Flt3+	TT22	22	24	109	148041	91888.1	14445.4	661.68	1962.58	369.375	39838.7	26.9504	2242.79	2973.45	260.662	80.8011	156530	80885.5	61991.9	7589.68	2338.4	28304.9	1012.27	73098.4	2598.13	-1.94534	-4.41897	1	1	0	0	0	SLAM+FLT3+,
124	export_E8 MPP SC3_Vi0.csv	E8	SC3	Vi	MPP	ckit-	TT22	22	24	110	107031	60280.5	5.12738	292.482	695.082	255.007	32280.9	38.9306	912.569	2838.52	116.136	151.408	242372	136495	-11.9	6309.92	5403.72	60921.7	-1361.78	89316	2048.67	-1.30988	-4.38852	1	1	0	0	0	MPP,
125	export_E9 ST-HSC SC3_VC0.csv	E9	SC3	VC	ST-HSC	HSC_ST	TT22	22	24	111	164287	122889	16588	182.849	139.812	408.897	46530.2	30.4376	2334.57	201.219	419.294	196.354	148547	72312.7	61627.7	7810.72	3636.49	28880.7	1027.15	3864.96	244.579	-2.04538	1.41566	1	1	0	0	0	ST-HSC,
126	export_F1 MPP SC2_CV0.csv	F1	SC2	CV	MPP	MPP	TT22	22	24	112	112770	86936.3	23093.3	59.6562	560.179	218.719	17933.6	122.858	763.04	233.09	784.121	180.838	145804	74445.2	73249.3	6051.29	6267.94	10840.3	313.009	1463.54	1014.23	-2.49636	-0.296388	1	1	0	0	0	MPP,
127	export_F1 MPP SC2_VC0.csv	F1	SC2	VC	MPP	ckit+SCA1-	TT22	22	24	113	100423	58887.3	14886.6	31.0653	802.036	134.308	38326.4	-5.73393	506.664	84.6951	445.931	34.5932	150755	81428.1	55720.6	5546.92	4694.65	27795.6	-512.669	3836.92	1189.84	-2.85752	0.051308	1	1	0	0	0	MEP,
128	export_F1 MPP SC2_Vi0.csv	F1	SC2	Vi	MPP	MPP	TT22	22	24	114	91556.8	62626.1	1.99821	158.796	686.62	288.04	46565.7	53.7646	568.588	468.636	303.832	39.5276	143674	65663	17.85	5789.39	3591.08	36369.3	850.436	14626.5	1204.07	-2.6041	-2.6303	1	1	0	0	0	MPP,
129	export_F10 ST-HSC SC3_CF0.csv	F10	SC3	CF	ST-HSC	HSC_ST	TT22	22	24	115	131480	99897.6	22560	-202.937	276.126	156.418	65.9139	-122.76	50.8321	5580.29	281.077	219.17	150166	87081.8	78556.7	411.761	4924.52	-18.1113	657.241	9248.76	486.635	-1.21793	-2.80283	1	1	0	0	0	ST-HSC,
130	export_F10 ST-HSC SC3_VC1.csv.1	F10	SC3	VC	ST-HSC	HSC_ST	TT22	22	24	116	143906	132922	10944.3	53.5822	176.505	235.311	36514.3	104.233	477.613	477.229	507.499	8.07796	162713	121867	42033.2	547.274	10711.8	46025	713.708	2152.8	411.625	-0.925086	-0.308891	1	2	0	0	0	SLAM+MEP,ST-HSC,
131	export_F10 ST-HSC SC3_VC1.csv.2	F10	SC3	VC	ST-HSC	ckit+SCA1-	TT22	22	24	116	133287	95486.8	10625.1	280.31	144.5	299.086	33167.1	67.0601	280.579	54.881	325.045	219.978	162713	121867	42033.2	547.274	10711.8	46025	713.708	2152.8	411.625	3.11881	1.62195	2	2	0	0	0	SLAM+MEP,ST-HSC,
132	export_F11 HSC SC3_CF0.csv	F11	SC3	CF	HSC	HSC_SLAM	TT22	22	24	117	109334	84338.2	29505.2	1548.87	91.4888	72.0398	31.1374	-50.5934	34.8557	4939.61	194.375	86.3759	153537	99725.6	87372.2	779.226	6910.89	-39.6012	8309.57	9163.39	210.643	1.33404	-5.44001	1	1	0	0	0	SLAM-HSC,
133	export_F11 HSC SC3_CV1.csv	F11	SC3	CV	HSC	ckit+SCA1-	TT22	22	24	118	133309	95808.9	13278.7	1941.74	107.267	83.5816	16105.7	58.221	517.036	54.4287	161.045	139.873	132521	107738	77006.1	8304.47	4271.66	17068	18522.8	817.822	178.896	5.46213	0.122989	1	1	0	0	0	SLAM+MEP,
134	export_F12 HSC SC3_CF0.csv	F12	SC3	CF	HSC	ckit+SCA1-	TT22	22	24	119	133120	105824	16437.9	2003.63	50.2395	688.804	57.686	165.339	1137.66	53.598	234.983	16.4741	164550	115827	94212.3	7054.28	8715.73	-33.3841	11209.3	1457.09	157.561	4.31389	-0.347099	1	1	0	0	0	GMP,
135	export_F12 HSC SC3_VC0.csv	F12	SC3	VC	HSC	ckit-	TT22	22	24	120	131180	87872.1	14621.5	1029.06	75.2187	45.6009	41392.9	68.0867	85.794	635.234	110.542	201.664	136655	57661.5	56253.7	640.724	6087.42	24428.2	12132.6	5403.97	-48.3573	2.84225	-2.37182	1	1	0	0	0	SLAM-HSC,
136	export_F2 MPP SC2_CV0.csv	F2	SC2	CV	MPP	HSC_ST	TT22	22	24	121	143786	128105	23277.6	381.675	348.522	291.183	19661.2	-39.0146	138.754	1250.96	355.189	32.8299	158893	87875.6	69277	1393.13	4950.61	9863.02	2096.04	23752	655.749	-1.48465	-3.76235	1	1	0	0	0	ST-HSC,
137	export_F3 ST-HSC SC2_CF0.csv	F3	SC2	CF	ST-HSC	HSC_ST	TT22	22	24	122	183726	117868	21042.2	120.479	55.7367	53.1631	65.9409	143.234	1697.29	507.905	535.987	140.022	129965	54167.6	61743.2	6059.43	3761.91	-19.5216	1547.58	1477.26	156.634	0.268345	-0.279269	1	1	0	0	0	ST-HSC,
138	export_F3 ST-HSC SC2_CV0.csv	F3	SC2	CV	ST-HSC	HSC_ST	TT22	22	24	123	157744	96060	16708.9	212.417	125.808	455.68	15550.7	114.028	1188.25	292.846	357.843	113.747	158522	85161.2	74253.6	6250.06	4582.32	9806.74	-829.589	7932.85	342.399	-1.97839	1.43878	1	1	0	0	0	ST-HSC,
139	export_F3 ST-HSC SC2_VC0.csv	F3	SC2	VC	ST-HSC	HSC_ST	TT22	22	24	124	109721	99542.9	14397.8	121.042	266.894	80.8249	47867.6	27.2101	1072.78	689.697	393.697	60.529	162020	106162	52256.5	4469.1	8107.94	31983.1	-89.7252	1425.63	528.018	-0.182824	-1.21811	1	1	0	0	0	ST-HSC,
140	export_F4 ST-HSC SC2_CV0.csv	F4	SC2	CV	ST-HSC	ckit+SCA1-	TT22	22	24	125	115423	68346.4	17509	100.71	135.687	119.237	18817.3	88.7055	190.435	47.8521	449.722	114.529	162401	106099	99268.6	2881.44	8149.3	16662.9	371.73	2783.5	223.849	0.710299	2.9029	1	1	0	0	0	MEP,
141	export_F4 ST-HSC SC2_VC0.csv	F4	SC2	VC	ST-HSC	ckit+SCA1-	TT22	22	24	126	96646.1	58331.5	15474.4	121.926	135.126	362.735	41452.5	-14.1838	241.685	49.814	330.244	79.6191	141404	77104.9	41400.1	2758.46	6196.24	24267.4	373.908	519.018	268.517	-1.33636	2.67757	1	1	0	0	0	GMP,
142	export_F5 HSC SC2_CF0.csv	F5	SC2	CF	HSC	ckit+SCA1-	TT22	22	24	127	147498	80480	22769.1	932.616	73.6768	12.9482	28.3116	186.154	45.1782	4.90784	271.285	115.688	148091	61093.4	67619.4	1035.93	5741.12	13.9125	7054.48	1511.41	105.909	5.32507	0.621278	1	1	0	0	0	SLAM+MEP,
143	export_F5 HSC SC2_Vi0.csv	F5	SC2	Vi	HSC	ckit+SCA1-	TT22	22	24	128	169912	128437	0.416198	1356.2	106.977	69.6597	43136	100.14	89.3455	-5.12454	213.466	111.89	170690	101625	41.65	905.389	7668.69	63610.6	21764	497.058	-7.98605	5.61258	0.622269	1	1	0	0	0	SLAM+MEP,
144	export_F6 HSC SC2_VC0.csv	F6	SC2	VC	HSC	ckit-	TT22	22	24	129	96010.6	72370	11640.9	1607.17	227.112	359.504	39763.5	-79.1692	5.70047	1335.61	69.9126	158.626	129317	51842.4	39721	-646.93	4206.93	25396.1	21220.4	19900.1	-34.8577	1.23057	-5.10117	1	1	0	0	0	MyP,
145	export_F6 HSC SC2_Vi0.csv	F6	SC2	Vi	HSC	HSC_SLAM	TT22	22	24	130	132341	120557	1.76532	2372.57	270.295	250.454	42613.2	59.1796	934.455	372.436	226.493	48.6449	154808	84819.6	0	7346.49	5335.44	42317.1	14683.6	42512.3	-56.1584	3.251	-2.3423	1	1	0	0	0	SLAM-HSC,
146	export_F8 MPP SC3_CV0.csv	F8	SC3	CV	MPP	MPP	TT22	22	24	131	185492	153286	26952	173.582	501.296	4329.39	27649.1	-101.159	2113.84	169.226	283.763	150.659	150681	78775.6	77060.8	8777.97	2190.46	15248.2	-203.4	11160.2	2020.19	-5.24854	2.83506	1	1	0	0	0	MPP,
147	export_F8 MPP SC3_Vi0.csv	F8	SC3	Vi	MPP	MPP	TT22	22	24	132	100510	83044.2	4.139	140.921	940.757	89.4272	33541.9	217.648	1149.45	185.279	162.777	198.723	192715	89734.3	-1.19	10448.6	3990.8	55681.9	803.792	2146	2641.19	-2.82586	-0.596947	1	1	0	0	0	MPP,
148	export_F9 ST-HSC SC3_CF0.csv	F9	SC3	CF	ST-HSC	HSC_SLAM	TT22	22	24	133	127318	84771.2	22449.5	1060.99	121.93	68.5175	37.593	63.3065	426.382	1048.72	141.788	187.614	128731	70844.3	69189	564.855	5226.18	-8.92712	-59.3545	2869.69	286.865	1.5828	-3.41485	1	1	0	0	0	SLAM-HSC,
149	export_G1 MPP SC2_CF0.csv	G1	SC2	CF	MPP	ckit-	TT22	22	24	134	111488	64005.2	20080.7	59.4185	305.359	939.454	36.3736	107.351	560.436	43.7556	109.309	150.946	119264	96624.4	111317	6427.98	2413.43	-26.1594	1.9321	500.897	816.527	-2.90669	1.08119	1	1	0	0	0	MyP,
150	export_G1 MPP SC2_CV0.csv	G1	SC2	CV	MPP	MPP	TT22	22	24	135	104035	66516.6	15910.1	104.096	792.232	86.7943	15835.7	163.457	1238.02	319.039	349.126	106.06	141302	70615.8	67494.4	6508.86	3478.56	9591.29	453.9	22968.3	977.885	-2.58443	-0.969358	1	1	0	0	0	MPP,
151	export_G1 MPP SC2_Vi0.csv	G1	SC2	Vi	MPP	MPP	TT22	22	24	136	126733	76770.5	1.14754	67.1164	1498.11	340.132	49441.9	93.3588	707.745	155.587	478.352	61.9821	172775	71887.9	23.8	5248.81	5851.54	40559.8	266.338	1628.01	1709.13	-3.28638	-0.713872	1	1	0	0	0	MPP,
152	export_G11 HSC SC3_CV1.csv.1	G11	SC3	CV	HSC	HSC_ST	TT22	22	24	137	154101	108556	12157.8	186.377	117.777	117.622	13975.6	178.229	1420.74	200.573	427.036	106.371	152005	89833.1	78828	6796.42	7465.37	13494.3	4864.64	550.218	74.0888	0.823294	0.365462	1	2	0	0	0	SLAM+MEP,ST-HSC,
153	export_G11 HSC SC3_CV1.csv.2	G11	SC3	CV	HSC	ckit+SCA1-	TT22	22	24	137	141012	95876.8	12493.1	353.338	85.789	118.077	15118.7	151.67	1534.91	128.619	325.767	129.379	152005	89833.1	78828	6796.42	7465.37	13494.3	4864.64	550.218	74.0888	2.11222	-0.0920038	2	2	0	0	0	SLAM+MEP,ST-HSC,
154	export_G11 HSC SC3_VC0.csv	G11	SC3	VC	HSC	HSC_SLAM	TT22	22	24	138	125054	95990.2	14508	4728.59	51.027	583.39	37107.2	-280.17	3.82941	4195.01	5984.08	126.081	150178	60920.9	64035.1	313.112	4905.15	26738.4	18789.2	14755.6	1.72777	1.38711	-5.88469	1	1	0	0	0	SLAM-HSC,
155	export_G12 HSC SC3_CV0.csv	G12	SC3	CV	HSC	ckit+SCA1-	TT22	22	24	139	153310	130603	24583.7	830.904	60.813	93.6777	24036	155.854	829.231	37.8889	235.282	181.09	143234	64937.1	77397.6	4398.03	5645.55	12395.4	6059.33	739.095	17.9694	5.15768	1.03182	1	1	0	0	0	SLAM+MEP,
156	export_G12 HSC SC3_VC0.csv	G12	SC3	VC	HSC	ckit+SCA1-	TT22	22	24	140	156157	113152	19399.3	981.778	115.816	63.2903	50720.4	133.821	494.58	66.4662	390.27	47.3554	162379	81200.8	52594.4	5546.4	3231.55	31383.2	14982	1612.34	116.361	4.50001	0.425178	1	1	0	0	0	SLAM+MEP,
157	export_G12 HSC SC3_Vi1.csv.1	G12	SC3	Vi	HSC	HSC_SLAM	TT22	22	24	141	122869	71379.2	1.62764	632.556	317.109	148.478	31407.3	149.539	789.302	623.582	197.513	59.0635	205751	98733.1	-9.52	8449.87	4795.69	54067.3	6800.11	85333.9	150.781	1.13356	-1.77098	1	2	0	0	0	ST-HSC,SLAM-HSC,
158	export_G12 HSC SC3_Vi1.csv.2	G12	SC3	Vi	HSC	ckit-	TT22	22	24	141	108044	65171.3	4.59701	295.365	235.277	245.463	32125	59.1803	761.269	691.021	117.314	84.6875	205751	98733.1	-9.52	8449.87	4795.69	54067.3	6800.11	85333.9	150.781	0.179567	-1.96175	2	2	0	0	0	ST-HSC,SLAM-HSC,
159	export_G3 ST-HSC SC2_CF0.csv	G3	SC2	CF	ST-HSC	MPP	TT22	22	24	142	135630	91848.3	27045.3	121.933	469.81	15.0543	40.6928	67.0091	337.086	152.957	389.415	3.97689	143691	69293.7	88923.9	1478.49	4573.9	-2.39925	403.938	2416.99	336.382	0.0729082	1.65637	1	1	0	0	0	MPP,
160	export_G3 ST-HSC SC2_CV0.csv	G3	SC2	CV	ST-HSC	ckit+SCA1-	TT22	22	24	143	115145	78855.2	27465.4	103.311	140.308	217.138	18656.7	133.443	367.902	102.58	192.265	40.8048	149037	62586.9	99136.5	2317.23	5935.46	9580.43	232.917	1262.92	-13.8889	-0.963231	2.39023	1	1	0	0	0	MEP,
161	export_G3 ST-HSC SC2_VC0.csv	G3	SC2	VC	ST-HSC	MPP	TT22	22	24	144	126600	84719.1	22681.3	-30.2307	820.255	501.5	57245.7	53.2296	740.841	514.345	708.961	41.5019	176317	94348	89336.9	8419.84	6751.78	34872.3	-131.826	804.714	624.302	-3.00293	-1.50446	1	1	0	0	0	MPP,
162	export_G3 ST-HSC SC2_Vi0.csv	G3	SC2	Vi	ST-HSC	ckit+SCA1-	TT22	22	24	145	173450	94927.9	1.16687	19.3664	129.287	263.49	62709.9	112.905	167.983	41.4156	524.703	4.05781	161649	87998.1	-20.23	3512.95	8556.2	46452	310.068	622.647	58.7436	-1.4492	3.03421	1	1	0	0	0	MEP,
163	export_G4 ST-HSC SC2_CV1.csv	G4	SC2	CV	ST-HSC	ckit+SCA1-	TT22	22	24	146	123258	61694.9	11783	71.1778	142.237	712.497	14606.4	85.0947	494.029	43.2813	317.845	146.009	142523	117321	51337.8	4577.29	8994.06	18738.5	-627.914	579.765	557.724	-2.85418	3.07049	1	1	0	0	0	GMP,
164	export_G4 ST-HSC SC2_Vi1.csv.1	G4	SC2	Vi	ST-HSC	ckit+SCA1-	TT22	22	24	147	119021	75508.5	2.19248	88.9951	136.746	161.759	30308.6	48.5909	288.65	117.833	411.857	13.0273	194242	101185	-8.33	3198.95	6437.43	48803.7	2248.53	1127.51	53.7825	0.288576	1.50166	1	2	0	0	0	MEP,MEP,
165	export_G4 ST-HSC SC2_Vi1.csv.2	G4	SC2	Vi	ST-HSC	ckit+SCA1-	TT22	22	24	147	114731	53187.3	1.02921	90.6708	143.21	136.54	29117.3	106.848	319.775	134.162	364.64	74.1977	194242	101185	-8.33	3198.95	6437.43	48803.7	2248.53	1127.51	53.7825	0.358814	1.40906	1	2	0	0	0	MEP,MEP,
166	export_G5 HSC SC2_CF1.csv.1	G5	SC2	CF	HSC	ckit+SCA1-	TT22	22	24	148	131398	88486.1	19786.6	1403.09	58.0543	48.3876	55.7601	74.832	372.952	58.0221	178.565	40.9771	170124	86357.1	106169	5370.2	6093.49	-72.0814	24015.5	2934.43	179.929	5.51104	0.269021	1	2	0	0	0	ckit-,SLAM+MEP,
167	export_G5 HSC SC2_CF1.csv.2	G5	SC2	CF	HSC	ckit-	TT22	22	24	148	149258	77415	21037.1	1695.06	99.3356	-55.5894	91.0308	161.735	382.29	35.3445	123.125	72.2786	170124	86357.1	106169	5370.2	6093.49	-72.0814	24015.5	2934.43	179.929	5.55003	0.355519	2	2	0	0	0	ckit-,SLAM+MEP,
168	export_G5 HSC SC2_VC0.csv	G5	SC2	VC	HSC	ckit+SCA1-	TT22	22	24	149	110016	65992	13167.8	509.858	122.944	267.092	37023.2	-3.52231	272.75	84.6212	479.822	84.8627	184137	127185	87775.6	2790.64	9265.01	41282.4	9990.56	12735.4	23.4437	3.53851	0.988647	1	1	0	0	0	SLAM+MEP,
169	export_G6 HSC SC2_VC0.csv	G6	SC2	VC	HSC	ckit+SCA1-	TT22	22	24	150	136660	96924.7	18972.2	374.986	118.13	229.69	58770.8	-25.2274	117.511	132.436	469.757	8.00316	165304	76999	70317.1	390.846	4826.9	30038.4	5622.36	9395.34	140.081	3.11253	1.03859	1	1	0	0	0	SLAM+MEP,
170	export_G7 MPP SC3_VC1.csv.1	G7	SC3	VC	MPP	MPP	TT22	22	24	151	114455	82127.6	11047.4	314.412	659.061	444.919	29894.4	-27.1543	1192.97	1752.85	295.801	127.404	242554	123146	91073.1	8675.14	3922.81	51430.7	723.527	67584.4	2886.56	-1.89528	-4.03138	1	2	0	0	0	MPP,MPP,
171	export_G7 MPP SC3_VC1.csv.2	G7	SC3	VC	MPP	MPP	TT22	22	24	151	119534	75071.1	12854.4	212.873	710.663	346.727	34227.1	-18.4259	1205.07	1956.5	243.442	135.451	242554	123146	91073.1	8675.14	3922.81	51430.7	723.527	67584.4	2886.56	-1.80017	-3.91015	1	2	0	0	0	MPP,MPP,
172	export_G7 MPP SC3_Vi0.csv	G7	SC3	Vi	MPP	MPP	TT22	22	24	152	141628	100854	4.55246	345.066	1024.01	460.368	39746.7	-7.28416	1340	1766.9	384.917	148.494	127654	136927	-38.08	9685.47	4324.21	67690.1	1810.18	42764	2442.66	-1.96938	-4.13761	1	1	0	0	0	MPP,
173	export_G8 MPP SC3_VC0.csv	G8	SC3	VC	MPP	HSC_ST	TT22	22	24	153	150532	99006.8	10393.9	117.664	331.869	935.839	32641.2	45.626	1303.38	247.44	314.979	86.3831	177005	114622	88171.9	5170.57	5490.36	42306.4	1561.22	7650.35	1655.7	-2.72917	0.930338	1	1	0	0	0	ST-HSC,
174	export_G8 MPP SC3_Vi0.csv	G8	SC3	Vi	MPP	MPP	TT22	22	24	154	121717	81735.9	2.40763	279.406	750.147	189.474	48182.2	66.1772	1787.68	316.282	597.303	99.8066	155166	101261	-3.57	4795.1	5785.99	41631.9	-258.988	1266.83	714.832	-2.3002	-0.960143	1	1	0	0	0	MPP,
175	export_G9 ST-HSC SC3_CF0.csv	G9	SC3	CF	ST-HSC	HSC_SLAM	TT22	22	24	155	191944	136689	23838.8	1340.51	203.459	92.3932	142.084	137.765	1277.82	783.961	395.991	158.453	133906	74776	75025.9	1942.93	6765.73	-14.5133	-371.271	1846.52	218.49	2.26415	-3.15793	1	1	0	0	0	SLAM-HSC,
176	export_H10 ST-HSC SC3_CV0.csv	H10	SC3	CV	ST-HSC	HSC_ST	TT22	22	24	156	154959	123920	16623	295.213	177.952	82.8682	17773.8	174.349	901.745	599.075	208.087	57.2065	139263	55150.6	59295.3	2914.37	5480.28	9865.94	264.196	28065.5	237.356	0.582891	-1.69179	1	1	0	0	0	ST-HSC,
177	export_H10 ST-HSC SC3_Vi0.csv	H10	SC3	Vi	ST-HSC	HSC_ST	TT22	22	24	157	132774	86935.2	2.22889	140.217	167.434	192.242	44454.7	183.262	1636.08	196.256	328.632	174.338	142151	70951.4	-23.8	5724.74	4723.64	44768.7	276.666	4128	636.509	-0.0947635	0.630998	1	1	0	0	0	ST-HSC,
178	export_H11 HSC SC3_CV0.csv	H11	SC3	CV	HSC	HSC_SLAM	TT22	22	24	158	162874	101199	23820.8	2434.36	61.8425	183.567	19763.8	92.3363	296.314	310.158	290.427	86.1489	142748	67026.8	78814.9	2637.33	3914.74	10477.8	8849.67	18966.6	205.13	3.48489	-2.09887	1	1	0	0	0	SLAM-HSC,
179	export_H11 HSC SC3_Vi1.csv	H11	SC3	Vi	HSC	ckit+SCA1-	TT22	22	24	159	87167.6	46229.9	1.12346	206.299	73.2743	112.146	18542.7	43.03	31.943	41.7975	164.104	190.121	202577	99344.8	9.52	2005.73	9117.42	67174.8	9924.93	1358.61	-94.5719	3.38447	3.11344	1	1	0	0	0	SLAM+MEP,
180	export_H12 HSC SC3_CF1.csv	H12	SC3	CF	HSC	ckit+SCA1-	TT22	22	24	160	128615	129944	12568.4	1200.31	112.343	275.958	94.7413	124.072	1842.89	101.909	293.253	163.523	161421	75638.8	83626.1	6223.09	6107.17	-47.5937	12038.4	566.915	-5.14114	4.18626	-0.434642	1	1	0	0	0	SLAM+MEP,
181	export_H12 HSC SC3_VC0.csv	H12	SC3	VC	HSC	HSC_SLAM	TT22	22	24	161	111323	79548.4	15511.3	567.419	62.0995	245.333	42035.9	-129.24	43.6866	905.792	367.131	139.978	156251	61542	61233.8	611.374	8623.48	25141.6	4544.36	1825.12	28.9486	1.41835	-3.06895	1	1	0	0	0	SLAM-HSC,
182	export_H12 HSC SC3_Vi0.csv	H12	SC3	Vi	HSC	HSC_SLAM	TT22	22	24	162	139271	117919	0.293643	724.644	250.129	205.792	66413.8	47.0055	889.533	1792.93	314.038	194.064	152369	76732.4	22.61	1252.61	7246.51	46199	3834.59	27371.5	78.4077	0.342502	-4.62476	1	1	0	0	0	SLAM-HSC,
183	export_H2 MPP SC2_CV0.csv	H2	SC2	CV	MPP	MPP	TT22	22	24	163	125191	96797.1	27392.2	58.3588	827.807	305.96	26850	67.1489	434.134	189.396	491.483	45.1439	167217	99225.8	99898.1	2683.78	4892.53	13701	-41.3425	7122.13	959.349	-3.18931	-0.648362	1	1	0	0	0	MPP,
184	export_H3 ST-HSC SC2_CF0.csv	H3	SC2	CF	ST-HSC	HSC_ST	TT22	22	24	164	143765	99885	25256.9	57.2784	156.585	315.555	110.591	100.867	767.409	297.981	994.162	133.535	134252	80426.2	88845.4	8122.35	7779.66	-21.7473	-2.25424	511.248	463.773	-1.42574	0.301284	1	1	0	0	0	ST-HSC,
185	export_H3 ST-HSC SC2_CV0.csv	H3	SC2	CV	ST-HSC	ckit+SCA1-	TT22	22	24	165	157340	131731	23928.5	68.7431	230.447	2555.89	18029	419.229	922.261	49.605	661.443	57.6498	181241	68776.1	94351.5	6482.93	5552.14	12020.7	147.609	2444.33	558.341	-4.34202	3.22858	1	1	0	0	0	GMP,
186	export_H3 ST-HSC SC2_VC0.csv	H3	SC2	VC	ST-HSC	HSC_ST	TT22	22	24	166	136396	101608	12973.7	72.4449	293.132	421.974	37652.3	17.4186	607.924	168.669	396.842	132.379	144616	75503.1	46100.6	1361.99	6969.31	22782.1	694.295	1800.79	294.045	-2.24289	0.959996	1	1	0	0	0	ST-HSC,
187	export_H3 ST-HSC SC2_Vi0.csv	H3	SC2	Vi	ST-HSC	ckit+SCA1-	TT22	22	24	167	116666	68800.7	0.769572	80.8114	251.392	69.996	43254.3	77.1299	327.321	125.344	300.284	78.9512	211202	110356	91.63	1744.49	8706.69	60380.7	832.577	15173.8	452.296	0.182257	1.77492	1	1	0	0	0	MEP,
188	export_H5 HSC SC2_VC1.csv	H5	SC2	VC	HSC	ckit+SCA1-	TT22	22	24	168	125978	54135.9	8607.72	1190.91	132.743	72.3946	19400.2	34.8968	308.482	41.5363	194.039	28.8984	165073	77741.5	54798.3	5502.47	5954.66	26874.1	18770.7	2470.87	104.647	5.64446	0.544156	1	1	0	0	0	SLAM+MEP,
189	export_H5 HSC SC2_Vi0.csv	H5	SC2	Vi	HSC	ckit+SCA1-	TT22	22	24	169	171145	137742	1.7803	3228.68	80.3347	78.242	39767.2	164.384	423.1	6.47389	304.513	149.228	218456	124606	4.76	4466.27	8577.43	67890.4	40322.4	3994.58	-84.3966	5.43396	0.175992	1	1	0	0	0	SLAM+MEP,
190	export_H6 HSC SC2_CF1.csv.1	H6	SC2	CF	HSC	ckit+SCA1-	TT22	22	24	170	91296.3	44491.3	11260.6	135.234	73.3672	56.6191	27.1448	101.093	393.438	32.4465	210.672	18.3944	148377	71103.7	77152.5	4457.13	9292.85	-12.7007	4746.57	535.932	-38.6808	2.51758	3.28311	1	2	0	0	0	MEP,MEP,
191	export_H6 HSC SC2_CF1.csv.2	H6	SC2	CF	HSC	ckit+SCA1-	TT22	22	24	170	102249	55693.1	11148.1	163.568	68.9733	99.74	39.4815	88.658	470.276	98.8721	403.345	41.1711	148377	71103.7	77152.5	4457.13	9292.85	-12.7007	4746.57	535.932	-38.6808	1.2541	2.65288	1	2	0	0	0	MEP,MEP,
192	export_H6 HSC SC2_CV0.csv	H6	SC2	CV	HSC	HSC_ST	TT22	22	24	171	120832	70794.5	24438.2	384.388	106.247	66.3749	26031.3	44.5833	57.1774	1584.1	335.928	3.59104	145117	74983.1	63571	330.721	5391.04	12877.9	3018.01	4744.21	-118.305	0.911051	-3.46688	1	1	0	0	0	ST-HSC,
193	export_H9 ST-HSC SC3_CF0.csv	H9	SC3	CF	ST-HSC	HSC_SLAM	TT22	22	24	172	125641	85152.5	23506.1	592.482	239.08	129.152	60.5979	52.207	76.6765	3543.84	241.314	28.0527	140722	68417.9	74626.1	131.29	6575.36	-47.8454	14.1814	21786.6	135.158	0.0620767	-4.72086	1	1	0	0	0	SLAM-HSC,
194	export_H9 ST-HSC SC3_CV0.csv	H9	SC3	CV	ST-HSC	HSC_SLAM	TT22	22	24	173	158781	113413	16119.8	539.647	187.815	132.468	16322.9	109.462	1190.7	346.489	294.906	127.825	138286	59588.1	46053	1865.33	6739.41	9308.35	-80.3428	2560.1	320.976	2.41063	-1.13348	1	1	0	0	0	SLAM-HSC,
195	export_H9 ST-HSC SC3_Vi0.csv	H9	SC3	Vi	ST-HSC	HSC_ST	TT22	22	24	174	99109.4	90166.7	5.8933	348.743	306.576	687.195	48555.5	175.926	2168.7	373.044	260.538	40.768	141443	63885.2	22.61	4808	3170.97	39001.8	1537.42	11274.4	535.425	-1.39378	-1.32114	1	1	0	0	0	ST-HSC,
196	export_A1 MPP SC2_CV1.csv	A1	SC2	CV	MPP	MPP	TT22	22	48	175	86852.6	55535.1	9247.28	141.002	1022.29	345.209	9265.22	54.9914	55.0017	158.6	380.461	192.987	148174	64770.5	69532.9	5936.01	3619.52	9316.79	-121.487	9782.6	1138.36	-3.33168	-0.542639	1	1	0	0	0	MPP,
197	export_A1 MPP SC2_Vi1.csv.1	A1	SC2	Vi	MPP	MPP	TT22	22	48	176	109629	69427.2	4.8425	77.4317	699.72	249.717	20119.4	7.81621	78.1849	123.778	755.698	97.9477	172527	89479.7	70.21	5783.12	3643.47	46930.9	430.693	3845.81	1871.76	-2.86505	0.0538353	1	2	0	0	0	MPP,MPP,
198	export_A1 MPP SC2_Vi1.csv.2	A1	SC2	Vi	MPP	MPP	TT22	22	48	176	91258.1	74283.9	4.27414	89.9951	432.769	850.509	20431.2	-5.57612	65.0041	153.006	578.644	211.521	172527	89479.7	70.21	5783.12	3643.47	46930.9	430.693	3845.81	1871.76	-3.72616	0.449972	1	2	0	0	0	MPP,MPP,
199	export_A10 ST-HSC SC3_CV3.csv.1	A10	SC3	CV	ST-HSC	HSC_ST	TT22	22	48	177	124007	101684	2290.09	57.1725	135.128	390.012	2234.83	77.9067	70.1599	459.492	329.663	31.7619	162939	82314.7	102534	2413.36	6667.91	10858	772.889	5775.58	460.069	-1.07757	-0.433123	1	6	0	0	0	ST-HSC,ST-HSC,
200	export_A10 ST-HSC SC3_CV3.csv.2	A10	SC3	CV	ST-HSC	HSC_ST	TT22	22	48	177	141767	87735.4	2114.34	-21.1678	138.89	1104.31	2130.74	8.99962	49.5556	1393.86	265.878	40.5658	162939	82314.7	102534	2413.36	6667.91	10858	772.889	5775.58	460.069	-1.18583	-2.0519	1	6	0	0	0	ST-HSC,ST-HSC,ST-HSC,
201	export_A10 ST-HSC SC3_CV3.csv.3	A10	SC3	CV	ST-HSC	HSC_ST	TT22	22	48	177	132541	98639.1	2303.99	131.129	146.256	262.907	2280.05	119.482	72.4126	126.631	442.132	71.8562	162939	82314.7	102534	2413.36	6667.91	10858	772.889	5775.58	460.069	-0.407696	0.996692	1	6	0	0	0	ST-HSC,ST-HSC,ST-HSC,ST-HSC,
202	export_A10 ST-HSC SC3_CV3.csv.4	A10	SC3	CV	ST-HSC	HSC_ST	TT22	22	48	177	112987	80677.6	2250.64	-32.7506	157.394	286.213	2108.54	91.5956	88.8439	435.206	327.765	96.68	162939	82314.7	102534	2413.36	6667.91	10858	772.889	5775.58	460.069	-0.983207	-0.501903	1	6	0	0	0	ST-HSC,ST-HSC,ST-HSC,ST-HSC,ST-HSC,
203	export_A10 ST-HSC SC3_CV3.csv.5	A10	SC3	CV	ST-HSC	HSC_ST	TT22	22	48	177	117342	93283.8	2165.5	110.712	98.4715	504.663	2048.41	151.667	62.2324	1293.35	416.525	152.44	162939	82314.7	102534	2413.36	6667.91	10858	772.889	5775.58	460.069	-0.916713	-1.98832	1	6	0	0	0	ST-HSC,ST-HSC,ST-HSC,ST-HSC,ST-HSC,ST-HSC,
204	export_A10 ST-HSC SC3_CV3.csv.6	A10	SC3	CV	ST-HSC	HSC_ST	TT22	22	48	177	112508	104272	2200.65	145.238	111.819	1132.79	2232.92	72.6653	54.0165	1124.73	319.69	205.793	162939	82314.7	102534	2413.36	6667.91	10858	772.889	5775.58	460.069	-1.19272	-1.67904	1	6	0	0	0	ST-HSC,ST-HSC,ST-HSC,ST-HSC,ST-HSC,ST-HSC,
205	export_A10 ST-HSC SC3_VC4.csv.1	A10	SC3	VC	ST-HSC	ckit+SCA1-	TT22	22	48	178	173978	124944	751.574	123.928	104.11	30411.9	2347.03	-1345.22	7.29304	-39.6993	177.406	45.7792	185891	100350	65212	8846.95	6060	31740	-1360	2073.21	117.218	-6.7184	4.016	1	11	0	0	0	GMP,GMP,
206	export_A10 ST-HSC SC3_VC4.csv.2	A10	SC3	VC	ST-HSC	ckit+SCA1-	TT22	22	48	178	160059	122295	753.197	128.482	138.375	26373.5	2337.67	-1665.59	31.75	-55.7726	150.722	102.664	185891	100350	65212	8846.95	6060	31740	-1360	2073.21	117.218	-6.81777	4.05368	1	11	0	0	0	GMP,GMP,GMP,
207	export_A10 ST-HSC SC3_VC4.csv.3	A10	SC3	VC	ST-HSC	ckit+SCA1-	TT22	22	48	178	158563	118802	710.641	125.266	84.0254	21334.7	2138.82	-491.044	11.1464	9.31357	205.964	110.561	185891	100350	65212	8846.95	6060	31740	-1360	2073.21	117.218	-6.36244	3.92198	1	11	0	0	0	MyP,GMP,GMP,GMP,
208	export_A10 ST-HSC SC3_VC4.csv.4	A10	SC3	VC	ST-HSC	ckit-	TT22	22	48	178	141998	103641	708.576	114.563	99.8525	21815.5	2139.4	9.38692	-35.0361	-95.2312	142.917	152.255	185891	100350	65212	8846.95	6060	31740	-1360	2073.21	117.218	-6.77498	4.12641	2	11	0	0	0	MyP,MyP,GMP,GMP,GMP,
209	export_A10 ST-HSC SC3_VC4.csv.5	A10	SC3	VC	ST-HSC	ckit-	TT22	22	48	178	171224	145108	763.428	237.365	117.807	26929.8	2315.32	-1525.84	30.3952	-13.1096	113.257	160.277	185891	100350	65212	8846.95	6060	31740	-1360	2073.21	117.218	-6.67206	3.94281	2	11	0	0	0	GMP,MyP,MyP,GMP,GMP,GMP,
210	export_A10 ST-HSC SC3_VC4.csv.6	A10	SC3	VC	ST-HSC	ckit+SCA1-	TT22	22	48	178	144163	95063.6	681.986	50.1082	106.802	21487.7	2045.87	742.322	-50.4804	23.0631	265.25	167.134	185891	100350	65212	8846.95	6060	31740	-1360	2073.21	117.218	-6.29279	3.81224	3	11	0	0	0	GMP,GMP,MyP,MyP,GMP,GMP,GMP,
211	export_A10 ST-HSC SC3_VC4.csv.7	A10	SC3	VC	ST-HSC	ckit+SCA1-	TT22	22	48	178	134555	99112.5	728.565	49.0904	110.688	22482	2103.18	840.18	-56.7342	68.7142	193.194	183.873	185891	100350	65212	8846.95	6060	31740	-1360	2073.21	117.218	-6.29297	3.77178	3	11	0	0	0	GMP,GMP,GMP,MyP,MyP,GMP,GMP,GMP,
212	export_A10 ST-HSC SC3_VC4.csv.8	A10	SC3	VC	ST-HSC	ckit+SCA1-	TT22	22	48	178	150297	110636	734.722	196.197	155.802	33461.5	2111.37	887.219	-78.88	-69.7862	190.235	188.297	185891	100350	65212	8846.95	6060	31740	-1360	2073.21	117.218	-6.80116	4.08224	3	11	0	0	0	MyP,GMP,GMP,GMP,MyP,MyP,GMP,GMP,GMP,
213	export_A10 ST-HSC SC3_VC4.csv.9	A10	SC3	VC	ST-HSC	ckit-	TT22	22	48	178	153966	126759	747.603	83.1778	92.4177	11850.3	2284.69	-590.784	65.7974	-2.95469	124.478	200.654	185891	100350	65212	8846.95	6060	31740	-1360	2073.21	117.218	-6.21687	4.01111	4	11	0	0	0	GMP,MyP,GMP,GMP,GMP,MyP,MyP,GMP,GMP,GMP,
214	export_A10 ST-HSC SC3_VC4.csv.10	A10	SC3	VC	ST-HSC	ckit+SCA1-	TT22	22	48	178	162720	137168	764.801	18.0035	97.0183	15698.3	2279.53	160.477	19.8008	40.295	166.137	209.938	185891	100350	65212	8846.95	6060	31740	-1360	2073.21	117.218	-6.2376	3.82794	5	11	0	0	0	MyP,GMP,MyP,GMP,GMP,GMP,MyP,MyP,GMP,GMP,GMP,
215	export_A10 ST-HSC SC3_VC4.csv.11	A10	SC3	VC	ST-HSC	ckit-	TT22	22	48	178	156336	110231	701.23	-5.44363	131.01	18539.3	2044.05	-770.625	53.423	52.5671	80.148	217.729	185891	100350	65212	8846.95	6060	31740	-1360	2073.21	117.218	-6.22385	3.80259	6	11	0	0	0	MyP,GMP,MyP,GMP,GMP,GMP,MyP,MyP,GMP,GMP,GMP,
216	export_A10 ST-HSC SC3_Vi2.csv.1	A10	SC3	Vi	ST-HSC	ckit+SCA1-	TT22	22	48	179	151669	121597	9.98136	217.545	144.558	149.722	7640.42	192.886	81.2168	8.95668	460.221	95.7692	145136	75955.3	14.28	1499.8	6455.7	35076.4	893.577	1924.91	225.463	2.57078	2.43636	1	3	0	0	0	SLAM+MEP,SLAM+MEP,
217	export_A10 ST-HSC SC3_Vi2.csv.2	A10	SC3	Vi	ST-HSC	ckit+SCA1-	TT22	22	48	179	143553	108181	1.61667	214.965	141.461	166.784	8008.71	154.714	68.8238	13.0634	378.577	210.782	145136	75955.3	14.28	1499.8	6455.7	35076.4	893.577	1924.91	225.463	2.63192	2.43295	1	3	0	0	0	MEP,SLAM+MEP,SLAM+MEP,
218	export_A10 ST-HSC SC3_Vi2.csv.3	A10	SC3	Vi	ST-HSC	ckit+SCA1-	TT22	22	48	179	120336	111386	6.96126	193.886	107.364	273.339	8188.13	101.167	74.5934	44.422	356.186	224.647	145136	75955.3	14.28	1499.8	6455.7	35076.4	893.577	1924.91	225.463	3.07172	1.80664	2	3	0	0	0	MEP,SLAM+MEP,SLAM+MEP,
219	export_A11 HSC SC3_CV3.csv.1	A11	SC3	CV	HSC	ckit+SCA1-	TT22	22	48	180	110388	86294.1	1721.31	1526.85	66.1182	99.6647	2385.41	90.6663	42.736	55.6258	231.693	64.7278	118679	91697.8	44776.1	2201.13	4645.57	14416.4	11116	10492.2	322.474	5.27674	0.0585467	1	7	0	0	0	ckit-,SLAM+MEP,
220	export_A11 HSC SC3_CV3.csv.2	A11	SC3	CV	HSC	ckit-	TT22	22	48	180	89868.4	95084.2	2659.09	940.685	94.0973	151.199	3573.11	118.621	60.6654	-16.9762	36.5788	86.7905	118679	91697.8	44776.1	2201.13	4645.57	14416.4	11116	10492.2	322.474	5.26109	1.9991	2	7	0	0	0	ckit-,ckit-,SLAM+MEP,
221	export_A11 HSC SC3_CV3.csv.3	A11	SC3	CV	HSC	ckit-	TT22	22	48	180	96141.3	69053.8	1750.37	884.719	88.6223	107.732	2271.03	76.5425	42.4326	22.94	142.822	137.275	118679	91697.8	44776.1	2201.13	4645.57	14416.4	11116	10492.2	322.474	5.46401	1.35205	2	7	0	0	0	ckit-,ckit-,ckit-,SLAM+MEP,
222	export_A11 HSC SC3_CV3.csv.4	A11	SC3	CV	HSC	ckit-	TT22	22	48	180	85786.4	83871.3	1668.22	688.747	93.4133	67.9055	2173.04	114.824	33.7675	9.07232	130.858	142.821	118679	91697.8	44776.1	2201.13	4645.57	14416.4	11116	10492.2	322.474	5.17132	1.94808	2	7	0	0	0	SLAM+MEP,ckit-,ckit-,ckit-,SLAM+MEP,
223	export_A11 HSC SC3_CV3.csv.5	A11	SC3	CV	HSC	ckit+SCA1-	TT22	22	48	180	139640	82918.7	1781.69	774.302	49.7514	65.4581	2561.8	86.5287	42.6985	41.9796	404.298	154.893	118679	91697.8	44776.1	2201.13	4645.57	14416.4	11116	10492.2	322.474	4.66269	0.721739	3	7	0	0	0	SLAM+MEP,SLAM+MEP,ckit-,ckit-,ckit-,SLAM+MEP,
224	export_A11 HSC SC3_CV3.csv.6	A11	SC3	CV	HSC	ckit+SCA1-	TT22	22	48	180	120714	80193	1918.96	721.965	91.4752	91.8435	2776.24	103.226	37.4296	29.0048	413.157	165.045	118679	91697.8	44776.1	2201.13	4645.57	14416.4	11116	10492.2	322.474	4.6161	1.0568	3	7	0	0	0	SLAM+MEP,SLAM+MEP,SLAM+MEP,ckit-,ckit-,ckit-,SLAM+MEP,
225	export_A11 HSC SC3_CV3.csv.7	A11	SC3	CV	HSC	ckit+SCA1-	TT22	22	48	180	85455	63909.8	1747.77	1227.37	82.1673	71.7805	2274.75	152.964	35.3697	19.6008	169.843	209.146	118679	91697.8	44776.1	2201.13	4645.57	14416.4	11116	10492.2	322.474	5.63371	0.614294	3	7	0	0	0	SLAM+MEP,SLAM+MEP,SLAM+MEP,ckit-,ckit-,ckit-,SLAM+MEP,
226	export_A11 HSC SC3_Vi1.csv.1	A11	SC3	Vi	HSC	HSC_ST	TT22	22	48	181	94033.4	60464.5	-0.097796	-107.627	62.7212	275.867	14106.9	-123.506	-20.805	8558.97	398.9	8.2535	164210	67188.6	-10.71	1019.25	5362.44	36084.5	16454.3	18445.4	107.948	-1.09262	-2.87279	1	2	0	0	0	SLAM-HSC,ST-HSC,
227	export_A11 HSC SC3_Vi1.csv.2	A11	SC3	Vi	HSC	HSC_SLAM	TT22	22	48	181	99171.2	66668.2	-0.329437	420.471	64.2365	278.505	15759.4	-382.025	-14.8354	8831.74	265.217	114.919	164210	67188.6	-10.71	1019.25	5362.44	36084.5	16454.3	18445.4	107.948	0.406986	-5.09844	2	2	0	0	0	SLAM-HSC,ST-HSC,
228	export_A12 HSC SC3_VC3.csv.1	A12	SC3	VC	HSC	ckit-	TT22	22	48	182	161036	113155	1855.62	597.162	86.7012	230.213	5903.65	217.364	93.7263	5.86912	106.36	40.9663	158827	82849	62132.3	9995.05	3576.57	41885.6	11065.6	1849.86	162.837	4.99946	1.9292	1	6	0	0	0	SLAM+MEP,ckit-,
229	export_A12 HSC SC3_VC3.csv.2	A12	SC3	VC	HSC	ckit+SCA1-	TT22	22	48	182	144837	101753	2135.49	617.927	95.3089	194.743	6460.88	126.156	71.2933	-0.348083	153.056	65.1916	158827	82849	62132.3	9995.05	3576.57	41885.6	11065.6	1849.86	162.837	5.05483	1.8353	2	6	0	0	0	ckit-,SLAM+MEP,ckit-,
230	export_A12 HSC SC3_VC3.csv.3	A12	SC3	VC	HSC	ckit-	TT22	22	48	182	171154	138204	1841.36	1431.71	67.205	135.469	5929.03	300.841	47.7909	-5.65675	107.448	114.3	158827	82849	62132.3	9995.05	3576.57	41885.6	11065.6	1849.86	162.837	5.75041	0.935179	3	6	0	0	0	SLAM+MEP,ckit-,SLAM+MEP,ckit-,
231	export_A12 HSC SC3_VC3.csv.4	A12	SC3	VC	HSC	ckit+SCA1-	TT22	22	48	182	147803	139351	2069.81	2085.27	57.2855	174.91	6585	134.601	59.2516	-1.93617	175.158	136.073	158827	82849	62132.3	9995.05	3576.57	41885.6	11065.6	1849.86	162.837	5.69177	0.820077	4	6	0	0	0	SLAM+MEP,SLAM+MEP,ckit-,SLAM+MEP,ckit-,
232	export_A12 HSC SC3_VC3.csv.5	A12	SC3	VC	HSC	ckit+SCA1-	TT22	22	48	182	155289	128842	1938.05	212.699	147.929	114.999	6039.74	182.019	75.7887	-8.97974	255.396	136.885	158827	82849	62132.3	9995.05	3576.57	41885.6	11065.6	1849.86	162.837	3.05153	2.89764	4	6	0	0	0	ckit-,SLAM+MEP,SLAM+MEP,ckit-,SLAM+MEP,ckit-,
233	export_A12 HSC SC3_VC3.csv.6	A12	SC3	VC	HSC	ckit-	TT22	22	48	182	168446	113224	1816.8	166.168	92.7061	83.7353	6123.3	187.507	91.1242	-5.3533	128.371	199.608	158827	82849	62132.3	9995.05	3576.57	41885.6	11065.6	1849.86	162.837	3.8353	3.61317	5	6	0	0	0	ckit-,SLAM+MEP,SLAM+MEP,ckit-,SLAM+MEP,ckit-,
234	export_A12 HSC SC3_Vi3.csv.1	A12	SC3	Vi	HSC	ckit+SCA1-	TT22	22	48	183	112648	103898	0.853977	1245.42	78.1082	117.814	5247.21	103.9	60.1668	-16.4494	210.601	159.53	171444	62604.7	5.95	4680.37	5520.27	45326.1	8224.92	2875.93	-63.9874	5.59991	0.823868	1	3	0	0	0	ckit-,SLAM+MEP,
235	export_A12 HSC SC3_Vi3.csv.2	A12	SC3	Vi	HSC	ckit-	TT22	22	48	183	135227	112680	1.43603	272.046	80.6738	57.705	5110.33	148.718	68.3472	9.22513	106.942	190.639	171444	62604.7	5.95	4680.37	5520.27	45326.1	8224.92	2875.93	-63.9874	4.08367	3.41674	2	3	0	0	0	SLAM+MEP,ckit-,SLAM+MEP,
236	export_A12 HSC SC3_Vi3.csv.3	A12	SC3	Vi	HSC	ckit+SCA1-	TT22	22	48	183	152543	144172	1.97072	583.378	72.823	121.057	5578.13	186.019	78.0913	0.206545	162.222	206.285	171444	62604.7	5.95	4680.37	5520.27	45326.1	8224.92	2875.93	-63.9874	4.9134	2.23886	3	3	0	0	0	SLAM+MEP,ckit-,SLAM+MEP,
237	export_A2 MPP SC2_CV1.csv	A2	SC2	CV	MPP	ckit+SCA1-	TT22	22	48	184	95665.5	52588.3	5995.16	122.909	506.537	113.921	6689.04	78.7792	46.7803	96.2023	735.514	58.7612	130002	55887.2	73563.4	6149.37	3199.38	9787.84	-1100.05	25485.6	832.307	-2.69709	0.154205	1	1	0	0	0	MEP,
238	export_A2 MPP SC2_VC1.csv	A2	SC2	VC	MPP	MPP	TT22	22	48	185	96339.2	72412.8	4950.17	191.202	389.635	310.943	14565.9	48.2404	70.4492	291.997	361.957	149.177	174515	86131	81269.9	2939.7	6170.43	31744.7	-68.6482	2930.93	1141.57	-1.72386	-0.313136	1	1	0	0	0	MPP,
239	export_A2 MPP SC2_Vi0.csv	A2	SC2	Vi	MPP	MPP	TT22	22	48	186	106459	101285	18.4803	65.255	2482.85	224.636	39097.4	91.4099	97.0233	304.268	600.963	83.0881	176390	83423.8	7.14	4769.2	3532.42	48671.1	-193.94	2920.74	3048.02	-3.16931	-1.20259	1	1	0	0	0	MPP,
240	export_A3 ST-HSC SC2_CF1.csv	A3	SC2	CF	ST-HSC	HSC_ST	TT22	22	48	187	115425	96035.9	7784.06	151.757	105.557	263.206	123.14	290.263	48.5682	1842.21	433.299	212.728	152752	74484.5	68713	45.6052	6294.8	-6.98124	401.486	11650	3.03838	-0.6509	-2.38767	1	1	0	0	0	ST-HSC,
241	export_A3 ST-HSC SC2_VC2.csv.1	A3	SC2	VC	ST-HSC	ckit+SCA1-	TT22	22	48	188	105844	61609.8	3101.9	40.8328	173.2	117.366	8927.85	64.4425	55.4867	22.994	464.559	20.4377	151701	72998.2	69034.3	2560.46	4487.91	27065.6	63.8959	9947.53	267.54	-0.0848082	3.18057	1	3	0	0	0	ST-HSC,MEP,
242	export_A3 ST-HSC SC2_VC2.csv.2	A3	SC2	VC	ST-HSC	HSC_ST	TT22	22	48	188	110662	59091.7	3028.39	69.9025	190.998	325.27	9177.87	71.782	53.0192	170.369	453.722	63.4786	151701	72998.2	69034.3	2560.46	4487.91	27065.6	63.8959	9947.53	267.54	-2.13319	1.15778	2	3	0	0	0	MEP,ST-HSC,MEP,
243	export_A3 ST-HSC SC2_VC2.csv.3	A3	SC2	VC	ST-HSC	ckit+SCA1-	TT22	22	48	188	115367	64438	3230.55	43.9683	155.254	173.569	9498.28	71.4082	76.9119	55.8345	680.136	191.58	151701	72998.2	69034.3	2560.46	4487.91	27065.6	63.8959	9947.53	267.54	-0.110377	3.13369	3	3	0	0	0	MEP,ST-HSC,MEP,
244	export_A5 HSC SC2_CF2.csv.1	A5	SC2	CF	HSC	HSC_SLAM	TT22	22	48	189	96538.1	47385.1	5254.84	1335.07	25.6094	143.962	17.0887	-7.50151	20.1245	168.7	413.936	2.55937	110374	91308.7	84286.5	977.515	5551.29	-9.88164	10904.9	6485.61	270.679	3.81272	-1.20961	1	3	0	0	0	SLAM+MEP,SLAM-HSC,
245	export_A5 HSC SC2_CF2.csv.2	A5	SC2	CF	HSC	ckit+SCA1-	TT22	22	48	189	119648	63557	5390.04	1232.55	44.9712	104.545	49.5566	80.1055	24.715	64.4837	289.977	114.825	110374	91308.7	84286.5	977.515	5551.29	-9.88164	10904.9	6485.61	270.679	5.05841	0.0374237	2	3	0	0	0	SLAM-HSC,SLAM+MEP,SLAM-HSC,
246	export_A5 HSC SC2_CF2.csv.3	A5	SC2	CF	HSC	HSC_SLAM	TT22	22	48	189	82064.4	43593	5231.35	1046.43	42.1058	69.5343	28.6381	76.4459	27.4406	109.076	342.841	195.127	110374	91308.7	84286.5	977.515	5551.29	-9.88164	10904.9	6485.61	270.679	4.66432	0.0618925	3	3	0	0	0	SLAM-HSC,SLAM+MEP,SLAM-HSC,
247	export_A5 HSC SC2_Vi2.csv.1	A5	SC2	Vi	HSC	ckit+SCA1-	TT22	22	48	190	92948.8	65470.8	4.01912	48.3668	285.351	484.102	7448.42	51.0022	44.1408	5.98115	465.481	50.4854	206996	160245	-8.33	10413.1	4976.41	50166.6	3418.14	10271.9	525.476	-3.16342	1.4393	1	4	0	0	0	GMP,GMP,
248	export_A5 HSC SC2_Vi2.csv.2	A5	SC2	Vi	HSC	ckit+SCA1-	TT22	22	48	190	98615.1	62926.7	4.07587	138.664	294.019	446.809	7556.42	267.14	57.6049	-3.43381	480.958	107.005	206996	160245	-8.33	10413.1	4976.41	50166.6	3418.14	10271.9	525.476	-2.98586	1.74946	1	4	0	0	0	GMP,GMP,GMP,
249	export_A5 HSC SC2_Vi2.csv.3	A5	SC2	Vi	HSC	ckit+SCA1-	TT22	22	48	190	100122	62252.9	1.09827	45.8064	169.954	453.692	7072.99	91.4456	56.7504	9.78231	643.017	146.358	206996	160245	-8.33	10413.1	4976.41	50166.6	3418.14	10271.9	525.476	-1.88557	3.13986	1	4	0	0	0	GMP,GMP,GMP,GMP,
250	export_A5 HSC SC2_Vi2.csv.4	A5	SC2	Vi	HSC	ckit+SCA1-	TT22	22	48	190	93074.7	46140.3	1.25849	70.4904	174.578	551.196	7877.06	-4.02759	45.6286	26.3132	559.073	180.261	206996	160245	-8.33	10413.1	4976.41	50166.6	3418.14	10271.9	525.476	-2.33928	3.02914	1	4	0	0	0	GMP,GMP,GMP,GMP,
251	export_A6 HSC SC2_CF2.csv	A6	SC2	CF	HSC	ckit+SCA1-	TT22	22	48	191	116339	103360	3933.41	165.025	93.541	78.7602	62.1303	126.201	72.5862	-4.7249	351.185	168.816	125965	87807.7	52991.9	1239.69	3319.71	-21.7933	5889.09	3494.01	321.992	1.83408	3.30201	1	4	0	0	0	MEP,MEP,
252	export_A6 HSC SC2_CF3.csv.1	A6	SC2	CF	HSC	ckit+SCA1-	TT22	22	48	191	107931	64768.5	2046.15	75.1439	86.4471	91.7077	34.8724	86.5135	29.015	-15.7421	217.381	23.0883	125965	87807.7	52991.9	1239.69	3319.71	-21.7933	5889.09	3494.01	321.992	0.828192	3.30498	1	4	0	0	0	MEP,MEP,MEP,
253	export_A6 HSC SC2_CF3.csv.2	A6	SC2	CF	HSC	ckit+SCA1-	TT22	22	48	191	81538.9	62010.9	2126.8	121.197	132.309	69.7228	35.5475	120.076	45.3229	-1.31497	367.996	38.9325	125965	87807.7	52991.9	1239.69	3319.71	-21.7933	5889.09	3494.01	321.992	1.54304	3.31365	1	4	0	0	0	MEP,MEP,MEP,MEP,
254	export_A6 HSC SC2_CF3.csv.3	A6	SC2	CF	HSC	ckit+SCA1-	TT22	22	48	191	73357.2	66096.4	1956.01	153.852	86.3787	67.0048	27.0544	118.61	35.7689	3.32152	260.842	191.531	125965	87807.7	52991.9	1239.69	3319.71	-21.7933	5889.09	3494.01	321.992	2.37073	3.29927	1	4	0	0	0	MEP,MEP,MEP,MEP,
255	export_A6 HSC SC2_CV1.csv.1	A6	SC2	CV	HSC	HSC_SLAM	TT22	22	48	192	107785	79924.1	8322.04	867.226	102.907	136.773	8992	-19.5362	42.7111	4164.69	597.957	11.6491	163941	86829.5	72642.4	821.161	3252.05	12847.7	10125.8	40172.2	34.9369	0.944434	-5.11245	1	2	0	0	0	SLAM-HSC,SLAM-HSC,
256	export_A6 HSC SC2_CV1.csv.2	A6	SC2	CV	HSC	HSC_SLAM	TT22	22	48	192	115752	88793.8	8325.28	602.624	127.505	245.311	8643.47	-91.1636	53.615	3607.55	579.8	61.0304	163941	86829.5	72642.4	821.161	3252.05	12847.7	10125.8	40172.2	34.9369	0.773396	-5.02391	1	2	0	0	0	SLAM-HSC,SLAM-HSC,
257	export_A6 HSC SC2_Vi3.csv.1	A6	SC2	Vi	HSC	ckit+SCA1-	TT22	22	48	193	78151.9	62376.7	1.96891	314.945	63.4332	79.5596	4334.56	70.2658	48.8527	15.3365	342.802	75.7894	153392	61747.9	45.22	1786.63	4102.31	39864.4	15654.1	4783.21	-47.9634	2.62182	2.58682	1	6	0	0	0	SLAM+MEP,SLAM+MEP,
258	export_A6 HSC SC2_Vi3.csv.2	A6	SC2	Vi	HSC	ckit+SCA1-	TT22	22	48	193	126167	79179.4	-0.180353	358.2	104.445	64.6014	4602.76	54.6735	37.2464	43.2222	352.229	119.572	153392	61747.9	45.22	1786.63	4102.31	39864.4	15654.1	4783.21	-47.9634	2.82045	2.50777	1	6	0	0	0	MEP,SLAM+MEP,SLAM+MEP,
259	export_A6 HSC SC2_Vi3.csv.3	A6	SC2	Vi	HSC	ckit+SCA1-	TT22	22	48	193	86329.6	49905.9	3.05905	187.849	90.6472	46.6505	4822.36	97.1613	39.4685	24.3708	309.303	122.746	153392	61747.9	45.22	1786.63	4102.31	39864.4	15654.1	4783.21	-47.9634	2.28898	3.2565	2	6	0	0	0	SLAM+MEP,MEP,SLAM+MEP,SLAM+MEP,
260	export_A6 HSC SC2_Vi3.csv.4	A6	SC2	Vi	HSC	ckit+SCA1-	TT22	22	48	193	103860	76157.3	1.54917	268.87	85.7797	112.147	4835.37	34.0896	30.4557	40.3593	434.068	142.895	153392	61747.9	45.22	1786.63	4102.31	39864.4	15654.1	4783.21	-47.9634	2.68853	2.33032	3	6	0	0	0	SLAM+MEP,SLAM+MEP,MEP,SLAM+MEP,SLAM+MEP,
261	export_A6 HSC SC2_Vi3.csv.5	A6	SC2	Vi	HSC	ckit+SCA1-	TT22	22	48	193	86688.4	63683.9	9.6945	341.343	132.896	91.917	4157.67	85.3558	50.8422	48.4811	203.332	146.379	153392	61747.9	45.22	1786.63	4102.31	39864.4	15654.1	4783.21	-47.9634	3.31917	2.79091	3	6	0	0	0	SLAM+MEP,SLAM+MEP,SLAM+MEP,MEP,SLAM+MEP,SLAM+MEP,
262	export_A6 HSC SC2_Vi3.csv.6	A6	SC2	Vi	HSC	ckit+SCA1-	TT22	22	48	193	123159	75840.8	1.05505	326.599	80.6991	119.67	4751.62	62.7475	63.8955	23.4127	547.587	202.013	153392	61747.9	45.22	1786.63	4102.31	39864.4	15654.1	4783.21	-47.9634	2.70842	2.30532	3	6	0	0	0	SLAM+MEP,SLAM+MEP,SLAM+MEP,MEP,SLAM+MEP,SLAM+MEP,
263	export_A7 MPP SC3_VC1.csv.1	A7	SC3	VC	MPP	SLAM+Flt3+	TT22	22	48	194	135943	134093	5158.63	487.914	336.812	7789.7	15206.6	-469.056	84.8904	486.063	295.699	93.0895	160775	53989.1	70766.9	4272.03	3846.62	25548.8	893.334	3375.59	1522.08	-5.43141	2.83338	1	2	0	0	0	MPP,SLAM+FLT3+,
264	export_A7 MPP SC3_VC1.csv.2	A7	SC3	VC	MPP	MPP	TT22	22	48	194	112423	133635	5087.23	243.232	312.353	7988.79	13634.1	541.532	44.2408	333.314	370.564	212.471	160775	53989.1	70766.9	4272.03	3846.62	25548.8	893.334	3375.59	1522.08	-5.42002	2.8327	2	2	0	0	0	MPP,SLAM+FLT3+,
265	export_A7 MPP SC3_Vi4.csv.1	A7	SC3	Vi	MPP	ckit-	TT22	22	48	195	127679	112202	7.70811	184.56	95.8035	11425.2	2262.52	343.344	30.9306	-59.4257	76.5076	152.685	190516	84292.5	27.37	10486.8	4589.5	45159.3	743.185	3330.87	1092.77	-6.60275	4.19398	1	4	0	0	0	GMP,MyP,
266	export_A7 MPP SC3_Vi4.csv.2	A7	SC3	Vi	MPP	ckit+SCA1-	TT22	22	48	195	186541	161670	0.178659	101.699	100.154	12760.8	2374.94	22.3407	57.9934	9.92776	158.154	184.989	190516	84292.5	27.37	10486.8	4589.5	45159.3	743.185	3330.87	1092.77	-6.21336	4.00077	2	4	0	0	0	MyP,GMP,MyP,
267	export_A7 MPP SC3_Vi4.csv.3	A7	SC3	Vi	MPP	ckit-	TT22	22	48	195	134931	145788	6.35266	158.823	165.116	13696.8	2413.09	-419.871	52.2112	-97.3393	141.175	196.526	190516	84292.5	27.37	10486.8	4589.5	45159.3	743.185	3330.87	1092.77	-6.79713	4.13493	3	4	0	0	0	MyP,MyP,GMP,MyP,
268	export_A7 MPP SC3_Vi4.csv.4	A7	SC3	Vi	MPP	ckit-	TT22	22	48	195	151867	157179	2.01596	160.02	90.1579	14453.6	2511.16	-288.43	51.7759	5.39867	118.823	203.098	190516	84292.5	27.37	10486.8	4589.5	45159.3	743.185	3330.87	1092.77	-6.36582	4.0031	3	4	0	0	0	MyP,MyP,GMP,MyP,
269	export_A8 MPP SC3_CF2.csv.1	A8	SC3	CF	MPP	HSC_ST	TT22	22	48	196	124222	92424.2	3295.05	13.5986	256.652	389.544	52.0119	-12.5113	72.0258	1772.04	226.294	2.76217	138128	71169.1	72335.3	5064.48	4245.52	-5.46209	420.775	10142.8	1167.32	-1.21197	-2.38434	1	2	0	0	0	SLAM-HSC,MPP,
270	export_A8 MPP SC3_CF2.csv.2	A8	SC3	CF	MPP	HSC_SLAM	TT22	22	48	196	97156.9	114315	3113.14	418.867	195.665	736.366	91.7909	26.7518	65.9622	649.179	177.578	160.274	138128	71169.1	72335.3	5064.48	4245.52	-5.46209	420.775	10142.8	1167.32	-1.24295	-1.57841	2	2	0	0	0	SLAM-HSC,MPP,
271	export_A8 MPP SC3_CV3.csv.1	A8	SC3	CV	MPP	MPP	TT22	22	48	197	129814	78973.7	2596.78	-30.5509	438.122	4979.25	2929.81	88.622	49.7486	174.98	339.873	134.419	148584	76233.8	58062.5	4581.69	4815.51	9646.26	640.384	1517.26	1336.07	-4.8958	3.08696	1	2	0	0	0	MPP,MPP,
272	export_A8 MPP SC3_CV3.csv.2	A8	SC3	CV	MPP	MPP	TT22	22	48	197	134167	78396.5	2678.61	-37.7491	433.107	5648.25	2943.77	-15.4976	40.2356	182.438	302.457	194.229	148584	76233.8	58062.5	4581.69	4815.51	9646.26	640.384	1517.26	1336.07	-4.96043	3.10204	1	2	0	0	0	MPP,MPP,
273	export_A8 MPP SC3_VC1.csv	A8	SC3	VC	MPP	MPP	TT22	22	48	198	139249	94638.2	7575	-892.114	864.012	566.825	18872.2	-242.074	88.0957	10185.2	319.793	183.22	174796	95521.3	51878.1	1253.2	3822.87	29107.4	-783.098	37601.5	850.564	-1.55167	-2.67952	1	1	0	0	0	MPP,
274	export_A8 MPP SC3_Vi4.csv.1	A8	SC3	Vi	MPP	ckit-	TT22	22	48	199	102060	94626.2	8.46643	89.7451	98.9355	8232.38	2296.79	-642.883	47.8366	35.6964	135.944	10.1599	129187	72742.3	-13.09	3596.52	4261.74	38781.1	1724.77	1601.78	1302.93	-5.98238	4.07408	1	3	0	0	0	MyP,MyP,
275	export_A8 MPP SC3_Vi4.csv.2	A8	SC3	Vi	MPP	ckit-	TT22	22	48	199	102862	89602.6	-0.263134	50.6893	89.6049	8961.17	2200.27	-165.054	12.4408	3.4429	71.7972	62.2904	129187	72742.3	-13.09	3596.52	4261.74	38781.1	1724.77	1601.78	1302.93	-6.01044	4.04935	1	3	0	0	0	GMP,MyP,MyP,
276	export_A8 MPP SC3_Vi4.csv.3	A8	SC3	Vi	MPP	ckit+SCA1-	TT22	22	48	199	103087	86743	5.03954	66.0247	58.1474	8861.06	2297.56	-487.21	48.2946	1.89736	158.482	216.942	129187	72742.3	-13.09	3596.52	4261.74	38781.1	1724.77	1601.78	1302.93	-6.06088	4.04112	2	3	0	0	0	GMP,MyP,MyP,
277	export_A9 ST-HSC SC3_CF1.csv	A9	SC3	CF	ST-HSC	HSC_SLAM	TT22	22	48	200	139873	138343	9047.03	347.257	250.58	584.338	77.9449	-161.511	38.3254	4542.09	215.409	2.4371	162253	86267.9	103501	2246.91	3172.89	-14.0247	943.582	45800.6	641.878	-0.622074	-4.33545	1	1	0	0	0	SLAM+FLT3+,
278	export_A9 ST-HSC SC3_CV2.csv	A9	SC3	CV	ST-HSC	HSC_ST	TT22	22	48	201	101068	79259	3728.48	61.2871	113.753	112.465	3912.69	-3.19066	38.3483	1211.6	247.386	197.225	131407	65204.9	77839.1	1457.25	5082.37	10281.4	84.92	11517.1	126.514	-0.378189	-1.33907	1	1	0	0	0	ST-HSC,
279	export_A9 ST-HSC SC3_VC3.csv.1	A9	SC3	VC	ST-HSC	ckit+SCA1-	TT22	22	48	202	120279	110136	1579.51	43.8841	104.99	4691.03	3922.24	98.1371	61.7689	-42.5313	384.22	11.7831	153415	55589.7	76336.1	3940.84	4457.94	23290.6	-435.86	1759.59	421.079	-5.10301	3.8236	1	3	0	0	0	GMP,GMP,
280	export_A9 ST-HSC SC3_VC3.csv.2	A9	SC3	VC	ST-HSC	ckit+SCA1-	TT22	22	48	202	108019	119286	1547.1	134.801	122.196	4567.37	3919.07	-67.0742	65.5771	-34.94	356.949	62.3495	153415	55589.7	76336.1	3940.84	4457.94	23290.6	-435.86	1759.59	421.079	-5.13629	3.80801	1	3	0	0	0	GMP,GMP,GMP,
281	export_A9 ST-HSC SC3_VC3.csv.3	A9	SC3	VC	ST-HSC	ckit+SCA1-	TT22	22	48	202	112136	105170	1499.14	37.8228	88.8513	4457.59	3610.58	489.589	63.4414	-21.3048	349.574	221.828	153415	55589.7	76336.1	3940.84	4457.94	23290.6	-435.86	1759.59	421.079	-5.01038	3.79039	1	3	0	0	0	GMP,GMP,GMP,
282	export_A9 ST-HSC SC3_Vi3.csv.1	A9	SC3	Vi	ST-HSC	ckit+SCA1-	TT22	22	48	203	134305	109224	1.41384	76.4288	198.69	1084.18	5112.86	197.21	64.1857	40.1599	355.093	28.156	165211	76907.3	40.46	4154.24	4751.36	41992.4	-298.537	1023.44	640.433	-3.21028	3.12546	1	8	0	0	0	GMP,GMP,
283	export_A9 ST-HSC SC3_Vi3.csv.2	A9	SC3	Vi	ST-HSC	ckit+SCA1-	TT22	22	48	203	87820.7	81601.9	2.11291	62.6956	89.7107	1025.63	4777.45	77.8894	62.4588	48.3124	193.31	56.2544	165211	76907.3	40.46	4154.24	4751.36	41992.4	-298.537	1023.44	640.433	-3.41537	3.64032	1	8	0	0	0	GMP,GMP,GMP,
284	export_A9 ST-HSC SC3_Vi3.csv.3	A9	SC3	Vi	ST-HSC	ckit+SCA1-	TT22	22	48	203	124524	85601.2	1.70821	86.2106	76.9648	584.542	5022.84	55.0077	77.4365	2.20765	305.581	76.4126	165211	76907.3	40.46	4154.24	4751.36	41992.4	-298.537	1023.44	640.433	-2.41671	3.84688	1	8	0	0	0	ST-HSC,GMP,GMP,GMP,
285	export_A9 ST-HSC SC3_Vi3.csv.4	A9	SC3	Vi	ST-HSC	HSC_ST	TT22	22	48	203	92352.6	99410.4	0.098225	133.267	138.731	735.947	5333.19	147.169	79.4245	123.521	488.58	78.4309	165211	76907.3	40.46	4154.24	4751.36	41992.4	-298.537	1023.44	640.433	-2.67158	2.26357	2	8	0	0	0	MEP,ST-HSC,GMP,GMP,GMP,
286	export_A9 ST-HSC SC3_Vi3.csv.5	A9	SC3	Vi	ST-HSC	ckit+SCA1-	TT22	22	48	203	138071	89558.4	3.58902	98.6489	87.1807	198.958	5240.81	79.7055	72.1469	31.1468	385.927	123.067	165211	76907.3	40.46	4154.24	4751.36	41992.4	-298.537	1023.44	640.433	-0.175917	3.4305	3	8	0	0	0	GMP,MEP,ST-HSC,GMP,GMP,GMP,
287	export_A9 ST-HSC SC3_Vi3.csv.6	A9	SC3	Vi	ST-HSC	ckit+SCA1-	TT22	22	48	203	133647	87419.5	1.26741	95.254	101.342	336.672	5208.81	78.4712	57.819	51.2429	325.529	137.489	165211	76907.3	40.46	4154.24	4751.36	41992.4	-298.537	1023.44	640.433	-1.28736	2.77188	4	8	0	0	0	GMP,GMP,MEP,ST-HSC,GMP,GMP,GMP,
288	export_A9 ST-HSC SC3_Vi3.csv.7	A9	SC3	Vi	ST-HSC	ckit+SCA1-	TT22	22	48	203	136716	96635.1	1.54526	83.3871	125.584	699.845	5070.25	16.7835	66.4658	66.9769	344.609	142.835	165211	76907.3	40.46	4154.24	4751.36	41992.4	-298.537	1023.44	640.433	-2.84851	2.80207	4	8	0	0	0	GMP,GMP,GMP,MEP,ST-HSC,GMP,GMP,GMP,
289	export_A9 ST-HSC SC3_Vi3.csv.8	A9	SC3	Vi	ST-HSC	ckit+SCA1-	TT22	22	48	203	143211	107618	5.26173	136.772	132.382	1444.36	5095.93	203.295	50.5015	4.93594	376.034	170.709	165211	76907.3	40.46	4154.24	4751.36	41992.4	-298.537	1023.44	640.433	-3.58342	3.39699	4	8	0	0	0	GMP,GMP,GMP,MEP,ST-HSC,GMP,GMP,GMP,
290	export_B10 ST-HSC SC3_CF3.csv.1	B10	SC3	CF	ST-HSC	ckit+SCA1-	TT22	22	48	204	132498	87311.1	1963.44	81.5149	137.732	209.312	62.2813	122.334	61.4283	52.1311	260.339	24.3968	144079	84274.6	71577.3	5789.37	4547.39	-14.2432	441.854	7961.02	287.132	-0.829683	2.51631	1	5	0	0	0	ST-HSC,MEP,
291	export_B10 ST-HSC SC3_CF3.csv.2	B10	SC3	CF	ST-HSC	HSC_ST	TT22	22	48	204	119317	88404	1912.23	62.1319	49.644	72.7788	68.624	153.579	61.2178	237.42	262.513	122.652	144079	84274.6	71577.3	5789.37	4547.39	-14.2432	441.854	7961.02	287.132	0.0133072	0.0107397	2	5	0	0	0	MEP,ST-HSC,MEP,
292	export_B10 ST-HSC SC3_CF3.csv.3	B10	SC3	CF	ST-HSC	ckit+SCA1-	TT22	22	48	204	135606	99201.2	1894.23	95.3154	58.5882	219.251	56.4612	100.333	45.6286	38.9517	260.741	160.355	144079	84274.6	71577.3	5789.37	4547.39	-14.2432	441.854	7961.02	287.132	-0.333412	3.45863	3	5	0	0	0	MEP,MEP,ST-HSC,MEP,
293	export_B10 ST-HSC SC3_CF3.csv.4	B10	SC3	CF	ST-HSC	ckit+SCA1-	TT22	22	48	204	139772	88070.9	1937.85	89.3559	69.6445	69.1848	53.831	165.713	59.8045	69.5773	352.267	188.601	144079	84274.6	71577.3	5789.37	4547.39	-14.2432	441.854	7961.02	287.132	1.0825	2.59749	3	5	0	0	0	GMP,MEP,MEP,ST-HSC,MEP,
294	export_B10 ST-HSC SC3_CF3.csv.5	B10	SC3	CF	ST-HSC	ckit+SCA1-	TT22	22	48	204	120274	80922.9	1912.64	82.9812	144.473	341.692	54.0507	77.6371	50.8739	90.0164	335.522	192.87	144079	84274.6	71577.3	5789.37	4547.39	-14.2432	441.854	7961.02	287.132	-1.27668	2.48569	4	5	0	0	0	GMP,MEP,MEP,ST-HSC,MEP,
295	export_B10 ST-HSC SC3_CV2.csv.1	B10	SC3	CV	ST-HSC	HSC_ST	TT22	22	48	205	111372	84766.3	3078.72	129.041	135.877	98.5965	2829.82	56.9488	49.6542	596.886	322.211	31.9331	134342	112419	64900.2	3004.34	5918.03	9573.58	717.764	975.374	99.8232	-0.0959013	-0.815878	1	2	0	0	0	ST-HSC,ST-HSC,
296	export_B10 ST-HSC SC3_CV2.csv.2	B10	SC3	CV	ST-HSC	HSC_ST	TT22	22	48	205	117311	90926.2	3239.34	213.526	187.776	67.4896	2966.58	137.919	55.2914	565.937	400.682	219.263	134342	112419	64900.2	3004.34	5918.03	9573.58	717.764	975.374	99.8232	0.646405	-1.06237	1	2	0	0	0	ST-HSC,ST-HSC,
297	export_B10 ST-HSC SC3_VC2.csv.1	B10	SC3	VC	ST-HSC	SLAM+Flt3+	TT22	22	48	206	133582	91115.1	2948.61	471.723	635.799	196.102	8284.3	-121.649	33.6637	4407.94	288.739	104.087	157475	61895.5	62501.2	3619.05	1947.32	27616.9	2598.28	49180.1	624.229	-0.904918	-4.63633	1	2	0	0	0	SLAM+FLT3+,SLAM+FLT3+,
298	export_B10 ST-HSC SC3_VC2.csv.2	B10	SC3	VC	ST-HSC	SLAM+Flt3+	TT22	22	48	206	137009	108571	2824.11	372.52	330.815	249.644	8181.74	-106.615	27.3766	4458.11	301.944	218.574	157475	61895.5	62501.2	3619.05	1947.32	27616.9	2598.28	49180.1	624.229	-0.497751	-4.43031	1	2	0	0	0	SLAM+FLT3+,SLAM+FLT3+,
299	export_B10 ST-HSC SC3_Vi2.csv.1	B10	SC3	Vi	ST-HSC	HSC_ST	TT22	22	48	207	115833	69013.1	-0.234627	237.062	128.879	116.047	12851.6	-193.28	-15.2957	9235.61	256.406	15.1173	166266	89946.2	-29.75	1579.91	4218.05	41427.4	2578.31	67461.5	432.74	-0.402045	-4.01793	1	2	0	0	0	ST-HSC,ST-HSC,
300	export_B10 ST-HSC SC3_Vi2.csv.2	B10	SC3	Vi	ST-HSC	ckit-	TT22	22	48	207	104898	64543.7	-0.405841	285.248	157.159	153.155	11410.6	-231.515	1.43481	8903.71	140.29	122.327	166266	89946.2	-29.75	1579.91	4218.05	41427.4	2578.31	67461.5	432.74	-0.360002	-4.2194	1	2	0	0	0	ST-HSC,ST-HSC,
301	export_B11 HSC SC3_CV2.csv.1	B11	SC3	CV	HSC	ckit+SCA1-	TT22	22	48	208	150364	124550	3080.51	1132.35	66.0174	168.137	3072.46	151.539	72.2884	21.5644	165.04	153.108	135991	66455.6	58324.3	4535.64	3419.45	11131.5	16435.2	7736.41	5.04167	5.62994	1.12867	1	3	0	0	0	SLAM+MEP,SLAM+MEP,
302	export_B11 HSC SC3_CV2.csv.2	B11	SC3	CV	HSC	ckit+SCA1-	TT22	22	48	208	156217	125605	3007.13	1359.19	59.1034	161.221	3041.35	126.612	62.9032	33.5558	307.404	167.691	135991	66455.6	58324.3	4535.64	3419.45	11131.5	16435.2	7736.41	5.04167	5.06121	0.306179	1	3	0	0	0	ckit-,SLAM+MEP,SLAM+MEP,
303	export_B11 HSC SC3_CV3.csv	B11	SC3	CV	HSC	ckit-	TT22	22	48	208	113875	50554.8	1533.69	763.037	73.5945	187.04	1432.49	160.527	34.4785	-0.841115	87.3592	163.648	135991	66455.6	58324.3	4535.64	3419.45	11131.5	16435.2	7736.41	5.04167	5.19276	1.94756	2	3	0	0	0	ckit-,SLAM+MEP,SLAM+MEP,
304	export_B11 HSC SC3_VC2.csv.1	B11	SC3	VC	HSC	HSC_ST	TT22	22	48	209	128420	100235	4515.69	279.107	81.2698	191.534	12857.2	-153.536	34.3748	3449.62	355.315	27.9467	200292	98441.6	91444.4	-183.289	8298.72	36688.8	4381.2	5304.66	326.854	0.278682	-4.13225	1	3	0	0	0	ST-HSC,ST-HSC,
305	export_B11 HSC SC3_VC2.csv.2	B11	SC3	VC	HSC	HSC_ST	TT22	22	48	209	125755	93240.4	4328.24	266.105	145.824	106.236	12265.4	79.6375	59.9302	746.681	384.606	92.6118	200292	98441.6	91444.4	-183.289	8298.72	36688.8	4381.2	5304.66	326.854	0.599825	-1.54796	1	3	0	0	0	ST-HSC,ST-HSC,ST-HSC,
306	export_B11 HSC SC3_VC2.csv.3	B11	SC3	VC	HSC	HSC_ST	TT22	22	48	209	110493	78739.2	4052.46	177.975	149.282	107.212	11025.4	72.7822	49.3166	908.944	475.589	137.048	200292	98441.6	91444.4	-183.289	8298.72	36688.8	4381.2	5304.66	326.854	0.32141	-1.40102	1	3	0	0	0	ST-HSC,ST-HSC,ST-HSC,
307	export_B11 HSC SC3_Vi1.csv.1	B11	SC3	Vi	HSC	HSC_SLAM	TT22	22	48	210	140595	100837	-1.24542	3528.07	116.441	267.532	23081.1	-344.986	-62.6171	12561	555.51	6.91669	174205	96619.7	-11.9	137.266	5048.61	44330.5	38590.6	35080.3	-119.599	1.33025	-5.92254	1	2	0	0	0	SLAM-HSC,SLAM-HSC,
308	export_B11 HSC SC3_Vi1.csv.2	B11	SC3	Vi	HSC	HSC_SLAM	TT22	22	48	210	139098	90915.5	8.43	2244.93	135.397	259.213	19554.4	-220.512	-58.5987	13874.5	337.643	49.6937	174205	96619.7	-11.9	137.266	5048.61	44330.5	38590.6	35080.3	-119.599	1.29557	-6.00061	1	2	0	0	0	SLAM-HSC,SLAM-HSC,
309	export_B12 HSC SC3_CF2.csv.1	B12	SC3	CF	HSC	ckit-	TT22	22	48	211	137736	116158	2870.54	3391.94	48.177	138.005	61.8233	130.297	34.3736	159.341	108.838	60.1063	198698	100979	116270	4576.41	4279.47	-50.9619	27815.6	6094.2	5.61896	4.89799	-0.598382	1	2	0	0	0	SLAM-HSC,SLAM-HSC,
310	export_B12 HSC SC3_CF2.csv.2	B12	SC3	CF	HSC	HSC_SLAM	TT22	22	48	211	140503	110418	3125.98	3076.74	98.0759	149.12	58.4878	167.038	5.36326	195.619	231.158	205.691	198698	100979	116270	4576.41	4279.47	-50.9619	27815.6	6094.2	5.61896	3.72405	-1.80888	1	2	0	0	0	SLAM-HSC,SLAM-HSC,
311	export_B12 HSC SC3_CV1.csv	B12	SC3	CV	HSC	HSC_SLAM	TT22	22	48	212	104746	62047.4	5488.44	1562.64	60.3629	282.761	5646.29	-79.0437	15.4791	2195.71	289.059	51.8754	175326	66224.7	49918.1	420.437	3156	9194.88	15273.3	6714.08	132.321	1.43578	-5.29263	1	1	0	0	0	SLAM-HSC,
312	export_B12 HSC SC3_VC0.csv	B12	SC3	VC	HSC	HSC_SLAM	TT22	22	48	213	175163	154176	11310.4	2357.32	140.974	943.22	25841.1	-218.897	55.2282	7638.95	545.813	168.196	162701	80580.9	62766.6	1081.97	4397.41	22331	3471.51	19629.7	39.1297	1.15167	-5.90858	1	1	0	0	0	SLAM-HSC,
313	export_B2 MPP SC2_CV2.csv	B2	SC2	CV	MPP	ckit+SCA1-	TT22	22	48	214	150181	136593	3883.97	135.827	849.947	2484.3	4319.93	-5.23953	70.8635	-20.3986	460.648	38.6703	180591	105557	98354.7	9488.61	6377.03	15666.1	-388.71	724.201	1137.23	-3.78022	2.77548	1	5	0	0	0	GMP,GMP,
314	export_B2 MPP SC2_CV3.csv.1	B2	SC2	CV	MPP	ckit+SCA1-	TT22	22	48	214	128326	69456.9	2181.4	66.2495	189.505	1331.47	2412.63	81.1597	61.3394	-0.840448	281.913	38.2461	180591	105557	98354.7	9488.61	6377.03	15666.1	-388.71	724.201	1137.23	-3.39859	3.46405	1	5	0	0	0	GMP,GMP,GMP,
315	export_B2 MPP SC2_CV3.csv.2	B2	SC2	CV	MPP	ckit+SCA1-	TT22	22	48	214	142100	67938.6	2253.6	105.028	221.677	1130.57	2324.17	164.064	58.1528	-25.8449	340.488	53.1195	180591	105557	98354.7	9488.61	6377.03	15666.1	-388.71	724.201	1137.23	-3.45851	3.52463	1	5	0	0	0	GMP,GMP,GMP,GMP,
316	export_B2 MPP SC2_CV3.csv.3	B2	SC2	CV	MPP	ckit+SCA1-	TT22	22	48	214	156348	130288	2118.28	117.752	146.535	4134.15	2359.11	294.414	74.7124	1.27263	477.893	85.4665	180591	105557	98354.7	9488.61	6377.03	15666.1	-388.71	724.201	1137.23	-4.96358	3.67187	1	5	0	0	0	GMP,GMP,GMP,GMP,GMP,
317	export_B2 MPP SC2_CV3.csv.4	B2	SC2	CV	MPP	ckit+SCA1-	TT22	22	48	214	180881	119487	2324.75	58.8978	101.396	4506.72	2488.87	172.532	81.0515	-37.1276	478.302	171.09	180591	105557	98354.7	9488.61	6377.03	15666.1	-388.71	724.201	1137.23	-5.06138	3.82494	1	5	0	0	0	GMP,GMP,GMP,GMP,GMP,
318	export_B2 MPP SC2_VC2.csv.1	B2	SC2	VC	MPP	ckit+SCA1-	TT22	22	48	215	94498.4	108526	2402.82	8.93836	160.403	3341.93	7016.49	280.54	30.4584	34.0091	310.131	90.8491	151988	78933.9	50920.1	11075.1	3663.27	29940.8	-965.078	1704.64	752.228	-4.7698	3.56906	1	3	0	0	0	GMP,GMP,
319	export_B2 MPP SC2_VC2.csv.2	B2	SC2	VC	MPP	ckit+SCA1-	TT22	22	48	215	113346	75622.9	2393.03	37.1695	138.054	2506.52	7855.46	370.016	33.6978	-5.11215	288.11	181.105	151988	78933.9	50920.1	11075.1	3663.27	29940.8	-965.078	1704.64	752.228	-4.72173	3.7106	1	3	0	0	0	GMP,GMP,GMP,
320	export_B2 MPP SC2_VC2.csv.3	B2	SC2	VC	MPP	ckit+SCA1-	TT22	22	48	215	133601	124572	2800.9	30.8398	144.413	3796.86	8625.14	4.16845	64.4849	37.223	522.917	205.785	151988	78933.9	50920.1	11075.1	3663.27	29940.8	-965.078	1704.64	752.228	-4.74441	3.55007	1	3	0	0	0	GMP,GMP,GMP,
321	export_B3 ST-HSC SC2_CF3.csv.1	B3	SC2	CF	ST-HSC	ckit+SCA1-	TT22	22	48	216	111536	104348	1782.3	61.0368	154.214	3638.13	69.3881	159.981	61.9774	-10.2822	249.698	163.164	149176	89503.5	69217.5	9971.62	4244.27	-7.34462	-3454.86	1228.44	542.324	-4.85208	3.73347	1	2	0	0	0	GMP,GMP,
322	export_B3 ST-HSC SC2_CF3.csv.2	B3	SC2	CF	ST-HSC	ckit+SCA1-	TT22	22	48	216	117545	89031.5	1775.55	30.1695	232.647	4442.87	39.3667	-56.752	50.1638	-28.3254	314.713	165.445	149176	89503.5	69217.5	9971.62	4244.27	-7.34462	-3454.86	1228.44	542.324	-4.92256	3.73242	1	2	0	0	0	GMP,GMP,
323	export_B3 ST-HSC SC2_Vi2.csv.1	B3	SC2	Vi	ST-HSC	ckit+SCA1-	TT22	22	48	217	118255	55775.2	0.91124	68.9626	111.385	619.603	8434.22	74.5636	50.7104	-3.33775	368.725	4.84708	162296	55097	-7.14	9074.58	3765.08	35168.8	1054.81	16522.1	597.155	-2.57122	3.70899	1	3	0	0	0	GMP,GMP,
324	export_B3 ST-HSC SC2_Vi2.csv.2	B3	SC2	Vi	ST-HSC	ckit+SCA1-	TT22	22	48	217	111379	73304.7	1.18549	75.8824	151.066	600.833	8468.94	55.1242	49.8701	7.9573	393.161	61.9223	162296	55097	-7.14	9074.58	3765.08	35168.8	1054.81	16522.1	597.155	-2.74155	3.405	1	3	0	0	0	MEP,GMP,GMP,
325	export_B3 ST-HSC SC2_Vi2.csv.3	B3	SC2	Vi	ST-HSC	ckit+SCA1-	TT22	22	48	217	104344	59197.3	1.2749	79.5227	229.315	163.689	8679.2	42.1811	27.5619	10.5283	349.04	138.557	162296	55097	-7.14	9074.58	3765.08	35168.8	1054.81	16522.1	597.155	-0.280209	3.30688	2	3	0	0	0	MEP,GMP,GMP,
326	export_B4 ST-HSC SC2_CF2.csv.1	B4	SC2	CF	ST-HSC	ckit+SCA1-	TT22	22	48	218	147831	144638	4141.19	104.061	82.155	6078.46	62.0184	-95.7272	29.9043	-44.1492	474.744	20.2611	179647	88215.9	102444	7406.35	8013.85	-6.85273	259.309	6712.82	346.657	-5.29053	3.88748	1	2	0	0	0	GMP,GMP,
327	export_B4 ST-HSC SC2_CF2.csv.2	B4	SC2	CF	ST-HSC	ckit+SCA1-	TT22	22	48	218	132543	94920.2	5145.23	100.129	110.536	6968.36	78.4832	-145.545	27.7779	56.0539	618.178	141.992	179647	88215.9	102444	7406.35	8013.85	-6.85273	259.309	6712.82	346.657	-4.84486	3.52303	1	2	0	0	0	GMP,GMP,
328	export_B4 ST-HSC SC2_VC2.csv.1	B4	SC2	VC	ST-HSC	HSC_ST	TT22	22	48	219	100951	61709.6	2829.7	100.537	134.08	125.794	8278.55	50.3102	73.3779	360.458	374.06	49.8771	166798	81127.1	56314.4	1852.45	5325.05	27132.9	-626.4	29574.4	355.178	-0.352634	-0.309655	1	4	0	0	0	ST-HSC,ST-HSC,
329	export_B4 ST-HSC SC2_VC2.csv.2	B4	SC2	VC	ST-HSC	HSC_ST	TT22	22	48	219	127804	72530.8	2663.64	82.5811	151.797	109.805	7779.52	82.1263	77.6311	206.868	562.567	83.9511	166798	81127.1	56314.4	1852.45	5325.05	27132.9	-626.4	29574.4	355.178	-0.0424301	0.505449	1	4	0	0	0	MPP,ST-HSC,ST-HSC,
330	export_B4 ST-HSC SC2_VC2.csv.3	B4	SC2	VC	ST-HSC	HSC_ST	TT22	22	48	219	125255	79276.7	2827.9	153.583	289.477	191.437	8440.82	-8.25678	58.9737	358.013	511.26	178.204	166798	81127.1	56314.4	1852.45	5325.05	27132.9	-626.4	29574.4	355.178	-1.49833	-0.595838	2	4	0	0	0	ST-HSC,MPP,ST-HSC,ST-HSC,
331	export_B4 ST-HSC SC2_VC2.csv.4	B4	SC2	VC	ST-HSC	HSC_ST	TT22	22	48	219	104710	64553.5	2778.72	51.4197	165.643	137.328	8187.01	82.2946	58.2821	282.086	455.002	201.858	166798	81127.1	56314.4	1852.45	5325.05	27132.9	-626.4	29574.4	355.178	-0.755541	-0.108699	3	4	0	0	0	ST-HSC,MPP,ST-HSC,ST-HSC,
332	export_B4 ST-HSC SC2_Vi2.csv.1	B4	SC2	Vi	ST-HSC	ckit+SCA1-	TT22	22	48	220	106451	45581	0.907032	70.2495	89.651	106.325	8691.11	76.6002	33.7201	1.43227	432.476	111.576	151662	65797.5	-39.27	2022.37	3908.81	35259.3	366.478	796.028	196.497	0.597514	3.38446	1	3	0	0	0	MEP,MEP,
333	export_B4 ST-HSC SC2_Vi2.csv.2	B4	SC2	Vi	ST-HSC	ckit+SCA1-	TT22	22	48	220	97601.1	63937	1.09568	26.6283	89.5308	156.386	8481.48	76.8831	39.7436	8.9678	424.404	132.725	151662	65797.5	-39.27	2022.37	3908.81	35259.3	366.478	796.028	196.497	0.143467	3.34565	1	3	0	0	0	MEP,MEP,MEP,
334	export_B4 ST-HSC SC2_Vi2.csv.3	B4	SC2	Vi	ST-HSC	ckit+SCA1-	TT22	22	48	220	87711.5	55361.9	1.48431	50.6733	102.215	87.9422	8854.34	64.7065	38.1621	4.18457	373.766	193.064	151662	65797.5	-39.27	2022.37	3908.81	35259.3	366.478	796.028	196.497	0.659101	3.15826	1	3	0	0	0	MEP,MEP,MEP,
335	export_B5 HSC SC2_Vi2.csv.1	B5	SC2	Vi	HSC	HSC_SLAM	TT22	22	48	221	117604	83193.2	7.34253	1624.55	69.8789	61.0795	11129.6	92.1346	21.0838	174.932	396.3	50.8935	175351	88788.3	2.38	2451.32	6605.37	47122.8	15665.3	23551.7	71.535	3.72263	-1.32407	1	6	0	0	0	SLAM-HSC,SLAM-HSC,
336	export_B5 HSC SC2_Vi2.csv.2	B5	SC2	Vi	HSC	HSC_SLAM	TT22	22	48	221	133105	96027.5	0.637495	1082.28	125.405	102.113	11367.9	70.518	36.1149	282.243	197.06	66.2938	175351	88788.3	2.38	2451.32	6605.37	47122.8	15665.3	23551.7	71.535	3.38561	-1.33824	1	6	0	0	0	SLAM-HSC,SLAM-HSC,SLAM-HSC,
337	export_B5 HSC SC2_Vi3.csv.1	B5	SC2	Vi	HSC	HSC_SLAM	TT22	22	48	221	83453.1	55526.6	8.663	563.303	91.9314	87.7357	6077.14	90.458	33.2027	127.66	431.674	18.1005	175351	88788.3	2.38	2451.32	6605.37	47122.8	15665.3	23551.7	71.535	2.72682	-0.252123	1	6	0	0	0	SLAM+MEP,SLAM-HSC,SLAM-HSC,SLAM-HSC,
338	export_B5 HSC SC2_Vi3.csv.2	B5	SC2	Vi	HSC	ckit+SCA1-	TT22	22	48	221	71294.6	47344.9	0.602415	876.489	70.2221	77.1248	5551.91	29.7141	23.6673	79.0931	337.762	139.287	175351	88788.3	2.38	2451.32	6605.37	47122.8	15665.3	23551.7	71.535	4.47013	0.277146	2	6	0	0	0	SLAM-HSC,SLAM+MEP,SLAM-HSC,SLAM-HSC,SLAM-HSC,
339	export_B5 HSC SC2_Vi3.csv.3	B5	SC2	Vi	HSC	HSC_SLAM	TT22	22	48	221	84086.1	44731	0.739157	421.105	89.343	77.5159	5334.77	71.7489	13.6645	165.615	372.234	160.48	175351	88788.3	2.38	2451.32	6605.37	47122.8	15665.3	23551.7	71.535	2.37989	-0.332703	3	6	0	0	0	SLAM-HSC,SLAM-HSC,SLAM+MEP,SLAM-HSC,SLAM-HSC,SLAM-HSC,
340	export_B5 HSC SC2_Vi3.csv.4	B5	SC2	Vi	HSC	HSC_SLAM	TT22	22	48	221	101061	74150.4	0.973936	891.419	64.7056	56.4067	6307.37	101.336	13.6254	120.75	255.15	186.953	175351	88788.3	2.38	2451.32	6605.37	47122.8	15665.3	23551.7	71.535	3.6178	-0.26825	3	6	0	0	0	SLAM-HSC,SLAM-HSC,SLAM+MEP,SLAM-HSC,SLAM-HSC,SLAM-HSC,
341	export_B6 HSC SC2_CV3.csv.1	B6	SC2	CV	HSC	ckit+SCA1-	TT22	22	48	222	74041.6	55155.3	1764.58	283.894	80.7419	118.244	2040.27	42.7904	45.5808	18.2781	157.37	48.1023	170408	123645	68727.3	3443.71	11718.6	16880.5	6487.68	2116.96	160.724	3.81769	3.10297	1	2	0	0	0	MEP,SLAM+MEP,
342	export_B6 HSC SC2_CV3.csv.2	B6	SC2	CV	HSC	ckit+SCA1-	TT22	22	48	222	87522.9	54118	1734.73	185.822	111.081	97.8085	2182.84	40.4877	40.8156	27.7831	210.797	63.5185	170408	123645	68727.3	3443.71	11718.6	16880.5	6487.68	2116.96	160.724	2.9046	3.19632	2	2	0	0	0	MEP,SLAM+MEP,
343	export_B6 HSC SC2_VC2.csv	B6	SC2	VC	HSC	ckit+SCA1-	TT22	22	48	223	145139	133339	4687.52	283.147	104.608	128.911	13100.1	86.2304	70.4625	9.208	230.75	137.158	199222	97201.6	88588.4	2783.21	11820.1	40530.3	7588.69	1531.54	140.914	3.63006	2.69246	1	1	0	0	0	SLAM+MEP,
344	export_B6 HSC SC2_Vi0.csv	B6	SC2	Vi	HSC	HSC_SLAM	TT22	22	48	224	130074	85818.8	23.8964	815.538	213.244	335.205	36171.5	-191.954	91.8625	6699.03	732.588	196.24	137522	73182.6	97.58	453.588	2446.01	36453.1	9818.76	34073.3	-13.1693	0.9341	-5.76035	1	1	0	0	0	SLAM-HSC,
345	export_B7 MPP SC3_CF2.csv.1	B7	SC3	CF	MPP	MPP	TT22	22	48	225	130918	104463	3413.71	78.5566	413.485	788.369	109.439	-31.4213	50.8223	4142.79	431.231	45.6286	163552	75645.9	71269.1	3633.38	2043.52	-8.37578	315.309	57627.3	1458.47	-1.31564	-2.98199	1	2	0	0	0	MPP,MPP,
346	export_B7 MPP SC3_CF2.csv.2	B7	SC3	CF	MPP	MPP	TT22	22	48	225	120628	99030	3466.4	-186.114	638.32	386.965	111.824	-0.930846	41.2579	4818.73	386.101	79.8924	163552	75645.9	71269.1	3633.38	2043.52	-8.37578	315.309	57627.3	1458.47	-1.52216	-2.65932	1	2	0	0	0	MPP,MPP,
347	export_B7 MPP SC3_VC4.csv.1	B7	SC3	VC	MPP	ckit+SCA1-	TT22	22	48	226	123280	115240	706.606	201.319	123.002	14746.5	2058.44	-516.9	40.1078	4.81673	191.341	47.6993	157932	70242.1	71755.8	4113.73	5773.94	26900.6	-723.14	3050.99	18432.1	-6.3685	3.97188	1	9	0	0	0	GMP,GMP,
348	export_B7 MPP SC3_VC4.csv.2	B7	SC3	VC	MPP	ckit+SCA1-	TT22	22	48	226	134733	127056	699.242	20.3857	91.731	8254.82	2156.99	-336.725	65.2887	27.1962	250.466	49.3362	157932	70242.1	71755.8	4113.73	5773.94	26900.6	-723.14	3050.99	18432.1	-6.07714	3.90001	1	9	0	0	0	GMP,GMP,GMP,
349	export_B7 MPP SC3_VC4.csv.3	B7	SC3	VC	MPP	ckit+SCA1-	TT22	22	48	226	129969	76552	656.685	65.8736	100.552	12174.7	2061.77	468.151	9.73166	-3.17139	193.651	60.0705	157932	70242.1	71755.8	4113.73	5773.94	26900.6	-723.14	3050.99	18432.1	-6.18051	3.96073	1	9	0	0	0	GMP,GMP,GMP,GMP,
350	export_B7 MPP SC3_VC4.csv.4	B7	SC3	VC	MPP	ckit+SCA1-	TT22	22	48	226	129939	112228	655.708	78.4903	122.631	6689.57	2033.25	-99.6708	51.4191	5.48011	226.882	90.0762	157932	70242.1	71755.8	4113.73	5773.94	26900.6	-723.14	3050.99	18432.1	-5.76907	3.97422	1	9	0	0	0	GMP,GMP,GMP,GMP,GMP,
351	export_B7 MPP SC3_VC4.csv.5	B7	SC3	VC	MPP	ckit+SCA1-	TT22	22	48	226	155934	95954.7	679.874	-15.3105	117.061	15099	2141.23	-168.05	27.6617	-26.7974	186.974	113.556	157932	70242.1	71755.8	4113.73	5773.94	26900.6	-723.14	3050.99	18432.1	-6.21392	3.87216	1	9	0	0	0	MyP,GMP,GMP,GMP,GMP,GMP,
352	export_B7 MPP SC3_VC4.csv.6	B7	SC3	VC	MPP	ckit-	TT22	22	48	226	126174	84944.4	698.2	108.842	134.4	12049.3	2189.54	73.4602	15.2394	-37.6399	148.859	114.913	157932	70242.1	71755.8	4113.73	5773.94	26900.6	-723.14	3050.99	18432.1	-6.35207	4.06919	2	9	0	0	0	MyP,MyP,GMP,GMP,GMP,GMP,GMP,
353	export_B7 MPP SC3_VC4.csv.7	B7	SC3	VC	MPP	ckit-	TT22	22	48	226	157324	129193	679.958	-5.81704	90.4787	12636.3	2092.11	-62.728	38.2473	-14.8903	144.009	120.63	157932	70242.1	71755.8	4113.73	5773.94	26900.6	-723.14	3050.99	18432.1	-6.18736	3.89834	2	9	0	0	0	GMP,MyP,MyP,GMP,GMP,GMP,GMP,GMP,
354	export_B7 MPP SC3_VC4.csv.8	B7	SC3	VC	MPP	ckit+SCA1-	TT22	22	48	226	147531	123328	696.096	96.2544	76.0122	13077.5	2196.76	5.37512	31.9031	5.58937	176.954	179.026	157932	70242.1	71755.8	4113.73	5773.94	26900.6	-723.14	3050.99	18432.1	-6.29523	3.9643	3	9	0	0	0	GMP,GMP,MyP,MyP,GMP,GMP,GMP,GMP,GMP,
355	export_B7 MPP SC3_VC4.csv.9	B7	SC3	VC	MPP	ckit+SCA1-	TT22	22	48	226	150065	115997	709.036	99.3447	104.244	8244.1	2094.33	77.1987	55.7433	-25.2734	325.586	193.884	157932	70242.1	71755.8	4113.73	5773.94	26900.6	-723.14	3050.99	18432.1	-5.54815	3.91162	3	9	0	0	0	GMP,GMP,MyP,MyP,GMP,GMP,GMP,GMP,GMP,
356	export_B7 MPP SC3_Vi3.csv.1	B7	SC3	Vi	MPP	HSC_ST	TT22	22	48	227	108098	85711.8	1.39012	194.164	203.066	352.532	5864.18	58.2596	36.3691	1356.22	216.35	29.9458	166144	85132.6	-21.42	6880.4	2941.57	43070.9	319.789	26383.9	1627.93	-1.3533	-3.34874	1	3	0	0	0	ST-HSC,ST-HSC,
357	export_B7 MPP SC3_Vi3.csv.2	B7	SC3	Vi	MPP	HSC_ST	TT22	22	48	227	77861	89276.9	1.441	267.232	158.194	116.005	4993.61	93.1891	40.3199	1217.78	181.034	49.6156	166144	85132.6	-21.42	6880.4	2941.57	43070.9	319.789	26383.9	1627.93	0.61697	-2.98886	1	3	0	0	0	MPP,ST-HSC,ST-HSC,
358	export_B7 MPP SC3_Vi3.csv.3	B7	SC3	Vi	MPP	HSC_ST	TT22	22	48	227	97126.8	86879.4	0.898761	269.776	282.465	319.58	6051.34	33.626	61.1353	1775.39	336.905	136.009	166144	85132.6	-21.42	6880.4	2941.57	43070.9	319.789	26383.9	1627.93	-1.36885	-3.82449	2	3	0	0	0	MPP,ST-HSC,ST-HSC,
359	export_B8 MPP SC3_CF3.csv.1	B8	SC3	CF	MPP	HSC_ST	TT22	22	48	228	92762.8	83770.6	1770.76	258.148	272.529	4408.05	61.2825	310.129	9.71369	393.674	221.373	33.3596	155168	73306.4	86186.9	7070.77	3295.51	-13.4211	-76.9536	11510	1504.25	-5.33018	2.77146	1	3	0	0	0	MPP,MPP,
360	export_B8 MPP SC3_CF3.csv.2	B8	SC3	CF	MPP	HSC_ST	TT22	22	48	228	106126	71913.1	1969.38	277.412	283.782	3634.24	55.9954	121.715	57.1605	484.898	252.28	84.7072	155168	73306.4	86186.9	7070.77	3295.51	-13.4211	-76.9536	11510	1504.25	-5.37196	2.76698	1	3	0	0	0	MPP,MPP,MPP,
361	export_B8 MPP SC3_CF3.csv.3	B8	SC3	CF	MPP	MPP	TT22	22	48	228	88488.2	74252.9	1919.1	116.077	345.288	5190.83	71.0921	-48.3809	36.0488	468.718	197.707	140.377	155168	73306.4	86186.9	7070.77	3295.51	-13.4211	-76.9536	11510	1504.25	-5.40754	2.83277	1	3	0	0	0	MPP,MPP,MPP,
362	export_B8 MPP SC3_Vi2.csv	B8	SC3	Vi	MPP	HSC_ST	TT22	22	48	229	151495	121623	4.5985	255.585	224.917	938.657	7859.14	117.001	85.9096	600.805	281.149	14.1762	154757	66640	10.71	5417.18	3056.62	35693.7	-128.305	9734.35	778.443	-1.28171	-1.55222	1	1	0	0	0	ST-HSC,
363	export_B9 ST-HSC SC3_CF3.csv	B9	SC3	CF	ST-HSC	ckit+SCA1-	TT22	22	48	230	144855	107139	1845.86	236.92	120.503	3363.88	50.3383	25.3123	39.2194	87.8188	344.797	127.957	139505	75879.2	52604	5239.81	6592.06	-18.2949	-159.037	2975.24	462.334	-4.41946	3.29552	1	1	0	0	0	GMP,
364	export_B9 ST-HSC SC3_CV3.csv.1	B9	SC3	CV	ST-HSC	HSC_ST	TT22	22	48	231	125990	92731.6	2285.89	96.3255	140.228	2135.54	2645.87	109.651	56.1171	143.636	362.107	107.198	141343	71283.4	85275.4	4286.9	4241.01	13080.6	-509.023	582.794	214.989	-4.32507	3.14037	1	3	0	0	0	GMP,ST-HSC,
365	export_B9 ST-HSC SC3_CV3.csv.2	B9	SC3	CV	ST-HSC	ckit+SCA1-	TT22	22	48	231	115927	93407.9	2133.87	154.606	102.221	607.764	2530.36	116.575	75.4596	84.9939	247.395	108.181	141343	71283.4	85275.4	4286.9	4241.01	13080.6	-509.023	582.794	214.989	-2.75044	2.68337	2	3	0	0	0	GMP,GMP,ST-HSC,
366	export_B9 ST-HSC SC3_CV3.csv.3	B9	SC3	CV	ST-HSC	ckit+SCA1-	TT22	22	48	231	95755.5	87308.7	2086.02	251.493	137.404	1588.44	2399.3	262.926	54.6061	80.4098	253.282	116.728	141343	71283.4	85275.4	4286.9	4241.01	13080.6	-509.023	582.794	214.989	-4.10908	3.3297	2	3	0	0	0	GMP,GMP,ST-HSC,
367	export_B9 ST-HSC SC3_VC3.csv.1	B9	SC3	VC	ST-HSC	ckit+SCA1-	TT22	22	48	232	135106	94575.1	1646.35	299.307	125.777	302.97	4573.12	164.015	84.7453	91.2271	520.443	34.1465	156751	75355.6	67208.8	7048.74	6157.87	34790.2	2605.37	22850.4	140.617	2.95946	1.45586	1	5	0	0	0	GMP,GMP,
368	export_B9 ST-HSC SC3_VC3.csv.2	B9	SC3	VC	ST-HSC	ckit+SCA1-	TT22	22	48	232	145886	139855	1764.67	79.6251	117.296	722.543	4647.46	253.431	85.7428	-12.2551	534.569	141.987	156751	75355.6	67208.8	7048.74	6157.87	34790.2	2605.37	22850.4	140.617	-2.69583	3.45923	1	5	0	0	0	GMP,GMP,GMP,
369	export_B9 ST-HSC SC3_VC3.csv.3	B9	SC3	VC	ST-HSC	ckit+SCA1-	TT22	22	48	232	158042	104031	1758.83	127.445	141.344	801	4810.19	154.115	83.4536	42.1357	495.168	166.282	156751	75355.6	67208.8	7048.74	6157.87	34790.2	2605.37	22850.4	140.617	-3.0125	2.89155	1	5	0	0	0	SLAM+MEP,GMP,GMP,GMP,
370	export_B9 ST-HSC SC3_VC3.csv.4	B9	SC3	VC	ST-HSC	ckit+SCA1-	TT22	22	48	232	172870	118927	1699.89	520.835	108.399	256.99	4646.03	137.543	87.6972	89.1536	594.432	202.148	156751	75355.6	67208.8	7048.74	6157.87	34790.2	2605.37	22850.4	140.617	3.50887	1.06388	2	5	0	0	0	MEP,SLAM+MEP,GMP,GMP,GMP,
371	export_B9 ST-HSC SC3_VC4.csv	B9	SC3	VC	ST-HSC	ckit+SCA1-	TT22	22	48	232	108016	62980	926.098	152.624	66.7281	171.225	2624.39	195.547	43.7008	-0.869721	201.692	170.576	156751	75355.6	67208.8	7048.74	6157.87	34790.2	2605.37	22850.4	140.617	3.50398	3.30046	3	5	0	0	0	MEP,SLAM+MEP,GMP,GMP,GMP,
372	export_B9 ST-HSC SC3_Vi2.csv.1	B9	SC3	Vi	ST-HSC	SLAM+Flt3+	TT22	22	48	233	130869	70335.1	4.59717	1106.7	343.196	143.906	9324.86	-74.8282	24.6411	2558.26	192.407	66.417	152073	72662.6	-5.95	680.728	4285.08	34459.5	662.744	12804	263.321	0.0490613	-4.9156	1	4	0	0	0	ST-HSC,SLAM+FLT3+,
373	export_B9 ST-HSC SC3_Vi2.csv.2	B9	SC3	Vi	ST-HSC	ckit-	TT22	22	48	233	126302	79836	1.36371	273.694	189.311	150.904	9063.89	-4.97321	37.3026	2102.26	131.017	79.5412	152073	72662.6	-5.95	680.728	4285.08	34459.5	662.744	12804	263.321	0.362276	-3.98045	2	4	0	0	0	SLAM-HSC,ST-HSC,SLAM+FLT3+,
374	export_B9 ST-HSC SC3_Vi2.csv.3	B9	SC3	Vi	ST-HSC	ckit-	TT22	22	48	233	120630	66925.9	0.955732	523.061	96.2925	194.215	9916.55	21.2468	32.0394	1804.63	121.058	102.368	152073	72662.6	-5.95	680.728	4285.08	34459.5	662.744	12804	263.321	0.794968	-4.05761	3	4	0	0	0	SLAM+FLT3+,SLAM-HSC,ST-HSC,SLAM+FLT3+,
375	export_B9 ST-HSC SC3_Vi2.csv.4	B9	SC3	Vi	ST-HSC	SLAM+Flt3+	TT22	22	48	233	135824	76648.6	1.02157	863.142	357.588	183.105	9878.71	-31.6676	34.7921	2285.23	155.699	194.345	152073	72662.6	-5.95	680.728	4285.08	34459.5	662.744	12804	263.321	0.0738535	-4.83479	4	4	0	0	0	SLAM+FLT3+,SLAM-HSC,ST-HSC,SLAM+FLT3+,
376	export_C1 MPP SC2_CV1.csv.1	C1	SC2	CV	MPP	MPP	TT22	22	48	234	121335	69292.7	7559.94	137.138	1488.26	280.389	7020.8	25.4973	71.6822	234.217	555.338	5.7152	148750	71147.7	78697.1	7823.66	4138.37	10898.1	180.487	38482.1	1371.72	-3.36306	-0.886059	1	2	0	0	0	MPP,MPP,
377	export_C1 MPP SC2_CV1.csv.2	C1	SC2	CV	MPP	MPP	TT22	22	48	234	126662	89488.1	7569.61	100.328	837.066	169.424	7303.99	87.7381	51.2667	202.71	446.373	45.392	148750	71147.7	78697.1	7823.66	4138.37	10898.1	180.487	38482.1	1371.72	-2.78491	-0.74447	1	2	0	0	0	MPP,MPP,
378	export_C1 MPP SC2_VC1.csv.1	C1	SC2	VC	MPP	MPP	TT22	22	48	235	118847	87791.7	5470.67	81.0608	813.57	594.483	20140.4	100.088	67.2906	144.817	744.654	119.641	145893	73162.4	41603.6	6245.69	3015.36	34479.8	1043.77	12455.6	1243.77	-3.72929	0.0217563	1	2	0	0	0	GMP,MPP,
379	export_C1 MPP SC2_VC1.csv.2	C1	SC2	VC	MPP	ckit+SCA1-	TT22	22	48	235	112825	67708.3	4862.81	81.6772	794.43	638.564	17590.2	187.31	31.8168	40.6295	494.898	156.902	145893	73162.4	41603.6	6245.69	3015.36	34479.8	1043.77	12455.6	1243.77	-3.33956	0.838106	2	2	0	0	0	GMP,MPP,
380	export_C10 ST-HSC SC3_CF2.csv.1	C10	SC3	CF	ST-HSC	HSC_SLAM	TT22	22	48	236	147243	102023	3931.91	544.369	217.345	87.7316	66.3334	-2.19077	26.0252	2117.92	362.78	54.0829	139731	63042.6	67434.9	1206.75	3670.94	-11.825	1382.04	18351.7	479.556	0.563027	-3.92453	1	3	0	0	0	SLAM-HSC,SLAM-HSC,
381	export_C10 ST-HSC SC3_CF2.csv.2	C10	SC3	CF	ST-HSC	HSC_SLAM	TT22	22	48	236	152958	103942	3977.71	592.612	177.903	140.003	75.2004	17.2975	50.3323	2311.39	305.992	77.7636	139731	63042.6	67434.9	1206.75	3670.94	-11.825	1382.04	18351.7	479.556	0.509848	-4.28438	1	3	0	0	0	MPP,SLAM-HSC,SLAM-HSC,
382	export_C10 ST-HSC SC3_CF2.csv.3	C10	SC3	CF	ST-HSC	HSC_ST	TT22	22	48	236	143134	88257.5	3804.95	93.066	257.021	240.243	62.579	45.5545	51.5876	2170.52	282.422	163.192	139731	63042.6	67434.9	1206.75	3670.94	-11.825	1382.04	18351.7	479.556	-1.16337	-2.69573	2	3	0	0	0	MPP,SLAM-HSC,SLAM-HSC,
383	export_C10 ST-HSC SC3_CV2.csv.1	C10	SC3	CV	ST-HSC	ckit+SCA1-	TT22	22	48	237	141559	107936	3848.52	158.453	89.4822	127.155	3996.92	121.149	66.6913	83.5921	416.076	28.2698	135526	72729.2	69961.3	845.888	4640.11	10531.1	399.062	2060.71	302.653	1.13834	2.72236	1	4	0	0	0	ST-HSC,MEP,
384	export_C10 ST-HSC SC3_CV2.csv.2	C10	SC3	CV	ST-HSC	HSC_ST	TT22	22	48	237	155658	106032	3699.66	131.678	190.763	100.653	3891.31	201.999	65.3273	178.638	441.207	69.5103	135526	72729.2	69961.3	845.888	4640.11	10531.1	399.062	2060.71	302.653	0.400851	0.767388	2	4	0	0	0	ST-HSC,ST-HSC,MEP,
385	export_C10 ST-HSC SC3_CV2.csv.3	C10	SC3	CV	ST-HSC	HSC_ST	TT22	22	48	237	153727	117542	4265.39	98.9472	115.819	120.036	4525.02	118.525	104.768	521.124	408.452	72.1358	135526	72729.2	69961.3	845.888	4640.11	10531.1	399.062	2060.71	302.653	-0.236029	-0.509442	2	4	0	0	0	ST-HSC,ST-HSC,ST-HSC,MEP,
386	export_C10 ST-HSC SC3_CV2.csv.4	C10	SC3	CV	ST-HSC	HSC_ST	TT22	22	48	237	148106	108173	4021.67	27.5054	135.694	67.318	4504.37	137.318	74.505	153.07	317.913	184.289	135526	72729.2	69961.3	845.888	4640.11	10531.1	399.062	2060.71	302.653	0.338571	1.23876	2	4	0	0	0	ST-HSC,ST-HSC,ST-HSC,MEP,
387	export_C10 ST-HSC SC3_VC2.csv.1	C10	SC3	VC	ST-HSC	HSC_ST	TT22	22	48	238	120867	83189.5	3916.46	83.257	86.9182	182.672	10741.5	-177.217	32.6394	4480.71	188.867	42.4868	165251	82991.8	67819.3	867.27	5115.12	31094.4	-165.857	30818.9	360.19	-0.708874	-3.29685	1	4	0	0	0	ST-HSC,ST-HSC,
388	export_C10 ST-HSC SC3_VC2.csv.2	C10	SC3	VC	ST-HSC	HSC_ST	TT22	22	48	238	126580	67803.2	3801.45	52.8058	209.074	121.45	10668.1	55.4896	25.6728	3456.44	196.282	92.3009	165251	82991.8	67819.3	867.27	5115.12	31094.4	-165.857	30818.9	360.19	-0.874826	-3.064	1	4	0	0	0	ST-HSC,ST-HSC,ST-HSC,
389	export_C10 ST-HSC SC3_VC2.csv.3	C10	SC3	VC	ST-HSC	HSC_ST	TT22	22	48	238	115186	75298	4281.2	280.481	160.992	124.477	12215.4	59.3434	41.1202	3473.47	236.22	128.412	165251	82991.8	67819.3	867.27	5115.12	31094.4	-165.857	30818.9	360.19	0.174008	-4.01458	1	4	0	0	0	ST-HSC,ST-HSC,ST-HSC,ST-HSC,
390	export_C10 ST-HSC SC3_VC2.csv.4	C10	SC3	VC	ST-HSC	HSC_ST	TT22	22	48	238	100113	68874.8	3891.15	103.51	131.215	151.612	10523.8	-86.2229	45.5356	4400.99	325.8	207.339	165251	82991.8	67819.3	867.27	5115.12	31094.4	-165.857	30818.9	360.19	-0.744259	-3.24179	1	4	0	0	0	ST-HSC,ST-HSC,ST-HSC,ST-HSC,
391	export_C11 HSC SC3_CF3.csv.1	C11	SC3	CF	HSC	HSC_ST	TT22	22	48	239	117867	73226.5	1999.74	293.612	80.6392	108.733	55.1128	42.2442	38.5314	343.958	455.132	45.5715	161223	78336.5	75333	3167.87	4983.34	-20.2688	7038.94	18924	293.225	0.782539	-0.719303	1	4	0	0	0	SLAM-HSC,ST-HSC,
392	export_C11 HSC SC3_CF3.csv.2	C11	SC3	CF	HSC	HSC_SLAM	TT22	22	48	239	95885.1	78215.2	2006.77	850.857	83.4545	43.6309	57.0398	30.1169	28.4515	783.704	380.114	199.474	161223	78336.5	75333	3167.87	4983.34	-20.2688	7038.94	18924	293.225	1.61918	-3.18897	2	4	0	0	0	ST-HSC,SLAM-HSC,ST-HSC,
393	export_C11 HSC SC3_CF3.csv.3	C11	SC3	CF	HSC	HSC_ST	TT22	22	48	239	101653	76391.2	2421.39	291.714	109.075	59.1785	41.9371	-4.47689	37.4025	756.262	472.767	217.878	161223	78336.5	75333	3167.87	4983.34	-20.2688	7038.94	18924	293.225	0.670099	-1.36605	3	4	0	0	0	SLAM-HSC,ST-HSC,SLAM-HSC,ST-HSC,
394	export_C11 HSC SC3_CF3.csv.4	C11	SC3	CF	HSC	HSC_SLAM	TT22	22	48	239	142257	95613.7	2130.06	1947.67	67.737	76.6497	43.1759	88.025	35.6823	643.156	328.239	219.086	161223	78336.5	75333	3167.87	4983.34	-20.2688	7038.94	18924	293.225	3.05356	-2.74446	4	4	0	0	0	SLAM-HSC,ST-HSC,SLAM-HSC,ST-HSC,
395	export_C11 HSC SC3_VC3.csv.1	C11	SC3	VC	HSC	HSC_SLAM	TT22	22	48	240	119259	52532.7	1686.41	1266.55	72.7803	58.8156	5567.26	83.1838	17.815	261.03	312.013	46.0134	154132	71271.5	54972.1	1690.71	6600.37	28102.9	6000.59	3723.98	51.4496	3.43665	-1.4595	1	8	0	0	0	SLAM-HSC,SLAM-HSC,
396	export_C11 HSC SC3_VC3.csv.2	C11	SC3	VC	HSC	HSC_SLAM	TT22	22	48	240	97226.6	70974.6	1424.6	1409.57	52.9974	150.682	4733.69	21.8808	34.3646	195.789	373.403	95.875	154132	71271.5	54972.1	1690.71	6600.37	28102.9	6000.59	3723.98	51.4496	3.72003	-1.2062	1	8	0	0	0	SLAM-HSC,SLAM-HSC,SLAM-HSC,
397	export_C11 HSC SC3_VC3.csv.3	C11	SC3	VC	HSC	HSC_SLAM	TT22	22	48	240	120093	69956	1585.39	599.182	87.0275	62.4497	4813.48	146.429	41.3945	558.092	401.479	117.434	154132	71271.5	54972.1	1690.71	6600.37	28102.9	6000.59	3723.98	51.4496	1.61873	-2.90234	1	8	0	0	0	SLAM-HSC,SLAM-HSC,SLAM-HSC,SLAM-HSC,
398	export_C11 HSC SC3_VC3.csv.4	C11	SC3	VC	HSC	HSC_SLAM	TT22	22	48	240	131435	60144.5	1465.97	1140.62	30.9175	157.821	4791.58	49.9026	32.9213	197.099	312.796	124.753	154132	71271.5	54972.1	1690.71	6600.37	28102.9	6000.59	3723.98	51.4496	3.69298	-1.20077	1	8	0	0	0	SLAM-HSC,SLAM-HSC,SLAM-HSC,SLAM-HSC,SLAM-HSC,
399	export_C11 HSC SC3_VC3.csv.5	C11	SC3	VC	HSC	HSC_SLAM	TT22	22	48	240	117117	70194.3	1430.75	1395.74	61.7824	121.798	4676.26	31.4208	37.0187	705.195	185.134	132.877	154132	71271.5	54972.1	1690.71	6600.37	28102.9	6000.59	3723.98	51.4496	2.77046	-2.76991	1	8	0	0	0	SLAM-HSC,SLAM-HSC,SLAM-HSC,SLAM-HSC,SLAM-HSC,SLAM-HSC,
400	export_C11 HSC SC3_VC3.csv.6	C11	SC3	VC	HSC	HSC_SLAM	TT22	22	48	240	107869	63313	1411.4	996.133	55.3027	129.817	4657.95	23.2159	26.1041	336.372	291.915	133.986	154132	71271.5	54972.1	1690.71	6600.37	28102.9	6000.59	3723.98	51.4496	3.31232	-1.45296	1	8	0	0	0	SLAM-HSC,SLAM-HSC,SLAM-HSC,SLAM-HSC,SLAM-HSC,SLAM-HSC,SLAM-HSC,
401	export_C11 HSC SC3_VC3.csv.7	C11	SC3	VC	HSC	HSC_SLAM	TT22	22	48	240	101919	92196.9	1437.85	1451.5	33.6927	53.2218	4715.17	63.9962	28.4651	559.692	222.164	186.098	154132	71271.5	54972.1	1690.71	6600.37	28102.9	6000.59	3723.98	51.4496	3.04025	-2.36981	1	8	0	0	0	SLAM-HSC,SLAM-HSC,SLAM-HSC,SLAM-HSC,SLAM-HSC,SLAM-HSC,SLAM-HSC,SLAM-HSC,
402	export_C11 HSC SC3_VC3.csv.8	C11	SC3	VC	HSC	HSC_SLAM	TT22	22	48	240	128221	67505.9	1427	713.181	67.1381	85.8889	4503.26	53.5893	38.4828	406.251	359.677	200.188	154132	71271.5	54972.1	1690.71	6600.37	28102.9	6000.59	3723.98	51.4496	3.03167	-1.4268	1	8	0	0	0	SLAM-HSC,SLAM-HSC,SLAM-HSC,SLAM-HSC,SLAM-HSC,SLAM-HSC,SLAM-HSC,SLAM-HSC,
403	export_C12 HSC SC3_CV2.csv.1	C12	SC3	CV	HSC	HSC_SLAM	TT22	22	48	241	118071	100295	3976.14	774.737	157.946	136.863	5513.38	8.93183	43.2864	1533.09	321.535	74.1462	158934	86613	65093	1150.48	3456.15	14544.8	6224.14	54321.9	257.891	1.1709	-3.67201	1	3	0	0	0	SLAM-HSC,SLAM-HSC,
404	export_C12 HSC SC3_CV2.csv.2	C12	SC3	CV	HSC	HSC_SLAM	TT22	22	48	241	116094	81927.6	3496.69	392.207	113.364	158.627	4605.75	-2.58247	38.4509	1199.43	326.854	99.646	158934	86613	65093	1150.48	3456.15	14544.8	6224.14	54321.9	257.891	1.05334	-3.34175	1	3	0	0	0	SLAM-HSC,SLAM-HSC,SLAM-HSC,
405	export_C12 HSC SC3_CV2.csv.3	C12	SC3	CV	HSC	HSC_SLAM	TT22	22	48	241	111801	101259	3931.38	514.121	153.902	152.283	4922.22	-65.7663	58.3585	1790.25	498.206	123.002	158934	86613	65093	1150.48	3456.15	14544.8	6224.14	54321.9	257.891	0.943787	-3.60392	1	3	0	0	0	SLAM-HSC,SLAM-HSC,SLAM-HSC,
406	export_C12 HSC SC3_VC1.csv	C12	SC3	VC	HSC	HSC_SLAM	TT22	22	48	242	165738	130382	4706.58	1011.27	166.885	274.13	16060.7	-48.9851	64.3338	3569.81	329.762	32.9614	148199	65119.2	44542.9	65.5735	3472.9	24752.1	3432.79	39331.2	-18.3929	0.750956	-5.41284	1	3	0	0	0	SLAM-HSC,SLAM-HSC,
407	export_C12 HSC SC3_VC2.csv.1	C12	SC3	VC	HSC	HSC_SLAM	TT22	22	48	242	108920	61219.4	2413.45	1398.83	98.8244	176.436	7947.08	191.174	2.16601	3293.52	324.728	99.9016	148199	65119.2	44542.9	65.5735	3472.9	24752.1	3432.79	39331.2	-18.3929	1.32968	-5.34936	1	3	0	0	0	SLAM-HSC,SLAM-HSC,SLAM-HSC,
408	export_C12 HSC SC3_VC2.csv.2	C12	SC3	VC	HSC	HSC_SLAM	TT22	22	48	242	114606	77000.8	2511.76	1700.09	140.747	178.359	8256.18	-38.2784	2.56582	3869.34	267.948	138.52	148199	65119.2	44542.9	65.5735	3472.9	24752.1	3432.79	39331.2	-18.3929	1.19514	-5.56309	1	3	0	0	0	SLAM-HSC,SLAM-HSC,SLAM-HSC,
409	export_C12 HSC SC3_Vi3.csv.1	C12	SC3	Vi	HSC	ckit+SCA1-	TT22	22	48	243	145910	102733	3.38998	1027.7	45.0343	160.086	5923.57	157.868	52.2334	-2.69211	451.934	1.18183	185255	111723	-16.66	5332.07	7662.75	47960	8245.19	5888.05	98.3665	4.75474	0.735657	1	14	0	0	0	SLAM+MEP,SLAM+MEP,
410	export_C12 HSC SC3_Vi3.csv.2	C12	SC3	Vi	HSC	ckit+SCA1-	TT22	22	48	243	149541	105182	2.88792	1639.02	66.9621	136.073	5697.4	137.582	64.385	2.71459	365.854	117.945	185255	111723	-16.66	5332.07	7662.75	47960	8245.19	5888.05	98.3665	5.1003	0.401336	1	14	0	0	0	SLAM+MEP,SLAM+MEP,SLAM+MEP,
411	export_C12 HSC SC3_Vi4.csv.1	C12	SC3	Vi	HSC	ckit+SCA1-	TT22	22	48	243	126719	69892.2	0.151183	254.377	65.7532	69.0778	3150.14	163.748	37.4788	-31.3047	223.335	7.98949	185255	111723	-16.66	5332.07	7662.75	47960	8245.19	5888.05	98.3665	3.95637	2.85826	1	14	0	0	0	ckit-,SLAM+MEP,SLAM+MEP,SLAM+MEP,
412	export_C12 HSC SC3_Vi4.csv.2	C12	SC3	Vi	HSC	ckit-	TT22	22	48	243	141817	131580	1.32713	578.986	125.278	83.1068	3060.22	116.202	44.7481	-15.5898	109.919	21.9951	185255	111723	-16.66	5332.07	7662.75	47960	8245.19	5888.05	98.3665	5.00301	2.25308	2	14	0	0	0	SLAM+MEP,ckit-,SLAM+MEP,SLAM+MEP,SLAM+MEP,
413	export_C12 HSC SC3_Vi4.csv.3	C12	SC3	Vi	HSC	ckit+SCA1-	TT22	22	48	243	81426.6	61634.7	3.20049	255.23	81.2241	69.1095	2690.85	130.389	44.2925	-0.407381	214.472	22.3028	185255	111723	-16.66	5332.07	7662.75	47960	8245.19	5888.05	98.3665	3.87991	2.9084	3	14	0	0	0	SLAM+MEP,SLAM+MEP,ckit-,SLAM+MEP,SLAM+MEP,SLAM+MEP,
414	export_C12 HSC SC3_Vi4.csv.4	C12	SC3	Vi	HSC	ckit+SCA1-	TT22	22	48	243	118722	68733.9	1.62833	268.612	73.2433	114.367	2798.8	130.469	54.5251	5.539	400.156	38.7116	185255	111723	-16.66	5332.07	7662.75	47960	8245.19	5888.05	98.3665	2.58159	2.59658	3	14	0	0	0	SLAM+MEP,SLAM+MEP,SLAM+MEP,ckit-,SLAM+MEP,SLAM+MEP,SLAM+MEP,
415	export_C12 HSC SC3_Vi4.csv.5	C12	SC3	Vi	HSC	ckit+SCA1-	TT22	22	48	243	126027	69944.8	1.64207	352.265	60.4854	60.0718	2930.71	75.364	47.2026	-18.0086	189.545	45.7494	185255	111723	-16.66	5332.07	7662.75	47960	8245.19	5888.05	98.3665	4.08361	2.75925	3	14	0	0	0	ckit-,SLAM+MEP,SLAM+MEP,SLAM+MEP,ckit-,SLAM+MEP,SLAM+MEP,SLAM+MEP,
416	export_C12 HSC SC3_Vi4.csv.6	C12	SC3	Vi	HSC	ckit-	TT22	22	48	243	116344	62236.3	1.35235	244.726	83.2636	53.6404	2861.87	82.1428	48.1566	-5.36455	115.531	78.2293	185255	111723	-16.66	5332.07	7662.75	47960	8245.19	5888.05	98.3665	4.05154	3.47785	4	14	0	0	0	SLAM+MEP,ckit-,SLAM+MEP,SLAM+MEP,SLAM+MEP,ckit-,SLAM+MEP,SLAM+MEP,SLAM+MEP,
417	export_C12 HSC SC3_Vi4.csv.7	C12	SC3	Vi	HSC	ckit+SCA1-	TT22	22	48	243	120511	83491.5	1.62646	251.357	71.1316	62.6764	2833.36	115.868	38.4931	-6.5434	553.482	129.322	185255	111723	-16.66	5332.07	7662.75	47960	8245.19	5888.05	98.3665	2.13623	3.00041	5	14	0	0	0	SLAM+MEP,SLAM+MEP,ckit-,SLAM+MEP,SLAM+MEP,SLAM+MEP,ckit-,SLAM+MEP,SLAM+MEP,SLAM+MEP,
418	export_C12 HSC SC3_Vi4.csv.8	C12	SC3	Vi	HSC	ckit+SCA1-	TT22	22	48	243	112400	52759.8	2.6927	284.856	128.528	66.927	2865.36	90.6772	32.7198	5.32052	266.917	133.703	185255	111723	-16.66	5332.07	7662.75	47960	8245.19	5888.05	98.3665	3.38933	2.77109	5	14	0	0	0	ckit-,SLAM+MEP,SLAM+MEP,ckit-,SLAM+MEP,SLAM+MEP,SLAM+MEP,ckit-,SLAM+MEP,SLAM+MEP,SLAM+MEP,
419	export_C12 HSC SC3_Vi4.csv.9	C12	SC3	Vi	HSC	ckit-	TT22	22	48	243	132633	90311.7	1.44435	153.34	84.5887	98.2109	2805.2	179.807	42.0123	-4.14236	127.484	147.103	185255	111723	-16.66	5332.07	7662.75	47960	8245.19	5888.05	98.3665	3.77541	3.56584	6	14	0	0	0	SLAM+MEP,ckit-,SLAM+MEP,SLAM+MEP,ckit-,SLAM+MEP,SLAM+MEP,SLAM+MEP,ckit-,SLAM+MEP,SLAM+MEP,SLAM+MEP,
420	export_C12 HSC SC3_Vi4.csv.10	C12	SC3	Vi	HSC	ckit+SCA1-	TT22	22	48	243	139262	100380	1.46451	206.434	105.767	110.368	3205.61	167.313	50.6512	-4.84313	164.495	171.319	185255	111723	-16.66	5332.07	7662.75	47960	8245.19	5888.05	98.3665	3.7496	3.43826	7	14	0	0	0	SLAM+MEP,SLAM+MEP,ckit-,SLAM+MEP,SLAM+MEP,ckit-,SLAM+MEP,SLAM+MEP,SLAM+MEP,ckit-,SLAM+MEP,SLAM+MEP,SLAM+MEP,
421	export_C12 HSC SC3_Vi4.csv.11	C12	SC3	Vi	HSC	ckit+SCA1-	TT22	22	48	243	143872	96088.4	1.63314	574.093	71.8345	86.9799	3050.84	129.781	55.665	-17.0486	170.342	174.869	185255	111723	-16.66	5332.07	7662.75	47960	8245.19	5888.05	98.3665	4.89895	2.28519	7	14	0	0	0	SLAM+MEP,SLAM+MEP,SLAM+MEP,ckit-,SLAM+MEP,SLAM+MEP,ckit-,SLAM+MEP,SLAM+MEP,SLAM+MEP,ckit-,SLAM+MEP,SLAM+MEP,SLAM+MEP,
422	export_C12 HSC SC3_Vi4.csv.12	C12	SC3	Vi	HSC	ckit+SCA1-	TT22	22	48	243	110896	74109.5	1.66504	321.107	106.339	84.3728	2946.32	109.727	41.198	-12.0816	193.022	211.376	185255	111723	-16.66	5332.07	7662.75	47960	8245.19	5888.05	98.3665	4.01532	2.81785	7	14	0	0	0	SLAM+MEP,SLAM+MEP,SLAM+MEP,ckit-,SLAM+MEP,SLAM+MEP,ckit-,SLAM+MEP,SLAM+MEP,SLAM+MEP,ckit-,SLAM+MEP,SLAM+MEP,SLAM+MEP,
423	export_C2 MPP SC2_CV1.csv	C2	SC2	CV	MPP	ckit+SCA1-	TT22	22	48	244	86754.8	53009.6	8751.04	45.3293	1687.71	191.231	9483.65	29.9446	43.6515	78.2747	269.838	115.127	183315	101718	101182	6701.81	4613.7	14878.2	-1569.69	29646	4471.41	-3.13701	-0.314543	1	1	0	0	0	MEP,
424	export_C2 MPP SC2_VC2.csv	C2	SC2	VC	MPP	HSC_ST	TT22	22	48	245	145820	95920.1	3582.24	99.9659	63.628	158.592	10903.8	85.5931	81.3602	199.804	327.9	173.291	198507	114257	81247.3	2911.2	7836.79	37988.4	251.617	20330.9	677.206	0.279224	0.726348	1	6	0	0	0	MEP,ST-HSC,
425	export_C2 MPP SC2_VC3.csv.1	C2	SC2	VC	MPP	ckit+SCA1-	TT22	22	48	245	109605	58479.4	1870.61	92.7161	130.767	97.4055	5739.33	23.4412	41.5214	81.1063	326.679	27.2962	198507	114257	81247.3	2911.2	7836.79	37988.4	251.617	20330.9	677.206	0.676202	1.80373	2	6	0	0	0	ST-HSC,MEP,ST-HSC,
426	export_C2 MPP SC2_VC3.csv.2	C2	SC2	VC	MPP	HSC_ST	TT22	22	48	245	127084	80206.9	2111.05	93.6948	99.2841	53.3278	6154.22	158.396	59.4744	112.598	630.908	77.559	198507	114257	81247.3	2911.2	7836.79	37988.4	251.617	20330.9	677.206	0.78448	1.7544	3	6	0	0	0	MEP,ST-HSC,MEP,ST-HSC,
427	export_C2 MPP SC2_VC3.csv.3	C2	SC2	VC	MPP	ckit+SCA1-	TT22	22	48	245	92352	64683.9	2028.88	49.2162	124.407	59.3946	5658.08	169.273	48.5553	70.9186	527.665	93.006	198507	114257	81247.3	2911.2	7836.79	37988.4	251.617	20330.9	677.206	0.533914	2.7479	4	6	0	0	0	ST-HSC,MEP,ST-HSC,MEP,ST-HSC,
428	export_C2 MPP SC2_VC3.csv.4	C2	SC2	VC	MPP	HSC_ST	TT22	22	48	245	136750	103047	2073.54	118.854	131.1	64.3331	6558.43	79.1939	55.4439	125.031	350.309	142.66	198507	114257	81247.3	2911.2	7836.79	37988.4	251.617	20330.9	677.206	0.619947	1.5371	5	6	0	0	0	MEP,ST-HSC,MEP,ST-HSC,MEP,ST-HSC,
429	export_C2 MPP SC2_VC3.csv.5	C2	SC2	VC	MPP	ckit+SCA1-	TT22	22	48	245	94304	61073.9	1779.45	116.687	167.333	60.6868	5740.01	76.8513	41.7706	54.788	233.499	147.574	198507	114257	81247.3	2911.2	7836.79	37988.4	251.617	20330.9	677.206	0.789619	1.96234	6	6	0	0	0	MEP,ST-HSC,MEP,ST-HSC,MEP,ST-HSC,
430	export_C3 ST-HSC SC2_CF2.csv	C3	SC2	CF	ST-HSC	ckit+SCA1-	TT22	22	48	246	104461	76468.6	4526.63	277.85	85.4413	90.4581	38.7229	191.036	51.4357	5.45309	239.307	153.135	134912	64976.4	67618.2	4491.51	4919.08	4.54181	1995.38	1746.53	322.376	3.81044	2.83452	1	1	0	0	0	SLAM+MEP,
431	export_C3 ST-HSC SC2_VC2.csv.1	C3	SC2	VC	ST-HSC	ckit+SCA1-	TT22	22	48	247	85210.6	49547.7	3331.83	83.0135	139.555	264.973	10737.8	93.5943	35.4692	72.7418	644.466	43.1355	145985	80188.2	44049	947.026	5974.07	34019.3	413.347	11624.4	86.9906	-1.17256	3.16814	1	4	0	0	0	ST-HSC,MEP,
432	export_C3 ST-HSC SC2_VC2.csv.2	C3	SC2	VC	ST-HSC	HSC_ST	TT22	22	48	247	160141	82309.1	3443.74	27.8143	124.331	159.544	10854.2	18.2173	68.5551	110.22	412.482	49.733	145985	80188.2	44049	947.026	5974.07	34019.3	413.347	11624.4	86.9906	0.357176	1.68392	2	4	0	0	0	MEP,ST-HSC,MEP,
433	export_C3 ST-HSC SC2_VC2.csv.3	C3	SC2	VC	ST-HSC	ckit+SCA1-	TT22	22	48	247	81984	74216.7	3167.5	60.1925	117.711	144.294	10008.5	115.344	30.1246	39.0807	557.423	107.922	145985	80188.2	44049	947.026	5974.07	34019.3	413.347	11624.4	86.9906	0.0865136	3.18396	3	4	0	0	0	ST-HSC,MEP,ST-HSC,MEP,
434	export_C3 ST-HSC SC2_VC2.csv.4	C3	SC2	VC	ST-HSC	HSC_ST	TT22	22	48	247	108347	84565.4	3233.09	64.9703	88.1564	110.411	10214.9	135.359	62.4264	104.57	301.085	154.935	145985	80188.2	44049	947.026	5974.07	34019.3	413.347	11624.4	86.9906	0.615084	1.75927	4	4	0	0	0	ST-HSC,MEP,ST-HSC,MEP,
435	export_C3 ST-HSC SC2_Vi1.csv.1	C3	SC2	Vi	ST-HSC	ckit+SCA1-	TT22	22	48	248	120514	83971.6	1.24218	326.953	96.0165	259.702	23304.6	80.0873	22.1394	40.2878	250.618	60.6288	119563	102463	34.51	7449.77	4848.22	54491.5	2358.39	2407.67	8.22163	3.33363	1.7742	1	2	0	0	0	GMP,SLAM+MEP,
436	export_C3 ST-HSC SC2_Vi1.csv.2	C3	SC2	Vi	ST-HSC	ckit+SCA1-	TT22	22	48	248	106907	70544.9	0.987886	605.646	93.4013	440.184	24702.2	31.5428	32.7936	-11.3036	217.007	157.669	119563	102463	34.51	7449.77	4848.22	54491.5	2358.39	2407.67	8.22163	4.48823	1.78897	2	2	0	0	0	GMP,SLAM+MEP,
437	export_C4 ST-HSC SC2_CV2.csv.1	C4	SC2	CV	ST-HSC	HSC_ST	TT22	22	48	249	114573	62961.7	4769.82	-84.3719	118.162	115.493	4495.29	2.68655	57.995	702.886	291.889	70.1518	146461	68513.1	76781.2	250.219	5978.43	9759.94	786.906	7807.94	77.5273	-0.604842	-0.511508	1	3	0	0	0	ST-HSC,ST-HSC,
438	export_C4 ST-HSC SC2_CV2.csv.2	C4	SC2	CV	ST-HSC	HSC_ST	TT22	22	48	249	108131	72983.4	4803.92	127.647	79.9205	110.379	4421.7	60.2309	34.5036	430.799	235.792	148.636	146461	68513.1	76781.2	250.219	5978.43	9759.94	786.906	7807.94	77.5273	-0.0200194	-0.53399	1	3	0	0	0	ST-HSC,ST-HSC,ST-HSC,
439	export_C4 ST-HSC SC2_CV2.csv.3	C4	SC2	CV	ST-HSC	HSC_ST	TT22	22	48	249	108761	59969.3	4324.82	81.6098	63.7737	72.404	3822.12	61.2457	55.2356	472.885	222.108	158.963	146461	68513.1	76781.2	250.219	5978.43	9759.94	786.906	7807.94	77.5273	-0.0493833	-0.390684	1	3	0	0	0	ST-HSC,ST-HSC,ST-HSC,
440	export_C4 ST-HSC SC2_VC1.csv	C4	SC2	VC	ST-HSC	HSC_ST	TT22	22	48	250	145949	113387	4207.99	27.6673	210.61	183.163	13686.4	101.772	79.4673	210.377	766.424	172.796	147686	157587	30146.3	2867.36	2704.69	24809.9	-330.33	8039.11	501.625	-1.57817	0.100497	1	3	0	0	0	MEP,ST-HSC,
441	export_C4 ST-HSC SC2_VC2.csv.1	C4	SC2	VC	ST-HSC	ckit+SCA1-	TT22	22	48	250	82891.4	60950.3	2061.18	60.2985	228.482	65.518	6759.75	76.1841	49.1965	78.3683	405.405	7.03838	147686	157587	30146.3	2867.36	2704.69	24809.9	-330.33	8039.11	501.625	0.155617	1.94576	2	3	0	0	0	MEP,MEP,ST-HSC,
442	export_C4 ST-HSC SC2_VC2.csv.2	C4	SC2	VC	ST-HSC	ckit+SCA1-	TT22	22	48	250	75547.4	60781.8	2202.6	51.0365	198.597	121.927	7501.38	18.7386	56.037	95.8196	475.664	96.1209	147686	157587	30146.3	2867.36	2704.69	24809.9	-330.33	8039.11	501.625	0.246207	1.92744	2	3	0	0	0	MEP,MEP,ST-HSC,
443	export_C4 ST-HSC SC2_Vi2.csv	C4	SC2	Vi	ST-HSC	MPP	TT22	22	48	251	119306	85056.4	2.24092	-26.6843	431.95	143.073	11825.6	33.5366	37.99	843.503	469.621	189.097	166430	81335.3	-13.09	5785.06	4401.15	46805.6	1331.69	18315.9	373.955	-2.05805	-2.15877	1	1	0	0	0	MPP,
444	export_C5 HSC SC2_CV2.csv.1	C5	SC2	CV	HSC	HSC_ST	TT22	22	48	252	79095.7	62713.7	3352.55	-51.6206	98.4855	179.311	4026.29	-98.9713	25.257	2888.21	581.169	157.178	174549	74577.3	61937.1	664.132	4734.12	12972	5701.83	30474.5	-22.3689	-1.04479	-2.85029	1	4	0	0	0	ST-HSC,ST-HSC,
445	export_C5 HSC SC2_CV2.csv.2	C5	SC2	CV	HSC	HSC_ST	TT22	22	48	252	101736	60791.3	3729.54	10.7591	81.1184	95.3953	4448.08	-21.7821	-2.11413	3606.92	350.495	157.716	174549	74577.3	61937.1	664.132	4734.12	12972	5701.83	30474.5	-22.3689	-0.865065	-2.99363	1	4	0	0	0	ST-HSC,ST-HSC,ST-HSC,
446	export_C5 HSC SC2_CV2.csv.3	C5	SC2	CV	HSC	HSC_ST	TT22	22	48	252	93454.9	55480.3	3360.88	44.1218	65.966	105.794	4194.56	-83.3948	6.03385	3254.23	245.084	207.893	174549	74577.3	61937.1	664.132	4734.12	12972	5701.83	30474.5	-22.3689	-0.801647	-3.0668	1	4	0	0	0	MyP,ST-HSC,ST-HSC,ST-HSC,
447	export_C5 HSC SC2_CV5.csv	C5	SC2	CV	HSC	ckit-	TT22	22	48	252	75081	73537.3	443.345	185936	32332.4	4783.41	291.415	70903.7	-6233.42	46820.7	-493.638	94.7149	174549	74577.3	61937.1	664.132	4734.12	12972	5701.83	30474.5	-22.3689	-1.38995	-5.2723	2	4	0	0	0	MyP,ST-HSC,ST-HSC,ST-HSC,
448	export_C5 HSC SC2_VC2.csv	C5	SC2	VC	HSC	ckit+SCA1-	TT22	22	48	253	156799	90367	2783.95	255.816	78.3967	83.24	8136.87	170	74.391	15.0877	441.614	2.86754	160388	69640	61113.6	105.434	9937	27754.1	5798.05	1145.01	18.9571	2.48768	2.67173	1	6	0	0	0	MEP,SLAM+MEP,
449	export_C5 HSC SC2_VC3.csv.1	C5	SC2	VC	HSC	ckit+SCA1-	TT22	22	48	253	129350	90465.1	1412.44	135.69	72.8269	93.6561	4538.7	86.2005	35.4119	60.692	453.495	13.1342	160388	69640	61113.6	105.434	9937	27754.1	5798.05	1145.01	18.9571	1.15867	2.79594	2	6	0	0	0	ckit-,MEP,SLAM+MEP,
450	export_C5 HSC SC2_VC3.csv.2	C5	SC2	VC	HSC	ckit-	TT22	22	48	253	102296	66131.2	1414.83	259.764	80.8202	47.3228	4641.74	108.499	43.6406	20.9713	77.4055	27.6968	160388	69640	61113.6	105.434	9937	27754.1	5798.05	1145.01	18.9571	4.1462	3.48617	3	6	0	0	0	MEP,ckit-,MEP,SLAM+MEP,
451	export_C5 HSC SC2_VC3.csv.3	C5	SC2	VC	HSC	ckit+SCA1-	TT22	22	48	253	122163	67406.8	1451.76	91.4546	53.2047	124.988	4504.03	37.0847	42.7942	89.0686	535.901	83.642	160388	69640	61113.6	105.434	9937	27754.1	5798.05	1145.01	18.9571	0.963904	2.70584	4	6	0	0	0	SLAM+MEP,MEP,ckit-,MEP,SLAM+MEP,
452	export_C5 HSC SC2_VC3.csv.4	C5	SC2	VC	HSC	ckit+SCA1-	TT22	22	48	253	114287	73724	1422.16	370.091	69.196	79.7901	4626.22	79.5426	26.8463	16.4097	478.461	124.158	160388	69640	61113.6	105.434	9937	27754.1	5798.05	1145.01	18.9571	2.65502	2.46118	5	6	0	0	0	ckit-,SLAM+MEP,MEP,ckit-,MEP,SLAM+MEP,
453	export_C5 HSC SC2_VC3.csv.5	C5	SC2	VC	HSC	ckit-	TT22	22	48	253	154638	48945.3	1463.19	243.759	87.2716	71.7295	4560.87	100.12	29.7644	32.3687	82.7135	140.242	160388	69640	61113.6	105.434	9937	27754.1	5798.05	1145.01	18.9571	4.09565	3.45058	6	6	0	0	0	ckit-,SLAM+MEP,MEP,ckit-,MEP,SLAM+MEP,
454	export_C6 HSC SC2_Vi2.csv.1	C6	SC2	Vi	HSC	HSC_ST	TT22	22	48	254	105167	64284.3	1.32579	290.655	77.247	105.219	10323.5	62.6221	39.5707	229.786	361.697	8.05828	160330	70182.6	101.15	1759.25	4270.19	45664	6042.71	14174.6	251.74	1.37874	-0.123369	1	3	0	0	0	SLAM-HSC,ST-HSC,
455	export_C6 HSC SC2_Vi2.csv.2	C6	SC2	Vi	HSC	HSC_SLAM	TT22	22	48	254	83440.1	64209.6	7.2034	335.511	93.2272	48.3938	11429.3	51.3365	30.5096	574.879	481.402	41.171	160330	70182.6	101.15	1759.25	4270.19	45664	6042.71	14174.6	251.74	0.767802	-1.25506	2	3	0	0	0	ST-HSC,SLAM-HSC,ST-HSC,
456	export_C6 HSC SC2_Vi2.csv.3	C6	SC2	Vi	HSC	HSC_ST	TT22	22	48	254	116418	66794.7	0.979769	291.011	76.6594	95.7787	10509.5	68.8815	34.0471	620.993	399.723	116.414	160330	70182.6	101.15	1759.25	4270.19	45664	6042.71	14174.6	251.74	0.59622	-1.45366	3	3	0	0	0	ST-HSC,SLAM-HSC,ST-HSC,
457	export_C7 MPP SC3_VC1.csv.1	C7	SC3	VC	MPP	SLAM+Flt3+	TT22	22	48	255	131442	101454	5122.19	470.81	628.026	203.424	14948.1	-137.973	63.2686	4887.32	189.839	50.1306	157393	73001.7	54253.3	2984.98	2343.72	22673.7	-83.9661	30417.8	2444.57	-0.990374	-4.58406	1	2	0	0	0	SLAM+FLT3+,SLAM+FLT3+,
458	export_C7 MPP SC3_VC1.csv.2	C7	SC3	VC	MPP	SLAM+Flt3+	TT22	22	48	255	134452	97507.4	5622.69	661.492	842.458	300.987	16669.4	-122.993	55.6984	5502	273.159	117.168	157393	73001.7	54253.3	2984.98	2343.72	22673.7	-83.9661	30417.8	2444.57	-1.03224	-4.6337	1	2	0	0	0	SLAM+FLT3+,SLAM+FLT3+,
459	export_C7 MPP SC3_Vi0.csv	C7	SC3	Vi	MPP	HSC_SLAM	TT22	22	48	256	85431.1	77986.7	-49.0531	12085.9	-507.876	208626	30906.1	99921.3	-5859.65	92145.3	11825.8	35.2947	145477	65382.2	11.9	2954.78	2465.48	32624.7	1837.23	48222.9	1093.93	-5.28625	-5.7664	1	1	0	0	0	SLAM-HSC,
460	export_C8 MPP SC3_VC5.csv	C8	SC3	VC	MPP	ckit+SCA1-	TT22	22	48	257	110088	116717	526.951	89.3761	175.501	10488.3	1433.96	232.142	11.7969	-27.8209	176.128	102.039	141688	100266	69816.1	8157.01	6706.42	32425.4	-459.125	728.669	786.773	-6.13605	3.97942	1	1	0	0	0	GMP,
461	export_C8 MPP SC3_Vi2.csv.1	C8	SC3	Vi	MPP	SLAM+Flt3+	TT22	22	48	258	76729.6	67416.8	7.54181	360.53	381.853	238.996	8643.02	26.91	35.0865	1049.56	201.8	197.767	177495	164390	-16.66	1864.41	4648.34	46066.2	1336.75	5921.36	1139.99	-1.60379	-3.58444	1	2	0	0	0	MPP,SLAM+FLT3+,
462	export_C8 MPP SC3_Vi2.csv.2	C8	SC3	Vi	MPP	MPP	TT22	22	48	258	126032	79141.2	0.109824	279.917	562.25	436.367	10069.8	-24.7908	35.5371	1180.5	217.731	213.013	177495	164390	-16.66	1864.41	4648.34	46066.2	1336.75	5921.36	1139.99	-1.88374	-3.8762	2	2	0	0	0	MPP,SLAM+FLT3+,
463	export_C9 ST-HSC SC3_CF2.csv.1	C9	SC3	CF	ST-HSC	HSC_SLAM	TT22	22	48	259	132759	109861	4081.55	734.518	146.125	334.831	71.0522	-79.6682	31.6728	3939.89	230.03	15.9769	146648	70019.6	91060	3116.92	4745.22	-17.7103	689.717	26091.3	46.115	0.426803	-4.96605	1	2	0	0	0	SLAM-HSC,SLAM-HSC,
464	export_C9 ST-HSC SC3_CF2.csv.2	C9	SC3	CF	ST-HSC	HSC_SLAM	TT22	22	48	259	137974	91682.1	3985.2	330.114	204.8	213.446	74.057	-125.52	33.7814	4698.7	268.78	158.903	146648	70019.6	91060	3116.92	4745.22	-17.7103	689.717	26091.3	46.115	-0.31513	-4.3915	1	2	0	0	0	SLAM-HSC,SLAM-HSC,
465	export_C9 ST-HSC SC3_VC3.csv	C9	SC3	VC	ST-HSC	ckit-	TT22	22	48	260	70633.4	74396.9	1125.08	62.1371	137.748	990.253	2958.14	-70.2623	45.0755	186.413	124.705	21.9664	195150	115557	89929.5	8119.69	10801.4	41341.6	-667.413	4874.16	365.727	-3.89884	3.00324	1	1	0	0	0	ST-HSC,
466	export_C9 ST-HSC SC3_Vi2.csv.1	C9	SC3	Vi	ST-HSC	ckit+SCA1-	TT22	22	48	261	104222	69918	1.36781	98.8305	104.343	97.5691	8845.81	74.9433	52.9855	85.0939	235.453	153.816	149154	62934.3	7.14	438.809	4132.59	32453.6	-301.27	917.979	227.549	0.88523	1.91731	1	2	0	0	0	MEP,MEP,
467	export_C9 ST-HSC SC3_Vi2.csv.2	C9	SC3	Vi	ST-HSC	ckit+SCA1-	TT22	22	48	261	97551.7	69631	0.968873	93.4002	141.522	105.407	7842.82	49.2419	34.1093	88.2608	234.656	183.961	149154	62934.3	7.14	438.809	4132.59	32453.6	-301.27	917.979	227.549	0.743181	1.81184	1	2	0	0	0	MEP,MEP,
468	export_D1 MPP SC2_CF1.csv	D1	SC2	CF	MPP	ckit+SCA1-	TT22	22	48	262	83359.5	56247	9405.09	163.199	489.254	377.849	243.003	135.549	84.3072	95.4948	402.008	148.328	162374	109519	97031.4	6217.71	5969.31	-19.4555	676.477	1010.17	2313.42	-2.61355	0.600518	1	1	0	0	0	GMP,
469	export_D1 MPP SC2_VC1.csv	D1	SC2	VC	MPP	MPP	TT22	22	48	263	91806.8	57622.7	5772.73	79.6405	673.966	238.611	18010.2	102.385	82.9161	231.847	566.612	154.969	199642	124631	88096.9	4702.84	8069.16	40837.6	-515.725	3764.16	8834.62	-2.84997	-0.699874	1	2	0	0	0	MEP,MPP,
470	export_D1 MPP SC2_VC2.csv	D1	SC2	VC	MPP	ckit+SCA1-	TT22	22	48	263	91818.3	53374.6	3527.43	19.1989	159.401	278.366	10802.6	23.2386	45.8436	73.6301	493.204	105.11	199642	124631	88096.9	4702.84	8069.16	40837.6	-515.725	3764.16	8834.62	-1.46211	2.95672	2	2	0	0	0	MEP,MPP,
471	export_D10 ST-HSC SC3_CV2.csv.1	D10	SC3	CV	ST-HSC	SLAM+Flt3+	TT22	22	48	264	134693	100826	3707.56	655.736	435.384	67.5112	3760.69	-15.0861	53.0913	4357.41	239.563	20.6685	154404	87413.8	81403.1	3262.26	4339.94	10563.6	1299.17	39946.4	143.631	-0.32632	-4.79898	1	3	0	0	0	MPP,SLAM+FLT3+,
472	export_D10 ST-HSC SC3_CV2.csv.2	D10	SC3	CV	ST-HSC	MPP	TT22	22	48	264	128097	80986.7	4004.86	-4.34233	308.104	428.157	4430.88	-69.2313	30.6082	5707.74	406.403	211.851	154404	87413.8	81403.1	3262.26	4339.94	10563.6	1299.17	39946.4	143.631	-1.06829	-3.00341	2	3	0	0	0	SLAM+FLT3+,MPP,SLAM+FLT3+,
473	export_D10 ST-HSC SC3_CV2.csv.3	D10	SC3	CV	ST-HSC	SLAM+Flt3+	TT22	22	48	264	133878	89258.7	3686.72	792.395	482.981	175.082	3977.33	-5.6605	50.9607	3264.12	312.864	212.55	154404	87413.8	81403.1	3262.26	4339.94	10563.6	1299.17	39946.4	143.631	-0.182431	-4.8768	3	3	0	0	0	SLAM+FLT3+,MPP,SLAM+FLT3+,
474	export_D10 ST-HSC SC3_Vi2.csv.1	D10	SC3	Vi	ST-HSC	HSC_SLAM	TT22	22	48	265	152710	109318	8.90608	314.673	188.74	89.1503	10430.2	-24.6316	32.9062	2408.09	303.478	56.884	151848	72070	-21.42	373.922	4860.23	39150.1	1253.11	6825.85	-76.3262	0.364886	-3.88312	1	3	0	0	0	ST-HSC,SLAM-HSC,
475	export_D10 ST-HSC SC3_Vi2.csv.2	D10	SC3	Vi	ST-HSC	HSC_ST	TT22	22	48	265	122613	73516.1	7.37337	47.6377	116.254	172.688	10134.4	-31.2804	46.1849	1737.95	371.209	96.5697	151848	72070	-21.42	373.922	4860.23	39150.1	1253.11	6825.85	-76.3262	-0.829306	-2.37763	2	3	0	0	0	ST-HSC,ST-HSC,SLAM-HSC,
476	export_D10 ST-HSC SC3_Vi2.csv.3	D10	SC3	Vi	ST-HSC	HSC_ST	TT22	22	48	265	128270	86966.9	1.21089	234.985	139.22	81.6525	9534.72	71.4701	26.1055	1991.13	404.286	201.031	151848	72070	-21.42	373.922	4860.23	39150.1	1253.11	6825.85	-76.3262	0.453756	-3.62857	2	3	0	0	0	ST-HSC,ST-HSC,SLAM-HSC,
477	export_D11 HSC SC3_VC3.csv.1	D11	SC3	VC	HSC	ckit+SCA1-	TT22	22	48	266	90977.9	77697.4	885.782	89.0817	57.3105	116.394	4275.2	104.619	53.66	25.311	289.918	27.1717	206785	207910	92104.8	2921.75	14761.2	53402.5	4134.06	1171.65	69.595	0.900164	3.26863	1	7	0	0	0	MEP,MEP,
478	export_D11 HSC SC3_VC3.csv.2	D11	SC3	VC	HSC	ckit+SCA1-	TT22	22	48	266	111274	77750.6	967.761	114.333	91.3547	79.431	4416.91	113.216	46.2076	-15.8532	618.188	39.0891	206785	207910	92104.8	2921.75	14761.2	53402.5	4134.06	1171.65	69.595	1.13073	3.36494	1	7	0	0	0	MEP,MEP,MEP,
479	export_D11 HSC SC3_VC3.csv.3	D11	SC3	VC	HSC	ckit+SCA1-	TT22	22	48	266	144401	81954.6	976.253	35.8389	89.8523	47.7502	4568.4	145.817	33.1105	47.0277	412.965	49.9038	206785	207910	92104.8	2921.75	14761.2	53402.5	4134.06	1171.65	69.595	0.567505	2.81786	1	7	0	0	0	MEP,MEP,MEP,MEP,
480	export_D11 HSC SC3_VC3.csv.4	D11	SC3	VC	HSC	ckit+SCA1-	TT22	22	48	266	143112	85973.9	966.85	49.0402	84.7032	15.0974	4653.74	139.535	48.7769	67.6332	453.281	52.6914	206785	207910	92104.8	2921.75	14761.2	53402.5	4134.06	1171.65	69.595	0.596781	2.65486	1	7	0	0	0	MEP,MEP,MEP,MEP,MEP,
481	export_D11 HSC SC3_VC3.csv.5	D11	SC3	VC	HSC	ckit+SCA1-	TT22	22	48	266	119824	76060.8	895.884	153.226	96.2473	128.259	4472.6	83.5725	38.3154	43.2368	323.234	107.495	206785	207910	92104.8	2921.75	14761.2	53402.5	4134.06	1171.65	69.595	1.25697	3.10069	1	7	0	0	0	MEP,MEP,MEP,MEP,MEP,MEP,
482	export_D11 HSC SC3_VC3.csv.6	D11	SC3	VC	HSC	ckit+SCA1-	TT22	22	48	266	118736	71338.7	950.977	32.8917	83.3502	84.331	4447.6	142.654	33.179	32.2014	479.15	126.818	206785	207910	92104.8	2921.75	14761.2	53402.5	4134.06	1171.65	69.595	0.522942	2.93729	1	7	0	0	0	MEP,MEP,MEP,MEP,MEP,MEP,MEP,
483	export_D11 HSC SC3_VC3.csv.7	D11	SC3	VC	HSC	ckit+SCA1-	TT22	22	48	266	130484	139815	988.789	52.2111	122.625	87.011	5267.33	114.019	49.2183	34.5034	312.727	180.205	206785	207910	92104.8	2921.75	14761.2	53402.5	4134.06	1171.65	69.595	0.601986	3.01502	1	7	0	0	0	MEP,MEP,MEP,MEP,MEP,MEP,MEP,
484	export_D11 HSC SC3_Vi1.csv	D11	SC3	Vi	HSC	HSC_SLAM	TT22	22	48	267	149320	109369	0.456378	502.951	91.6226	117.085	15883.4	-113.754	21.9862	5764.78	481.114	134.557	142938	157491	0	1203	4180.44	34046.9	8384.87	18912.4	354.84	0.822855	-4.99987	1	2	0	0	0	ST-HSC,SLAM-HSC,
485	export_D11 HSC SC3_Vi2.csv	D11	SC3	Vi	HSC	HSC_ST	TT22	22	48	267	135266	61420.3	0.385493	8.51882	84.2048	112.657	8961.76	-88.0942	31.1004	3920.66	172.19	175.752	142938	157491	0	1203	4180.44	34046.9	8384.87	18912.4	354.84	-0.775232	-3.04034	2	2	0	0	0	ST-HSC,SLAM-HSC,
486	export_D12 HSC SC3_VC3.csv.1	D12	SC3	VC	HSC	ckit-	TT22	22	48	268	153075	125641	976.651	231.223	87.2304	90.9798	3508.37	142.113	62.6087	2.66971	69.003	116.857	177605	95845	47189.5	6764.4	8810.09	51582.6	9428.99	1176.44	389.012	4.09173	3.56647	1	2	0	0	0	ckit-,ckit-,
487	export_D12 HSC SC3_VC3.csv.2	D12	SC3	VC	HSC	ckit-	TT22	22	48	268	137713	110220	963.184	1199.44	63.3323	50.3129	3325.31	138.573	36.6987	37.6196	124.382	163.125	177605	95845	47189.5	6764.4	8810.09	51582.6	9428.99	1176.44	389.012	5.608	0.53628	1	2	0	0	0	ckit-,ckit-,
488	export_D12 HSC SC3_Vi1.csv.1	D12	SC3	Vi	HSC	HSC_SLAM	TT22	22	48	269	113902	81191.9	-0.114939	1802.38	55.7325	114.759	22612.8	-20.2904	-5.17349	4076.65	330.26	137.381	145732	66397.2	-29.75	-427.914	3269.23	42555.9	13807.7	12261.5	-44.4352	1.52152	-5.42749	1	2	0	0	0	SLAM-HSC,SLAM-HSC,
489	export_D12 HSC SC3_Vi1.csv.2	D12	SC3	Vi	HSC	HSC_SLAM	TT22	22	48	269	110190	79641.8	-0.174567	2103.11	19.9308	168.003	22159.9	-22.9184	-16.5789	3281.09	323.942	212.412	145732	66397.2	-29.75	-427.914	3269.23	42555.9	13807.7	12261.5	-44.4352	1.53971	-5.46618	1	2	0	0	0	SLAM-HSC,SLAM-HSC,
490	export_D2 MPP SC2_VC0.csv	D2	SC2	VC	MPP	MPP	TT22	22	48	270	137423	120551	10107.9	92.2504	808.923	843.756	34523.8	101.012	122.095	335.038	439.535	56.0458	164245	64615.8	60810.2	9139.99	3399.91	30973	665.437	11796.4	944.248	-3.84772	-0.124579	1	1	0	0	0	MPP,
491	export_D2 MPP SC2_Vi0.csv	D2	SC2	Vi	MPP	ckit+SCA1-	TT22	22	48	271	146536	130594	2.69187	43.1019	514.609	137.343	29947.7	108.062	71.5489	27.7898	848.426	114.931	157504	75792.3	7.14	916.529	4099.83	38135.9	188.775	2604.17	1274.41	-2.76837	0.486292	1	1	0	0	0	MEP,
492	export_D3 ST-HSC SC2_CF2.csv.1	D3	SC2	CF	ST-HSC	HSC_ST	TT22	22	48	272	122529	89411.5	4354.16	124.77	168.745	148.792	47.2813	55.5815	92.2154	281.09	311.58	99.5333	161800	82897.8	103155	3456.7	5927.75	-23.385	1124.81	34468.5	139.113	-0.126545	0.233921	1	2	0	0	0	ST-HSC,ST-HSC,
493	export_D3 ST-HSC SC2_CF2.csv.2	D3	SC2	CF	ST-HSC	HSC_ST	TT22	22	48	272	122075	87321.7	4736.73	144.473	189.007	75.0291	51.7647	91.0465	54.4728	294.877	464.356	174.807	161800	82897.8	103155	3456.7	5927.75	-23.385	1124.81	34468.5	139.113	0.336077	0.255008	1	2	0	0	0	ST-HSC,ST-HSC,
494	export_D3 ST-HSC SC2_CV3.csv.1	D3	SC2	CV	ST-HSC	ckit+SCA1-	TT22	22	48	273	147976	87193.5	2404.42	125.737	136.028	433.708	3427.05	87.6555	58.7299	-3.36524	683.436	79.132	148990	57843.5	53586.9	7611.53	4806.95	11813.4	-842.855	2738.3	290.739	-2.15623	3.42316	1	2	0	0	0	GMP,GMP,
495	export_D3 ST-HSC SC2_CV3.csv.2	D3	SC2	CV	ST-HSC	ckit+SCA1-	TT22	22	48	273	156764	110980	2482.05	36.9618	102.729	561.733	3565.69	249.692	47.2732	-11.7014	824.331	109.19	148990	57843.5	53586.9	7611.53	4806.95	11813.4	-842.855	2738.3	290.739	-2.05228	3.25231	1	2	0	0	0	GMP,GMP,
496	export_D4 ST-HSC SC2_CV2.csv	D4	SC2	CV	ST-HSC	ckit+SCA1-	TT22	22	48	274	117348	101017	5163.77	79.2869	129.67	776.182	6223.92	123.792	97.5458	-6.00381	518.919	184.387	171303	85406.3	94788.3	5860.57	6955.79	15568.3	-1016.95	1508.56	534.6	-2.81804	3.39419	1	1	0	0	0	GMP,
497	export_D4 ST-HSC SC2_VC2.csv.1	D4	SC2	VC	ST-HSC	ckit+SCA1-	TT22	22	48	275	113228	83624.7	2948.29	69.9612	113.054	938.32	11616.7	60.264	47.0927	-4.25973	267.576	46.3203	156871	76810.9	42386.6	8009.7	4964.89	35989.2	-182.501	1398.11	156.297	-3.10262	3.7037	1	3	0	0	0	GMP,GMP,
498	export_D4 ST-HSC SC2_VC2.csv.2	D4	SC2	VC	ST-HSC	ckit+SCA1-	TT22	22	48	275	71624.3	67008.5	2792.6	66.9157	61.7091	731.327	9655.62	59.6306	49.2696	-25.4989	300.02	137.535	156871	76810.9	42386.6	8009.7	4964.89	35989.2	-182.501	1398.11	156.297	-2.61452	3.82061	1	3	0	0	0	GMP,GMP,GMP,
499	export_D4 ST-HSC SC2_VC2.csv.3	D4	SC2	VC	ST-HSC	ckit+SCA1-	TT22	22	48	275	75532.5	62780	2590.18	12.5847	125.354	980.25	9531.28	70.5191	54.0973	17.8418	234.328	188.814	156871	76810.9	42386.6	8009.7	4964.89	35989.2	-182.501	1398.11	156.297	-3.40419	3.65278	1	3	0	0	0	GMP,GMP,GMP,
500	export_D4 ST-HSC SC2_Vi3.csv.1	D4	SC2	Vi	ST-HSC	ckit+SCA1-	TT22	22	48	276	93653.6	84443.5	1.59073	265.545	70.1764	374.879	4058.61	96.2155	37.1272	2.87113	483.021	19.5865	158051	76279	9.52	1527.95	4706.15	40301.4	1730.37	1426.78	26.7151	3.02504	1.87262	1	7	0	0	0	GMP,GMP,
501	export_D4 ST-HSC SC2_Vi3.csv.2	D4	SC2	Vi	ST-HSC	ckit+SCA1-	TT22	22	48	276	110480	75632.1	1.08631	58.3573	91.7066	411.902	5230.94	93.0028	58.4915	16.5917	799.217	50.3784	158051	76279	9.52	1527.95	4706.15	40301.4	1730.37	1426.78	26.7151	-1.75333	3.31536	1	7	0	0	0	MEP,GMP,GMP,
502	export_D4 ST-HSC SC2_Vi3.csv.3	D4	SC2	Vi	ST-HSC	ckit+SCA1-	TT22	22	48	276	91892.3	64374.8	0.577503	90.0468	125.857	274.724	4803.02	145.796	43.8633	1.3583	444.544	61.1622	158051	76279	9.52	1527.95	4706.15	40301.4	1730.37	1426.78	26.7151	-0.973741	3.75028	2	7	0	0	0	GMP,MEP,GMP,GMP,
503	export_D4 ST-HSC SC2_Vi3.csv.4	D4	SC2	Vi	ST-HSC	ckit+SCA1-	TT22	22	48	276	125099	94736.3	11.0005	105.502	87.828	653.286	4881.97	21.9663	46.5046	58.9656	538.391	126.777	158051	76279	9.52	1527.95	4706.15	40301.4	1730.37	1426.78	26.7151	-2.82302	2.8443	3	7	0	0	0	GMP,GMP,MEP,GMP,GMP,
504	export_D4 ST-HSC SC2_Vi3.csv.5	D4	SC2	Vi	ST-HSC	ckit+SCA1-	TT22	22	48	276	99392.3	75248.1	6.22273	49.7759	72.3399	401.792	4609.8	149.175	75.7059	9.44415	547.572	137.49	158051	76279	9.52	1527.95	4706.15	40301.4	1730.37	1426.78	26.7151	-1.73291	3.34802	3	7	0	0	0	GMP,GMP,GMP,MEP,GMP,GMP,
505	export_D4 ST-HSC SC2_Vi3.csv.6	D4	SC2	Vi	ST-HSC	ckit+SCA1-	TT22	22	48	276	90122.9	70424.4	1.31139	49.0498	55.9923	518.761	4326.84	26.4762	58.6408	12.2996	487.284	188.68	158051	76279	9.52	1527.95	4706.15	40301.4	1730.37	1426.78	26.7151	-1.88253	3.36204	3	7	0	0	0	MEP,GMP,GMP,GMP,MEP,GMP,GMP,
506	export_D4 ST-HSC SC2_Vi3.csv.7	D4	SC2	Vi	ST-HSC	ckit+SCA1-	TT22	22	48	276	129287	82657.9	1.48098	79.9632	191.877	240.55	4250.34	82.2039	39.8873	8.37725	486.195	223.77	158051	76279	9.52	1527.95	4706.15	40301.4	1730.37	1426.78	26.7151	-0.867439	3.51998	4	7	0	0	0	MEP,GMP,GMP,GMP,MEP,GMP,GMP,
507	export_D5 HSC SC2_CF1.csv.1	D5	SC2	CF	HSC	HSC_SLAM	TT22	22	48	277	97201	65605.2	7467.36	732.44	39.6903	139.542	37.4284	-32.8169	13.0796	3297.92	427.383	44.9572	159969	67868.1	60528.2	410.578	2684.68	8.45847	9110.29	24578.1	41.5265	0.973403	-4.91675	1	2	0	0	0	SLAM-HSC,SLAM-HSC,
508	export_D5 HSC SC2_CF1.csv.2	D5	SC2	CF	HSC	HSC_SLAM	TT22	22	48	277	97359.3	61026.6	7912.43	588.973	98.6234	124.651	17.6454	-6.68224	9.00145	3769.31	563.993	127.471	159969	67868.1	60528.2	410.578	2684.68	8.45847	9110.29	24578.1	41.5265	0.961405	-5.01791	1	2	0	0	0	SLAM-HSC,SLAM-HSC,
509	export_D5 HSC SC2_CV2.csv.1	D5	SC2	CV	HSC	HSC_ST	TT22	22	48	278	113431	73558.9	4619.66	76.692	196.668	96.7556	4715.22	58.88	57.8693	881.471	501.22	102.943	147912	72273.5	79358.7	2647.41	7456.53	12330.7	6837.22	26244.7	374.896	-0.280267	-1.13358	1	3	0	0	0	SLAM-HSC,ST-HSC,
510	export_D5 HSC SC2_CV2.csv.2	D5	SC2	CV	HSC	HSC_SLAM	TT22	22	48	278	142673	101821	4666.57	534.639	159.801	82.4193	4935.21	125.819	68.6388	270.379	663.353	177.731	147912	72273.5	79358.7	2647.41	7456.53	12330.7	6837.22	26244.7	374.896	2.1176	-0.887165	2	3	0	0	0	ST-HSC,SLAM-HSC,ST-HSC,
511	export_D5 HSC SC2_CV2.csv.3	D5	SC2	CV	HSC	HSC_ST	TT22	22	48	278	151370	88698.2	4863.98	267.664	112.464	19.3243	5047.78	141.394	50.7109	657.714	383.782	187.236	147912	72273.5	79358.7	2647.41	7456.53	12330.7	6837.22	26244.7	374.896	0.704181	-1.3759	3	3	0	0	0	ST-HSC,SLAM-HSC,ST-HSC,
512	export_D6 HSC SC2_VC0.csv	D6	SC2	VC	HSC	HSC_SLAM	TT22	22	48	279	101373	47793.7	8605.78	315.324	217.017	410.795	27512.5	-139.905	-4.1185	5424.86	525.929	129.779	173136	99769.6	78098.5	1298.27	4407.21	41949.9	16054.7	49985.8	289.2	-0.321195	-4.2409	1	1	0	0	0	SLAM-HSC,
513	export_D6 HSC SC2_Vi1.csv	D6	SC2	Vi	HSC	HSC_SLAM	TT22	22	48	280	105893	85745	0.472481	321.436	139	69.1666	15232.2	18.5676	68.9372	1629.59	459.75	206.756	142479	75091.4	13.09	302.095	3032.67	31627.9	5410.63	11177.5	-14.9463	0.642901	-3.55704	1	1	0	0	0	SLAM-HSC,
514	export_D7 MPP SC3_CV5.csv	D7	SC3	CV	MPP	ckit+SCA1-	TT22	22	48	281	116964	74337	601.747	141.666	75.3601	9684.23	750.883	-322.95	22.7021	-11.8059	187.005	80.6647	181218	96705.4	86505.9	6858.34	6106.81	17991.2	1001.41	7715.92	2418.43	-6.1238	4.07704	1	1	0	0	0	GMP,
515	export_D7 MPP SC3_VC2.csv.1	D7	SC3	VC	MPP	SLAM+Flt3+	TT22	22	48	282	108262	115002	3299.32	638.792	491.868	295.912	9887.3	-23.8512	51.935	4920.9	234.931	3.89027	189337	116620	75438.9	1852.17	4736.65	35369.3	-333.951	35306.3	1820.19	-0.955091	-4.61134	1	2	0	0	0	MPP,SLAM+FLT3+,
516	export_D7 MPP SC3_VC2.csv.2	D7	SC3	VC	MPP	ckit-	TT22	22	48	282	102917	105663	3706.13	-24.6847	917.763	304.731	10863.5	-94.8784	73.2683	4153.86	145.169	152.191	189337	116620	75438.9	1852.17	4736.65	35369.3	-333.951	35306.3	1820.19	-1.64237	-2.61065	2	2	0	0	0	MPP,SLAM+FLT3+,
517	export_D7 MPP SC3_Vi2.csv	D7	SC3	Vi	MPP	MPP	TT22	22	48	283	101667	58683.1	5.37042	187.193	1218.51	334.639	6817.9	19.6801	59.2631	471.889	237.007	30.1065	179060	140826	4.76	8161.43	4892.21	60260.4	493.368	5459	3719.1	-2.79798	-2.78336	1	1	0	0	0	MPP,
518	export_D9 ST-HSC SC3_CV5.csv	D9	SC3	CV	ST-HSC	SLAM+Flt3+	TT22	22	48	284	84905.4	93971.8	435.62	199509	18054.2	4893.44	226.321	37544.5	-4902.64	24620.6	360.086	111.097	134945	77974.8	73273.1	3001.28	4261.29	15884.6	971.03	54193.6	403.52	-1.40413	-5.25983	1	1	0	0	0	SLAM+FLT3+,
519	export_D9 ST-HSC SC3_VC2.csv	D9	SC3	VC	ST-HSC	HSC_ST	TT22	22	48	285	123871	87066.6	2620.23	-37.3325	177.266	157.911	7937.62	-86.1243	44.7864	5186.87	230.839	120.488	158596	78114	44302.5	1007.54	5221.57	26226.8	-22.946	22452.7	287.951	-1.00586	-2.93427	1	1	0	0	0	ST-HSC,
520	export_E1 MPP SC2_VC1.csv	E1	SC2	VC	MPP	ckit+SCA1-	TT22	22	48	286	113817	68492.5	4771.67	32.2398	428.895	310.749	14466.3	92.1639	54.8627	39.4567	622.893	44.7109	173840	134618	61596.8	6489.08	11412.8	50992.7	-170.051	1443.87	1736.28	-3.00002	0.822355	1	1	0	0	0	GMP,
521	export_E1 MPP SC2_Vi1.csv.1	E1	SC2	Vi	MPP	MPP	TT22	22	48	287	124427	103538	10.3136	153.875	829.138	45.2549	30014	88.8301	78.4531	498.171	491.54	33.4609	218135	121572	-14.28	2891.36	4887.88	61188.9	936.186	17630.2	2221.69	-2.5114	-0.951432	1	2	0	0	0	MPP,MPP,
522	export_E1 MPP SC2_Vi1.csv.2	E1	SC2	Vi	MPP	MPP	TT22	22	48	287	112086	69121.6	21.0198	12.3624	721.245	258.927	27718.2	54.8543	99.3222	676.376	492.846	74.9837	218135	121572	-14.28	2891.36	4887.88	61188.9	936.186	17630.2	2221.69	-2.50745	-1.87399	1	2	0	0	0	MPP,MPP,
523	export_E10 ST-HSC SC3_CF1.csv	E10	SC3	CF	ST-HSC	MPP	TT22	22	48	288	129923	101381	6950.55	70.0584	470.468	169.893	104.053	-335.761	10.3177	9108.33	212.538	149.297	133649	59625	62971.2	1294.23	4369.13	-5.21907	-108.618	22050.9	407.434	-0.930416	-3.21262	1	1	0	0	0	MPP,
524	export_E10 ST-HSC SC3_CV5.csv	E10	SC3	CV	ST-HSC	SLAM+Flt3+	TT22	22	48	289	70910.4	73854.8	548.701	192672	24281.1	4949.67	271.373	45997.8	-5253.45	36105.9	189.616	77.0577	128122	55465.9	53617.8	3500.83	2003.82	13407.5	1078.05	28205.7	389.79	-1.39056	-5.26751	1	1	0	0	0	SLAM+FLT3+,
525	export_E11 HSC SC3_CV1.csv.1	E11	SC3	CV	HSC	HSC_SLAM	TT22	22	48	290	87798.3	97797.5	7024.69	453.727	140.817	418.12	7094.32	64.6899	47.0734	3576.64	484.291	26.626	127560	70517	63297.3	467.29	4969.95	10512.4	3880.49	5589.68	377.988	0.161337	-4.59478	1	2	0	0	0	SLAM-HSC,SLAM-HSC,
526	export_E11 HSC SC3_CV1.csv.2	E11	SC3	CV	HSC	HSC_SLAM	TT22	22	48	290	150985	108692	6537.81	1173.19	154.978	340.456	7347.04	111.056	62.9335	3616.43	447.995	159.741	127560	70517	63297.3	467.29	4969.95	10512.4	3880.49	5589.68	377.988	0.886862	-5.51401	1	2	0	0	0	SLAM-HSC,SLAM-HSC,
527	export_E11 HSC SC3_Vi1.csv.1	E11	SC3	Vi	HSC	HSC_SLAM	TT22	22	48	291	151672	99744.5	-0.54744	2389.72	73.5839	224.808	16829.7	76.6405	24.2193	554.756	381.306	131.649	142052	92599.9	-8.33	9033.48	2433.62	54158.9	3172.32	43957.7	392.09	3.27749	-2.43589	1	2	0	0	0	SLAM-HSC,SLAM-HSC,
528	export_E11 HSC SC3_Vi1.csv.2	E11	SC3	Vi	HSC	HSC_SLAM	TT22	22	48	291	99885.2	85283.1	0.848	1048.09	123.608	197.115	13443.2	37.1872	46.8922	322.951	302.6	160.85	142052	92599.9	-8.33	9033.48	2433.62	54158.9	3172.32	43957.7	392.09	3.12402	-1.66689	1	2	0	0	0	SLAM-HSC,SLAM-HSC,
529	export_E12 HSC SC3_CF2.csv.1	E12	SC3	CF	HSC	ckit+SCA1-	TT22	22	48	292	134077	106797	3626.54	594.067	105.843	62.8554	70.143	211.204	64.759	49.1952	501.575	75.3159	226967	142890	115691	1595.43	6523.69	-16.3881	5160.68	1030.87	156.239	4.35934	1.03235	1	4	0	0	0	SLAM+MEP,SLAM+MEP,
530	export_E12 HSC SC3_CF2.csv.2	E12	SC3	CF	HSC	ckit+SCA1-	TT22	22	48	292	134184	114074	3779.44	570.219	104.127	130.506	71.2064	124.135	65.3449	13.4905	421.91	121.201	226967	142890	115691	1595.43	6523.69	-16.3881	5160.68	1030.87	156.239	4.31091	1.28679	1	4	0	0	0	MEP,SLAM+MEP,SLAM+MEP,
531	export_E12 HSC SC3_CF3.csv.1	E12	SC3	CF	HSC	ckit+SCA1-	TT22	22	48	292	132011	67394	2056.14	138.934	92.1184	101.668	57.5798	93.3185	56.5822	25.0961	310.857	91.3922	226967	142890	115691	1595.43	6523.69	-16.3881	5160.68	1030.87	156.239	1.40655	3.18945	2	4	0	0	0	MEP,MEP,SLAM+MEP,SLAM+MEP,
532	export_E12 HSC SC3_CF3.csv.2	E12	SC3	CF	HSC	ckit+SCA1-	TT22	22	48	292	134805	59772	2059.68	139.187	80.7138	40.7536	41.5178	137.446	72.0528	-13.7222	366.567	198.248	226967	142890	115691	1595.43	6523.69	-16.3881	5160.68	1030.87	156.239	1.98059	3.30956	2	4	0	0	0	MEP,MEP,SLAM+MEP,SLAM+MEP,
533	export_E12 HSC SC3_CV3.csv	E12	SC3	CV	HSC	ckit-	TT22	22	48	293	110640	72003.4	2333.6	496.167	112.662	90.2146	2357.18	106.151	22.3418	-9.86033	144.401	202.961	160395	69250.9	78908.9	4023.83	7067.64	11916.2	6321.46	570.754	67.7367	4.83107	2.38671	1	1	0	0	0	ckit-,
534	export_E2 MPP SC2_CV1.csv	E2	SC2	CV	MPP	MPP	TT22	22	48	294	90670.7	66826.3	7150.62	56.6124	589.877	297.809	9093.24	116.629	21.2992	147.536	252.361	74.1093	159023	94996.5	86320.2	8306.74	5311.27	12537.4	470.601	16056.2	1181.69	-2.98006	-0.0652958	1	1	0	0	0	MPP,
535	export_E3 ST-HSC SC2_CF2.csv.1	E3	SC2	CF	ST-HSC	ckit+SCA1-	TT22	22	48	295	110000	69940.8	4443.67	75.7236	66.0267	1378.1	26.6426	48.4956	34.9054	13.1271	224.012	46.3238	172053	96388.8	87907.7	7192.69	6383.49	34.0626	-685.259	2421.94	168.061	-3.51614	3.72953	1	3	0	0	0	GMP,GMP,
536	export_E3 ST-HSC SC2_CF2.csv.2	E3	SC2	CF	ST-HSC	ckit+SCA1-	TT22	22	48	295	129713	80697.7	4595.17	19.0241	98.9366	1666.24	19.7855	-15.093	38.8149	30.2113	165.906	96.6262	172053	96388.8	87907.7	7192.69	6383.49	34.0626	-685.259	2421.94	168.061	-3.73408	3.73688	1	3	0	0	0	GMP,GMP,GMP,
537	export_E3 ST-HSC SC2_CF2.csv.3	E3	SC2	CF	ST-HSC	ckit+SCA1-	TT22	22	48	295	88926.5	48161.7	4555.2	10.5031	88.0128	1392.73	56.0336	65.5924	34.4964	24.7918	409.515	162.163	172053	96388.8	87907.7	7192.69	6383.49	34.0626	-685.259	2421.94	168.061	-3.26966	3.23552	1	3	0	0	0	GMP,GMP,GMP,
538	export_E3 ST-HSC SC2_Vi2.csv.1	E3	SC2	Vi	ST-HSC	ckit+SCA1-	TT22	22	48	296	148284	100985	0.907008	63.0627	87.9512	3502.09	9645.18	90.74	43.1185	67.6037	614.272	13.7806	180520	133617	-27.37	10945	7782.96	50361.3	1104.73	1694.53	108.859	-4.55859	3.39942	1	2	0	0	0	GMP,GMP,
539	export_E3 ST-HSC SC2_Vi2.csv.2	E3	SC2	Vi	ST-HSC	ckit+SCA1-	TT22	22	48	296	167710	104026	1.8514	97.0746	106.301	2340.8	9486.69	138.501	45.6601	14.5253	427.899	82.4205	180520	133617	-27.37	10945	7782.96	50361.3	1104.73	1694.53	108.859	-4.11052	3.47605	1	2	0	0	0	GMP,GMP,
540	export_E4 ST-HSC SC2_CF3.csv.1	E4	SC2	CF	ST-HSC	ckit+SCA1-	TT22	22	48	297	99355.4	63121.1	1836.86	88.6251	110.509	130.685	24.5505	51.4432	16.1957	11.83	226.234	67.4272	158522	68520.2	79838.3	4097.63	8232.79	16.6568	1044.71	1621.05	112.947	0.660308	3.26122	1	2	0	0	0	MEP,MEP,
541	export_E4 ST-HSC SC2_CF3.csv.2	E4	SC2	CF	ST-HSC	ckit+SCA1-	TT22	22	48	297	119635	55464.7	1888.14	37.7207	80.6255	126.998	17.9025	57.0617	15.3983	11.5407	312.396	80.8817	158522	68520.2	79838.3	4097.63	8232.79	16.6568	1044.71	1621.05	112.947	0.541863	3.26583	1	2	0	0	0	MEP,MEP,
542	export_E4 ST-HSC SC2_CV2.csv.1	E4	SC2	CV	ST-HSC	ckit+SCA1-	TT22	22	48	298	77393.9	88572.8	3744.08	49.3802	82.5854	447.22	3178.92	139.254	52.2917	49.2856	331.182	111.458	162200	78952.9	72074.7	7719.73	6781.23	10951.2	-1702.41	2495.55	236.951	-1.89716	3.19506	1	3	0	0	0	GMP,GMP,
543	export_E4 ST-HSC SC2_CV2.csv.2	E4	SC2	CV	ST-HSC	ckit+SCA1-	TT22	22	48	298	115789	105455	4584.69	25.5507	86.49	451.788	4141.07	107.367	74.2799	30.1783	532.242	174.16	162200	78952.9	72074.7	7719.73	6781.23	10951.2	-1702.41	2495.55	236.951	-1.7907	3.23361	1	3	0	0	0	GMP,GMP,GMP,
544	export_E4 ST-HSC SC2_CV2.csv.3	E4	SC2	CV	ST-HSC	ckit+SCA1-	TT22	22	48	298	140694	112358	4539.88	113.441	81.3334	560.716	4066.11	189.462	59.1788	-28.0454	472.966	197.838	162200	78952.9	72074.7	7719.73	6781.23	10951.2	-1702.41	2495.55	236.951	-2.33475	3.73525	1	3	0	0	0	GMP,GMP,GMP,
545	export_E4 ST-HSC SC2_VC2.csv	E4	SC2	VC	ST-HSC	ckit+SCA1-	TT22	22	48	299	103532	99390	2790.35	106.044	90.6095	180.746	5796.01	114.313	58.1021	8.8994	340.403	135.528	181721	109693	70913.3	483.369	10418.6	22156	1560.89	6364.69	-8.24033	-0.104705	3.61496	1	5	0	0	0	MEP,MEP,
546	export_E4 ST-HSC SC2_VC3.csv.1	E4	SC2	VC	ST-HSC	ckit+SCA1-	TT22	22	48	299	108119	100397	1594.54	175.53	90.9939	109.42	3659.37	26.1722	60.3034	13.5484	418.229	28.1374	181721	109693	70913.3	483.369	10418.6	22156	1560.89	6364.69	-8.24033	1.75772	3.07592	1	5	0	0	0	MEP,MEP,MEP,
547	export_E4 ST-HSC SC2_VC3.csv.2	E4	SC2	VC	ST-HSC	ckit+SCA1-	TT22	22	48	299	82588.9	50364.4	1398.96	119.939	74.2945	118.796	3177.88	69.2127	38.2626	35.0471	297.003	29.301	181721	109693	70913.3	483.369	10418.6	22156	1560.89	6364.69	-8.24033	1.13493	3.13047	1	5	0	0	0	MEP,MEP,MEP,MEP,
548	export_E4 ST-HSC SC2_VC3.csv.3	E4	SC2	VC	ST-HSC	ckit+SCA1-	TT22	22	48	299	114884	59587.3	1689.99	77.1571	43.7375	84.853	3936.01	21.6884	51.0806	22.5271	390.95	38.3263	181721	109693	70913.3	483.369	10418.6	22156	1560.89	6364.69	-8.24033	0.934018	3.21657	1	5	0	0	0	MEP,MEP,MEP,MEP,MEP,
549	export_E4 ST-HSC SC2_VC3.csv.4	E4	SC2	VC	ST-HSC	ckit+SCA1-	TT22	22	48	299	102707	66541.3	1512.13	118.498	94.2573	93.3603	3538.75	101.159	29.1059	9.84439	387.696	133.551	181721	109693	70913.3	483.369	10418.6	22156	1560.89	6364.69	-8.24033	1.22605	3.28838	1	5	0	0	0	MEP,MEP,MEP,MEP,MEP,
550	export_E4 ST-HSC SC2_Vi2.csv	E4	SC2	Vi	ST-HSC	ckit+SCA1-	TT22	22	48	300	70784.7	54850.9	1.03229	69.4007	290.192	90.8213	13208.8	78.088	33.4719	76.0342	371.074	56.9078	163579	74408.3	34.51	3983.61	6025.54	35141.1	426.748	1612.8	478.345	0.148992	1.93406	1	1	0	0	0	MEP,
551	export_E5 HSC SC2_VC3.csv	E5	SC2	VC	HSC	ckit+SCA1-	TT22	22	48	301	135274	79200.1	1402.45	766.285	125.947	203.149	4550.87	111.691	57.1601	18.7956	215.746	157.255	158784	75844.7	56084.7	8687.16	6307.44	31631.6	2990.81	1209.98	-24.7871	5.34328	1.37816	1	1	0	0	0	SLAM+MEP,
552	export_E6 HSC SC2_VC2.csv.1	E6	SC2	VC	HSC	HSC_SLAM	TT22	22	48	302	161239	112237	2769.9	512.778	103.258	110.75	8046.36	57.9576	54.0182	1540.66	369.874	129.953	165908	75437.7	44066.9	1655.54	2859.94	24241.8	22471.3	26811.8	-69.3562	1.07857	-3.50828	1	3	0	0	0	SLAM-HSC,SLAM-HSC,
553	export_E6 HSC SC2_VC2.csv.2	E6	SC2	VC	HSC	HSC_SLAM	TT22	22	48	302	166254	158308	2812.55	2245.19	54.5363	76.9943	8637.92	106.147	45.3494	1026.36	281.08	136.94	165908	75437.7	44066.9	1655.54	2859.94	24241.8	22471.3	26811.8	-69.3562	2.92618	-2.97086	1	3	0	0	0	SLAM-HSC,SLAM-HSC,SLAM-HSC,
554	export_E6 HSC SC2_VC2.csv.3	E6	SC2	VC	HSC	HSC_SLAM	TT22	22	48	302	166558	107574	2613.95	1245.91	146.464	83.606	7485.1	38.4777	17.6527	1471.16	289.029	159.481	165908	75437.7	44066.9	1655.54	2859.94	24241.8	22471.3	26811.8	-69.3562	1.82037	-3.40053	1	3	0	0	0	SLAM-HSC,SLAM-HSC,SLAM-HSC,
555	export_E7 MPP SC3_VC5.csv.1	E7	SC3	VC	MPP	ckit-	TT22	22	48	303	148767	148311	506.338	43.877	84.2921	11067	1136.64	322.209	60.9222	141.138	54.4408	77.2677	190939	111492	89165.5	7427.25	4575.51	28871.8	-100.248	568.82	4298.27	-6.0373	3.76403	1	5	0	0	0	MyP,MyP,
556	export_E7 MPP SC3_VC5.csv.2	E7	SC3	VC	MPP	ckit-	TT22	22	48	303	109844	120656	474.394	96.1966	90.0104	5990.59	1079.41	173.7	71.619	49.7382	57.8176	114.199	190939	111492	89165.5	7427.25	4575.51	28871.8	-100.248	568.82	4298.27	-5.88539	4.07025	1	5	0	0	0	MyP,MyP,MyP,
557	export_E7 MPP SC3_VC5.csv.3	E7	SC3	VC	MPP	ckit-	TT22	22	48	303	125888	114108	431.819	208.491	105.482	13784.5	1059.42	-502.118	33.0752	10.8293	49.6267	140.525	190939	111492	89165.5	7427.25	4575.51	28871.8	-100.248	568.82	4298.27	-6.37061	4.03787	1	5	0	0	0	MyP,MyP,MyP,MyP,
558	export_E7 MPP SC3_VC5.csv.4	E7	SC3	VC	MPP	ckit-	TT22	22	48	303	169443	110596	469.611	92.3467	111.445	9746.35	1097.45	33.661	56.4054	-16.7145	61.5016	156.765	190939	111492	89165.5	7427.25	4575.51	28871.8	-100.248	568.82	4298.27	-6.08083	4.1211	1	5	0	0	0	MyP,MyP,MyP,MyP,MyP,
559	export_E7 MPP SC3_VC5.csv.5	E7	SC3	VC	MPP	ckit-	TT22	22	48	303	130907	137746	455.242	-8.26421	107.407	5398.72	1156.71	144.254	60.3578	440.858	49.5366	157.708	190939	111492	89165.5	7427.25	4575.51	28871.8	-100.248	568.82	4298.27	-5.53295	3.14027	1	5	0	0	0	MyP,MyP,MyP,MyP,MyP,
560	export_E8 MPP SC3_VC2.csv	E8	SC3	VC	MPP	ckit-	TT22	22	48	304	122298	79002.8	1920.46	191.527	1046.79	744.362	6228.31	2.95172	52.9349	1818.61	117.228	75.6073	178639	92665.3	87707.8	6569.5	3711.42	39546.1	2024.81	27730.4	3662.37	-2.11646	-3.94577	1	1	0	0	0	MPP,
561	export_E9 ST-HSC SC3_CF1.csv.1	E9	SC3	CF	ST-HSC	HSC_SLAM	TT22	22	48	305	102841	74659.4	6421.84	451.602	76.1714	129.618	63.6979	71.7675	46.8168	1994.08	165.857	106.369	136980	71711.8	85534.8	2410.84	3298.55	32.0987	1253.84	14421.3	274.78	0.783574	-4.04478	1	2	0	0	0	SLAM-HSC,SLAM-HSC,
562	export_E9 ST-HSC SC3_CF1.csv.2	E9	SC3	CF	ST-HSC	HSC_SLAM	TT22	22	48	305	72731.2	64435.5	6097.5	519.666	111.126	86.5603	60.0564	70.2229	11.8869	1537.7	210.972	192.903	136980	71711.8	85534.8	2410.84	3298.55	32.0987	1253.84	14421.3	274.78	1.32671	-3.60405	1	2	0	0	0	SLAM-HSC,SLAM-HSC,
563	export_E9 ST-HSC SC3_VC2.csv.1	E9	SC3	VC	ST-HSC	HSC_ST	TT22	22	48	306	91456.5	100492	2908.66	74.9947	119.66	9252.23	9082.03	-365.093	35.6508	792.057	169.614	46.0773	180614	83133.4	76588.4	6129.91	2944.38	47017.4	1394.44	2409.65	-82.4482	-5.50505	2.95387	1	2	0	0	0	ST-HSC,ST-HSC,
564	export_E9 ST-HSC SC3_VC2.csv.2	E9	SC3	VC	ST-HSC	HSC_ST	TT22	22	48	306	98673.5	116004	2956.18	18.8494	98.8738	6853.84	8931.64	29.9527	53.9035	235.908	174.417	175.625	180614	83133.4	76588.4	6129.91	2944.38	47017.4	1394.44	2409.65	-82.4482	-5.60013	3.24706	1	2	0	0	0	ST-HSC,ST-HSC,
565	export_F1 MPP SC2_CV1.csv.1	F1	SC2	CV	MPP	HSC_ST	TT22	22	48	307	136713	100668	6742.77	109.851	187.01	536.69	6602.72	133.385	48.3169	198.259	397.296	14.3974	155912	74690.4	72296.1	6808.25	2276.13	10338	490.798	18044.3	1613.57	-2.32379	1.53761	1	2	0	0	0	MPP,ST-HSC,
566	export_F1 MPP SC2_CV1.csv.2	F1	SC2	CV	MPP	HSC_ST	TT22	22	48	307	123733	93602.1	6012.98	69.9847	265.671	320.82	6095.28	-9.43714	45.2731	371.446	395.19	102.973	155912	74690.4	72296.1	6808.25	2276.13	10338	490.798	18044.3	1613.57	-1.31845	-0.597936	2	2	0	0	0	MPP,ST-HSC,
567	export_F11 HSC SC3_CF2.csv	F11	SC3	CF	HSC	HSC_SLAM	TT22	22	48	308	143383	92081.7	4196.88	658.947	71.3682	86.897	46.1884	50.9722	29.0178	1301.39	207.462	4.20556	141313	65628.5	78918.4	435.765	3617.47	-47.2773	7536.32	11585.1	43.5255	1.36219	-3.6084	1	1	0	0	0	SLAM-HSC,
568	export_F11 HSC SC3_CV3.csv	F11	SC3	CV	HSC	ckit+SCA1-	TT22	22	48	309	145366	112299	1687.2	1026.66	115.38	287.818	2040.24	178.803	65.5515	-21.5777	873.701	159.061	148709	70349.2	59873.7	3971.41	6276.84	13634.7	13361.2	1179.13	-102.051	4.59698	0.698609	1	3	0	0	0	SLAM+MEP,SLAM+MEP,
569	export_F11 HSC SC3_CV4.csv.1	F11	SC3	CV	HSC	ckit+SCA1-	TT22	22	48	309	117870	74467.2	908.649	402.551	55.7966	62.023	1164.73	176.558	53.4944	-13.6741	369.931	49.4731	148709	70349.2	59873.7	3971.41	6276.84	13634.7	13361.2	1179.13	-102.051	2.6991	2.5614	1	3	0	0	0	SLAM+MEP,SLAM+MEP,SLAM+MEP,
570	export_F11 HSC SC3_CV4.csv.2	F11	SC3	CV	HSC	ckit+SCA1-	TT22	22	48	309	120259	82142.7	820.484	244.783	92.7039	177.803	1098.54	106.09	40.9502	6.39866	438.775	140.799	148709	70349.2	59873.7	3971.41	6276.84	13634.7	13361.2	1179.13	-102.051	2.55728	2.46848	1	3	0	0	0	SLAM+MEP,SLAM+MEP,SLAM+MEP,
571	export_F11 HSC SC3_VC1.csv	F11	SC3	VC	HSC	SLAM+Flt3+	TT22	22	48	310	108556	72933.5	6314.18	494.98	304.894	187.075	18195.8	-15.1934	54.195	4235.52	354.492	119.07	161742	70131.5	62570.2	742.436	4203.21	28647.4	9946.42	28281.1	34.5973	-0.226068	-4.69305	1	1	0	0	0	SLAM+FLT3+,
572	export_F12 HSC SC3_CF0.csv	F12	SC3	CF	HSC	HSC_SLAM	TT22	22	48	311	120606	92131.6	17101.6	4175.48	266.958	355.708	220.617	-300.469	-41.323	14125	300.214	149.557	165813	126881	64701.5	936.186	2702.14	-39.7473	32984.5	51703.3	-275.297	1.33877	-6.03745	1	1	0	0	0	SLAM+FLT3+,
573	export_F12 HSC SC3_VC1.csv	F12	SC3	VC	HSC	HSC_SLAM	TT22	22	48	312	162424	146346	5363.82	982.599	232.461	313.917	19187	-413.449	-6.50595	12231.7	472.568	91.8164	152970	71540.4	42693.6	679.128	2870.01	28926.5	9814.15	50955.4	327.66	0.968081	-5.81376	1	1	0	0	0	SLAM-HSC,
574	export_F3 ST-HSC SC2_CV1.csv	F3	SC2	CV	ST-HSC	MPP	TT22	22	48	313	113181	64248	6656.32	101.034	329.899	99.7863	7642.97	52.3834	43.4695	391.081	407.762	65.6049	216436	96557.8	74204.8	-1.66843	6708.32	12440.7	-310.938	13923.2	344.163	-1.1214	-0.34056	1	2	0	0	0	ST-HSC,MPP,
575	export_F3 ST-HSC SC2_CV2.csv	F3	SC2	CV	ST-HSC	HSC_ST	TT22	22	48	313	118166	61002.5	4226.29	9.79091	105.338	98.4871	4603.06	80.5351	29.4596	297.042	231.311	69.7467	216436	96557.8	74204.8	-1.66843	6708.32	12440.7	-310.938	13923.2	344.163	-0.0490894	0.171298	2	2	0	0	0	ST-HSC,MPP,
576	export_F4 ST-HSC SC2_CV1.csv.1	F4	SC2	CV	ST-HSC	ckit+SCA1-	TT22	22	48	314	115046	68913.9	6001.3	27.7821	166.658	284.716	8464	66.6112	61.9468	15.8367	567.948	86.5323	120357	92591.5	50296.5	2997.87	7289.87	11195.1	-79.2873	1726.08	603.98	-1.43436	3.05187	1	2	0	0	0	GMP,MEP,
577	export_F4 ST-HSC SC2_CV1.csv.2	F4	SC2	CV	ST-HSC	ckit+SCA1-	TT22	22	48	314	98099.9	63021.4	5876.32	68.8875	136.637	325.176	8129.37	94.9668	44.5269	7.92038	459.868	193.175	120357	92591.5	50296.5	2997.87	7289.87	11195.1	-79.2873	1726.08	603.98	-1.12438	3.61609	2	2	0	0	0	GMP,MEP,
578	export_F4 ST-HSC SC2_VC1.csv	F4	SC2	VC	ST-HSC	HSC_ST	TT22	22	48	315	116991	71649	4483.42	19.951	177.018	83.9811	13828.1	99.8613	59.4314	246.871	525.85	38.3426	146363	63055.7	50851.1	1571.2	4559.62	24436.9	505.698	3141.91	127.171	-0.772623	-0.0266435	1	1	0	0	0	ST-HSC,
579	export_F5 HSC SC2_CF1.csv.1	F5	SC2	CF	HSC	HSC_ST	TT22	22	48	316	114139	85607.4	8837.11	-124.796	193.889	151.301	151.951	-242.063	84.1782	4354.13	533.517	125.367	147625	71175.1	82731.2	1083.27	3278.9	1.48273	3071.44	16590.4	46.3774	-1.12053	-2.85346	1	2	0	0	0	SLAM-HSC,ST-HSC,
580	export_F5 HSC SC2_CF1.csv.2	F5	SC2	CF	HSC	HSC_SLAM	TT22	22	48	316	129970	94387.6	9094.48	324.298	170.495	139.542	185.588	-18.1733	82.2333	2805.08	488.197	167.002	147625	71175.1	82731.2	1083.27	3278.9	1.48273	3071.44	16590.4	46.3774	0.370221	-3.733	2	2	0	0	0	SLAM-HSC,ST-HSC,
581	export_F5 HSC SC2_VC2.csv.1	F5	SC2	VC	HSC	ckit-	TT22	22	48	317	122239	75060	3080.24	778.608	80.9846	106.64	10178.4	101.352	41.8952	-4.90622	76.8309	41.6738	159605	79593.2	52093.4	3838.48	6217.4	33567	9663.23	9046.84	10.7381	5.22578	2.09473	1	3	0	0	0	SLAM+MEP,ckit-,
582	export_F5 HSC SC2_VC2.csv.2	F5	SC2	VC	HSC	ckit+SCA1-	TT22	22	48	317	99659.6	49600	2857.4	527.518	72.1466	43.3543	9678.02	49.5713	5.42565	12.1657	266.192	61.783	159605	79593.2	52093.4	3838.48	6217.4	33567	9663.23	9046.84	10.7381	4.6178	2.06934	2	3	0	0	0	ckit-,SLAM+MEP,ckit-,
583	export_F5 HSC SC2_VC2.csv.3	F5	SC2	VC	HSC	ckit-	TT22	22	48	317	91406.3	54830.7	2914.1	1038.53	105.474	137.498	9743.96	110.675	19.7772	4.94676	140.812	114.36	159605	79593.2	52093.4	3838.48	6217.4	33567	9663.23	9046.84	10.7381	5.54009	1.17058	3	3	0	0	0	ckit-,SLAM+MEP,ckit-,
584	export_F5 HSC SC2_Vi2.csv.1	F5	SC2	Vi	HSC	ckit+SCA1-	TT22	22	48	318	127575	57061.1	1.26864	79.4141	95.1738	275.713	8024.91	84.656	39.4746	5.52665	419.455	105.469	142715	60741.2	27.37	1885.49	6463.89	32583.6	3033.43	1421.95	222.907	-0.829268	3.7336	1	3	0	0	0	GMP,MEP,
585	export_F5 HSC SC2_Vi2.csv.2	F5	SC2	Vi	HSC	ckit+SCA1-	TT22	22	48	318	98761.7	94214.7	1.45432	114.418	119.594	375.459	7913.03	146.164	26.4768	-15.9439	528.287	119.726	142715	60741.2	27.37	1885.49	6463.89	32583.6	3033.43	1421.95	222.907	-1.42023	3.63807	2	3	0	0	0	GMP,GMP,MEP,
586	export_F5 HSC SC2_Vi2.csv.3	F5	SC2	Vi	HSC	ckit+SCA1-	TT22	22	48	318	115386	54640.5	0.996067	90.2699	92.8743	356.207	7825.83	-29.5033	41.5318	23.946	286.935	193.323	142715	60741.2	27.37	1885.49	6463.89	32583.6	3033.43	1421.95	222.907	-1.3652	3.67294	2	3	0	0	0	GMP,GMP,MEP,
587	export_F6 HSC SC2_CF1.csv.1	F6	SC2	CF	HSC	HSC_SLAM	TT22	22	48	319	160032	76799.1	11118.3	2296.73	20.2208	106.538	42.9419	127.119	24.2864	482.34	640.598	51.5166	111181	85570.5	98885.4	901.913	3908.22	-68.4437	23714.1	11850.8	169.226	3.27282	-2.55923	1	2	0	0	0	SLAM-HSC,SLAM-HSC,
588	export_F6 HSC SC2_CF1.csv.2	F6	SC2	CF	HSC	HSC_SLAM	TT22	22	48	319	135381	77867.8	10223.1	2585.92	111.533	64.2482	46.6789	124.318	4.19783	334.155	338.742	183.615	111181	85570.5	98885.4	901.913	3908.22	-68.4437	23714.1	11850.8	169.226	3.36041	-2.02921	1	2	0	0	0	SLAM-HSC,SLAM-HSC,
589	export_F6 HSC SC2_CV2.csv.1	F6	SC2	CV	HSC	HSC_SLAM	TT22	22	48	320	135582	105301	3376.09	313.949	168.202	89.5213	4264.65	116.559	59.3587	605.661	441.174	27.8494	151051	81146.1	71553.5	4405.15	3155.78	11503.8	4700.88	33277.7	-57.9885	0.727405	-1.45794	1	2	0	0	0	ST-HSC,SLAM-HSC,
590	export_F6 HSC SC2_CV2.csv.2	F6	SC2	CV	HSC	HSC_ST	TT22	22	48	320	93755.3	68964.4	3026.77	125.09	107.504	186.393	3616.73	34.8237	37.958	490.078	390.249	171.015	151051	81146.1	71553.5	4405.15	3155.78	11503.8	4700.88	33277.7	-57.9885	-0.203634	-0.586398	2	2	0	0	0	ST-HSC,SLAM-HSC,
591	export_F6 HSC SC2_Vi2.csv	F6	SC2	Vi	HSC	ckit-	TT22	22	48	321	121160	74145.8	4.77103	574.089	44.214	117.673	11319.8	65.197	29.7129	-10.425	67.3365	170.343	170513	67356.4	11.9	9208.87	4492.36	45866.9	8324.47	5423.53	-123.222	5.10978	2.21858	1	1	0	0	0	ckit-,
592	export_F9 ST-HSC SC3_CF3.csv.1	F9	SC3	CF	ST-HSC	ckit+SCA1-	TT22	22	48	322	118360	98002.8	1565.3	67.8759	135.462	149.839	58.5888	229.275	77.9299	-11.2894	267.31	1.38183	174007	106980	106194	9747.91	7487.72	-11.6249	141.27	3716.96	363.628	0.251206	3.53007	1	4	0	0	0	GMP,MEP,
593	export_F9 ST-HSC SC3_CF3.csv.2	F9	SC3	CF	ST-HSC	ckit+SCA1-	TT22	22	48	322	131809	67696.8	1643.71	64.3849	70.9326	330.925	58.8013	138.986	59.6535	1.83102	198.964	97.399	174007	106980	106194	9747.91	7487.72	-11.6249	141.27	3716.96	363.628	-1.61405	4.11641	2	4	0	0	0	MEP,GMP,MEP,
594	export_F9 ST-HSC SC3_CF3.csv.3	F9	SC3	CF	ST-HSC	ckit+SCA1-	TT22	22	48	322	160640	149665	1544.05	89.564	104.489	133.676	78.8536	195.108	84.1984	-9.70457	301.087	115.39	174007	106980	106194	9747.91	7487.72	-11.6249	141.27	3716.96	363.628	0.330447	3.54709	3	4	0	0	0	GMP,MEP,GMP,MEP,
595	export_F9 ST-HSC SC3_CF3.csv.4	F9	SC3	CF	ST-HSC	ckit+SCA1-	TT22	22	48	322	79758.7	62772.5	1508.55	98.782	61.1483	403.4	43.674	108.021	47.2512	-2.73847	200.259	217.678	174007	106980	106194	9747.91	7487.72	-11.6249	141.27	3716.96	363.628	-1.79935	4.05795	4	4	0	0	0	GMP,MEP,GMP,MEP,
596	export_G1 MPP SC2_Vi1.csv.1	G1	SC2	Vi	MPP	MPP	TT22	22	48	323	101790	75445	1.21274	91.9744	985.596	193.921	25300.5	111.078	24.6412	332.275	264.009	103.393	182016	88665.7	9.52	1440.05	2862.29	48139.7	445.296	42529.6	2763.58	-2.89488	-1.18689	1	2	0	0	0	MPP,MPP,
597	export_G1 MPP SC2_Vi1.csv.2	G1	SC2	Vi	MPP	MPP	TT22	22	48	323	92138.8	67895.7	1.0831	145.721	1121.08	331.195	25279.3	13.644	43.484	333.631	305.63	130.31	182016	88665.7	9.52	1440.05	2862.29	48139.7	445.296	42529.6	2763.58	-3.12365	-1.59931	1	2	0	0	0	MPP,MPP,
598	export_G10 ST-HSC SC3_CF5.csv.1	G10	SC3	CF	ST-HSC	ckit-	TT22	22	48	324	133362	165302	653.987	170.711	97.7022	32844.4	72.3263	-1924.45	-0.979127	-121.951	84.4298	40.3221	208542	174960	91745.4	9711.72	5490.76	-16.4194	742.777	17130.8	578.004	-6.75994	4.06182	1	3	0	0	0	ST-HSC,MyP,
599	export_G10 ST-HSC SC3_CF5.csv.2	G10	SC3	CF	ST-HSC	HSC_ST	TT22	22	48	324	148274	187366	734.72	-45.9114	109.403	35105.8	33.3686	-915.117	-26.9744	128.15	159.07	101.844	208542	174960	91745.4	9711.72	5490.76	-16.4194	742.777	17130.8	578.004	-6.2532	3.7517	2	3	0	0	0	ST-HSC,ST-HSC,MyP,
600	export_G10 ST-HSC SC3_CF5.csv.3	G10	SC3	CF	ST-HSC	ckit-	TT22	22	48	324	121013	132596	656.052	249.743	118.105	56707.1	61.2405	637.774	-222.353	383.666	110.153	137.366	208542	174960	91745.4	9711.72	5490.76	-16.4194	742.777	17130.8	578.004	-6.35379	3.64059	2	3	0	0	0	ST-HSC,ST-HSC,MyP,
601	export_G10 ST-HSC SC3_Vi2.csv.1	G10	SC3	Vi	ST-HSC	HSC_ST	TT22	22	48	325	132892	76741.2	1.81004	56.1243	57.0758	36.3815	11035.6	168.72	33.9961	317.587	271.038	32.177	144817	72277	7.14	-509.025	10063.3	45352.6	2761.51	1062.88	151.922	-0.0371764	-0.113022	1	4	0	0	0	ST-HSC,ST-HSC,
602	export_G10 ST-HSC SC3_Vi2.csv.2	G10	SC3	Vi	ST-HSC	HSC_ST	TT22	22	48	325	128909	68299	5.13266	66.6921	85.7204	91.6152	11250.3	76.08	62.6179	299.664	248.719	54.8576	144817	72277	7.14	-509.025	10063.3	45352.6	2761.51	1062.88	151.922	-0.0236687	-0.0615407	1	4	0	0	0	ST-HSC,ST-HSC,ST-HSC,
603	export_G10 ST-HSC SC3_Vi2.csv.3	G10	SC3	Vi	ST-HSC	HSC_ST	TT22	22	48	325	122961	72255.7	1.8627	226.661	78.8036	82.3811	12729.7	100.53	36.923	464.676	230.014	56.3587	144817	72277	7.14	-509.025	10063.3	45352.6	2761.51	1062.88	151.922	0.463297	-1.24746	1	4	0	0	0	ST-HSC,ST-HSC,ST-HSC,ST-HSC,
604	export_G10 ST-HSC SC3_Vi2.csv.4	G10	SC3	Vi	ST-HSC	HSC_ST	TT22	22	48	325	121792	78471.9	1.05221	157.797	115.509	122.11	11567.6	67.7637	51.5202	450.624	215.056	153.136	144817	72277	7.14	-509.025	10063.3	45352.6	2761.51	1062.88	151.922	0.0609055	-0.794896	1	4	0	0	0	ST-HSC,ST-HSC,ST-HSC,ST-HSC,
605	export_G11 HSC SC3_CV2.csv.1	G11	SC3	CV	HSC	ckit+SCA1-	TT22	22	48	326	129718	81029.2	3079.23	1548.56	41.164	118.517	3181.82	109.446	27.6141	73.2647	297.257	13.142	156362	92380.9	86528.5	7286.84	5209.22	13288.4	10231.5	9013.68	148.253	5.11192	-0.0175389	1	4	0	0	0	SLAM+MEP,SLAM+MEP,
606	export_G11 HSC SC3_CV2.csv.2	G11	SC3	CV	HSC	ckit+SCA1-	TT22	22	48	326	137198	72445.9	2866.61	845.712	64.4143	75.7036	3053.54	163.214	24.8861	19.0359	331.842	119.33	156362	92380.9	86528.5	7286.84	5209.22	13288.4	10231.5	9013.68	148.253	4.94437	0.80844	1	4	0	0	0	SLAM+MEP,SLAM+MEP,SLAM+MEP,
607	export_G11 HSC SC3_CV2.csv.3	G11	SC3	CV	HSC	ckit+SCA1-	TT22	22	48	326	131820	117047	3002.69	1213.1	60.474	83.6381	2933.15	161.061	38.8562	40.9703	271.326	124.622	156362	92380.9	86528.5	7286.84	5209.22	13288.4	10231.5	9013.68	148.253	5.25417	0.262305	1	4	0	0	0	SLAM+MEP,SLAM+MEP,SLAM+MEP,SLAM+MEP,
608	export_G11 HSC SC3_CV2.csv.4	G11	SC3	CV	HSC	ckit+SCA1-	TT22	22	48	326	89736	60555.8	2988	868.163	51.3192	122.814	3151.18	43.1829	36.6895	14.7407	169.556	126.872	156362	92380.9	86528.5	7286.84	5209.22	13288.4	10231.5	9013.68	148.253	5.43921	1.20767	1	4	0	0	0	SLAM+MEP,SLAM+MEP,SLAM+MEP,SLAM+MEP,
609	export_G12 HSC SC3_VC1.csv	G12	SC3	VC	HSC	HSC_ST	TT22	22	48	327	142636	107025	6403.96	160.687	128.935	220.581	14226.5	-301.145	35.1383	8739.06	488.952	85.1646	181228	83068	68857	330.599	3703.14	23365.5	8290.68	29252.1	-264.194	-0.582846	-3.78992	1	1	0	0	0	ST-HSC,
610	export_G12 HSC SC3_Vi4.csv.1	G12	SC3	Vi	HSC	ckit+SCA1-	TT22	22	48	328	125119	75300.7	1.32838	455.851	104.443	80.3915	3384.58	134.05	42.3738	-22.8846	222.723	30.0702	209483	95090.5	5.95	3627.3	10327.3	60274	40487.8	4987.92	-101.264	4.54183	2.3903	1	4	0	0	0	SLAM+MEP,SLAM+MEP,
611	export_G12 HSC SC3_Vi4.csv.2	G12	SC3	Vi	HSC	ckit+SCA1-	TT22	22	48	328	107096	55719.9	1.72712	388.564	95.0255	48.2477	3322.64	68.8022	40.2136	2.76988	152.659	63.4795	209483	95090.5	5.95	3627.3	10327.3	60274	40487.8	4987.92	-101.264	4.27181	2.94413	1	4	0	0	0	SLAM+MEP,SLAM+MEP,SLAM+MEP,
612	export_G12 HSC SC3_Vi4.csv.3	G12	SC3	Vi	HSC	ckit+SCA1-	TT22	22	48	328	122181	59479.1	0.634409	407.786	55.0642	111.283	3384.53	63.9877	60.1404	8.03735	185.573	94.2053	209483	95090.5	5.95	3627.3	10327.3	60274	40487.8	4987.92	-101.264	4.63092	2.38381	1	4	0	0	0	ckit-,SLAM+MEP,SLAM+MEP,SLAM+MEP,
613	export_G12 HSC SC3_Vi4.csv.4	G12	SC3	Vi	HSC	ckit-	TT22	22	48	328	141343	77598.7	1.32119	727.495	66.5553	51.3465	3760.09	137.394	41.3139	21.1967	123.959	182.894	209483	95090.5	5.95	3627.3	10327.3	60274	40487.8	4987.92	-101.264	5.16027	1.98439	2	4	0	0	0	ckit-,SLAM+MEP,SLAM+MEP,SLAM+MEP,
614	export_G2 MPP SC2_CF1.csv	G2	SC2	CF	MPP	ckit+SCA1-	TT22	22	48	329	83588.4	54290.1	5892.41	114.665	961.343	74.968	63.8053	123.59	63.828	89.9062	326.845	57.7794	131548	77532.1	61494.4	7935.89	1915.17	1.65738	-1329.31	28966.4	1413.28	-2.89825	-0.268212	1	1	0	0	0	MEP,
615	export_G2 MPP SC2_CV1.csv.1	G2	SC2	CV	MPP	MPP	TT22	22	48	330	101899	52422.8	8044.17	112.908	629.359	118.77	8108.61	137.209	59.1562	135.287	311.863	35.2957	165541	78985.1	77937.9	3406.16	3099.63	12319.9	-33.5002	9427.01	2260.12	-2.81434	-0.357604	1	2	0	0	0	MPP,MPP,
616	export_G2 MPP SC2_CV1.csv.2	G2	SC2	CV	MPP	MPP	TT22	22	48	330	102199	60803.8	8600.81	91.3285	627.571	267.732	8368.1	17.3547	76.1385	150.757	277.425	63.0233	165541	78985.1	77937.9	3406.16	3099.63	12319.9	-33.5002	9427.01	2260.12	-2.98559	-0.193081	1	2	0	0	0	MPP,MPP,
617	export_G2 MPP SC2_VC1.csv.1	G2	SC2	VC	MPP	MPP	TT22	22	48	331	109086	64954.8	5535.68	-80.6359	733.433	154.648	16572.6	21.158	59.0649	1144.28	355.274	57.7377	167039	93407.9	57093.8	3290.57	2871.05	30723	669.594	19121.8	1643.65	-2.05409	-2.20644	1	2	0	0	0	MPP,MPP,
618	export_G2 MPP SC2_VC1.csv.2	G2	SC2	VC	MPP	MPP	TT22	22	48	331	102499	69339.3	5576.54	36.3668	534.764	218.492	17767.7	44.0476	59.2748	847.016	343.317	140.801	167039	93407.9	57093.8	3290.57	2871.05	30723	669.594	19121.8	1643.65	-2.22457	-2.09204	1	2	0	0	0	MPP,MPP,
619	export_G2 MPP SC2_Vi1.csv	G2	SC2	Vi	MPP	MPP	TT22	22	48	332	111087	78063.9	2.35857	81.6069	1126.23	650.957	16113.9	8.09638	39.9083	269.657	482.566	158.494	156144	77615.4	36.89	1595.06	4030.17	32209.9	1061.18	15835.5	877.72	-3.82843	-0.220083	1	1	0	0	0	MPP,
620	export_G3 ST-HSC SC2_CF1.csv	G3	SC2	CF	ST-HSC	ckit+SCA1-	TT22	22	48	333	129309	112630	6892.57	19.4378	121.212	649.69	63.9739	67.9553	53.5547	53.6725	538.934	202.177	144647	56160.9	77270.3	9374.47	2871.47	-7.98718	408.058	6174.75	57.3557	-2.11998	3.00824	1	1	0	0	0	GMP,
621	export_G3 ST-HSC SC2_VC2.csv	G3	SC2	VC	ST-HSC	ckit+SCA1-	TT22	22	48	334	75214.7	50457.1	2460.89	80.691	116.281	99.0868	7910.69	124.39	22.0887	1.38943	223.415	165.051	133659	79525.3	42605.6	173.152	6508.22	26528	-468.623	5446.06	282.112	0.667565	3.30897	1	1	0	0	0	MEP,
622	export_G3 ST-HSC SC2_Vi2.csv.1	G3	SC2	Vi	ST-HSC	ckit+SCA1-	TT22	22	48	335	136373	91155.7	1.09538	79.8187	66.1851	1178.44	10382.7	131.338	31.9702	-8.34467	212.827	45.0189	160302	84302	-26.18	7051.83	4763.92	47105.8	527.229	876.924	153.327	-3.43213	3.81441	1	4	0	0	0	GMP,GMP,
623	export_G3 ST-HSC SC2_Vi2.csv.2	G3	SC2	Vi	ST-HSC	ckit+SCA1-	TT22	22	48	335	132424	92506.5	1.18018	23.6799	99.1037	1308.87	11701	95.1014	47.3546	-11.97	207.83	80.536	160302	84302	-26.18	7051.83	4763.92	47105.8	527.229	876.924	153.327	-3.54987	3.75407	1	4	0	0	0	GMP,GMP,GMP,
624	export_G3 ST-HSC SC2_Vi2.csv.3	G3	SC2	Vi	ST-HSC	ckit+SCA1-	TT22	22	48	335	128520	72647.8	1.24828	122.339	94.3632	655.301	9941.62	127.431	37.3065	9.23563	366.85	87.3762	160302	84302	-26.18	7051.83	4763.92	47105.8	527.229	876.924	153.327	-2.52474	3.69216	1	4	0	0	0	GMP,GMP,GMP,GMP,
625	export_G3 ST-HSC SC2_Vi2.csv.4	G3	SC2	Vi	ST-HSC	ckit+SCA1-	TT22	22	48	335	131796	75520.7	1.56973	83.2767	108.441	612.107	10476.6	50.3601	34.7754	-3.77012	209.603	173.212	160302	84302	-26.18	7051.83	4763.92	47105.8	527.229	876.924	153.327	-2.60577	3.8412	1	4	0	0	0	GMP,GMP,GMP,GMP,
626	export_G4 ST-HSC SC2_CV2.csv.1	G4	SC2	CV	ST-HSC	HSC_ST	TT22	22	48	336	116447	67917.3	3955.62	43.6639	114.202	75.5118	4196.02	68.2296	66.3125	360.931	363.072	69.1753	173032	130960	64211.2	1185.89	4132.99	13478.2	775.207	24664.4	387.635	-0.154894	-0.0524662	1	3	0	0	0	ST-HSC,ST-HSC,
627	export_G4 ST-HSC SC2_CV2.csv.2	G4	SC2	CV	ST-HSC	HSC_ST	TT22	22	48	336	95290.6	62029.7	3864.12	23.1032	99.4645	101.778	4165.47	48.0233	51.837	183.228	232.857	69.5679	173032	130960	64211.2	1185.89	4132.99	13478.2	775.207	24664.4	387.635	0.296054	0.957949	1	3	0	0	0	ST-HSC,ST-HSC,ST-HSC,
628	export_G4 ST-HSC SC2_CV2.csv.3	G4	SC2	CV	ST-HSC	HSC_ST	TT22	22	48	336	99417.3	69244	3833.07	13.167	104.629	58.3862	4099.36	87.0137	57.4502	310.993	361.386	89.8379	173032	130960	64211.2	1185.89	4132.99	13478.2	775.207	24664.4	387.635	-0.189755	0.0881568	1	3	0	0	0	ST-HSC,ST-HSC,ST-HSC,
629	export_G4 ST-HSC SC2_VC3.csv.1	G4	SC2	VC	ST-HSC	ckit+SCA1-	TT22	22	48	337	152295	65959.7	1649.69	47.7243	122.043	245.731	4999.1	51.785	58.0155	18.1046	311.425	107.941	180204	92095.3	68855.8	1748.3	9500.48	30074.1	-494.542	1225.31	143.123	-0.72454	3.61011	1	2	0	0	0	MEP,MEP,
630	export_G4 ST-HSC SC2_VC3.csv.2	G4	SC2	VC	ST-HSC	ckit+SCA1-	TT22	22	48	337	106986	61082.4	1560.35	78.2444	171.869	147.056	4719.85	10.7281	37.7308	4.25217	347.73	154.331	180204	92095.3	68855.8	1748.3	9500.48	30074.1	-494.542	1225.31	143.123	-0.181003	3.39968	1	2	0	0	0	MEP,MEP,
631	export_G5 HSC SC2_CF2.csv	G5	SC2	CF	HSC	HSC_ST	TT22	22	48	338	125392	65917.4	3629.09	132.273	51.1104	75.4237	32.1069	38.5485	51.3247	293.59	656.378	123.509	141867	72384.1	72869.7	2837.26	2901.09	-35.3071	8423.56	13618	69.5806	0.490457	-0.103404	1	1	0	0	0	ST-HSC,
632	export_G5 HSC SC2_CV1.csv	G5	SC2	CV	HSC	HSC_SLAM	TT22	22	48	339	135511	93490.4	8698.93	803.209	169.642	158.088	7315.99	12.3132	39.6444	3178.61	508.19	39.8322	167689	73915.7	71054.9	800.631	2392.87	9504.35	15367	21358.8	-104.412	0.949724	-5.01844	1	1	0	0	0	SLAM-HSC,
633	export_G6 HSC SC2_CV4.csv	G6	SC2	CV	HSC	ckit-	TT22	22	48	340	71827.5	36656.3	791.904	126896	85949	11762.8	328.465	175704	-10471.5	144779	-4217.13	141.251	140889	65682.1	68807	653.019	6094.29	11853.7	18996.5	2605.9	-87.6734	-1.37364	-5.27507	1	1	0	0	0	MyP,
634	export_G6 HSC SC2_VC2.csv	G6	SC2	VC	HSC	ckit+SCA1-	TT22	22	48	341	128203	103612	3134.36	989.26	100.475	160.147	8020.38	72.3499	71.315	37.0506	204.614	213.693	167727	68797.5	67076.7	729.349	6103.69	26664.9	33235.7	3864.32	-175.964	5.52101	1.11047	1	1	0	0	0	SLAM+MEP,
635	export_G9 ST-HSC SC3_CV1.csv	G9	SC3	CV	ST-HSC	HSC_SLAM	TT22	22	48	342	164476	113043	7684.27	466.405	89.5766	106.545	6814.07	43.4808	45.7017	2692.69	165.358	221.818	144419	105177	82935.9	609.89	5156.38	9291.69	177.564	7801.09	255.672	0.624918	-4.2272	1	1	0	0	0	SLAM-HSC,
636	export_H10 ST-HSC SC3_CV4.csv	H10	SC3	CV	ST-HSC	ckit-	TT22	22	48	343	76716.7	66012.7	731.302	142926	74536.1	8985.74	443.975	169451	-10181	117306	-3189.82	201.128	149905	80285.7	71119.2	4207.94	3520.89	9723.11	2354.07	46904	135.342	-1.37262	-5.26091	1	1	0	0	0	MyP,
637	export_H11 HSC SC3_CV3.csv.1	H11	SC3	CV	HSC	ckit-	TT22	22	48	344	138661	100018	1753.52	366.113	92.7844	649.395	1984.32	65.0357	31.7134	9.40167	91.4155	9.45957	148423	52689.6	51441.3	2204.38	7448.29	11322.5	8233.49	6701.65	-50.0948	3.23424	3.57626	1	3	0	0	0	ckit-,MyP,
638	export_H11 HSC SC3_CV3.csv.2	H11	SC3	CV	HSC	ckit-	TT22	22	48	344	139308	147602	1704.61	214.656	131.561	256.167	1963.43	74.5339	50.9483	7.4994	73.0569	169.217	148423	52689.6	51441.3	2204.38	7448.29	11322.5	8233.49	6701.65	-50.0948	3.60312	3.56916	2	3	0	0	0	MyP,ckit-,MyP,
639	export_H11 HSC SC3_CV3.csv.3	H11	SC3	CV	HSC	ckit-	TT22	22	48	344	130318	76721.6	1851.26	196.679	86.9599	516.151	2161.05	29.2	44.6321	24.5447	93.4706	211.646	148423	52689.6	51441.3	2204.38	7448.29	11322.5	8233.49	6701.65	-50.0948	3.30954	3.63236	3	3	0	0	0	MyP,ckit-,MyP,
640	export_H11 HSC SC3_VC2.csv.1	H11	SC3	VC	HSC	HSC_SLAM	TT22	22	48	345	153908	102242	4012.34	3171.3	36.1569	115.048	11779.3	187.102	29.2782	892.231	375.748	2.33346	195989	67389.7	79878.8	139.741	7609.79	33013.2	22230.3	26367.3	-130.488	3.06287	-2.82104	1	3	0	0	0	SLAM-HSC,SLAM-HSC,
641	export_H11 HSC SC3_VC2.csv.2	H11	SC3	VC	HSC	HSC_SLAM	TT22	22	48	345	147473	114326	3936.3	3133.13	27.2237	93.6392	11556.9	233.171	11.4185	770.136	357.365	3.71204	195989	67389.7	79878.8	139.741	7609.79	33013.2	22230.3	26367.3	-130.488	3.1606	-2.73035	1	3	0	0	0	SLAM-HSC,SLAM-HSC,SLAM-HSC,
642	export_H11 HSC SC3_VC2.csv.3	H11	SC3	VC	HSC	HSC_SLAM	TT22	22	48	345	145953	107069	3816.86	2195.68	36.8421	60.5129	11237.7	-29.4067	19.5172	2215.43	282.647	112.714	195989	67389.7	79878.8	139.741	7609.79	33013.2	22230.3	26367.3	-130.488	1.72767	-5.32488	1	3	0	0	0	SLAM-HSC,SLAM-HSC,SLAM-HSC,
643	export_H11 HSC SC3_Vi2.csv.1	H11	SC3	Vi	HSC	ckit+SCA1-	TT22	22	48	346	99895.6	69252.3	9.37161	396.952	102.422	85.1379	6219.09	291.593	58.9299	14.4485	530.117	4.20488	183386	93273.4	-13.09	2076.09	6170.32	50901.3	7195.62	6739.49	144.423	2.7379	2.36973	1	2	0	0	0	SLAM+MEP,SLAM+MEP,
644	export_H11 HSC SC3_Vi2.csv.2	H11	SC3	Vi	HSC	ckit+SCA1-	TT22	22	48	346	176187	126982	0.295832	807.852	93.0952	119.514	6922.65	93.0453	50.8003	28.1901	329.603	218.213	183386	93273.4	-13.09	2076.09	6170.32	50901.3	7195.62	6739.49	144.423	4.66558	1.05291	1	2	0	0	0	SLAM+MEP,SLAM+MEP,
645	export_H12 HSC SC3_CV3.csv.1	H12	SC3	CV	HSC	ckit+SCA1-	TT22	22	48	347	140430	116567	1505.19	48.7829	93.2046	2666.89	1273.09	15.599	93.3234	44.9228	182.241	3.02698	186477	133880	93455.5	6411.07	7301.86	18196.7	3246.79	52119.8	631.127	-4.71527	3.86261	1	5	0	0	0	MyP,GMP,
646	export_H12 HSC SC3_CV3.csv.2	H12	SC3	CV	HSC	ckit-	TT22	22	48	347	133436	94995.5	1422.91	208.932	89.0712	1590.12	1272.59	98.3219	48.1852	0.162217	119.25	86.4504	186477	133880	93455.5	6411.07	7301.86	18196.7	3246.79	52119.8	631.127	-4.05807	3.73317	2	5	0	0	0	MyP,MyP,GMP,
647	export_H12 HSC SC3_CV3.csv.3	H12	SC3	CV	HSC	ckit-	TT22	22	48	347	112664	82512.8	1595.14	304.927	90.8501	1880.88	1373.52	30.7358	75.3107	13.1768	128.49	120.145	186477	133880	93455.5	6411.07	7301.86	18196.7	3246.79	52119.8	631.127	-4.21081	3.73048	2	5	0	0	0	MyP,MyP,MyP,GMP,
648	export_H12 HSC SC3_CV3.csv.4	H12	SC3	CV	HSC	ckit-	TT22	22	48	347	157972	127261	1468.7	51.451	97.5224	4021	1181.4	68.9171	62.6604	9.04733	128.833	140.542	186477	133880	93455.5	6411.07	7301.86	18196.7	3246.79	52119.8	631.127	-5.18835	4.06887	2	5	0	0	0	MyP,MyP,MyP,MyP,GMP,
649	export_H12 HSC SC3_CV3.csv.5	H12	SC3	CV	HSC	ckit-	TT22	22	48	347	148506	112624	1473.79	261.204	85.1614	3516.42	1262.18	-54.0968	55.5659	41.7128	103.178	142.258	186477	133880	93455.5	6411.07	7301.86	18196.7	3246.79	52119.8	631.127	-4.40367	3.79138	2	5	0	0	0	MyP,MyP,MyP,MyP,GMP,
650	export_H12 HSC SC3_Vi3.csv	H12	SC3	Vi	HSC	ckit+SCA1-	TT22	22	48	348	170000	110369	1.38415	416.636	89.3541	125.644	3734.21	160.427	67.6554	-6.35999	177.104	140.164	203421	109461	-7.14	5871.44	8912.34	65922.6	8638.62	2131.54	72.3279	4.6226	2.32436	1	3	0	0	0	ckit-,SLAM+MEP,
651	export_H12 HSC SC3_Vi4.csv.1	H12	SC3	Vi	HSC	ckit-	TT22	22	48	348	108819	67891.6	3.94957	197.494	71.301	52.7594	1848.17	82.816	67.1297	7.5868	43.8745	54.2324	203421	109461	-7.14	5871.44	8912.34	65922.6	8638.62	2131.54	72.3279	4.05536	3.57242	2	3	0	0	0	ckit-,ckit-,SLAM+MEP,
652	export_H12 HSC SC3_Vi4.csv.2	H12	SC3	Vi	HSC	ckit-	TT22	22	48	348	112194	88423.3	1.4029	263.368	127.908	89.4174	2033.27	67.8464	47.5859	11.5356	54.3327	139.724	203421	109461	-7.14	5871.44	8912.34	65922.6	8638.62	2131.54	72.3279	4.15686	3.473	2	3	0	0	0	ckit-,ckit-,SLAM+MEP,
653	export_H2 MPP SC2_CF1.csv	H2	SC2	CF	MPP	MPP	TT22	22	48	349	122118	105168	9905.92	78.5971	1053.6	142.317	229.879	86.7028	91.3579	111.951	668.813	196.269	186467	117173	109788	5591.24	7058.89	-25.8113	-15.7169	9913.1	3286.59	-2.9084	-0.00442776	1	3	0	0	0	MEP,MPP,
654	export_H2 MPP SC2_CF2.csv.1	H2	SC2	CF	MPP	ckit+SCA1-	TT22	22	48	349	108584	78489.9	5004.43	110.893	1083.16	160.676	117.339	66.7982	66.2522	34.4053	580.227	64.593	186467	117173	109788	5591.24	7058.89	-25.8113	-15.7169	9913.1	3286.59	-2.89238	0.210907	2	3	0	0	0	MEP,MEP,MPP,
655	export_H2 MPP SC2_CF2.csv.2	H2	SC2	CF	MPP	ckit+SCA1-	TT22	22	48	349	92278.4	68055	4938.76	44.3393	723.851	96.5763	128.03	86.6081	60.2254	44.2966	752.223	147.105	186467	117173	109788	5591.24	7058.89	-25.8113	-15.7169	9913.1	3286.59	-2.80753	0.292881	2	3	0	0	0	MEP,MEP,MPP,
656	export_H2 MPP SC2_CV5.csv	H2	SC2	CV	MPP	ckit-	TT22	22	48	350	78153.7	89545.5	416.431	147.839	107.064	142.978	555.503	129.674	37.8502	128.286	79.717	7.11677	177233	89025.1	93807.7	7727.63	3188.97	10656.6	787.232	17432.1	1091.31	1.31427	1.72026	1	1	0	0	0	ckit-,
657	export_H2 MPP SC2_VC2.csv	H2	SC2	VC	MPP	MPP	TT22	22	48	351	116343	90053.5	4843.64	71.1827	691.873	148.207	12916.5	79.1064	39.8758	275.793	252.398	37.0053	150356	57916.1	54621	3373.32	2066.98	22799	1048.2	33616	1120.16	-2.71725	-0.934419	1	1	0	0	0	MPP,
658	export_H3 ST-HSC SC2_CF3.csv.1	H3	SC2	CF	ST-HSC	ckit+SCA1-	TT22	22	48	352	90842.8	49532.7	2382.88	102.339	76.8668	164.661	40.8301	133.728	35.9165	-27.6618	353.248	17.2568	144958	83522.5	73938.3	11385.7	5348.06	-13.3212	-1601.05	3743.12	266.7	0.035503	3.64606	1	2	0	0	0	MEP,MEP,
659	export_H3 ST-HSC SC2_CF3.csv.2	H3	SC2	CF	ST-HSC	ckit+SCA1-	TT22	22	48	352	80204.1	61547.2	2145.17	45.5299	88.5739	88.4495	38.244	121.361	32.4939	15.5266	279.928	29.073	144958	83522.5	73938.3	11385.7	5348.06	-13.3212	-1601.05	3743.12	266.7	0.745602	3.22197	1	2	0	0	0	MEP,MEP,
660	export_H3 ST-HSC SC2_VC2.csv.1	H3	SC2	VC	ST-HSC	ckit+SCA1-	TT22	22	48	353	119564	78393.2	3477.64	50.7657	89.4139	794.819	10034.6	-18.5889	64.2375	41.1157	311.675	13.0573	176062	97130.2	80709.4	8469.45	9810.42	30745.4	714.509	539.779	399.516	-2.94864	3.1209	1	4	0	0	0	GMP,GMP,
661	export_H3 ST-HSC SC2_VC2.csv.2	H3	SC2	VC	ST-HSC	ckit+SCA1-	TT22	22	48	353	137052	80292.6	3635.19	127.127	120.866	1044.21	11045.1	71.2658	67.9063	16.9889	573.809	30.1661	176062	97130.2	80709.4	8469.45	9810.42	30745.4	714.509	539.779	399.516	-3.13382	3.12722	1	4	0	0	0	GMP,GMP,GMP,
662	export_H3 ST-HSC SC2_VC2.csv.3	H3	SC2	VC	ST-HSC	ckit+SCA1-	TT22	22	48	353	115238	71121.9	3575.94	87.8422	95.087	339.017	11061.8	176.423	34.3067	29.8805	587.289	41.7387	176062	97130.2	80709.4	8469.45	9810.42	30745.4	714.509	539.779	399.516	-1.33306	3.41699	1	4	0	0	0	GMP,GMP,GMP,GMP,
663	export_H3 ST-HSC SC2_VC2.csv.4	H3	SC2	VC	ST-HSC	ckit+SCA1-	TT22	22	48	353	117069	67856.1	3193.22	129.887	102.237	427.762	9624.24	32.059	48.3442	25.7999	408.395	79.5325	176062	97130.2	80709.4	8469.45	9810.42	30745.4	714.509	539.779	399.516	-1.45858	3.50728	1	4	0	0	0	GMP,GMP,GMP,GMP,
664	export_H3 ST-HSC SC2_Vi0.csv	H3	SC2	Vi	ST-HSC	MPP	TT22	22	48	354	150114	122056	-0.756171	121.562	794.278	117.907	45809	176.567	86.7833	300.093	437.429	91.4384	139512	58388.5	-27.37	4508.03	2011.27	41252.5	-580.445	18520.9	246.556	-2.54312	-0.945503	1	1	0	0	0	MPP,
665	export_H4 ST-HSC SC2_Vi2.csv.1	H4	SC2	Vi	ST-HSC	ckit+SCA1-	TT22	22	48	355	175428	127852	5.25185	70.8705	117.854	85.4717	11882.9	96.3381	67.6071	-21.424	805.307	62.3645	191371	123992	28.56	6134.74	9720.52	48996.2	-455.331	728.323	451.22	0.713114	3.38948	1	3	0	0	0	MEP,MEP,
666	export_H4 ST-HSC SC2_Vi2.csv.2	H4	SC2	Vi	ST-HSC	ckit+SCA1-	TT22	22	48	355	119179	97775.2	1.39653	83.648	109.959	167.841	11111.6	77.4307	44.0838	-13.9563	460.3	95.399	191371	123992	28.56	6134.74	9720.52	48996.2	-455.331	728.323	451.22	-0.153335	3.69778	1	3	0	0	0	SLAM-HSC,MEP,MEP,
667	export_H4 ST-HSC SC2_Vi6.csv	H4	SC2	Vi	ST-HSC	HSC_SLAM	TT22	22	48	355	75271.8	64339.1	-12.1207	791.158	55.9541	80523.3	833.005	969.25	-413.534	213.542	195.202	183.284	191371	123992	28.56	6134.74	9720.52	48996.2	-455.331	728.323	451.22	-6.50036	3.73074	2	3	0	0	0	SLAM-HSC,MEP,MEP,
668	export_H6 HSC SC2_CF2.csv.1	H6	SC2	CF	HSC	ckit+SCA1-	TT22	22	48	356	128205	70421.2	3213.41	83.2883	69.7799	725.738	53.4362	196.654	49.3109	-18.4754	351.336	147.26	161417	79219.5	73323	5205.61	4319.03	-29.3751	3446.63	2682.3	-33.5856	-2.53489	3.82631	1	3	0	0	0	GMP,GMP,
669	export_H6 HSC SC2_CF2.csv.2	H6	SC2	CF	HSC	ckit+SCA1-	TT22	22	48	356	123754	90144.2	3627.13	156.672	57.8547	462.511	63.5734	177.08	56.6249	-13.3262	503.02	200.118	161417	79219.5	73323	5205.61	4319.03	-29.3751	3446.63	2682.3	-33.5856	-2.10172	3.78512	1	3	0	0	0	GMP,GMP,GMP,
670	export_H6 HSC SC2_CF2.csv.3	H6	SC2	CF	HSC	ckit+SCA1-	TT22	22	48	356	144430	75056.4	3318.93	25.1637	76.4594	519.462	29.5599	100.149	50.9728	21.8625	580.348	206.983	161417	79219.5	73323	5205.61	4319.03	-29.3751	3446.63	2682.3	-33.5856	-1.93591	3.25711	1	3	0	0	0	GMP,GMP,GMP,
671	export_H6 HSC SC2_VC3.csv	H6	SC2	VC	HSC	ckit-	TT22	22	48	357	173066	119117	1658.09	442.008	83.1627	299.882	4827.68	150.387	70.2666	-11.3061	149.661	176.647	162073	59353.6	61621.8	2007.44	4920.32	30347.2	6629.02	601.317	114.099	4.56119	2.0023	1	1	0	0	0	ckit-,
672	export_H9 ST-HSC SC3_CF1.csv.1	H9	SC3	CF	ST-HSC	HSC_SLAM	TT22	22	48	358	134474	108250	6715.05	574.708	185.194	64.7084	100.391	144.001	28.407	2904.48	232.48	140.097	156598	62014.5	53947.5	1450.03	3883.49	-14.0679	2297.8	14725	145.911	0.46875	-4.28199	1	2	0	0	0	SLAM-HSC,SLAM-HSC,
673	export_H9 ST-HSC SC3_CF1.csv.2	H9	SC3	CF	ST-HSC	HSC_SLAM	TT22	22	48	358	144163	111224	6812.1	1981.44	59.9191	167.062	77.559	5.20784	16.8664	3478.75	186.804	199.516	156598	62014.5	53947.5	1450.03	3883.49	-14.0679	2297.8	14725	145.911	1.57397	-5.58473	1	2	0	0	0	SLAM-HSC,SLAM-HSC,
674	export_H9 ST-HSC SC3_CV2.csv.1	H9	SC3	CV	ST-HSC	HSC_SLAM	TT22	22	48	359	134962	91850	4143.16	806.648	79.7173	183.014	4564.55	100.764	33.2612	647.321	210.611	10.5931	160667	87720.9	83303.6	3153.89	3839.84	12122.7	1910.99	51376.9	489.896	1.67762	-3.11368	1	3	0	0	0	SLAM-HSC,SLAM-HSC,
675	export_H9 ST-HSC SC3_CV2.csv.2	H9	SC3	CV	ST-HSC	HSC_SLAM	TT22	22	48	359	144649	92950.2	4084.05	787.495	42.1054	166.528	4364.09	68.7912	32.4174	880.682	295.46	79.428	160667	87720.9	83303.6	3153.89	3839.84	12122.7	1910.99	51376.9	489.896	1.60961	-3.30408	1	3	0	0	0	SLAM-HSC,SLAM-HSC,SLAM-HSC,
676	export_H9 ST-HSC SC3_CV2.csv.3	H9	SC3	CV	ST-HSC	HSC_SLAM	TT22	22	48	359	134379	98671.5	4170.7	938.109	95.2149	178.114	4505.45	15.9073	38.8492	1101.4	222.081	179.747	160667	87720.9	83303.6	3153.89	3839.84	12122.7	1910.99	51376.9	489.896	1.48711	-3.60166	1	3	0	0	0	SLAM-HSC,SLAM-HSC,SLAM-HSC,
677	export_H9 ST-HSC SC3_VC2.csv.1	H9	SC3	VC	ST-HSC	HSC_SLAM	TT22	22	48	360	125916	78510.6	3003.16	755.667	68.8133	107.417	8110.81	79.3772	39.5214	1856.87	190.496	35.7143	179519	83064.4	42890	1320.61	4047.64	22989.2	-40.4249	8589.08	354.969	1.17524	-3.91264	1	3	0	0	0	SLAM-HSC,SLAM-HSC,
678	export_H9 ST-HSC SC3_VC2.csv.2	H9	SC3	VC	ST-HSC	HSC_SLAM	TT22	22	48	360	125376	79193.1	2803.54	1514.73	28.8479	131.04	7411.81	88.248	3.04098	2326.38	165.559	91.6649	179519	83064.4	42890	1320.61	4047.64	22989.2	-40.4249	8589.08	354.969	1.61705	-5.46441	1	3	0	0	0	SLAM-HSC,SLAM-HSC,SLAM-HSC,
679	export_H9 ST-HSC SC3_VC2.csv.3	H9	SC3	VC	ST-HSC	HSC_SLAM	TT22	22	48	360	142731	76337.4	3035.42	857.837	45.4952	72.3999	7965.52	101.067	46.1389	2086.47	295.671	172.489	179519	83064.4	42890	1320.61	4047.64	22989.2	-40.4249	8589.08	354.969	1.20703	-4.1688	1	3	0	0	0	SLAM-HSC,SLAM-HSC,SLAM-HSC,
680	export_A10 ST-HSC SC3_CV0.csv	A10	SC3	CV	ST-HSC	MPP	TT23	23	24	361	138833	95837.7	23769.5	56.2186	617.952	232.497	10402.9	25.0366	1904.77	584.122	337.861	181.115	144063	90869.6	101357	7018.3	3869.51	7802.55	-350.029	7585.99	435.837	-2.46739	-1.99496	1	1	0	0	0	MPP,
681	export_A10 ST-HSC SC3_VC0.csv	A10	SC3	VC	ST-HSC	HSC_SLAM	TT23	23	24	362	100387	74383	9381.63	902.714	173.741	128.102	23591.4	-153.094	-11.9036	6617.5	210.878	125.652	157463	78816.1	39684.1	440.317	4037.63	20241.9	1244.34	27717.9	-17.0275	0.592997	-5.15749	1	1	0	0	0	SLAM-HSC,
682	export_A11 HSC SC3_CF0.csv	A11	SC3	CF	HSC	ckit+SCA1-	TT23	23	24	363	103835	79074	23447.6	2337.26	121.778	-1.95521	51.0904	252.376	53.5593	-20.4524	197.593	142.539	149042	78957.7	114027	-84.5316	3727.81	10.6009	10333.5	573.914	119.458	5.58057	0.389784	1	1	0	0	0	SLAM+MEP,
683	export_A11 HSC SC3_CV1.csv.1	A11	SC3	CV	HSC	ckit+SCA1-	TT23	23	24	364	121770	66643.1	21578.7	508.678	145.387	-32.5387	9519.72	171.665	504.463	84.5512	233.114	96.1791	174059	113791	159967	4670.39	6464.26	14911.5	12490.5	452.971	215.006	3.88161	0.495653	1	2	0	0	0	SLAM+MEP,SLAM+MEP,
684	export_A11 HSC SC3_CV1.csv.2	A11	SC3	CV	HSC	ckit+SCA1-	TT23	23	24	364	120712	74148.9	20664.1	1126.79	199.581	161.292	9211.86	90.5416	496.891	89.8218	406.409	98.1111	174059	113791	159967	4670.39	6464.26	14911.5	12490.5	452.971	215.006	4.08893	-0.526353	1	2	0	0	0	SLAM+MEP,SLAM+MEP,
685	export_A12 HSC SC3_CV0.csv	A12	SC3	CV	HSC	HSC_SLAM	TT23	23	24	365	106794	66707.7	26895.3	831.709	302.025	184.495	12920.6	-65.2747	104.266	4036.4	355.9	68.8418	158597	127501	161072	4154.89	9914.72	15101.1	5048.18	22101.1	616.121	0.0676968	-5.05427	1	1	0	0	0	SLAM-HSC,
686	export_A12 HSC SC3_VC0.csv	A12	SC3	VC	HSC	ckit+SCA1-	TT23	23	24	366	97005	52546	12137.9	519.847	79.5625	81.6395	30771.6	194.991	400.331	161.541	217.409	201.299	142069	63361.6	39580.6	3675.22	5505.55	29241.7	7913.18	1098.21	197.639	3.0304	-0.493002	1	1	0	0	0	SLAM+MEP,
687	export_A2 MPP SC2_CV0.csv	A2	SC2	CV	MPP	MPP	TT23	23	24	367	119479	84324.2	29401.8	71.2568	787.555	355.041	13182.6	167.877	759.693	430.43	734.144	32.8791	160523	106382	111942	4408.21	4259.89	9977.12	468.994	17647	1246.63	-2.97074	-1.55865	1	1	0	0	0	MPP,
688	export_A3 ST-HSC SC2_CF0.csv	A3	SC2	CF	ST-HSC	ckit+SCA1-	TT23	23	24	368	109235	76312	32090.3	168.175	184.322	123.288	55.2652	128.301	952.606	197.893	334.833	155.436	163592	103776	142681	3916.24	4803.46	-22.1585	940.509	6143.57	557.165	0.310726	0.597294	1	1	0	0	0	MEP,
689	export_A3 ST-HSC SC2_VC0.csv	A3	SC2	VC	ST-HSC	MPP	TT23	23	24	369	140786	77248.2	11270.2	114.846	608.204	137.826	28646.9	50.4838	1821.94	409.043	588.417	42.329	163881	90517.4	56986.7	7491.93	5115.49	25613.6	821.492	6851.53	70.2883	-2.335	-0.965997	1	1	0	0	0	MPP,
690	export_A3 ST-HSC SC2_Vi0.csv	A3	SC2	Vi	ST-HSC	HSC_ST	TT23	23	24	370	107319	51666.4	0.953281	-14.6406	424.387	0.955741	29074.5	102.084	485.861	1413.61	351.357	193.041	143140	75135.4	-13.09	2298.5	5257.99	34167.2	694.473	9418.63	184.528	-1.7763	-2.27858	1	1	0	0	0	ST-HSC,
691	export_A4 ST-HSC SC2_CF0.csv	A4	SC2	CF	ST-HSC	HSC_SLAM	TT23	23	24	371	123965	79440.2	37102.4	480.293	204.885	154.271	26.1429	70.8791	757.084	441.85	503.383	154.36	153508	114152	112277	4925.82	5149.92	-29.1002	-37.2657	21742.5	454.383	1.36068	-1.52421	1	1	0	0	0	SLAM-HSC,
692	export_A4 ST-HSC SC2_CV0.csv	A4	SC2	CV	ST-HSC	HSC_ST	TT23	23	24	372	112857	58127.4	23314.3	23.0992	263.869	669.145	10102.2	253.113	1509.47	305.5	603.122	110.884	138703	75513.8	94969.1	6300.2	5955.01	7115.92	-455.104	1176.75	620.252	-3.64353	0.617621	1	1	0	0	0	ST-HSC,
693	export_A5 HSC SC2_CF0.csv	A5	SC2	CF	HSC	HSC_SLAM	TT23	23	24	373	82937.7	42252	23903.9	1033.33	175.989	197.317	15.237	-55.9711	18.7304	2848.79	194.017	99.9782	125984	80590.4	96005.6	378.787	3270.13	-39.5342	16811.6	23625.3	-1.92298	0.546601	-5.01283	1	1	0	0	0	SLAM-HSC,
694	export_A5 HSC SC2_CV0.csv	A5	SC2	CV	HSC	ckit+SCA1-	TT23	23	24	374	104955	77569	24204.5	1463.85	77.6703	84.0197	10965	73.4033	202.739	172.915	221.741	126.944	149111	71699.9	104809	320.094	7792.1	7942.54	12989.1	2924.51	41.6151	3.62485	-1.26815	1	1	0	0	0	SLAM+MEP,
695	export_A5 HSC SC2_VC1.csv	A5	SC2	VC	HSC	ckit+SCA1-	TT23	23	24	375	135652	86623	8509.81	452.409	103.835	365.636	16513.6	118.255	625.734	45.2577	339.637	39.29	196673	132070	51104.6	4353.7	9882.77	27293	12334.7	834.679	31.3564	3.48957	1.24852	1	1	0	0	0	GMP,
696	export_A5 HSC SC2_Vi1.csv.1	A5	SC2	Vi	HSC	HSC_ST	TT23	23	24	376	129796	80491.9	3.34028	51.7634	147.942	868.192	17555.3	-48.3634	1759.6	288.092	793.288	132.466	202585	124211	3.57	59489.6	7123.91	37337.4	8843.97	3415.82	177.463	-3.48101	0.890373	1	2	0	0	0	GMP,ST-HSC,
697	export_A5 HSC SC2_Vi1.csv.2	A5	SC2	Vi	HSC	ckit+SCA1-	TT23	23	24	376	133982	77866.5	2.10136	128.076	244.505	1315.56	16783.8	435.69	2689.96	143.243	822.778	198.049	202585	124211	3.57	59489.6	7123.91	37337.4	8843.97	3415.82	177.463	-3.6207	1.06758	2	2	0	0	0	GMP,ST-HSC,
698	export_A6 HSC SC2_VC0.csv	A6	SC2	VC	HSC	ckit+SCA1-	TT23	23	24	377	131848	88543.3	9154.63	1819.06	46.1892	109.066	21768.4	21.6103	483.76	84.0705	335.712	95.8906	149774	88539.6	43076.8	622.485	5467.97	18631.6	9846.77	3505.35	-124.355	5.10225	-0.0859451	1	1	0	0	0	SLAM+MEP,
699	export_A7 MPP SC3_VC0.csv	A7	SC3	VC	MPP	MPP	TT23	23	24	378	111761	71977.5	9589.25	50.5684	2295.21	426.554	26973.6	-120.928	1022.29	4172.49	241.352	162.763	135619	89756.9	37926.5	2442.73	3212.09	22364.1	-550.581	26319.2	2163.01	-1.94151	-2.56037	1	1	0	0	0	MPP,
700	export_A8 MPP SC3_CF1.csv.1	A8	SC3	CF	MPP	ckit+SCA1-	TT23	23	24	379	121628	89154.8	15393.4	31.6467	707.903	908.356	84.0343	59.2742	2383.56	161.062	414.523	111.989	170067	107252	135320	6543.94	5029.1	34.5793	1893.12	2317.73	2020.56	-3.76426	0.213682	1	2	0	0	0	MPP,GMP,
701	export_A8 MPP SC3_CF1.csv.2	A8	SC3	CF	MPP	MPP	TT23	23	24	379	114139	78406.8	15120	77.3902	581.064	634.091	65.6172	42.5351	2820.34	234.669	492.644	207.808	170067	107252	135320	6543.94	5029.1	34.5793	1893.12	2317.73	2020.56	-3.79076	0.0784339	2	2	0	0	0	MPP,GMP,
702	export_A8 MPP SC3_CV1.csv.1	A8	SC3	CV	MPP	HSC_ST	TT23	23	24	380	105118	50937.6	21439	195.122	215.849	108.204	9450.98	-37.2949	1685.61	422.661	290.378	119.563	151015	119734	162193	6075.16	8877.66	13741.3	996.199	10457.1	774.604	0.27597	-1.02946	1	2	0	0	0	ST-HSC,ST-HSC,
703	export_A8 MPP SC3_CV1.csv.2	A8	SC3	CV	MPP	HSC_ST	TT23	23	24	380	102761	64875.8	20388.2	197.256	231.633	178.482	8354.7	85.1762	2111.36	289.237	379.496	189.477	151015	119734	162193	6075.16	8877.66	13741.3	996.199	10457.1	774.604	-1.13733	-0.409513	1	2	0	0	0	ST-HSC,ST-HSC,
704	export_A9 ST-HSC SC3_VC0.csv	A9	SC3	VC	ST-HSC	HSC_ST	TT23	23	24	381	142636	88524.6	8957.7	292.274	126.219	51.4981	25687.8	176.794	3092.85	312.858	402.547	87.5932	161643	105930	33168.9	5104.21	6396	24211.6	1766.09	8451.45	247.025	0.835475	-0.660086	1	1	0	0	0	ST-HSC,
705	export_B10 ST-HSC SC3_CF0.csv	B10	SC3	CF	ST-HSC	HSC_ST	TT23	23	24	382	86525.1	59546.1	26675.4	225.663	340.088	188.735	24.0058	-20.409	491.449	1217.85	212.897	134.328	145173	87098.5	137215	3845.33	3271.46	-38.7398	1472.41	11245.1	386.365	-1.54814	-3.4715	1	1	0	0	0	ST-HSC,
706	export_B10 ST-HSC SC3_CV0.csv	B10	SC3	CV	ST-HSC	HSC_ST	TT23	23	24	383	150724	109127	29430.7	278.772	335.933	85.3169	12526.7	55.0517	2175.79	2777.19	192.03	83.0388	162145	89773.6	129973	4344.38	7007.13	7893.62	1113.77	5273.05	295.887	0.163402	-3.98845	1	1	0	0	0	ST-HSC,
707	export_B10 ST-HSC SC3_VC0.csv	B10	SC3	VC	ST-HSC	HSC_ST	TT23	23	24	384	104246	53051	10175.2	100.707	346.963	213.964	22544.9	44.3412	451.216	911.941	322.519	78.3387	140914	69801.8	42312.8	664.995	5704.33	19194.5	548.218	4079.59	472.892	-1.38375	-2.31783	1	1	0	0	0	ST-HSC,
708	export_B11 HSC SC3_CF1.csv.1	B11	SC3	CF	HSC	ckit+SCA1-	TT23	23	24	385	128882	63652.8	18504.5	715.121	151.248	43.372	28.3923	71.7857	656.727	127.817	301.666	64.3416	154486	89020.3	139562	7563.81	3685.5	-17.1843	7518.5	645.962	46.3498	3.69673	0.166841	1	2	0	0	0	SLAM+MEP,SLAM+MEP,
709	export_B11 HSC SC3_CF1.csv.2	B11	SC3	CF	HSC	ckit+SCA1-	TT23	23	24	385	135399	71599.6	17873.1	665.149	52.8222	73.3513	42.0062	122.563	875.445	174.169	274.062	192.667	154486	89020.3	139562	7563.81	3685.5	-17.1843	7518.5	645.962	46.3498	3.21457	-0.594265	1	2	0	0	0	SLAM+MEP,SLAM+MEP,
710	export_B11 HSC SC3_CV0.csv	B11	SC3	CV	HSC	HSC_SLAM	TT23	23	24	386	141822	98546.8	39448.4	1480.49	89.7794	-26.7569	19860.6	77.6279	803.287	316.193	273.049	159.595	139277	102164	105860	6111.59	8122.29	11979.1	11290.1	4359.34	352.649	3.45134	-1.52815	1	1	0	0	0	SLAM-HSC,
711	export_B11 HSC SC3_VC0.csv	B11	SC3	VC	HSC	ckit+SCA1-	TT23	23	24	387	142436	126351	10618.7	4110.71	29.7896	149.19	22185.5	113.681	158.667	-13.554	392.151	55.8343	198427	127631	42884	3089.13	5121.37	24226.5	26108.1	1594.07	-8.0804	5.28792	0.185981	1	1	0	0	0	SLAM+MEP,
712	export_B12 HSC SC3_CF1.csv.1	B12	SC3	CF	HSC	ckit+SCA1-	TT23	23	24	388	99435.2	75947.7	19255.3	1117.08	85.2081	96.5569	43.3637	40.8844	131.546	6.28033	323.758	26.328	141248	87262.7	138602	-36.0688	5894.23	-35.5186	18905.5	874.059	174.933	5.17652	0.666492	1	2	0	0	0	SLAM+MEP,SLAM+MEP,
713	export_B12 HSC SC3_CF1.csv.2	B12	SC3	CF	HSC	ckit+SCA1-	TT23	23	24	388	109903	71619.2	19729.4	887.255	87.0074	75.2062	57.914	122.678	82.2629	0.167951	183.684	36.2622	141248	87262.7	138602	-36.0688	5894.23	-35.5186	18905.5	874.059	174.933	5.3476	1.40041	1	2	0	0	0	SLAM+MEP,SLAM+MEP,
714	export_B12 HSC SC3_Vi0.csv	B12	SC3	Vi	HSC	ckit-	TT23	23	24	389	112719	69741.8	0.410946	4019.62	68.0761	35.9602	24499.5	34.7324	41.9279	1760.69	145.975	119.408	159970	94593.1	-4.76	-300.769	6327.02	27247.6	28502.7	15257.3	-178.904	2.85035	-3.30811	1	1	0	0	0	SLAM-HSC,
715	export_B2 MPP SC2_CV0.csv	B2	SC2	CV	MPP	MPP	TT23	23	24	390	124699	70730.4	32742	170.731	1498.39	288.127	13117.1	103.076	1484.65	862.496	787.907	92.9947	144589	100096	157948	6473.02	3637.96	10343.2	2927.9	34088.8	2220.4	-2.85609	-2.55485	1	1	0	0	0	MPP,
716	export_B3 ST-HSC SC2_CF0.csv	B3	SC2	CF	ST-HSC	HSC_SLAM	TT23	23	24	391	103845	69039.3	23900.2	410.479	208.885	176.633	51.2716	42.4502	830.244	322.031	231.068	58.2669	155270	82776.4	101584	2697.34	4499.27	-34.3626	1382.65	9208.75	611.321	2.21501	-1.09126	1	1	0	0	0	SLAM-HSC,
717	export_B3 ST-HSC SC2_CV1.csv	B3	SC2	CV	ST-HSC	ckit+SCA1-	TT23	23	24	392	119210	52141.9	17792.6	57.7739	91.6202	155.604	7153.23	103.438	451.966	65.2745	616.736	81.2172	180596	159490	178611	4199.93	7261.27	13932.1	-363.082	5301.66	211.889	0.210717	3.07906	1	1	0	0	0	MEP,
718	export_B3 ST-HSC SC2_VC2.csv	B3	SC2	VC	ST-HSC	ckit+SCA1-	TT23	23	24	393	113991	47765.7	4595.71	67.8266	134.388	159.82	9636.56	95.6582	824.298	135.878	397.124	109.806	155410	91865.6	43079.2	5564.61	6361.3	18988.2	-575.41	1091.13	-54.9414	0.325682	1.47778	1	1	0	0	0	MEP,
719	export_B4 ST-HSC SC2_CV0.csv	B4	SC2	CV	ST-HSC	HSC_ST	TT23	23	24	394	143733	111772	29606.9	102.603	106.936	2581.47	13360	-48.2444	1298	344.7	1036.63	74.4373	181118	104348	95804.5	7057.26	7911.81	9810.72	1454.9	695.323	333.686	-3.64778	1.02954	1	1	0	0	0	ST-HSC,
720	export_B4 ST-HSC SC2_Vi1.csv.1	B4	SC2	Vi	ST-HSC	ckit+SCA1-	TT23	23	24	395	126876	64902.9	1.58029	50.5484	131.465	1623.37	15009.7	348.722	1268.37	31.1485	572.694	162.911	206811	94444.4	-5.95	6545.19	6644.32	30004.1	-980.434	890.1	476.888	-3.46233	3.13706	1	2	0	0	0	GMP,GMP,
721	export_B4 ST-HSC SC2_Vi1.csv.2	B4	SC2	Vi	ST-HSC	ckit+SCA1-	TT23	23	24	395	121525	70946.3	1.5153	52.7514	80.2884	1293.1	13496.5	81.0643	945.337	9.61404	501.953	202.03	206811	94444.4	-5.95	6545.19	6644.32	30004.1	-980.434	890.1	476.888	-3.21732	3.18564	1	2	0	0	0	GMP,GMP,
722	export_B5 HSC SC2_VC1.csv	B5	SC2	VC	HSC	HSC_SLAM	TT23	23	24	396	116626	59185.8	5235.69	999.412	89.9235	87.979	14960.8	23.1538	865.225	246.077	240.606	141.281	147561	77028.7	34614.7	8218.73	5693.12	24465.9	11548.5	2518.49	15.7731	3.39747	-1.29733	1	1	0	0	0	SLAM-HSC,
723	export_B5 HSC SC2_Vi1.csv	B5	SC2	Vi	HSC	ckit-	TT23	23	24	397	93339.6	86031.2	3.85471	1938.06	85.4756	71.5149	11280.4	54.2146	401.309	482.943	42.0743	169.096	197980	99939.8	-35.7	3618.05	6526.74	36720.1	17925.1	833.932	6.80779	3.17399	-1.96045	1	1	0	0	0	ckit-,
724	export_B6 HSC SC2_CF0.csv	B6	SC2	CF	HSC	HSC_SLAM	TT23	23	24	398	108528	62061.6	23940.3	547.432	376.346	73.4078	46.2775	39.416	137.809	1241.13	288.952	34.7063	156723	94806.1	105965	856.639	3446.74	-23.0461	5872.54	22215.6	-9.26572	0.924562	-3.49093	1	1	0	0	0	SLAM-HSC,
725	export_B6 HSC SC2_Vi0.csv	B6	SC2	Vi	HSC	HSC_SLAM	TT23	23	24	399	104330	59174.8	0.246271	1119.14	147.253	10.923	21965.1	-20.4095	-9.39844	5099.49	337.226	49.6816	140013	79960.9	-4.76	569.558	4087.73	24808.6	9827.52	15232.5	-26.5748	0.994132	-5.0132	1	1	0	0	0	SLAM-HSC,
726	export_B7 MPP SC3_CF0.csv	B7	SC3	CF	MPP	ckit+SCA1-	TT23	23	24	400	99660.7	70541.1	27471.2	41.363	749.313	1136.97	33.5877	58.1051	692.682	178.841	411.107	68.7656	137766	84555.5	117238	3549.5	3376.84	-43.6882	338.416	29638	1954.8	-3.80296	0.132282	1	1	0	0	0	GMP,
727	export_B7 MPP SC3_CV0.csv	B7	SC3	CV	MPP	MPP	TT23	23	24	401	156527	106849	23577.5	185.513	655.237	2289.03	10745.9	65.3183	2325.69	339.507	393.279	166.143	145073	67423	94355.1	4057.2	4200.12	8284.84	7.52772	1438.98	1271.79	-4.10538	0.267424	1	1	0	0	0	MPP,
728	export_B7 MPP SC3_VC0.csv	B7	SC3	VC	MPP	ckit-	TT23	23	24	402	93282.1	75604.5	8394.34	120.029	695.549	89.1559	21398.9	1.77001	1033.88	1820.02	141.289	182.676	131067	78437.7	41031.2	1352.41	4935.67	20025.4	-139.988	7379.6	779.145	-2.10373	-2.58415	1	1	0	0	0	MPP,
729	export_B7 MPP SC3_Vi1.csv.1	B7	SC3	Vi	MPP	MPP	TT23	23	24	403	133957	71809.9	11.431	-3.10389	1822.65	1246.89	14857.7	234.255	1885.76	508.959	303.689	55.1888	199765	113145	-36.89	9567.62	4470.26	35507.2	265.049	4721.56	2615.9	-3.80468	-0.469104	1	2	0	0	0	MPP,MPP,
730	export_B7 MPP SC3_Vi1.csv.2	B7	SC3	Vi	MPP	MPP	TT23	23	24	403	108512	80859.6	4.4177	120.251	1876.93	1550.14	16806	11.0008	1926.53	306.085	365.613	99.741	199765	113145	-36.89	9567.62	4470.26	35507.2	265.049	4721.56	2615.9	-3.89772	-0.312265	1	2	0	0	0	MPP,MPP,
731	export_B8 MPP SC3_Vi1.csv.1	B8	SC3	Vi	MPP	MPP	TT23	23	24	404	119357	95368.3	1.40641	62.1031	684.771	1158.48	15522.5	462.612	2205.1	295.919	278.221	52.1047	184721	113190	-15.47	8761.4	4330.69	33798.1	-1279.36	1377.26	1080.48	-3.80151	-0.0803976	1	2	0	0	0	ST-HSC,MPP,
732	export_B8 MPP SC3_Vi1.csv.2	B8	SC3	Vi	MPP	HSC_ST	TT23	23	24	404	127953	105908	1.50802	97.8095	265.833	409.917	16523.5	102.938	2877.46	468.589	322.434	97.1587	184721	113190	-15.47	8761.4	4330.69	33798.1	-1279.36	1377.26	1080.48	-1.30524	-0.774837	2	2	0	0	0	ST-HSC,MPP,
733	export_B9 ST-HSC SC3_CF0.csv	B9	SC3	CF	ST-HSC	HSC_SLAM	TT23	23	24	405	138127	120254	31482.6	733.578	443.225	172.177	54.2629	-94.3	680.793	3560.89	345.687	74.6054	161479	98890.2	132030	2302.93	6630.17	43.6252	-928.319	33521	295.61	-0.20577	-4.93891	1	1	0	0	0	SLAM-HSC,
734	export_B9 ST-HSC SC3_CV1.csv	B9	SC3	CV	ST-HSC	HSC_ST	TT23	23	24	406	100540	48443	20557.3	99.2525	379.036	119.69	9472.3	-62.7897	42.5753	3556.18	195.902	197.034	142308	83710.6	91753.8	1393.83	5055.71	8815.69	2264.89	17217	602.004	-0.974352	-3.15748	1	1	0	0	0	ST-HSC,
735	export_B9 ST-HSC SC3_Vi1.csv.1	B9	SC3	Vi	ST-HSC	ckit+SCA1-	TT23	23	24	407	102139	63662.8	1.78902	14.1703	262.019	2715.63	15683	-10.6643	2525.4	129.439	415.759	103.017	156060	91208.7	-13.09	2415.24	10388.3	32401.1	1584.08	3467.51	418.459	-4.54925	3.15471	1	2	0	0	0	GMP,GMP,
736	export_B9 ST-HSC SC3_Vi1.csv.2	B9	SC3	Vi	ST-HSC	ckit+SCA1-	TT23	23	24	407	131443	90054.5	13.6604	67.399	265.518	2745.21	17274.6	-100.426	3117.02	87.235	492.298	130.129	156060	91208.7	-13.09	2415.24	10388.3	32401.1	1584.08	3467.51	418.459	-4.45539	3.15149	1	2	0	0	0	GMP,GMP,
737	export_C10 ST-HSC SC3_CF0.csv	C10	SC3	CF	ST-HSC	HSC_ST	TT23	23	24	408	129056	109527	24894.7	179.06	364.836	98.0984	52.7559	179.821	2221.18	457.344	197.644	150.868	126964	82858.5	107933	3807.86	5612.04	-39.5048	438.932	9393.22	301.177	-0.00258087	-1.19525	1	1	0	0	0	ST-HSC,
738	export_C10 ST-HSC SC3_CV0.csv	C10	SC3	CV	ST-HSC	ckit+SCA1-	TT23	23	24	409	114303	91441.8	22155.1	498.71	103.676	240.227	9379.35	150.291	5085.48	38.3573	501.611	93.7803	137332	101407	108545	5573.17	5371.78	7963.23	545.1	5044.17	151.073	3.74533	1.2391	1	1	0	0	0	SLAM+MEP,
739	export_C10 ST-HSC SC3_VC1.csv	C10	SC3	VC	ST-HSC	HSC_ST	TT23	23	24	410	145449	116651	6353.9	60.9303	244.803	111.833	15721.7	113.37	2267.55	312.981	485.157	92.0175	165703	106346	46540.9	9107.82	5384.52	25855.4	-1463.86	3183.11	223.691	-0.862554	-0.151237	1	1	0	0	0	ST-HSC,
740	export_C11 HSC SC3_CF0.csv	C11	SC3	CF	HSC	ckit+SCA1-	TT23	23	24	411	134581	90793.6	36192.4	2905.97	133.901	4.14508	64.2104	199.497	693.884	18.4409	306.969	205.921	153706	89494	115179	4450.66	9117.65	-40.4088	22410.2	1299.88	140.334	5.47181	0.22206	1	1	0	0	0	SLAM+MEP,
741	export_C11 HSC SC3_VC2.csv.1	C11	SC3	VC	HSC	ckit+SCA1-	TT23	23	24	412	99386.3	40806.4	3911.15	649.2	57.2984	74.3922	9420.09	140.641	119.073	27.7071	160.677	78.192	145687	65470.2	29318	1211.93	3800.7	18805.6	9058.11	809.132	91.7438	5.12371	1.95739	1	2	0	0	0	ckit-,SLAM+MEP,
742	export_C11 HSC SC3_VC2.csv.2	C11	SC3	VC	HSC	ckit-	TT23	23	24	412	112301	52697.5	3794.57	543.532	62.7716	80.4276	9161.91	87.8922	72.6834	16.5048	107.209	185.431	145687	65470.2	29318	1211.93	3800.7	18805.6	9058.11	809.132	91.7438	5.04171	2.34898	2	2	0	0	0	ckit-,SLAM+MEP,
743	export_C11 HSC SC3_Vi1.csv.1	C11	SC3	Vi	HSC	ckit+SCA1-	TT23	23	24	413	140886	71930.9	1.60813	950.55	127.892	493.959	16922	27.1159	612.548	112.468	242.387	4.48364	166072	89272.6	-2.38	6271	5954.95	33533.3	22845.6	477.324	-24.8718	4.14468	-0.21597	1	2	0	0	0	SLAM+MEP,GMP,
744	export_C11 HSC SC3_Vi1.csv.2	C11	SC3	Vi	HSC	ckit+SCA1-	TT23	23	24	413	129370	73185	0.88348	763.583	89.5445	310.822	16037.2	117.099	673.374	95.4697	257.128	33.6034	166072	89272.6	-2.38	6271	5954.95	33533.3	22845.6	477.324	-24.8718	4.03471	-0.0611801	2	2	0	0	0	SLAM+MEP,GMP,
745	export_C12 HSC SC3_Vi1.csv	C12	SC3	Vi	HSC	ckit+SCA1-	TT23	23	24	414	99348.1	76173.7	1.89109	441.671	92.3047	254.942	13096.8	129.688	1034.26	53.2502	304.745	85.758	181922	81252	8.33	1676.36	7005.06	29561.3	13387.8	500.561	-112.556	3.52912	1.19471	1	1	0	0	0	SLAM+MEP,
746	export_C2 MPP SC2_CF0.csv	C2	SC2	CF	MPP	MPP	TT23	23	24	415	92264.6	56471.6	24819.9	-40.9421	818.405	177.583	47.1663	42.1329	790.227	358.288	372.968	77.6798	139646	70532.5	111528	3769.15	5599.73	26.9947	1306.92	7591.67	785.98	-2.66762	-1.6382	1	1	0	0	0	MPP,
747	export_C2 MPP SC2_CV0.csv	C2	SC2	CV	MPP	MPP	TT23	23	24	416	137047	104007	34246.3	29.059	1142.69	173.341	14176.4	108.58	1288.89	440.726	622.316	137.908	156968	100472	136159	6443.56	3726.87	9950.05	1983.43	9914.6	1401.5	-2.91928	-1.47102	1	1	0	0	0	MPP,
748	export_C2 MPP SC2_VC1.csv	C2	SC2	VC	MPP	MPP	TT23	23	24	417	88312.5	39150.7	7277.6	-29.6364	1048.29	206.767	15209.8	64.2186	658.839	512.767	329.352	170.242	150859	77084.6	40927.7	5920.72	3911.09	20368.2	1962.82	6261.94	2022.14	-2.57885	-1.77087	1	1	0	0	0	MPP,
749	export_C2 MPP SC2_Vi1.csv	C2	SC2	Vi	MPP	ckit+SCA1-	TT23	23	24	418	117350	55673	1.67223	46.713	447.808	575.505	15370.8	92.5225	1033.53	62.1515	498.81	87.823	200450	128547	3.57	7763.31	5924.56	35169.2	801.839	707.036	1565.97	-3.30967	1.07879	1	1	0	0	0	GMP,
750	export_C3 ST-HSC SC2_CV1.csv	C3	SC2	CV	ST-HSC	ckit+SCA1-	TT23	23	24	419	101124	57739.6	11461.4	44.0386	103.727	140.634	5714.46	55.4782	1232.64	66.5111	310.143	37.9984	153076	85976.3	101471	5787.36	3789.61	8689.82	12.8757	2167.65	108.393	0.602073	2.08892	1	1	0	0	0	MEP,
751	export_C3 ST-HSC SC2_VC0.csv	C3	SC2	VC	ST-HSC	ckit-	TT23	23	24	420	89504.2	78599.4	9379.46	656.877	117.326	206.561	25563.3	16.6796	254.621	121.855	136.885	13.8184	148858	88476.5	37245.8	488.608	7361.75	23539.2	1010.72	4103.88	158.684	3.61801	0.256375	1	1	0	0	0	ckit-,
752	export_C3 ST-HSC SC2_Vi2.csv	C3	SC2	Vi	ST-HSC	ckit+SCA1-	TT23	23	24	421	102534	52717.5	4.70919	-11.448	219.718	671.221	9486.43	142.363	731.415	110.844	739.448	145.846	152896	85118.3	35.7	5298.42	8202.17	25383.3	608.943	1016.24	530.651	-2.22354	2.62924	1	1	0	0	0	GMP,
753	export_C5 HSC SC2_CF1.csv.1	C5	SC2	CF	HSC	ckit+SCA1-	TT23	23	24	422	101714	48982.6	18790.7	632.831	43.9701	119.359	23.6004	175.878	935.996	79.5295	226.288	136.349	146981	135295	124669	5742.25	7654.04	-34.7193	9058.26	467.334	408.341	3.67659	0.192397	1	2	0	0	0	SLAM+MEP,SLAM+MEP,
754	export_C5 HSC SC2_CF1.csv.2	C5	SC2	CF	HSC	ckit+SCA1-	TT23	23	24	422	117069	56684.9	20742.1	1556.49	112.389	170.68	30.2911	0.091237	488.524	48.6809	252.412	151.614	146981	135295	124669	5742.25	7654.04	-34.7193	9058.26	467.334	408.341	5.31179	0.172925	1	2	0	0	0	SLAM+MEP,SLAM+MEP,
755	export_C5 HSC SC2_VC1.csv.1	C5	SC2	VC	HSC	HSC_SLAM	TT23	23	24	423	111065	59347.4	6511.34	642.087	141.759	157.566	16710.2	12.516	587.042	262.351	376.888	33.3702	203217	246043	59868.9	8355.05	8142.68	29906.8	10796.1	5282.82	149.543	2.56913	-1.12023	1	2	0	0	0	SLAM+MEP,SLAM-HSC,
756	export_C5 HSC SC2_VC1.csv.2	C5	SC2	VC	HSC	ckit+SCA1-	TT23	23	24	423	95418.2	54892.1	5568.38	478.292	95.197	108.715	13656.1	92.4398	454.715	198.107	365.443	141.772	203217	246043	59868.9	8355.05	8142.68	29906.8	10796.1	5282.82	149.543	2.47145	-0.55929	2	2	0	0	0	SLAM+MEP,SLAM-HSC,
757	export_C5 HSC SC2_Vi0.csv	C5	SC2	Vi	HSC	HSC_SLAM	TT23	23	24	424	131889	69389.5	1.40934	706.231	280.944	186.424	24298.3	-60.9834	83.6571	2009.98	322.185	32.0819	163614	85339.7	-21.42	395.974	4994.92	27643.6	9660.22	25736.5	412.614	0.153917	-4.65429	1	1	0	0	0	SLAM-HSC,
758	export_C6 HSC SC2_CV0.csv	C6	SC2	CV	HSC	HSC_SLAM	TT23	23	24	425	133753	91639.1	38747.8	649.474	180.486	149.142	13567	25.589	541.206	303.408	422.518	155.824	149715	82290.9	136664	1727.48	6444.3	7288.03	3552.5	8565.08	157.782	2.48092	-1.17825	1	1	0	0	0	SLAM-HSC,
759	export_C6 HSC SC2_VC0.csv	C6	SC2	VC	HSC	ckit+SCA1-	TT23	23	24	426	127220	91942	10781.2	730.228	54.2393	95.4912	27519.7	129.487	516.871	71.9159	378.933	144.291	166625	107545	51763.8	4042.32	7013.88	27808	9660.72	2143.42	-35.1498	4.44462	0.527212	1	1	0	0	0	SLAM+MEP,
760	export_C6 HSC SC2_Vi1.csv	C6	SC2	Vi	HSC	ckit+SCA1-	TT23	23	24	427	122355	49675.9	1.29654	211.861	91.8677	54.2578	13735	45.657	633.799	37.8244	212.854	74.9887	169210	86107.2	70.21	7231.12	6196.63	37307.4	6684.02	1012.83	17.8941	2.77235	3.19077	1	1	0	0	0	MEP,
761	export_C7 MPP SC3_CF0.csv	C7	SC3	CF	MPP	MPP	TT23	23	24	428	147423	103237	30831	192.191	1840.08	470.227	88.3339	187.311	1744.74	486.409	409.425	34.015	158693	92364.2	123464	3263.33	3543.67	6.01469	-145.485	21263.6	2321.82	-3.03375	-2.6376	1	1	0	0	0	MPP,
762	export_C7 MPP SC3_CV1.csv	C7	SC3	CV	MPP	MPP	TT23	23	24	429	134360	78438.7	19670.6	244.801	1751.32	1231.39	8274.24	286.664	2578.29	1137.67	474.358	80.8122	163311	139562	175649	8900.89	4835.84	11677.4	-78.3153	48477.5	5292.94	-2.6191	-3.88287	1	1	0	0	0	MPP,
763	export_C7 MPP SC3_VC0.csv	C7	SC3	VC	MPP	HSC_ST	TT23	23	24	430	110388	67256	8464.23	16.1487	432.162	685.883	19972.3	85.3685	3195.41	291.657	320.008	104.672	250412	168009	43831.3	8632.1	3249.92	29694.4	1022.71	4078.87	1016.16	-3.73234	0.35379	1	1	0	0	0	ST-HSC,
764	export_C8 MPP SC3_CV1.csv.1	C8	SC3	CV	MPP	HSC_SLAM	TT23	23	24	431	120730	70519	15374	519.972	296.467	225.169	6881.38	64.104	3426.21	502.425	256.545	4.01147	170211	99589.9	129219	8442.55	5463.58	10247.5	1005.73	25354.7	901.593	1.14228	-1.75744	1	2	0	0	0	SLAM-HSC,SLAM-HSC,
765	export_C8 MPP SC3_CV1.csv.2	C8	SC3	CV	MPP	HSC_SLAM	TT23	23	24	431	119687	62034.1	13667.6	514.803	253.794	170.389	5690.29	150.723	3570.23	631.869	340.555	216.751	170211	99589.9	129219	8442.55	5463.58	10247.5	1005.73	25354.7	901.593	1.18112	-1.76093	1	2	0	0	0	SLAM-HSC,SLAM-HSC,
766	export_C8 MPP SC3_VC1.csv	C8	SC3	VC	MPP	MPP	TT23	23	24	432	99572.7	59794	8184.65	151.382	1099.97	132.181	17928.5	96.5291	2293.98	1330.48	255.487	117.821	157905	85943	43474.3	4157.23	2151.59	22491.1	266.19	11809	3176.63	-2.3437	-2.58962	1	1	0	0	0	MPP,
767	export_C9 ST-HSC SC3_VC1.csv.1	C9	SC3	VC	ST-HSC	ckit+SCA1-	TT23	23	24	433	158645	116037	5441.4	-52.2787	158.441	3049.82	12596.9	15.9822	1518.63	148.169	625.575	22.718	190510	112595	59563.1	7613.64	8026.51	25219	-543.295	485.152	132.424	-4.52653	3.1603	1	2	0	0	0	GMP,GMP,
768	export_C9 ST-HSC SC3_VC1.csv.2	C9	SC3	VC	ST-HSC	ckit+SCA1-	TT23	23	24	433	150616	90461.7	4933.6	85.3242	197.673	1380.52	10477.7	284.66	1420.69	67.7943	534.669	121.364	190510	112595	59563.1	7613.64	8026.51	25219	-543.295	485.152	132.424	-3.42023	2.9291	1	2	0	0	0	GMP,GMP,
769	export_C9 ST-HSC SC3_Vi1.csv	C9	SC3	Vi	ST-HSC	HSC_ST	TT23	23	24	434	106794	71127.4	0.971509	102.242	177.841	220.103	15035.5	120.015	2215.09	579.855	234.239	152.155	176813	97668.1	0	4618.13	6588.04	32665.9	1380.08	6048.34	134.631	-0.619661	-1.11235	1	1	0	0	0	ST-HSC,
770	export_D10 ST-HSC SC3_CV1.csv.1	D10	SC3	CV	ST-HSC	ckit+SCA1-	TT23	23	24	435	88508.4	63692.5	13663.6	91.9371	116.742	329.221	4974.86	194.228	1516.95	78.8633	342.355	21.1868	169648	117755	116189	7074.23	5212.29	11992.7	2040.31	3824.93	134.912	-1.26833	2.52062	1	2	0	0	0	MEP,MEP,
771	export_D10 ST-HSC SC3_CV1.csv.2	D10	SC3	CV	ST-HSC	ckit+SCA1-	TT23	23	24	435	114994	49194.8	12826.4	87.0317	94.3696	299.749	4758.62	134.557	1706.02	93.2129	278.773	36.6783	169648	117755	116189	7074.23	5212.29	11992.7	2040.31	3824.93	134.912	-1.18512	2.49899	1	2	0	0	0	MEP,MEP,
772	export_D10 ST-HSC SC3_Vi0.csv	D10	SC3	Vi	ST-HSC	ckit+SCA1-	TT23	23	24	436	120431	91097.6	0.38663	178.38	143.554	638.895	21927	133.681	2235.22	69.8593	222.755	124.749	149205	74501.1	35.7	2515.01	5320.72	26295.9	1278.11	4135.97	91.4614	-2.74551	2.79563	1	1	0	0	0	GMP,
773	export_D11 HSC SC3_CF1.csv	D11	SC3	CF	HSC	HSC_SLAM	TT23	23	24	437	105264	60828.8	19354.2	1430.75	67.4698	25.7315	22.2364	57.9333	14.2718	375.13	263.845	197.904	141551	57978	72963.7	182.108	7169.42	-54.3274	13220.5	8059.32	-6.78188	3.40895	-1.5953	1	1	0	0	0	SLAM-HSC,
774	export_D11 HSC SC3_CV0.csv	D11	SC3	CV	HSC	ckit+SCA1-	TT23	23	24	438	101040	53704.2	27537.5	1545.41	85.7133	98.0796	11240.7	43.1457	246.212	29.0884	322.123	131.096	133428	65885.5	113204	-169.293	7077.31	8028.13	14093	3828.44	2.66024	5.21334	0.247382	1	1	0	0	0	SLAM+MEP,
775	export_D11 HSC SC3_Vi0.csv	D11	SC3	Vi	HSC	ckit+SCA1-	TT23	23	24	439	152274	108294	0.439622	2035.89	62.1187	897.07	26722.9	27.956	1107.66	116.494	646.781	132.816	187821	114836	-13.09	7083.54	5172.14	49528.6	21562.7	1821.47	-16.1815	4.2063	-0.251417	1	1	0	0	0	GMP,
776	export_D12 HSC SC3_CV1.csv	D12	SC3	CV	HSC	ckit+SCA1-	TT23	23	24	440	135754	90367.4	17495.6	680.399	74.824	760.768	7134.96	180.299	1278.6	125.853	216.467	20.3102	182736	101449	126202	7399.81	4903.43	12098.9	12637.9	2228.53	37.4516	4.10248	-0.16555	1	1	0	0	0	GMP,
777	export_D12 HSC SC3_VC1.csv.1	D12	SC3	VC	HSC	HSC_ST	TT23	23	24	441	104486	52035.5	8013.28	83.258	133.433	92.6444	16389.4	-34.1035	-12.9899	5786.19	369.953	68.8535	205731	130719	58520.6	-82.3102	6793.41	36082.6	14406.4	38562.3	313.271	-0.720485	-3.27859	1	2	0	0	0	SLAM-HSC,ST-HSC,
778	export_D12 HSC SC3_VC1.csv.2	D12	SC3	VC	HSC	HSC_SLAM	TT23	23	24	441	97984.6	63907.9	8816.74	1545.96	89.628	202.759	19162.4	-153.485	-15.3717	5448.76	407.847	128.243	205731	130719	58520.6	-82.3102	6793.41	36082.6	14406.4	38562.3	313.271	1.21371	-5.76823	2	2	0	0	0	SLAM-HSC,ST-HSC,
779	export_D12 HSC SC3_Vi0.csv	D12	SC3	Vi	HSC	ckit-	TT23	23	24	442	125964	80749.4	3.42084	438.73	193.16	316.01	28752.6	-253.156	145.109	4585.57	124.784	77.8471	160068	104199	-2.38	2633.6	4779.74	30979.4	6301.36	31744	48.8875	-0.498457	-4.43367	1	1	0	0	0	SLAM-HSC,
780	export_D2 MPP SC2_VC1.csv.1	D2	SC2	VC	MPP	MPP	TT23	23	24	443	105519	52399.2	6745.11	-42.9604	850.176	208.013	14049.3	131.318	124.824	1667.08	296.198	83.1371	204398	128170	45502	714.208	4994.22	30265.1	-304.416	36316.3	3477.94	-1.92371	-2.37273	1	2	0	0	0	MPP,MPP,
781	export_D2 MPP SC2_VC1.csv.2	D2	SC2	VC	MPP	MPP	TT23	23	24	443	117469	76909.5	7956.38	76.7819	1033.67	105.05	18532.7	-8.63776	269.867	1750.84	353.741	175.815	204398	128170	45502	714.208	4994.22	30265.1	-304.416	36316.3	3477.94	-2.20629	-2.49814	1	2	0	0	0	MPP,MPP,
782	export_D3 ST-HSC SC2_CV0.csv	D3	SC2	CV	ST-HSC	HSC_ST	TT23	23	24	444	108600	58805.6	23557.4	197.161	406.189	240.771	9727.58	18.5151	84.4106	745.44	418.639	86.8691	144884	69137.8	107100	1750.76	4774.12	7339.22	658.504	7655.26	6.21772	-2.43153	-2.73766	1	1	0	0	0	ST-HSC,
783	export_D4 ST-HSC SC2_VC0.csv	D4	SC2	VC	ST-HSC	HSC_ST	TT23	23	24	445	143769	87988.6	7141.84	32.4741	393.851	261.293	19354.9	72.1159	1471.53	237.285	584.828	70.0458	160050	83079.9	28663.5	5250.18	5013.83	18445.4	385.169	2461.07	332.163	-2.15812	-0.0446123	1	1	0	0	0	ST-HSC,
784	export_D4 ST-HSC SC2_Vi0.csv	D4	SC2	Vi	ST-HSC	HSC_ST	TT23	23	24	446	112277	52298.4	0.25615	244.87	247.758	-14.8522	22655.4	96.2912	34.6146	336.525	219.057	101.878	128501	61129.1	-13.09	71.5723	4682.36	24261.1	1109.13	3430.12	76.9637	1.02018	-0.385949	1	1	0	0	0	ST-HSC,
785	export_D5 HSC SC2_CF1.csv	D5	SC2	CF	HSC	ckit+SCA1-	TT23	23	24	447	110264	58177.3	19186.7	615.854	96.4779	85.9383	18.5125	130.65	729.363	44.2976	189.414	44.8535	144573	91511	130206	5489.89	6238.95	-24.9568	12292.3	1439.94	144.856	5.17224	1.59454	1	1	0	0	0	SLAM+MEP,
786	export_D5 HSC SC2_CV1.csv	D5	SC2	CV	HSC	ckit+SCA1-	TT23	23	24	448	106634	51163	16847.2	786.181	83.7011	134.321	7741.53	-2.44617	34.158	13.6108	333.707	168.305	171972	95864	125474	537.641	8750.11	13028	13116.8	1527.6	157.191	4.7013	1.08507	1	1	0	0	0	SLAM+MEP,
787	export_D5 HSC SC2_VC0.csv	D5	SC2	VC	HSC	HSC_SLAM	TT23	23	24	449	135712	91230.1	13799.6	1085.87	295.717	222.899	27175.6	-78.6535	63.0596	2517.51	436.549	145.993	168686	91074.3	47119.2	-170.223	7921.79	25810	14171.3	37222	156.497	0.219464	-5.12397	1	1	0	0	0	SLAM-HSC,
788	export_D6 HSC SC2_CF0.csv	D6	SC2	CF	HSC	ckit+SCA1-	TT23	23	24	450	136077	92476.4	25185.8	1158.8	24.0188	34.9624	30.9201	218.028	559.995	111.707	396.322	190.975	131647	71295.3	86107.2	1164.2	6323.59	-42.696	14831.3	1218.75	11.2265	4.74651	0.0131575	1	1	0	0	0	SLAM+MEP,
789	export_D6 HSC SC2_Vi0.csv	D6	SC2	Vi	HSC	ckit+SCA1-	TT23	23	24	451	134272	103764	5.14372	2107.15	45.0548	41.7597	18918	161.856	190.012	44.5812	258.736	69.573	175677	152224	-14.28	4071.79	5461.1	49405.8	23795.4	1799.85	50.3393	5.43655	0.171704	1	1	0	0	0	SLAM+MEP,
790	export_D7 MPP SC3_CF0.csv	D7	SC3	CF	MPP	MPP	TT23	23	24	452	118498	79068.9	22113.8	-27.5532	2816.6	211.127	81.7848	74.2685	1803.55	1365.87	341.957	162.985	150592	89484.4	111076	6527.53	4412.88	-25.206	228.913	12427.6	4625.07	-2.41563	-2.23178	1	1	0	0	0	MPP,
791	export_D7 MPP SC3_CV1.csv	D7	SC3	CV	MPP	SLAM+Flt3+	TT23	23	24	453	113687	44145	18169.3	464.914	534.968	150.119	6638.3	-126.095	329.44	4196.93	202.846	36.1459	215149	145577	138489	1631.4	7442.61	12021	1222.08	52495.8	1753.88	-0.774458	-4.69673	1	1	0	0	0	SLAM+FLT3+,
792	export_D7 MPP SC3_VC1.csv	D7	SC3	VC	MPP	HSC_ST	TT23	23	24	454	128258	81111.3	9122.2	334.402	232.567	115.198	17057.3	179.11	1051.85	426.479	463.047	23.7543	143257	72594.8	41794	6137.75	5035.12	19560.1	-642.217	3103.03	796.539	1.05157	-1.34154	1	1	0	0	0	SLAM-HSC,
793	export_E10 ST-HSC SC3_CF0.csv	E10	SC3	CF	ST-HSC	ckit-	TT23	23	24	455	124842	58494.5	27390.6	750.033	474.158	103.072	31.2055	12.4546	190.152	1978.26	132.151	162.973	143118	113129	96266.2	3104.87	3048.38	-14.1102	1176.09	45901.7	651.279	-0.161529	-4.73595	1	1	0	0	0	SLAM-HSC,
794	export_E10 ST-HSC SC3_CV1.csv.1	E10	SC3	CV	ST-HSC	ckit+SCA1-	TT23	23	24	456	127398	62589.8	15566.9	54.6999	101.878	100.709	6058.19	138.27	2139.46	114.394	318.234	110.94	174665	92653.4	125083	6297.45	7568.2	9246.69	599.266	911.613	244.011	0.550527	1.663	1	2	0	0	0	MEP,MEP,
795	export_E10 ST-HSC SC3_CV1.csv.2	E10	SC3	CV	ST-HSC	ckit+SCA1-	TT23	23	24	456	130778	58319.6	16562	97.1195	84.2824	140.171	6545.22	119.859	1937.14	182.675	303.744	168.228	174665	92653.4	125083	6297.45	7568.2	9246.69	599.266	911.613	244.011	0.313428	0.747664	1	2	0	0	0	MEP,MEP,
796	export_E11 HSC SC3_CF1.csv.1	E11	SC3	CF	HSC	ckit+SCA1-	TT23	23	24	457	118723	56667.3	15929.6	697.054	139.75	63.8796	33.8742	144.643	673.081	85.3885	335.473	106.968	230077	127104	134460	7179.49	4682.76	-27.5921	10397.2	838.493	121.494	3.82422	0.358208	1	2	0	0	0	SLAM+MEP,SLAM+MEP,
797	export_E11 HSC SC3_CF1.csv.2	E11	SC3	CF	HSC	ckit+SCA1-	TT23	23	24	457	129032	83141.9	17255.3	499.637	104.084	168.018	40.7433	100.891	734.374	71.8245	254.384	148.223	230077	127104	134460	7179.49	4682.76	-27.5921	10397.2	838.493	121.494	3.74783	0.639102	1	2	0	0	0	SLAM+MEP,SLAM+MEP,
798	export_E11 HSC SC3_CV1.csv	E11	SC3	CV	HSC	ckit+SCA1-	TT23	23	24	458	106782	69140.9	16184.7	2324.23	73.4562	1494.56	10135.8	34.8109	852.395	45.1191	178.536	2.57626	199526	138180	111432	4742.17	6319.09	15802.4	18960.2	53860.9	183.535	4.27476	-0.315387	1	1	0	0	0	GMP,
799	export_E2 MPP SC2_VC0.csv	E2	SC2	VC	MPP	MPP	TT23	23	24	459	97711.4	81128.2	11260.3	89.5335	1515.85	292.837	29894.9	61.5206	812.374	392.537	358.61	6.45183	172457	108921	57040.3	7862.34	3841.67	30915	763.564	6244.53	4677.45	-3.0751	-1.61677	1	1	0	0	0	MPP,
800	export_E3 ST-HSC SC2_CF0.csv	E3	SC2	CF	ST-HSC	ckit+SCA1-	TT23	23	24	460	148619	85160.3	32361.1	119.935	126.848	105.837	50.195	144.743	1258.9	192.286	364.249	163.014	132807	69240.2	116004	5632.24	5432.48	24.0416	-824.476	5018.91	137.073	0.420597	0.719442	1	1	0	0	0	MEP,
801	export_E3 ST-HSC SC2_CV1.csv	E3	SC2	CV	ST-HSC	ckit+SCA1-	TT23	23	24	461	106761	50379.2	16754.2	576.612	137.725	198.443	7567.16	63.5156	845.862	167.404	732.648	220.033	176386	100166	117915	1723.76	8746.99	9663.77	2233.42	1607.87	107.522	3.31198	0.910771	1	1	0	0	0	SLAM+MEP,
802	export_E3 ST-HSC SC2_Vi0.csv	E3	SC2	Vi	ST-HSC	ckit+SCA1-	TT23	23	24	462	121348	72359.8	1.39612	145.265	207.892	21.2478	22573.1	106.596	165.381	165.02	352.649	108.232	147338	86035.8	-15.47	37.6411	5945.01	25347.3	548.387	3590.71	276.749	0.522234	1.42988	1	1	0	0	0	MEP,
803	export_E4 ST-HSC SC2_VC1.csv	E4	SC2	VC	ST-HSC	HSC_ST	TT23	23	24	463	101322	49134.8	7178.88	71.0882	442.361	138.647	14872.2	99.2236	342.357	245.622	347.342	44.4444	180240	163505	61727.7	401.996	5359.97	36512	513.258	3597.13	487.027	-1.78769	-0.224453	1	1	0	0	0	ST-HSC,
804	export_E5 HSC SC2_CV1.csv.1	E5	SC2	CV	HSC	ckit-	TT23	23	24	464	118171	51931.5	12218.7	360.028	59.8129	190.809	5001.23	2.25961	880.003	84.9921	141.303	24.1223	159280	78309.1	90632.8	5597.09	5296.11	8713.39	4940.2	842.025	106.149	3.4964	2.81514	1	2	0	0	0	MEP,ckit-,
805	export_E5 HSC SC2_CV1.csv.2	E5	SC2	CV	HSC	ckit+SCA1-	TT23	23	24	464	105324	52849.2	13910.2	291.596	95.0573	136.299	6189.39	44.8671	874.969	67.858	311.039	115.695	159280	78309.1	90632.8	5597.09	5296.11	8713.39	4940.2	842.025	106.149	3.18328	2.21914	2	2	0	0	0	MEP,ckit-,
806	export_E5 HSC SC2_VC0.csv	E5	SC2	VC	HSC	HSC_SLAM	TT23	23	24	465	95243.9	49556.1	15961.2	2254.41	156.237	110.677	37765.5	29.7681	7.49046	1081.91	218.085	191.152	137014	77552.3	52888.4	21.0714	2363.81	28937.3	15861.6	11446.8	204.614	2.81788	-3.04628	1	1	0	0	0	SLAM-HSC,
807	export_E5 HSC SC2_Vi0.csv	E5	SC2	Vi	HSC	ckit+SCA1-	TT23	23	24	466	160190	128822	1.83898	105.042	141.527	166.067	22582.5	133.316	1648.34	94.2706	322.885	113.579	164777	140672	19.04	5264.85	9169.21	48155.6	3003.98	4422.86	125.749	0.357144	1.55421	1	1	0	0	0	MEP,
808	export_E6 HSC SC2_CF1.csv	E6	SC2	CF	HSC	HSC_ST	TT23	23	24	467	117499	66629.9	14966.2	204.428	97.7763	39.386	31.1966	97.5902	251.441	311.087	368.278	1.35274	171774	105096	116090	913.24	8616.87	-5.09833	3226.72	4574.21	-3.5316	0.809268	-0.459996	1	1	0	0	0	ST-HSC,
809	export_E7 MPP SC3_CV0.csv	E7	SC3	CV	MPP	ckit+SCA1-	TT23	23	24	468	98499.2	44471.1	22452.1	188.592	1087.78	323.268	8786.77	5.10072	404.707	194.343	243.413	104.391	133585	78948.2	103912	4968.81	3812.87	7758.52	104.257	4063.13	2238.54	-3.33611	-0.544517	1	1	0	0	0	MEP,
810	export_E7 MPP SC3_Vi0.csv	E7	SC3	Vi	MPP	MPP	TT23	23	24	469	127731	79955.3	8.29783	46.2204	1665.26	422.947	28330.8	-25.2961	1917.11	1192.38	252.289	139.49	158396	87736.3	7.14	5232.45	2457.35	30242.6	333.816	5823.89	3269.26	-2.58177	-2.2761	1	1	0	0	0	MPP,
811	export_E9 ST-HSC SC3_CF0.csv	E9	SC3	CF	ST-HSC	ckit-	TT23	23	24	470	121243	68278	28425.5	631.565	143.485	133.148	41.8328	39.0061	97.8934	1263.33	146.22	183.954	148657	90763.7	115524	1343.85	5356.85	-2.36233	-275.989	10283.4	129.27	1.33774	-3.67648	1	1	0	0	0	SLAM-HSC,
812	export_E9 ST-HSC SC3_VC0.csv	E9	SC3	VC	ST-HSC	HSC_SLAM	TT23	23	24	471	148912	106715	9644.09	466.08	268.655	49.5704	29902.8	7.58587	1124.63	1491.67	231.628	143.343	155539	86817.6	39334.3	4581.19	6750.18	23286.5	1210.26	2490.14	283.189	0.92138	-3.42028	1	1	0	0	0	SLAM-HSC,
813	export_F10 ST-HSC SC3_CF0.csv	F10	SC3	CF	ST-HSC	ckit+SCA1-	TT23	23	24	472	157831	87786.3	22020.3	166.82	107.916	559.555	75.2667	110.298	1416.83	198.501	261.459	53.512	141704	70545.6	77945	4856.03	4840.24	-9.68179	-531.309	1904.9	148.361	-2.17381	1.62985	1	1	0	0	0	GMP,
814	export_F10 ST-HSC SC3_CV0.csv	F10	SC3	CV	ST-HSC	ckit-	TT23	23	24	473	121615	87124	24123	301.577	517.84	326.859	10390	-66.9213	331.028	1583.99	136.547	32.4384	147816	63549.6	105923	2064.23	2167.65	7837.7	-289.795	23136.2	507.013	-1.72465	-3.84312	1	1	0	0	0	SLAM+FLT3+,
815	export_F10 ST-HSC SC3_Vi1.csv.1	F10	SC3	Vi	ST-HSC	ckit+SCA1-	TT23	23	24	474	159272	162000	13.6749	902.657	813.416	757.348	20382.6	1236.43	490.379	-38.6485	156.073	75.6059	155366	96563.7	-2.38	919.112	6237.19	24009.1	1479.2	18347	285.511	-3.53306	3.67354	1	2	0	0	0	SLAM-HSC,GMP,
816	export_F10 ST-HSC SC3_Vi1.csv.2	F10	SC3	Vi	ST-HSC	HSC_SLAM	TT23	23	24	474	115684	74887.3	0.814192	509.631	289.656	141.749	22894.9	-169.222	20.918	3176.94	255.772	103.02	155366	96563.7	-2.38	919.112	6237.19	24009.1	1479.2	18347	285.511	-0.106208	-4.72784	2	2	0	0	0	SLAM-HSC,GMP,
817	export_F11 HSC SC3_CV0.csv	F11	SC3	CV	HSC	HSC_ST	TT23	23	24	475	109731	71952.9	27352.8	387.436	212.479	-24.8605	12532.2	185.688	87.198	1650.01	205.171	203.942	141322	90935	91352.7	933.849	3472.92	8749.09	3975.98	12920.9	191.285	1.01049	-3.36169	1	1	0	0	0	SLAM-HSC,
818	export_F11 HSC SC3_VC0.csv	F11	SC3	VC	HSC	HSC_SLAM	TT23	23	24	476	126200	76831.3	9568.16	2162.59	127.225	116.437	25677.5	41.3422	99.5347	639.706	175.218	141.969	152014	79371.8	35241.9	-223.031	7920.71	22323.2	23892.8	23521.5	-10.6462	2.87717	-2.87294	1	1	0	0	0	SLAM-HSC,
819	export_F11 HSC SC3_Vi0.csv	F11	SC3	Vi	HSC	HSC_SLAM	TT23	23	24	477	114068	69645.2	1.13175	840.74	132.176	35.7961	42339.6	7.33964	628.596	951.551	225.221	46.6779	132477	83071.5	-26.18	1774.9	7368.84	44297.5	9484.95	6892.89	88.6603	1.47088	-3.31841	1	1	0	0	0	SLAM-HSC,
820	export_F12 HSC SC3_CF0.csv	F12	SC3	CF	HSC	HSC_SLAM	TT23	23	24	478	151479	113326	33616.1	1080.99	137.917	-12.5945	61.5337	146.106	180.221	1076.16	263.704	72.5391	153545	98208.3	122243	469.78	9984.28	-34.8462	16085.8	3837.4	19.7955	1.58522	-3.35466	1	1	0	0	0	SLAM-HSC,
821	export_F12 HSC SC3_CV0.csv	F12	SC3	CV	HSC	ckit-	TT23	23	24	479	100567	56807.7	25178.4	1788.72	45.6406	93.5006	10272.4	33.2714	67.8217	-35.6875	104.395	205.361	223701	165823	163010	979.015	3758.3	15353.9	6302.62	957.473	63.2622	5.73511	0.814801	1	1	0	0	0	ckit-,
822	export_F12 HSC SC3_VC1.csv	F12	SC3	VC	HSC	ckit+SCA1-	TT23	23	24	480	130632	95092.7	6874.64	1230.91	60.5919	101.37	17241.7	53.1759	789.608	77.87	360.708	3.54121	154851	71139.4	28517.2	2253.54	4809.82	17969.9	5514.95	1950.08	116.272	5.03225	0.0475059	1	1	0	0	0	SLAM+MEP,
823	export_F2 MPP SC2_VC0.csv	F2	SC2	VC	MPP	MPP	TT23	23	24	481	128851	91267.8	9583.44	94.3557	500.881	109.255	26650.2	-28.4086	646.596	1699.81	352.821	5528289	155106	93382.9	32941.6	2234.77	4774.03	23866.1	-473.057	10468.2	766.241	-1.97626	-2.51561	1	1	0	0	0	MPP,
824	export_F3 ST-HSC SC2_CF0.csv	F3	SC2	CF	ST-HSC	HSC_ST	TT23	23	24	482	132695	82364.9	27434.8	230.789	146.122	206.462	45.1279	99.4486	1210.33	396.241	414.605	77.9233	144217	77452.3	113778	5657.56	2457.11	-31.7432	217.924	8580.34	311.637	0.25561	-0.913417	1	1	0	0	0	ST-HSC,
825	export_F3 ST-HSC SC2_CV1.csv.1	F3	SC2	CV	ST-HSC	ckit+SCA1-	TT23	23	24	483	107279	47494.8	16034.6	120.733	245.004	438.14	7469.38	137.449	745.435	131.159	354.195	43.8112	150251	109787	138524	7799.58	4356.84	11158.8	241.928	6140.45	471.438	-2.28352	1.2974	1	2	0	0	0	GMP,GMP,
826	export_F3 ST-HSC SC2_CV1.csv.2	F3	SC2	CV	ST-HSC	ckit+SCA1-	TT23	23	24	483	124234	50635.4	15693.5	81.734	172.582	650.342	7998.36	68.034	721.684	140.885	380.024	95.9759	150251	109787	138524	7799.58	4356.84	11158.8	241.928	6140.45	471.438	-2.45584	1.89407	1	2	0	0	0	GMP,GMP,
827	export_F3 ST-HSC SC2_VC1.csv.1	F3	SC2	VC	ST-HSC	ckit+SCA1-	TT23	23	24	484	82638.9	46948.6	5065.8	180.055	75.0036	61.961	11294.2	116.913	46.6811	37.4543	197.212	6.27099	168585	87393.6	44100.2	1169.13	6100.52	25206.2	2333.38	2648.3	-3.82151	2.68498	3.22195	1	2	0	0	0	MEP,MEP,
828	export_F3 ST-HSC SC2_VC1.csv.2	F3	SC2	VC	ST-HSC	ckit+SCA1-	TT23	23	24	484	83437.8	58761.9	5427.57	183.921	70.2631	37.1195	12841.7	109.385	56.9037	40.1947	251.767	168.902	168585	87393.6	44100.2	1169.13	6100.52	25206.2	2333.38	2648.3	-3.82151	2.45923	3.2584	1	2	0	0	0	MEP,MEP,
829	export_F3 ST-HSC SC2_Vi1.csv	F3	SC2	Vi	ST-HSC	ckit+SCA1-	TT23	23	24	485	117043	65274.1	1.50518	164.858	102.851	65.0105	16516.2	104.903	584.16	79.9798	289.603	145.978	170204	87786.3	0	1596.08	4620.33	30847.2	2854.76	7418.26	225.657	1.54117	2.66723	1	1	0	0	0	MEP,
830	export_F4 ST-HSC SC2_Vi0.csv	F4	SC2	Vi	ST-HSC	HSC_ST	TT23	23	24	486	164974	130552	2.54543	88.422	131.119	128.721	28571.6	206.851	3135.93	369.821	513.733	86.4641	150905	82668.1	8.33	6394.63	7413.02	33377.5	316.356	3846.7	158.51	-0.452068	-0.230548	1	1	0	0	0	ST-HSC,
831	export_F5 HSC SC2_CF0.csv	F5	SC2	CF	HSC	ckit+SCA1-	TT23	23	24	487	146095	98119.2	31792.8	1497.74	42.515	480.269	43.0964	229.781	562.326	131.887	205.696	47.0905	137416	62513.1	89285.7	2615.77	3554.08	-57.1529	9701.07	664.997	167.247	4.27649	-0.319691	1	1	0	0	0	GMP,
832	export_F5 HSC SC2_CV0.csv	F5	SC2	CV	HSC	ckit+SCA1-	TT23	23	24	488	117237	86448.7	26367.6	453.079	93.8006	191.832	13109	113.98	820.579	126.303	209.663	190.199	145855	68824.8	88587.2	3595.63	6791.99	8320.45	3778.41	2352.8	332.072	3.44813	0.455925	1	1	0	0	0	SLAM+MEP,
833	export_F5 HSC SC2_VC0.csv	F5	SC2	VC	HSC	ckit+SCA1-	TT23	23	24	489	132880	76180.5	10557.5	1211.86	64.943	128.699	26022.7	-9.6057	60.7013	49.051	168.633	203.883	147051	79901.4	33083.2	614.742	2813.61	23076.7	12060.8	1510.86	49.6018	5.59863	0.917586	1	1	0	0	0	SLAM+MEP,
834	export_F6 HSC SC2_CV0.csv	F6	SC2	CV	HSC	ckit+SCA1-	TT23	23	24	490	166614	88987.6	27357.6	554.761	40.7059	72.4659	12627.4	84.7235	344.94	121.346	227.522	12.9805	140958	76180.2	93921.9	1878.94	10407.8	8023.76	5861.76	1185.63	-22.2982	3.38113	-0.247024	1	1	0	0	0	SLAM+MEP,
835	export_F6 HSC SC2_Vi0.csv	F6	SC2	Vi	HSC	HSC_SLAM	TT23	23	24	491	128016	102349	-0.035051	706.868	186.226	42.3994	29518.8	148.677	95.5587	1286.62	363.074	141.948	156440	81664.9	7.14	1227.56	5251.57	27396.7	7944.48	32584	-102.829	1.43176	-3.39294	1	1	0	0	0	SLAM-HSC,
836	export_F7 MPP SC3_CV0.csv	F7	SC3	CV	MPP	MPP	TT23	23	24	492	95966.3	98680.7	21645.6	228.21	819.058	577.503	7751.32	218.184	2462.55	521.999	443.134	54.3206	161136	91007.6	106147	3183.23	5273.42	7545.13	382.469	2412.33	1329.91	-2.59447	-2.90996	1	1	0	0	0	MPP,
837	export_F7 MPP SC3_VC0.csv	F7	SC3	VC	MPP	ckit+SCA1-	TT23	23	24	493	111674	77815.5	8499.97	65.8878	752.994	451.919	20554.3	60.9671	1050.86	123.085	441.065	225.125	151611	124608	62870.1	6094.07	5333.54	31622.4	1019.47	828.607	799.349	-3.46417	0.0656948	1	1	0	0	0	GMP,
838	export_F7 MPP SC3_Vi0.csv	F7	SC3	Vi	MPP	MPP	TT23	23	24	494	124757	65930.8	3.69666	126.497	1127.98	887.515	21185.6	186.566	2322.23	296.511	565.992	182.453	253758	160821	1.19	8751.04	7890.82	49395.6	2164.79	2008.33	3933.68	-3.87696	-0.25879	1	1	0	0	0	MPP,
839	export_F9 ST-HSC SC3_CF0.csv	F9	SC3	CF	ST-HSC	HSC_ST	TT23	23	24	495	104962	63189.8	24706.5	86.3984	180.189	133.018	37.255	33.5361	920.308	903.747	267.901	100.12	122657	65051.4	81404.3	2806.88	6446.37	13.2625	204.728	3961.23	578.656	-0.370933	-1.27256	1	1	0	0	0	ST-HSC,
840	export_F9 ST-HSC SC3_Vi0.csv	F9	SC3	Vi	ST-HSC	ckit-	TT23	23	24	496	133152	90247.1	0.049422	482.254	418.257	254.057	37490.5	-208.186	235.017	6830.81	137.319	29.373	166647	93705.4	8.33	1008.64	5103	32867.3	-277.605	57156.1	50.5091	-0.864865	-4.65086	1	1	0	0	0	SLAM-HSC,
841	export_G10 ST-HSC SC3_CF0.csv	G10	SC3	CF	ST-HSC	MPP	TT23	23	24	497	112820	83439.1	22691.5	-72.6517	503.94	169.167	50.2451	102.106	1757.65	1430.39	315.331	50.2607	134393	84504.3	102824	2946.28	4997.67	-44.3573	1039.29	8422.96	505.96	-1.95683	-2.24535	1	1	0	0	0	MPP,
842	export_G11 HSC SC3_CV1.csv.1	G11	SC3	CV	HSC	ckit+SCA1-	TT23	23	24	498	138324	72734.2	20512.2	964.012	87.2383	52.5751	9367.68	74.1925	154.544	10.0006	310.103	151.305	182446	123283	149359	2887.91	6164.55	14206.6	15750.6	729.128	-30.5198	5.17851	0.749017	1	2	0	0	0	SLAM+MEP,SLAM+MEP,
843	export_G11 HSC SC3_CV1.csv.2	G11	SC3	CV	HSC	ckit+SCA1-	TT23	23	24	498	115339	63400.6	21361.3	950.508	75.5811	15.9204	9886.22	118.977	154.541	-22.0806	316.88	199.083	182446	123283	149359	2887.91	6164.55	14206.6	15750.6	729.128	-30.5198	5.27774	0.828199	1	2	0	0	0	SLAM+MEP,SLAM+MEP,
844	export_G11 HSC SC3_Vi1.csv.1	G11	SC3	Vi	HSC	ckit+SCA1-	TT23	23	24	499	131063	80700.7	1.03484	297.699	93.3432	93.8652	18369.9	152.528	1411.53	71.3009	177.559	24.3829	157987	104359	20.23	6022.19	5138.32	39108.8	5150.14	727.257	-0.760181	3.29108	2.89182	1	2	0	0	0	ckit-,MEP,
845	export_G11 HSC SC3_Vi1.csv.2	G11	SC3	Vi	HSC	ckit-	TT23	23	24	499	129365	85866.3	1.73745	392.786	42.1229	46.7933	19384.3	209.774	1428.64	62.9381	146.023	154.313	157987	104359	20.23	6022.19	5138.32	39108.8	5150.14	727.257	-0.760181	4.18457	2.9116	2	2	0	0	0	ckit-,MEP,
846	export_G12 HSC SC3_CF0.csv	G12	SC3	CF	HSC	HSC_SLAM	TT23	23	24	500	107289	90039.5	28829.8	1143.71	182.655	12.789	49.9832	59.3312	89.6477	1840.17	190.965	168.817	163665	81346	111196	125.733	5931.14	-27.0807	7094.64	28120.4	-48.7131	1.59974	-3.38786	1	1	0	0	0	SLAM-HSC,
847	export_G12 HSC SC3_CV0.csv	G12	SC3	CV	HSC	HSC_SLAM	TT23	23	24	501	110433	68539.4	25616.2	3895.31	152.156	110.858	10960.8	-21.263	1.83465	1065.35	221.214	173.682	176096	115224	171842	1831.24	6568.34	13831.1	60419.9	59444.7	59.1931	2.98463	-3.01207	1	1	0	0	0	SLAM-HSC,
848	export_G12 HSC SC3_VC1.csv.1	G12	SC3	VC	HSC	ckit-	TT23	23	24	502	105666	45780	4603.49	394.184	111.255	50.3901	16107.5	163.383	529.121	34.5474	113.642	42.4156	128117	105974	24800.8	5928.42	6385.56	33623.9	3434.05	1158.82	156.97	4.27637	3.01356	1	2	0	0	0	ckit-,ckit-,
849	export_G12 HSC SC3_VC1.csv.2	G12	SC3	VC	HSC	ckit-	TT23	23	24	502	110488	40860.4	4937.44	291.745	70.57	119.552	17513.2	88.8321	589.781	46.5826	136.085	168.331	128117	105974	24800.8	5928.42	6385.56	33623.9	3434.05	1158.82	156.97	3.55541	3.03021	1	2	0	0	0	ckit-,ckit-,
850	export_G12 HSC SC3_Vi0.csv	G12	SC3	Vi	HSC	ckit-	TT23	23	24	503	101142	78089.4	0.009939	1720.54	105.221	105.135	26196.2	-59.6387	17.9476	3561.12	119.599	188.294	147562	68979.5	-10.71	322.235	6666.93	29600	10990.7	10454.5	-20.3506	1.41597	-5.49406	1	1	0	0	0	SLAM-HSC,
851	export_G2 MPP SC2_CF0.csv	G2	SC2	CF	MPP	ckit+SCA1-	TT23	23	24	504	138131	79831.4	28089.3	101.532	702.777	336.744	56.2216	103.063	912.205	43.0893	315.227	196.86	178298	216294	110948	4812.72	8303.65	-25.2524	1988.2	3108.63	1047.31	-3.15683	0.505672	1	1	0	0	0	MEP,
852	export_G3 ST-HSC SC2_CF0.csv	G3	SC2	CF	ST-HSC	ckit+SCA1-	TT23	23	24	505	115809	84341.8	40326.5	313.96	89.457	45.3015	27.5515	119.378	699.045	84.5286	258.757	1.46646	139475	80370.2	120944	5064.74	4570.81	-0.813015	983.065	939.364	240.311	3.11367	2.82879	1	1	0	0	0	SLAM+MEP,
853	export_G3 ST-HSC SC2_VC0.csv	G3	SC2	VC	ST-HSC	HSC_ST	TT23	23	24	506	169625	116416	12023.6	43.3495	191.718	930.153	32865	148.252	1822.24	233.09	946.909	29.8523	163070	98610.5	43225.6	5366.21	3580.07	28966.1	-494.982	2959.68	356.871	-3.61629	0.843251	1	1	0	0	0	ST-HSC,
854	export_G3 ST-HSC SC2_Vi0.csv	G3	SC2	Vi	ST-HSC	HSC_ST	TT23	23	24	507	163255	120505	0.915322	41.8386	281.276	122.812	28829.6	138.792	1406.9	421.198	631.769	81.1229	129907	87116.3	-2.38	5635.47	4669.11	33076.8	1565.65	7672.67	519.79	-0.933124	-0.176199	1	1	0	0	0	ST-HSC,
855	export_G4 ST-HSC SC2_VC1.csv	G4	SC2	VC	ST-HSC	ckit+SCA1-	TT23	23	24	508	183592	124821	5437.25	43.2711	97.6164	5142.42	12487.8	-200.874	520.839	-61.1165	252.107	157.827	188096	114371	54609.1	3382.44	3210.8	22255.1	327.337	1745.52	59.5395	-5.15926	3.84173	1	1	0	0	0	GMP,
856	export_G5 HSC SC2_CF0.csv	G5	SC2	CF	HSC	HSC_SLAM	TT23	23	24	509	123847	79286.3	22294.4	1025.91	82.9586	54.0997	48.9403	101.614	920.495	284.832	206.377	109.739	138620	70766.9	84619.7	2469.06	6223.6	-23.2627	10996.2	1173.57	-13.428	3.37577	-1.40535	1	1	0	0	0	SLAM-HSC,
857	export_G5 HSC SC2_CV0.csv	G5	SC2	CV	HSC	HSC_SLAM	TT23	23	24	510	118902	70114.6	26922.9	609.717	213.654	22.1544	12604.3	84.0086	88.8732	680.37	353.059	77.7991	155026	100900	119421	1999.88	4553.35	8811.31	3942.2	9551.4	41.9791	1.53079	-3.23769	1	1	0	0	0	SLAM-HSC,
858	export_G5 HSC SC2_VC0.csv	G5	SC2	VC	HSC	HSC_ST	TT23	23	24	511	121742	74529.4	9252.18	112.459	202.81	128.56	20209.6	96.5246	57.6349	2072.35	278.341	79.3575	183133	236111	44628.6	3026.73	7151.95	36357.2	14438.1	18149.6	623.939	-0.782487	-2.95368	1	1	0	0	0	ST-HSC,
859	export_G5 HSC SC2_Vi1.csv.1	G5	SC2	Vi	HSC	ckit+SCA1-	TT23	23	24	512	120828	57016.4	1.50135	527.116	93.9783	117.628	17704.7	161.815	499.146	31.7965	422.369	9.91246	133044	103828	-11.9	3950.21	6154.31	34652.6	11593.7	2756.47	-14.8684	4.14332	1.32838	1	2	0	0	0	SLAM+MEP,SLAM+MEP,
860	export_G5 HSC SC2_Vi1.csv.2	G5	SC2	Vi	HSC	ckit+SCA1-	TT23	23	24	512	116391	66804.1	1.22508	574.157	97.9908	105.704	17851.9	119.961	675.37	72.4114	320.549	59.2466	133044	103828	-11.9	3950.21	6154.31	34652.6	11593.7	2756.47	-14.8684	3.82687	0.655877	1	2	0	0	0	SLAM+MEP,SLAM+MEP,
861	export_G6 HSC SC2_CV1.csv.1	G6	SC2	CV	HSC	ckit+SCA1-	TT23	23	24	513	118898	61246.8	15032.9	379.109	83.0973	112.169	6294.82	131.596	790.513	174.779	228.274	81.6028	152465	100009	128449	4016.94	4519.18	10205.4	4173.4	6348.59	-69.9256	2.31918	-0.32487	1	2	0	0	0	SLAM+MEP,SLAM+MEP,
862	export_G6 HSC SC2_CV1.csv.2	G6	SC2	CV	HSC	ckit+SCA1-	TT23	23	24	513	132788	96023.4	15622.1	388.87	100.733	97.8385	6617.95	123.223	714.126	173.643	341.59	83.499	152465	100009	128449	4016.94	4519.18	10205.4	4173.4	6348.59	-69.9256	2.23449	-0.298206	1	2	0	0	0	SLAM+MEP,SLAM+MEP,
863	export_G7 MPP SC3_CF0.csv	G7	SC3	CF	MPP	SLAM+Flt3+	TT23	23	24	514	102057	97522.5	25976.4	641.503	728.353	96.4423	87.0246	191.07	2665.22	1147.66	391.377	18.2291	144243	77407.1	110756	5759.32	4375.39	-25.8335	-676.466	15666.5	716.449	-0.861775	-4.11036	1	1	0	0	0	SLAM+FLT3+,
864	export_G7 MPP SC3_CV1.csv	G7	SC3	CV	MPP	MPP	TT23	23	24	515	115959	72648.1	19909.3	38.8688	1007.39	39.3546	7954.86	169.742	1891.01	993.347	203.154	109.288	134194	76913.3	99653	4899.05	4113.3	7941.67	-26.8837	16196.7	906.792	-2.47839	-2.16602	1	1	0	0	0	MPP,
865	export_G7 MPP SC3_VC0.csv	G7	SC3	VC	MPP	HSC_ST	TT23	23	24	516	100610	55837.3	5547.54	61.5	411.301	131.002	19793.8	13.5021	173.427	232.003	337.579	185.296	136105	72104.5	39066.5	585.837	5171.29	22114.4	-26.2076	19805.4	735.516	-1.72886	-0.136897	1	1	0	0	0	ST-HSC,
866	export_G8 MPP SC3_Vi0.csv	G8	SC3	Vi	MPP	HSC_ST	TT23	23	24	517	148222	99628.3	6.4485	-7.06958	282.638	64.5397	27666.6	175.954	1015.19	2323.66	573.31	98.3886	156697	90160.4	4.76	1857.17	3594.42	28807	175.383	8614.49	757.639	-1.49372	-2.42023	1	1	0	0	0	ST-HSC,
867	export_G9 ST-HSC SC3_CF0.csv	G9	SC3	CF	ST-HSC	HSC_ST	TT23	23	24	518	121225	71352	25820.8	134.265	192.393	86.9306	65.7431	23.8339	920.128	222.393	377.303	156.945	138344	73177.9	96282.9	2753.36	7111.62	-28.852	-757.154	2253.59	42.1316	0.381958	0.656776	1	1	0	0	0	ST-HSC,
868	export_H10 ST-HSC SC3_VC1.csv.1	H10	SC3	VC	ST-HSC	ckit+SCA1-	TT23	23	24	519	136916	94068.1	6102.28	109.659	48.9503	818.791	14946.8	133.742	2177.06	90.5229	416.857	38.9678	176247	126297	42935.2	5938.92	6470.18	24608.3	80.9324	877.863	216.915	-2.8238	2.77667	1	2	0	0	0	GMP,GMP,
869	export_H10 ST-HSC SC3_VC1.csv.2	H10	SC3	VC	ST-HSC	ckit+SCA1-	TT23	23	24	519	138732	97044.6	5846.39	47.1155	81.3628	702.007	14840.7	115.232	1694.45	93.9509	317.834	91.0565	176247	126297	42935.2	5938.92	6470.18	24608.3	80.9324	877.863	216.915	-2.83644	2.88399	1	2	0	0	0	GMP,GMP,
870	export_H11 HSC SC3_CF0.csv	H11	SC3	CF	HSC	HSC_SLAM	TT23	23	24	520	84991.6	75166.3	26890.2	737.191	148.911	187.96	30.0886	-11.9902	30.0304	4343.3	284.676	150.058	146230	76520.6	97627.6	57.9308	3475.82	-25.1079	6330.07	19656.4	178.318	0.529731	-5.04473	1	1	0	0	0	SLAM-HSC,
871	export_H11 HSC SC3_VC0.csv	H11	SC3	VC	HSC	HSC_SLAM	TT23	23	24	521	110710	71766	12258	557.712	155.214	232.688	26804.2	-234.563	2.41253	7072.25	345.367	150.602	153424	89285.7	44030	73.2104	4768.15	23572.4	5087.61	22375.8	336.129	0.583713	-5.2523	1	1	0	0	0	SLAM-HSC,
872	export_H11 HSC SC3_Vi0.csv	H11	SC3	Vi	HSC	HSC_SLAM	TT23	23	24	522	105544	63121.9	-0.323517	3517.63	79.3226	165.235	24700.2	-15.6704	-45.3014	6026.13	240.48	199.2	162887	98911.6	92.82	-384.168	3332.17	29366.9	53210.9	10839.9	51.0747	1.58202	-5.74114	1	1	0	0	0	SLAM-HSC,
873	export_H12 HSC SC3_CF0.csv	H12	SC3	CF	HSC	ckit+SCA1-	TT23	23	24	523	113757	82820.8	26775.4	191.151	115.538	-24.7573	55.9688	108.385	235.128	191.687	240.628	63.1812	147861	73782.4	100588	541.69	4933.31	-28.4082	3621.58	1608.64	-66.004	1.10345	-0.0715397	1	1	0	0	0	MEP,
874	export_H12 HSC SC3_Vi0.csv	H12	SC3	Vi	HSC	ckit+SCA1-	TT23	23	24	524	105239	58164.2	1.3645	154.96	88.0764	116.232	26705.5	93.0125	191.668	179.952	276.821	101.086	143387	72308	34.51	2193.72	5242.34	28104.4	3486.03	903.432	149.213	1.00134	0.380634	1	1	0	0	0	MEP,
875	export_H2 MPP SC2_CF0.csv	H2	SC2	CF	MPP	MPP	TT23	23	24	525	100105	71540.1	22583.8	39.2221	1596.06	75.9378	27.1055	113.199	502.272	822.946	246.44	83.6003	146257	78189	104042	2468.09	3030.38	-18.7954	-320.018	20360.1	1977.52	-2.50785	-2.06632	1	1	0	0	0	MPP,
876	export_H2 MPP SC2_CV1.csv.1	H2	SC2	CV	MPP	HSC_ST	TT23	23	24	526	104841	82246.2	22596.2	219.367	444.064	431.454	9434.4	83.6797	503.161	615.969	387.241	95.0444	207965	120479	162587	2878.87	7359.64	13143.5	-595.919	27727.1	2764.62	-2.48157	-2.81558	1	2	0	0	0	ST-HSC,ST-HSC,
877	export_H2 MPP SC2_CV1.csv.2	H2	SC2	CV	MPP	HSC_ST	TT23	23	24	526	112137	74151.3	20866.7	222.048	451.051	331.393	8742.13	172.029	291.989	803.977	536.949	122.421	207965	120479	162587	2878.87	7359.64	13143.5	-595.919	27727.1	2764.62	-2.47138	-2.78795	1	2	0	0	0	ST-HSC,ST-HSC,
878	export_H2 MPP SC2_VC0.csv	H2	SC2	VC	MPP	ckit+SCA1-	TT23	23	24	527	108816	75334.7	7614.51	76.4035	1363.7	161.747	19007	83.4638	1159.63	170.761	543.521	172.47	152600	74478.5	33663.9	3094.65	5532.8	18200.8	1498.87	4186.3	1456.12	-3.14219	-0.804405	1	1	0	0	0	MEP,
879	export_H2 MPP SC2_Vi1.csv.1	H2	SC2	Vi	MPP	ckit+SCA1-	TT23	23	24	528	113636	66744.9	1.3234	122.89	296.231	135.806	19515.1	48.3389	659.007	182.704	330.156	30.8303	172230	114034	-10.71	2230.09	6507.05	34776.1	675.015	14882	1684.5	0.119762	0.69121	1	2	0	0	0	ST-HSC,MEP,
880	export_H2 MPP SC2_Vi1.csv.2	H2	SC2	Vi	MPP	HSC_ST	TT23	23	24	528	88572.2	57067.5	1.10108	55.7237	334.549	109.96	17500.5	80.8538	737.182	211.471	394.917	116.199	172230	114034	-10.71	2230.09	6507.05	34776.1	675.015	14882	1684.5	-1.53607	-0.0579384	2	2	0	0	0	ST-HSC,MEP,
881	export_H3 ST-HSC SC2_CV0.csv	H3	SC2	CV	ST-HSC	ckit+SCA1-	TT23	23	24	529	98281.6	89491.1	22736	342.993	233.832	66.8397	9957.73	131.216	1362.23	165.984	548.111	103.452	138967	80386.9	89141.7	2989.64	5595.5	8359.34	759.697	4251.08	382.562	1.78177	-0.46429	1	1	0	0	0	SLAM+MEP,
882	export_H3 ST-HSC SC2_Vi0.csv	H3	SC2	Vi	ST-HSC	ckit+SCA1-	TT23	23	24	530	159888	115676	1.6623	136.401	135.418	69.201	21827.1	268.616	1544.1	135.748	359.599	31.8205	166716	79364.7	13.09	4189.12	6926.87	24333.3	800.424	4874.47	127.85	0.657841	1.34449	1	1	0	0	0	MEP,
883	export_H4 ST-HSC SC2_CF1.csv.1	H4	SC2	CF	ST-HSC	ckit+SCA1-	TT23	23	24	531	113661	81076	16207	47.0292	141.113	3677.2	41.6125	149.516	617.986	-32.1568	371.674	55.1966	180357	95000.1	135612	3846.84	6357.07	-28.5659	2035.49	556.375	200.375	-5.01071	3.77679	1	2	0	0	0	GMP,GMP,
884	export_H4 ST-HSC SC2_CF1.csv.2	H4	SC2	CF	ST-HSC	ckit+SCA1-	TT23	23	24	531	134802	79684.7	17344.8	92.2696	90.4887	4772.46	75.1767	-34.6366	709.86	-39.3867	440.759	130.839	180357	95000.1	135612	3846.84	6357.07	-28.5659	2035.49	556.375	200.375	-5.1208	3.82505	1	2	0	0	0	GMP,GMP,
885	export_H4 ST-HSC SC2_CV0.csv	H4	SC2	CV	ST-HSC	MPP	TT23	23	24	532	161018	104019	23231.7	-6994.51	213676	197382	13411.4	67917	22906	180521	204714	81.4204	134797	72749.5	92275	721.687	7300.23	9286.98	740.488	8024.44	437.614	-2.62882	-4.13165	1	1	0	0	0	MPP,
886	export_H4 ST-HSC SC2_Vi1.csv.1	H4	SC2	Vi	ST-HSC	ckit+SCA1-	TT23	23	24	533	100998	64559.7	1.39478	62.9431	121.055	-8.36143	20293.3	67.7045	818.142	111.132	282.706	78.6416	167855	114873	-23.8	5129.28	4983.22	41515.9	-272.789	16222.3	559.111	0.520674	1.90102	1	2	0	0	0	MEP,MEP,
887	export_H4 ST-HSC SC2_Vi1.csv.2	H4	SC2	Vi	ST-HSC	ckit+SCA1-	TT23	23	24	533	97549.1	64641.5	1.36484	67.9433	98.7154	114.537	20125.3	107.466	852.313	129.316	226.638	84.7257	167855	114873	-23.8	5129.28	4983.22	41515.9	-272.789	16222.3	559.111	0.588634	1.68588	1	2	0	0	0	MEP,MEP,
888	export_H5 HSC SC2_CV0.csv	H5	SC2	CV	HSC	HSC_SLAM	TT23	23	24	534	99267.7	58935.2	26945.6	2106.67	260.36	193.81	12437.1	-67.085	118.823	444.077	247.303	42.1747	130626	73838.3	90612.6	378.299	6842.56	7534	14627.6	18362.6	-95.2073	3.2147	-2.38497	1	1	0	0	0	SLAM-HSC,
889	export_H6 HSC SC2_CF1.csv	H6	SC2	CF	HSC	ckit+SCA1-	TT23	23	24	535	128787	82118.2	17753.2	698.919	108.223	122.862	24.5132	21.8962	286.386	5.47561	301.81	96.5738	161323	75316.3	122311	3602.12	6991.24	-33.3237	7059.36	493.184	-43.1242	4.76669	1.14831	1	1	0	0	0	SLAM+MEP,
890	export_H6 HSC SC2_CV1.csv.1	H6	SC2	CV	HSC	ckit+SCA1-	TT23	23	24	536	125336	115478	19720.9	1277.45	155.022	346.346	7331.13	132.363	1718.7	57.9359	483.901	47.2929	207936	102751	128412	7441.64	9118.23	12385.1	15560.4	3299.63	50.9327	4.24728	-0.223345	1	2	0	0	0	SLAM+MEP,SLAM+MEP,
891	export_H6 HSC SC2_CV1.csv.2	H6	SC2	CV	HSC	ckit+SCA1-	TT23	23	24	536	109716	82720.7	20530.8	1499.01	79.8696	-25.1491	7272.04	152.915	1445.79	46.089	380.544	65.1038	207936	102751	128412	7441.64	9118.23	12385.1	15560.4	3299.63	50.9327	5.35986	0.321106	1	2	0	0	0	SLAM+MEP,SLAM+MEP,
892	export_H6 HSC SC2_VC1.csv	H6	SC2	VC	HSC	ckit+SCA1-	TT23	23	24	537	104019	85320	7209.91	1328.69	84.4069	535.142	16017.2	177.216	1112.88	75.9714	209.84	11.4997	176126	83593.9	27799.6	5612.03	5144.58	26922.5	18718.2	461.582	-103.042	4.34369	-0.322679	1	1	0	0	0	GMP,
893	export_H6 HSC SC2_Vi1.csv.1	H6	SC2	Vi	HSC	ckit+SCA1-	TT23	23	24	538	105884	51864.5	1.1564	655.748	87.5732	103.24	17450.4	116.707	349.147	-3.43885	348.851	9.04114	172228	87009.2	-2.38	3559.52	4851.88	36484.6	16332.3	1523.39	-59.1946	4.60939	1.18647	1	2	0	0	0	SLAM+MEP,SLAM+MEP,
894	export_H6 HSC SC2_Vi1.csv.2	H6	SC2	Vi	HSC	ckit+SCA1-	TT23	23	24	538	93558.2	42950.3	1.32839	690.88	73.336	135.712	15466.6	141.257	379.901	28.257	361.971	63.9298	172228	87009.2	-2.38	3559.52	4851.88	36484.6	16332.3	1523.39	-59.1946	4.57027	1.01101	1	2	0	0	0	SLAM+MEP,SLAM+MEP,
895	export_H8 MPP SC3_CF1.csv	H8	SC3	CF	MPP	MPP	TT23	23	24	539	99563	80960.7	17905.1	-58.0164	2227.11	14.5723	59.607	200.289	1738.17	511.818	365.619	131.485	190161	133207	139570	6047.09	2849.62	-23.9129	1075.51	7001.9	4600.81	-2.58706	-1.798	1	1	0	0	0	MPP,
896	export_H8 MPP SC3_CV1.csv.1	H8	SC3	CV	MPP	SLAM+Flt3+	TT23	23	24	540	107036	118658	22708.3	884.698	213523	197391	14152	67520.9	23059.5	180209	204729	34.2122	135208	91735.9	93660.1	1170.23	4629.94	9596.54	570.533	15956.3	700.655	-2.63315	-4.32419	1	2	0	0	0	ST-HSC,SLAM+FLT3+,
897	export_H8 MPP SC3_CV1.csv.2	H8	SC3	CV	MPP	ckit-	TT23	23	24	540	110540	60239.1	28031.4	198.747	120.51	132.392	16007	58.6895	593.054	680.396	108.531	83.1838	135208	91735.9	93660.1	1170.23	4629.94	9596.54	570.533	15956.3	700.655	0.329445	-1.62223	2	2	0	0	0	ST-HSC,SLAM+FLT3+,
898	export_H8 MPP SC3_VC0.csv	H8	SC3	VC	MPP	HSC_ST	TT23	23	24	541	118817	108196	10067.8	380.443	394.416	95.7781	28437.8	224.602	1983.27	411.255	283.581	146.204	144246	89240.5	34693.3	3457.77	5122.2	23666.6	418.688	8449.86	797.883	1.11057	-1.5282	1	1	0	0	0	SLAM-HSC,
899	export_H8 MPP SC3_Vi0.csv	H8	SC3	Vi	MPP	MPP	TT23	23	24	542	162011	140388	6.17252	179.669	1724.67	352.043	31597.9	33.219	1588.59	709.603	235.485	32.0606	185187	100404	7.14	4899.83	3772.31	30498.3	1476.13	19897.1	3674.85	-2.88673	-2.75316	1	1	0	0	0	MPP,
900	export_H9 ST-HSC SC3_Vi0.csv	H9	SC3	Vi	ST-HSC	HSC_ST	TT23	23	24	543	138669	106456	1.88201	36.237	191.939	91.9256	25148.1	43.7995	1170.54	631.118	192.803	79.5835	153942	73072	-24.99	4143.88	7675.38	32490.4	1363.22	5765.37	621.742	-0.334736	-0.806135	1	1	0	0	0	ST-HSC,
901	export_A1 MPP SC2_CF1.csv	A1	SC2	CF	MPP	ckit-	TT21	21	24	544	81588	45297.4	23328.4	116.19	369.732	206.845	49.3059	41.9655	56.5106	1177.38	145.547	88.6009	127031	71986.7	77004.9	1317.35	4081.47	0.15024	-207.439	15661.2	1392.75	-1.41522	-2.47608	1	1	0	0	0	ST-HSC,
902	export_A1 MPP SC2_VC0.csv	A1	SC2	VC	MPP	HSC_ST	TT21	21	24	545	136975	86540.8	9987.02	146.854	215.406	387.284	42823.6	87.6204	109.105	475.983	520.217	80	180239	138489	24171.3	1694.76	5763.67	33795.9	-853.367	6460.85	757.142	-1.27071	-0.733119	1	1	0	0	0	ST-HSC,
903	export_A10 ST-HSC SC3_CF1.csv.1	A10	SC3	CF	ST-HSC	ckit+SCA1-	TT21	21	24	546	99678.6	60171.9	17767.3	268.769	136.552	94.6964	36.4344	75.1771	44.6948	12.5946	315.621	20.1495	163691	110631	130441	616.204	7483.41	-24.6806	2016.1	1203.97	148.619	3.19334	2.68355	1	2	0	0	0	MEP,SLAM+MEP,
904	export_A10 ST-HSC SC3_CF1.csv.2	A10	SC3	CF	ST-HSC	ckit+SCA1-	TT21	21	24	546	128758	75849.4	20093.4	230.033	109.053	148.208	52.4374	144.843	63.8841	3.24732	161.228	102.441	163691	110631	130441	616.204	7483.41	-24.6806	2016.1	1203.97	148.619	3.66818	3.35957	2	2	0	0	0	MEP,SLAM+MEP,
905	export_A10 ST-HSC SC3_CV0.csv	A10	SC3	CV	ST-HSC	HSC_SLAM	TT21	21	24	547	155800	104140	28464.7	1059.86	188.428	303.297	20587	-134.791	404.751	4773.55	428.727	38.2833	145734	101645	118116	-64.2819	5334.95	9065.32	739.47	2456.86	284.535	0.845906	-5.64894	1	1	0	0	0	SLAM-HSC,
906	export_A10 ST-HSC SC3_VC2.csv	A10	SC3	VC	ST-HSC	HSC_ST	TT21	21	24	548	82962.5	60731.9	4246.08	99.9508	116.583	191.182	16010.5	116.472	1127.79	216.103	258.975	54.1217	149892	72736.4	28865.8	2291.18	5168.79	24287.3	-168.542	830.41	110.654	0.104469	0.620391	1	1	0	0	0	ST-HSC,
907	export_A11 HSC SC3_CF1.csv	A11	SC3	CF	HSC	HSC_SLAM	TT21	21	24	549	120269	63586.2	21318.2	1343.39	83.0636	121.21	48.6607	31.2067	71.0667	165.777	474.163	135.318	112269	167666	104417	528.757	10173.1	-58.4234	12760.3	1590.69	354.33	3.73825	-1.22403	1	1	0	0	0	SLAM-HSC,
908	export_A12 HSC SC3_CF1.csv	A12	SC3	CF	HSC	HSC_SLAM	TT21	21	24	550	108272	66526.6	23575	1201.38	106.01	203.738	81.4179	29.0193	28.8576	3196.53	361.891	49.9183	132325	74498.8	77530.9	918.78	4837.39	9.2957	3484.62	17960.4	271.43	1.19057	-5.30754	1	1	0	0	0	SLAM-HSC,
909	export_A2 MPP SC2_CV1.csv	A2	SC2	CV	MPP	MPP	TT21	21	24	551	118771	71962.9	20680.5	155.522	814.631	508.246	16611.7	219.449	928.74	597.102	830.519	118.471	160268	74747.5	84792.3	19001.1	5612.25	9025.89	-1043.26	605.996	1819.4	-2.92314	-2.31126	1	1	0	0	0	MPP,
910	export_A2 MPP SC2_Vi1.csv	A2	SC2	Vi	MPP	MPP	TT21	21	24	552	119689	89540.2	-0.132107	44.2857	2539.17	393.965	36741.7	202.076	247.857	118.349	615.582	53.849	185079	168245	17.85	3487.34	4315.39	41732.4	-265.279	3249.16	2822.29	-3.43729	-0.687034	1	1	0	0	0	MPP,
911	export_A3 ST-HSC SC2_CF1.csv	A3	SC2	CF	ST-HSC	ckit-	TT21	21	24	553	80889	46623.6	23618.5	378.737	253.354	221.557	35.6949	-155.532	28.1203	5168.32	136.021	137.408	138630	69938.7	89827.2	1088.09	2498.1	11.3695	2097.51	26044	-31.8006	-0.509114	-4.46226	1	1	0	0	0	SLAM-HSC,
912	export_A4 ST-HSC SC2_Vi1.csv	A4	SC2	Vi	ST-HSC	HSC_ST	TT21	21	24	554	120319	60348.5	1.16817	192.559	215.112	55.901	53003.3	168.718	107.975	451.919	326.203	204.875	140267	99720.8	9.52	232.594	4977.21	44936.5	201.28	10598.9	180.913	0.604732	-0.869627	1	2	0	0	0	SLAM-HSC,ST-HSC,
913	export_A4 ST-HSC SC2_Vi3.csv	A4	SC2	Vi	ST-HSC	HSC_SLAM	TT21	21	24	554	93631.7	58043.9	-2.07369	8197.38	277.382	207623	13718.4	126540	-4539.38	32087.2	6340.11	123.167	140267	99720.8	9.52	232.594	4977.21	44936.5	201.28	10598.9	180.913	-5.34752	-5.82782	2	2	0	0	0	SLAM-HSC,ST-HSC,
914	export_A5 HSC SC2_CF1.csv	A5	SC2	CF	HSC	HSC_SLAM	TT21	21	24	555	112526	67271.8	22817.6	6074.02	80.8154	229.486	77.489	226.628	-11.7511	3633.9	504.044	22.69	152572	90574.5	104106	833.466	6070.34	-95.7392	48669.9	1305.39	-214.878	1.53785	-5.78295	1	1	0	0	0	SLAM-HSC,
915	export_A5 HSC SC2_CV1.csv	A5	SC2	CV	HSC	HSC_SLAM	TT21	21	24	556	105531	60346.8	18691.8	1545.41	153.974	211.941	12420.6	-0.020999	57.3798	4592.88	181.84	207.221	163497	88853.7	77402.4	599.327	3091.36	7823.96	22688.7	24324.6	-187.554	1.14951	-5.68053	1	1	0	0	0	SLAM-HSC,
916	export_A5 HSC SC2_Vi1.csv	A5	SC2	Vi	HSC	HSC_SLAM	TT21	21	24	557	149053	97945.6	2.25717	1060.06	97.7456	140.158	44891.1	110.799	62.3289	1014.99	276.285	161.189	148394	64188.6	22.61	194.049	4661.42	40504.5	8671.28	1497.76	-31.5684	1.68308	-3.48156	1	1	0	0	0	SLAM-HSC,
917	export_A6 HSC SC2_CF2.csv	A6	SC2	CF	HSC	ckit+SCA1-	TT21	21	24	558	115260	51398.3	17165.9	843.084	134.751	148.605	29.7814	148.809	206.319	22.3048	282.831	194.586	161345	74079.9	133623	5527.34	5415.01	-30.2056	10566.7	1200.18	-24.7129	4.95748	1.15207	1	1	0	0	0	SLAM+MEP,
918	export_A6 HSC SC2_Vi2.csv	A6	SC2	Vi	HSC	ckit+SCA1-	TT21	21	24	559	136650	53965.8	0.915878	1306.08	151.355	87.2261	23632.5	150.337	29.5231	19.5366	406.4	193.926	176383	91007.6	0	-151.762	5725.63	44963.1	22188.7	2737.92	92.5897	5.23665	0.514693	1	1	0	0	0	SLAM+MEP,
919	export_A7 MPP SC3_VC3.csv.1	A7	SC3	VC	MPP	ckit-	TT21	21	24	560	151891	99901.1	2715.44	72.3467	172.48	15938.7	8096.16	430.056	852.424	-20.1892	111.119	55.5168	213790	127875	37238.7	1576.66	2725.95	23141.1	-69.7017	517.595	3229.38	-6.31378	4.01383	1	4	0	0	0	MyP,MyP,
920	export_A7 MPP SC3_VC3.csv.2	A7	SC3	VC	MPP	ckit-	TT21	21	24	560	108550	85630.3	2383.6	270.385	122.326	14589	7305.74	-231.406	728.438	-110.722	71.9943	148.539	213790	127875	37238.7	1576.66	2725.95	23141.1	-69.7017	517.595	3229.38	-6.75573	4.10568	1	4	0	0	0	GMP,MyP,MyP,
921	export_A7 MPP SC3_VC3.csv.3	A7	SC3	VC	MPP	ckit+SCA1-	TT21	21	24	560	114895	100576	2625.42	169.434	193.441	15625.5	7349.08	951.929	1136.23	-138.73	152.753	169.347	213790	127875	37238.7	1576.66	2725.95	23141.1	-69.7017	517.595	3229.38	-6.80725	4.15757	2	4	0	0	0	MyP,GMP,MyP,MyP,
922	export_A7 MPP SC3_VC3.csv.4	A7	SC3	VC	MPP	ckit-	TT21	21	24	560	142520	125161	2871.18	108.258	171.905	14539.3	8353.03	571.113	899.254	-81.2771	128.886	174.598	213790	127875	37238.7	1576.66	2725.95	23141.1	-69.7017	517.595	3229.38	-6.68302	4.12046	3	4	0	0	0	MyP,GMP,MyP,MyP,
923	export_A7 MPP SC3_Vi2.csv	A7	SC3	Vi	MPP	MPP	TT21	21	24	561	91401	47615	5.90463	236.292	1786.13	194.201	21859.8	125.122	1359.81	582.681	235.698	153.073	191954	152534	-8.33	4221.46	3594.23	36333.7	1646.69	5817.48	1737.96	-2.79515	-2.86815	1	1	0	0	0	MPP,
924	export_A8 MPP SC3_Vi1.csv	A8	SC3	Vi	MPP	HSC_SLAM	TT21	21	24	562	157855	112387	41.396	29290.2	182.142	208106	52234.2	108466	-4181.45	117990	16297.2	43.6527	134923	84847	-15.47	4031.75	4973.36	36551.1	806.737	1446.41	629.277	-5.32133	-5.80369	1	3	0	0	0	MPP,SLAM-HSC,
925	export_A8 MPP SC3_Vi2.csv	A8	SC3	Vi	MPP	MPP	TT21	21	24	562	107258	64737.9	2.12376	129.68	602.366	201.217	21196.9	252.261	1810.95	132.252	423.752	63.1111	134923	84847	-15.47	4031.75	4973.36	36551.1	806.737	1446.41	629.277	-2.88066	-0.199313	2	3	0	0	0	SLAM-HSC,MPP,SLAM-HSC,
926	export_A8 MPP SC3_Vi3.csv	A8	SC3	Vi	MPP	SLAM+Flt3+	TT21	21	24	562	88033.6	44901.8	-7.35361	8326.9	312.066	207575	8948.85	131666	-4652.4	7153.58	3381.01	9.60272	134923	84847	-15.47	4031.75	4973.36	36551.1	806.737	1446.41	629.277	-5.47168	-5.95117	3	3	0	0	0	SLAM-HSC,MPP,SLAM-HSC,
927	export_A9 ST-HSC SC3_CV1.csv	A9	SC3	CV	ST-HSC	HSC_SLAM	TT21	21	24	563	127132	64090.8	21153.2	380.246	78.4702	439.274	15886.6	192.121	368.321	279.83	349.13	150.36	135499	83367.8	67362.3	520.189	6767.68	8100.51	831.454	2113.71	62.6877	2.8077	0.81204	1	1	0	0	0	SLAM-HSC,
928	export_B1 MPP SC2_Vi1.csv	B1	SC2	Vi	MPP	MPP	TT21	21	24	564	94918.1	82848.4	1.81847	247.433	367.971	332.935	38155.5	73.3028	500.047	134.42	392.455	124.389	148711	105113	73.78	5253.25	9262.26	37792	-232.049	720.752	786.355	-2.28696	0.461138	1	1	0	0	0	ST-HSC,
929	export_B10 ST-HSC SC3_CV1.csv	B10	SC3	CV	ST-HSC	HSC_ST	TT21	21	24	565	141493	94794.2	25516.5	141.035	235.27	697.571	19704.4	150.183	618.516	717.978	279.392	55.1165	125811	85714.5	80801	1955.32	4203.93	9713.89	-483.628	2688.93	325.638	-1.215	-1.62006	1	1	0	0	0	ST-HSC,
930	export_B10 ST-HSC SC3_Vi2.csv.1	B10	SC3	Vi	ST-HSC	HSC_ST	TT21	21	24	566	99958	70841.8	1.69595	97.0054	116.482	96.7044	24965.5	118.29	872.153	107.408	398.177	80.5799	196206	106225	-8.33	988.177	6569.73	41859.9	-48.6149	1680.16	243.018	0.650718	1.67055	1	2	0	0	0	SLAM-HSC,ST-HSC,
931	export_B10 ST-HSC SC3_Vi2.csv.2	B10	SC3	Vi	ST-HSC	HSC_SLAM	TT21	21	24	566	107457	55297.8	1.49832	407.1	203.791	144.572	27946.3	150.142	1059.88	285.75	276.518	98.3544	196206	106225	-8.33	988.177	6569.73	41859.9	-48.6149	1680.16	243.018	2.30094	-1.06932	2	2	0	0	0	SLAM-HSC,ST-HSC,
932	export_B11 HSC SC3_CF1.csv	B11	SC3	CF	HSC	ckit-	TT21	21	24	567	99775.3	68414.7	27820.3	6390.59	150.596	235.431	76.418	147.205	-24.1207	3790.08	83.0573	31.9166	158319	82129	108434	-619.573	1883.56	-83.9796	51266.6	23091.2	-220.112	1.55845	-5.63244	1	1	0	0	0	ckit-,
933	export_B11 HSC SC3_VC2.csv	B11	SC3	VC	HSC	ckit-	TT21	21	24	568	83346.6	74108.4	4202.58	359.517	109.701	82.6855	12843.1	155.488	189.368	23.9586	115.123	99.7964	215483	92683.2	45110.5	2239.76	5608.58	25202.7	8039.68	845.707	-41.6941	4.24772	3.13919	1	1	0	0	0	ckit-,
934	export_B11 HSC SC3_Vi2.csv	B11	SC3	Vi	HSC	HSC_SLAM	TT21	21	24	569	120377	73614.7	1.17324	672.577	103.029	144.12	22705.9	10.149	153.457	1596.52	219.226	201.326	190610	117185	11.9	1782.51	9352.22	40002	5030.17	8022.95	131.193	1.23584	-3.74396	1	1	0	0	0	SLAM-HSC,
935	export_B12 HSC SC3_CV1.csv.1	B12	SC3	CV	HSC	ckit-	TT21	21	24	570	167942	85775.4	15646.8	2286.68	99.7035	151.684	11159.6	236.005	521.128	90.466	123.733	4.99688	169744	93600.6	112376	15523.8	3224.19	11801.4	7462.63	769.137	44.8546	5.05031	-0.334429	1	2	0	0	0	SLAM+MEP,ckit-,
936	export_B12 HSC SC3_CV1.csv.2	B12	SC3	CV	HSC	ckit+SCA1-	TT21	21	24	570	110775	77163.5	14927.7	2079.41	118.383	283.041	10558.5	307.912	513.145	87.5748	257.465	218.976	169744	93600.6	112376	15523.8	3224.19	11801.4	7462.63	769.137	44.8546	4.43155	-0.418278	2	2	0	0	0	SLAM+MEP,ckit-,
937	export_B2 MPP SC2_CV1.csv	B2	SC2	CV	MPP	MPP	TT21	21	24	571	107017	83443.7	22420.3	110.209	988.147	407.526	19692.8	73.2867	603.426	623.183	538.542	124.261	176569	127901	95840.2	1883.95	5820.54	12480.8	-436.796	13026.2	835.178	-2.98677	-2.22533	1	1	0	0	0	MPP,
938	export_B2 MPP SC2_Vi1.csv	B2	SC2	Vi	MPP	MPP	TT21	21	24	572	141047	86826.4	0.917909	95.9177	312.39	330.1	41621.3	139.612	197.493	1003.9	245.9	134.148	153993	98078.6	17.85	1842.6	5151.08	37536.1	687.748	4644.34	656.785	-1.3686	-2.3212	1	1	0	0	0	ST-HSC,
939	export_B3 ST-HSC SC2_CF2.csv.1	B3	SC2	CF	ST-HSC	MPP	TT21	21	24	573	118193	46071.1	14972.4	60.6128	357.688	204.966	36.8025	45.0859	95.4479	431.269	289.895	76.652	171218	106208	124672	2672.09	4867.8	-27.2915	307.05	16567.3	304.651	-1.3711	-0.625688	1	2	0	0	0	ST-HSC,ST-HSC,
940	export_B3 ST-HSC SC2_CF2.csv.2	B3	SC2	CF	ST-HSC	MPP	TT21	21	24	573	83921.3	55139.7	14370.1	29.8127	368.895	281.957	36.3961	41.0471	116.845	415.236	319.338	96.3391	171218	106208	124672	2672.09	4867.8	-27.2915	307.05	16567.3	304.651	-1.42699	-0.747126	1	2	0	0	0	ST-HSC,ST-HSC,
941	export_B3 ST-HSC SC2_CV0.csv	B3	SC2	CV	ST-HSC	ckit+SCA1-	TT21	21	24	574	152061	96061	27349	98.9782	189.905	444.577	21237.3	3.91362	614.205	43.7192	651.316	114.567	132119	104342	71530.9	1392.12	7084.93	10928.5	305.127	847.136	555.087	-2.32458	2.90126	1	1	0	0	0	MEP,
942	export_B3 ST-HSC SC2_Vi2.csv.1	B3	SC2	Vi	ST-HSC	ckit+SCA1-	TT21	21	24	575	159532	80566.9	0.970924	915.312	78.4815	230.026	28411.4	185.824	459.091	54.3198	343.456	37.817	178377	94323	8.33	3910.73	4283.75	45921	687.491	687.388	24.6741	4.49399	0.12375	1	2	0	0	0	SLAM+MEP,SLAM+MEP,
943	export_B3 ST-HSC SC2_Vi2.csv.2	B3	SC2	Vi	ST-HSC	ckit+SCA1-	TT21	21	24	575	100396	75156	2.40936	255.319	101.963	276.708	25018.7	136.788	799.168	14.636	302.193	123.662	178377	94323	8.33	3910.73	4283.75	45921	687.491	687.388	24.6741	3.25177	2.05247	1	2	0	0	0	SLAM+MEP,SLAM+MEP,
944	export_B4 ST-HSC SC2_CV1.csv	B4	SC2	CV	ST-HSC	ckit+SCA1-	TT21	21	24	576	75349.1	44010.6	18945.5	127.857	67.664	205.815	12809.5	50.0971	100.561	44.2599	343.529	195.623	162630	108668	117739	418.655	8334.3	11272.9	-716.573	3370.19	352.907	-0.16659	3.45365	1	1	0	0	0	MEP,
945	export_B4 ST-HSC SC2_VC1.csv	B4	SC2	VC	ST-HSC	ckit+SCA1-	TT21	21	24	577	91224.5	64824	7870.35	90.3109	120.52	294.067	27372.1	104.963	648.245	86.6706	272.186	111.929	146153	93366.2	27372.4	3421.15	5080.47	24641.5	-434.215	1182.12	164.155	-1.13583	2.43473	1	1	0	0	0	MEP,
946	export_B4 ST-HSC SC2_Vi2.csv.1	B4	SC2	Vi	ST-HSC	HSC_ST	TT21	21	24	578	114070	77362.7	1.32661	45.4651	156.447	51.398	26223.5	171.147	475.075	191.935	277.312	185.707	129807	137657	14.28	5899.39	7628.1	45642.4	871.041	4151.35	377.61	0.190902	1.03138	1	2	0	0	0	ST-HSC,ST-HSC,
947	export_B4 ST-HSC SC2_Vi2.csv.2	B4	SC2	Vi	ST-HSC	MPP	TT21	21	24	578	106033	77444.8	3.33312	41.5446	318.93	140.587	28591.6	65.4326	323.669	211.251	436.574	192.496	129807	137657	14.28	5899.39	7628.1	45642.4	871.041	4151.35	377.61	-1.6476	-0.0114713	1	2	0	0	0	ST-HSC,ST-HSC,
948	export_B5 HSC SC2_CV1.csv	B5	SC2	CV	HSC	HSC_SLAM	TT21	21	24	579	91731.8	82820.9	22153.2	4815.1	98.3521	185.399	11748.3	228.389	-6.79341	358.923	423.332	93.7268	111733	68439.3	96823.2	893.12	5587.98	6618.56	32551.1	8216.31	-55.7237	3.45472	-2.35949	1	1	0	0	0	SLAM-HSC,
949	export_B5 HSC SC2_VC1.csv	B5	SC2	VC	HSC	HSC_SLAM	TT21	21	24	580	122479	78600.1	7877.52	1182.29	78.2587	321.599	35053.5	51.3417	53.6947	1375.47	573.59	2.34442	161448	97142.1	17044.4	633.772	6255.8	26561.6	10027	4440.98	140.747	1.38033	-4.94784	1	1	0	0	0	SLAM-HSC,
950	export_B6 HSC SC2_CV1.csv	B6	SC2	CV	HSC	SLAM+Flt3+	TT21	21	24	581	99048.3	64889.4	23344	6001.73	364.575	417.317	12469.2	97.5932	3.02808	3406.09	448.154	111.987	164080	85605	62926	-510.385	3711.82	7014.9	58512.7	48683.1	-55.3091	1.38549	-5.7716	1	1	0	0	0	SLAM-HSC,
951	export_B6 HSC SC2_VC2.csv	B6	SC2	VC	HSC	HSC_SLAM	TT21	21	24	582	91923.7	63554.8	5222.07	3347.78	92.0784	222.922	22538.2	204.797	16.9545	577.405	273.547	188.245	175763	100872	28460	1444.69	6444.34	32376.4	23753.7	3555.29	-77.0649	3.24346	-2.55254	1	1	0	0	0	SLAM-HSC,
952	export_B7 MPP SC3_CF2.csv	B7	SC3	CF	MPP	MPP	TT21	21	24	583	157232	92250.6	17825.5	230.892	1155.49	351.553	137.17	362.312	2788.29	511.672	286.336	54.9907	145107	75406.7	77532.1	3129.18	3914.9	-8.67525	-881.677	3336.33	1874.44	-2.78533	-2.87256	1	1	0	0	0	MPP,
953	export_B7 MPP SC3_VC1.csv	B7	SC3	VC	MPP	SLAM+Flt3+	TT21	21	24	584	168028	146568	7414.63	635.274	717.848	1081.74	28563	256.503	1903.14	1124.92	286.348	58.2302	152518	65553.5	24364.1	1442.24	2727.84	21482.4	377.042	4028.97	998.384	-2.20944	-4.13215	1	1	0	0	0	SLAM+FLT3+,
954	export_B7 MPP SC3_Vi1.csv	B7	SC3	Vi	MPP	MPP	TT21	21	24	585	142135	94870.8	1.65085	267.449	2208.35	339.038	50502.4	185.384	1070.03	1022.05	369.4	68.33	155194	100860	1.19	1678.89	4416.54	44502.4	146.587	9550.95	1814.35	-2.87004	-2.94038	1	1	0	0	0	SLAM+FLT3+,
955	export_B8 MPP SC3_CV1.csv	B8	SC3	CV	MPP	MPP	TT21	21	24	586	150408	101835	18928.7	261.873	807.734	489.296	13853.7	151.698	1548.52	562.222	254.098	63.5357	149913	141818	99459	2078.27	6512.4	15021.8	-246.409	9560.25	2617.75	-2.59077	-3.03425	1	1	0	0	0	SLAM+FLT3+,
956	export_B8 MPP SC3_Vi1.csv.1	B8	SC3	Vi	MPP	SLAM+Flt3+	TT21	21	24	587	113144	76768.5	3.87066	669.856	426.499	345.099	30301.5	42.8969	435.948	1933.84	267.045	69.1669	188608	119941	0	2987.11	6642.57	57049.7	243.682	11636.5	1956.43	-1.34847	-4.23015	1	2	0	0	0	MPP,SLAM-HSC,
957	export_B8 MPP SC3_Vi1.csv.2	B8	SC3	Vi	MPP	MPP	TT21	21	24	587	132470	65881.5	1.08924	166.955	636.39	511.336	35602.2	241.235	576.31	1198.13	221.28	71.5025	188608	119941	0	2987.11	6642.57	57049.7	243.682	11636.5	1956.43	-2.13641	-3.69374	2	2	0	0	0	MPP,SLAM-HSC,
958	export_B9 ST-HSC SC3_CV0.csv	B9	SC3	CV	ST-HSC	HSC_ST	TT21	21	24	588	167011	78339.7	37755.7	158.237	232.289	339.4	25530.6	472.237	2400.84	678.559	262.741	147.593	145813	85774	97927.5	14583.6	7179.44	10374.4	135.752	1853.94	290.168	-1.07034	-1.51917	1	1	0	0	0	ST-HSC,
959	export_B9 ST-HSC SC3_VC2.csv	B9	SC3	VC	ST-HSC	HSC_ST	TT21	21	24	589	149129	92390.9	5319.73	96.4939	107.165	297.373	22135.8	309.782	2481.37	116.255	282.534	50.1973	206633	118854	27285.5	4993.06	13113.7	36089.4	786.785	2137.88	119.118	-1.15539	2.3547	1	1	0	0	0	ST-HSC,
960	export_B9 ST-HSC SC3_Vi0.csv	B9	SC3	Vi	ST-HSC	ckit+SCA1-	TT21	21	24	590	77481.5	52055.4	4.19002	64.7387	85.1725	153.261	65205	180.167	459.736	86.4263	166.684	30.5324	111034	91839.4	22.61	998.585	3621.85	60125.3	758.836	2278.3	35.6878	0.763148	1.88003	1	1	0	0	0	MEP,
961	export_C1 MPP SC2_VC1.csv	C1	SC2	VC	MPP	ckit+SCA1-	TT21	21	24	591	140491	115389	8326.67	161.924	801.776	325.551	25852.7	187.347	1125.22	24.4704	869.96	163.372	165860	82448	29917.8	575.735	2660.89	19568.7	668.503	1434.61	685.501	-3.08583	0.527136	1	1	0	0	0	MEP,
962	export_C1 MPP SC2_Vi1.csv	C1	SC2	Vi	MPP	MPP	TT21	21	24	592	115189	56362.2	25.2042	46.9768	817.239	297.08	31898.7	-8.38231	364.843	481.845	628.639	198.58	180285	92538	51.17	2323.2	4032.77	34580	1180.2	3017.41	1783.3	-2.95504	-1.54685	1	1	0	0	0	MPP,
963	export_C10 ST-HSC SC3_CF1.csv	C10	SC3	CF	ST-HSC	MPP	TT21	21	24	593	110245	61635.7	33045.5	-79.379	889.28	195.725	80.3744	-12.7428	140.495	3704.42	220.697	99.0766	137014	70878.8	103688	359.912	2501	-24.0377	-6.97549	27742.2	583.266	-1.67411	-2.53669	1	1	0	0	0	MPP,
964	export_C10 ST-HSC SC3_CV1.csv	C10	SC3	CV	ST-HSC	HSC_ST	TT21	21	24	594	141268	86246	19172.1	339.556	205.399	212.222	12474.8	-83.3872	163.691	4141.15	319.641	178.761	150531	70097	75804.2	72.9913	4784.2	6841.16	1282.93	15440.3	72.7916	-0.247028	-4.34642	1	1	0	0	0	SLAM-HSC,
965	export_C10 ST-HSC SC3_VC1.csv	C10	SC3	VC	ST-HSC	HSC_ST	TT21	21	24	595	138185	76926.8	7097.59	76.5737	279.27	2542.98	30341.7	254.8	1562.06	833.919	615.242	9.59075	151727	83728.4	20400.2	18324.5	5405.95	23989.7	463.496	2191.56	568.112	-1.41008	-1.51821	1	1	0	0	0	ST-HSC,
966	export_C11 HSC SC3_VC1.csv	C11	SC3	VC	HSC	HSC_SLAM	TT21	21	24	596	108501	71393.2	7690.37	878.882	158.476	173.138	29034.1	-39.6729	27.4523	3915.88	210.195	135.229	121891	62935.5	20301.4	355.621	4008.98	20508	4989	3830.61	-167.635	0.579211	-5.04041	1	1	0	0	0	SLAM-HSC,
967	export_C11 HSC SC3_Vi2.csv	C11	SC3	Vi	HSC	HSC_SLAM	TT21	21	24	597	91458.4	58845.6	-7.7479	14545.3	165.874	207730	23393.5	124531	-4561.08	41262.7	7300.6	72.4152	138568	107484	-17.85	332.792	5435.02	38868	12476.7	2486.07	-4.47458	-5.37968	-5.85872	1	1	0	0	0	SLAM-HSC,
968	export_C12 HSC SC3_CF2.csv.1	C12	SC3	CF	HSC	ckit+SCA1-	TT21	21	24	598	138316	84667.5	12205.8	450.056	76.5566	241.655	68.752	185.674	1094.31	37.1203	400.597	56.3308	154807	79085	86849.8	2878.79	5698.79	-21.151	5144.78	465.03	12.2793	3.6646	1.23065	1	2	0	0	0	SLAM+MEP,SLAM+MEP,
969	export_C12 HSC SC3_CF2.csv.2	C12	SC3	CF	HSC	ckit+SCA1-	TT21	21	24	598	128569	83340.6	13419.2	486.475	141.268	131.816	73.8114	299.207	1241.42	43.3425	337.983	87.877	154807	79085	86849.8	2878.79	5698.79	-21.151	5144.78	465.03	12.2793	3.95135	1.30491	1	2	0	0	0	SLAM+MEP,SLAM+MEP,
970	export_C12 HSC SC3_VC1.csv	C12	SC3	VC	HSC	ckit-	TT21	21	24	599	142792	67523.9	5987.24	1415.72	69.3079	150.12	24409.8	113.945	30.7514	345.223	147.961	11.4184	166098	98409.4	26770.2	286.57	5062.44	36144.3	7796.92	1368.05	238.853	3.4932	-1.55689	1	1	0	0	0	SLAM-HSC,
971	export_C12 HSC SC3_Vi2.csv	C12	SC3	Vi	HSC	ckit+SCA1-	TT21	21	24	600	154525	98066.8	1.31557	1148.26	28.234	151	24101.1	70.3456	110.109	2.70925	233.858	202.754	165294	96525.7	-4.76	2297.77	6930.91	41537.1	13781.4	1071.53	-147.855	5.42841	0.999224	1	1	0	0	0	SLAM+MEP,
972	export_C2 MPP SC2_CF1.csv	C2	SC2	CF	MPP	MPP	TT21	21	24	601	132684	87030.5	29044.4	160.121	527.188	303.153	81.1712	63.9779	235.848	769.741	428.986	51.7704	171742	94383.7	113626	1991.42	7080.21	4.164	-198.67	16681.8	665.404	-2.54946	-2.76126	1	1	0	0	0	MPP,
973	export_C2 MPP SC2_VC1.csv	C2	SC2	VC	MPP	MPP	TT21	21	24	602	89299.8	36442.6	7288.64	17.7862	389.231	821.619	29081.6	65.2398	521.8	255.1	745.708	195.023	154866	107085	18903.2	3494.58	5109.77	29550	883.528	1001.77	1348.41	-3.74727	0.481634	1	1	0	0	0	ST-HSC,
974	export_C2 MPP SC2_Vi2.csv	C2	SC2	Vi	MPP	ckit+SCA1-	TT21	21	24	603	76653.4	42411.2	0.85929	43.5233	1491.39	129.295	19891.1	89.6191	333.419	46.9147	154.142	116.941	197312	113520	-23.8	2005.8	4733.39	43354.2	33.23	923.346	1688.13	-3.00431	-0.194556	1	2	0	0	0	SLAM-HSC,MEP,
975	export_C2 MPP SC2_Vi3.csv	C2	SC2	Vi	MPP	SLAM+Flt3+	TT21	21	24	603	76261.2	65355.1	3.77295	5595.63	322.817	207512	8717.15	131807	-4640.75	6702.26	3513.67	78.3492	197312	113520	-23.8	2005.8	4733.39	43354.2	33.23	923.346	1688.13	-5.46109	-5.9378	2	2	0	0	0	SLAM-HSC,MEP,
976	export_C3 ST-HSC SC2_CV1.csv	C3	SC2	CV	ST-HSC	HSC_ST	TT21	21	24	604	116272	62002.9	20117.8	51.8507	140.821	580.617	13601.1	69.9648	434.147	158.68	412.109	191.776	141674	57801.9	84030.7	4260.98	6011.48	6824.06	1479.63	1190.37	77.5559	-2.39138	1.84239	1	1	0	0	0	ST-HSC,
977	export_C3 ST-HSC SC2_VC2.csv	C3	SC2	VC	ST-HSC	ckit+SCA1-	TT21	21	24	605	132019	61356.8	4280.89	199.891	103.75	80.035	18991.6	113.182	53.1167	8.71085	243.369	31.6655	157529	77263.1	23695.3	169.1	7406.42	24757.7	489.97	2589.12	178.127	2.78932	3.20652	1	1	0	0	0	MEP,
978	export_C3 ST-HSC SC2_Vi0.csv	C3	SC2	Vi	ST-HSC	SLAM+Flt3+	TT21	21	24	606	131386	80338.4	29.0734	11045.4	318.097	207829	64585.6	93376	-3750.34	192866	26709.7	148.567	107452	218157	2.38	2065.88	2317.93	46112.6	1032.98	928.852	179.574	-5.26671	-5.75548	1	1	0	0	0	SLAM-HSC,
979	export_C4 ST-HSC SC2_CF1.csv	C4	SC2	CF	ST-HSC	HSC_SLAM	TT21	21	24	607	150322	101688	31563	355.873	230.085	420.154	92.8772	-87.9243	245.273	2165.43	433.211	203.88	146630	78428.1	99601.8	178.013	6346.75	-11.3909	-118.356	9374.12	170.39	-1.13216	-4.09245	1	1	0	0	0	SLAM-HSC,
980	export_C4 ST-HSC SC2_CV1.csv	C4	SC2	CV	ST-HSC	HSC_SLAM	TT21	21	24	608	131781	95537.2	24759.5	1292.54	160.567	280.987	15049.3	40.8323	58.2878	2891.88	424.055	112.928	167815	103144	81544.8	-581.562	8160.35	8907.87	1903.84	5972.43	47.5774	0.933361	-5.41153	1	1	0	0	0	SLAM-HSC,
981	export_C4 ST-HSC SC2_VC1.csv	C4	SC2	VC	ST-HSC	MPP	TT21	21	24	609	125468	81672.3	9724.4	113.202	860.996	206.122	29469.7	79.4417	189.262	956.793	321.601	53.8891	142939	70138.6	33846	502.882	4445.95	21386.4	-22.5457	21027.4	275.156	-2.43683	-2.49486	1	1	0	0	0	MPP,
982	export_C5 HSC SC2_CF2.csv	C5	SC2	CF	HSC	HSC_SLAM	TT21	21	24	610	120466	82855	16540.5	726.063	87.0896	147.604	63.0581	119.626	254.258	316.493	420.208	6.28392	177900	93837.5	113687	4256.43	7061.5	-36.5869	9200.42	13416.8	-25.8757	2.86487	-1.37499	1	1	0	0	0	SLAM-HSC,
983	export_C5 HSC SC2_CV1.csv	C5	SC2	CV	HSC	HSC_SLAM	TT21	21	24	611	94451.6	95208.9	22908.4	1902.7	230.411	233.275	13732.1	51.7399	46.1809	2382.48	332.516	151.063	164688	79906.1	83947.4	1189.09	3930.12	8558.35	17631.4	27512.4	46.5731	0.967971	-5.43135	1	1	0	0	0	SLAM-HSC,
984	export_C5 HSC SC2_VC1.csv	C5	SC2	VC	HSC	HSC_SLAM	TT21	21	24	612	100356	86233.2	7717.3	979.866	89.233	110.262	33178.1	90.8367	178.645	149.952	241.645	135.403	120415	56678.5	15740.1	3212	7004.34	24844.5	6832.11	1019.68	76.6443	3.57009	-0.863263	1	1	0	0	0	SLAM-HSC,
985	export_C6 HSC SC2_CF1.csv	C6	SC2	CF	HSC	HSC_SLAM	TT21	21	24	613	127773	83525.5	24756.1	665.558	128.167	92.2293	59.4446	134.81	56.5125	1197.88	273.545	185.307	154516	85519.4	90601.8	1142.22	5778.99	-16.7046	5653.89	12953.4	-86.1674	1.33859	-3.50397	1	1	0	0	0	SLAM-HSC,
986	export_C6 HSC SC2_VC1.csv	C6	SC2	VC	HSC	HSC_SLAM	TT21	21	24	614	119153	79528	8409.11	703.184	163.783	61.4475	33893	156.441	63.9658	314.671	265.067	223.521	147414	74814.1	22631.4	885.324	9671.61	22391.2	4683.99	3881.27	-26.8594	2.96444	-0.980683	1	1	0	0	0	SLAM-HSC,
987	export_C6 HSC SC2_Vi2.csv	C6	SC2	Vi	HSC	ckit+SCA1-	TT21	21	24	615	92134.7	54879.8	1.42822	183.952	69.6337	63.846	22212.5	77.5821	45.9412	66.2379	308.314	84.9992	149296	93244.8	10.71	2111.67	7767.62	41904.6	3589.1	2692	4.12812	1.76372	2.86514	1	2	0	0	0	SLAM-HSC,MEP,
988	export_C6 HSC SC2_Vi4.csv	C6	SC2	Vi	HSC	SLAM+Flt3+	TT21	21	24	615	72127.6	56679.8	-5.05129	4662.62	354.015	208545	6234.58	113518	-3939.62	1464.83	2652.11	113.054	149296	93244.8	10.71	2111.67	7767.62	41904.6	3589.1	2692	4.12812	-5.48142	-5.95072	2	2	0	0	0	SLAM-HSC,MEP,
989	export_C7 MPP SC3_CF1.csv.1	C7	SC3	CF	MPP	HSC_ST	TT21	21	24	616	105550	57540	21605	108.11	69.2475	81.3322	33.1411	24.8666	51.858	749.136	206.978	79.6711	132839	126063	83716.5	521.784	5749.47	-10.0706	1079.58	11698.2	691.931	0.00398541	-0.838629	1	2	0	0	0	ST-HSC,ST-HSC,
990	export_C7 MPP SC3_CF1.csv.2	C7	SC3	CF	MPP	HSC_ST	TT21	21	24	616	101021	68530.8	22632.4	129.863	176.724	241.695	24.6687	-10.4711	49.0962	753.59	276.608	146.414	132839	126063	83716.5	521.784	5749.47	-10.0706	1079.58	11698.2	691.931	-0.592228	-1.47569	1	2	0	0	0	ST-HSC,ST-HSC,
991	export_C8 MPP SC3_CF2.csv.1	C8	SC3	CF	MPP	MPP	TT21	21	24	617	114788	57291.5	11955.5	23.3024	1251.78	181.761	78.2192	155.351	613.725	718.812	150.973	34.2134	137585	113601	84975.5	6976.3	2473.08	-14.1161	454.142	7265.9	3601.49	-2.52787	-2.18882	1	2	0	0	0	MPP,MPP,
992	export_C8 MPP SC3_CF2.csv.2	C8	SC3	CF	MPP	ckit-	TT21	21	24	617	107657	65674	11819.3	79.0268	1419.11	107.595	56.7887	114.087	512.649	648.603	147.69	46.8639	137585	113601	84975.5	6976.3	2473.08	-14.1161	454.142	7265.9	3601.49	-2.54957	-2.15053	1	2	0	0	0	MPP,MPP,
993	export_C8 MPP SC3_CV1.csv	C8	SC3	CV	MPP	MPP	TT21	21	24	618	105503	83522.6	25717.6	125.991	1934.57	548.125	18478.2	193.672	1317.06	651.57	316.343	46.912	168651	104207	99094.9	7061.72	3303.43	10799.8	-344.954	1189.85	3135.7	-3.00422	-2.63922	1	1	0	0	0	MPP,
994	export_C8 MPP SC3_VC1.csv	C8	SC3	VC	MPP	MPP	TT21	21	24	619	159559	114283	10350	167.265	2212.06	588.002	31824.2	430.419	2162.05	151.987	686.013	202.564	160325	96119.9	41206.1	782.26	4230.14	22819.3	230.052	1100.45	1483.78	-3.67838	-0.539536	1	1	0	0	0	MPP,
995	export_C8 MPP SC3_Vi2.csv	C8	SC3	Vi	MPP	MPP	TT21	21	24	620	109027	79632.2	5.0545	71.2216	841.336	192.961	30016.4	149.871	1377.07	948.654	239.106	82.26	181341	124294	-5.95	2480.21	6842.25	47389.1	877.732	7107.9	1671.25	-2.42255	-2.2061	1	1	0	0	0	MPP,
996	export_C9 ST-HSC SC3_CF1.csv	C9	SC3	CF	ST-HSC	ckit+SCA1-	TT21	21	24	621	133748	88158.4	19029.8	91.9383	70.7002	279.169	55.0664	148.735	1106.39	22.494	352.732	73.0607	151130	121664	104312	7109.46	4995.46	-21.7269	2866.44	33760.6	94.8708	-0.720217	3.51469	1	1	0	0	0	MEP,
997	export_C9 ST-HSC SC3_CV1.csv	C9	SC3	CV	ST-HSC	HSC_ST	TT21	21	24	622	146673	117220	19885.1	157.654	166.804	228.799	13053.4	418.063	2387.22	161.631	326.395	162.669	157592	75432.9	76382.5	1320.35	4944.6	7583.35	-33.9343	534.539	93.653	-0.276999	0.80906	1	1	0	0	0	ST-HSC,
998	export_C9 ST-HSC SC3_VC0.csv	C9	SC3	VC	ST-HSC	HSC_SLAM	TT21	21	24	623	126689	94372.2	11032.1	427.108	165.75	164.496	42071.5	-14.3923	53.3625	2615.09	206.731	130.283	144868	80045.4	29410.9	298.499	6759.58	24984.8	-253.629	6692.61	209.328	0.364875	-4.29697	1	1	0	0	0	SLAM-HSC,
999	export_C9 ST-HSC SC3_Vi1.csv	C9	SC3	Vi	ST-HSC	MPP	TT21	21	24	624	121394	79867.4	0.946914	83.3915	587.867	327.332	44198.1	-29.1441	353.354	5685.95	211.089	66.2732	157222	86428.5	-8.33	651.078	4084.99	37919.1	241.064	4577.96	252.302	-1.08849	-3.13132	1	1	0	0	0	MPP,
1000	export_D1 MPP SC2_CF2.csv	D1	SC2	CF	MPP	ckit+SCA1-	TT21	21	24	625	78499.9	67043	17288.6	135.546	782.29	274.588	48.4584	99.8483	549.053	82.3266	263.681	78.083	133747	69148.5	74948.6	1945.23	3211.17	1.8657	-574.882	6754.27	921.918	-3.06688	-0.171044	1	1	0	0	0	MEP,
1001	export_D1 MPP SC2_Vi2.csv.1	D1	SC2	Vi	MPP	ckit+SCA1-	TT21	21	24	626	103297	58621.1	1.70561	118.427	530.875	195.417	22700.7	225.706	997.278	94.2676	533.716	15.7891	195348	115787	9.52	6667.22	4044.39	38973.8	479.524	3982.61	927.13	-2.7168	0.170933	1	2	0	0	0	MPP,MEP,
1002	export_D1 MPP SC2_Vi2.csv.2	D1	SC2	Vi	MPP	MPP	TT21	21	24	626	109489	72206.8	1.78721	49.8354	752.219	161.842	24728.8	141.658	827.089	136.54	325.408	89.223	195348	115787	9.52	6667.22	4044.39	38973.8	479.524	3982.61	927.13	-2.92929	-0.255531	2	2	0	0	0	MPP,MEP,
1003	export_D10 ST-HSC SC3_CV1.csv	D10	SC3	CV	ST-HSC	HSC_ST	TT21	21	24	627	125482	78932.2	25276.7	40.5921	161.074	111.916	16851	159.014	67.0724	2665.41	188.076	7.70014	149869	83792.7	65578.5	121.489	6880.75	8779.97	117.794	14810	251.942	-0.863275	-2.95508	1	1	0	0	0	ST-HSC,
1004	export_D10 ST-HSC SC3_VC1.csv	D10	SC3	VC	ST-HSC	ckit+SCA1-	TT21	21	24	628	100765	65165.3	9037.63	57.1106	123.867	282.979	37840.5	183.265	650.465	77.6186	179.011	205.444	111669	87779.2	20414.5	653.303	4381.04	26533.1	450.307	470.999	205.372	-1.02417	2.43091	1	1	0	0	0	MEP,
1005	export_D10 ST-HSC SC3_Vi1.csv	D10	SC3	Vi	ST-HSC	MPP	TT21	21	24	629	100131	68819	3.66343	183.97	819.872	432.401	39391.9	228.588	1277.81	1005.38	328.084	102.237	152532	79872.8	15.47	1151.55	3885.71	45840.2	-230.104	2697.4	236.696	-2.33152	-3.35667	1	1	0	0	0	MPP,
1006	export_D11 HSC SC3_VC2.csv.1	D11	SC3	VC	HSC	HSC_ST	TT21	21	24	630	107426	61472.8	5812.85	186.083	112.888	226.089	21384.2	103.569	330.452	983.031	378.991	95.605	191786	99462.6	39295	911.072	7605.64	31087.9	6029.07	3825.1	273.141	-0.00127858	-1.6058	1	2	0	0	0	ST-HSC,ST-HSC,
1007	export_D11 HSC SC3_VC2.csv.2	D11	SC3	VC	HSC	HSC_ST	TT21	21	24	630	141076	114235	5908.01	161.723	158.259	184.068	20939.2	111.372	307.38	271.388	248.143	155.237	191786	99462.6	39295	911.072	7605.64	31087.9	6029.07	3825.1	273.141	-0.102616	0.220467	1	2	0	0	0	ST-HSC,ST-HSC,
1008	export_D12 HSC SC3_CF2.csv.1	D12	SC3	CF	HSC	ckit+SCA1-	TT21	21	24	631	110881	78814.4	13698.6	1116.94	97.1093	40.3336	49.7893	215.206	124.003	11.9076	198.298	197.691	139948	63748.3	82963.2	410.61	3382.8	-11.4948	7763.8	1548.44	121.597	5.5412	0.613397	1	2	0	0	0	SLAM+MEP,SLAM+MEP,
1009	export_D12 HSC SC3_CF2.csv.2	D12	SC3	CF	HSC	ckit+SCA1-	TT21	21	24	631	90979.8	55672.5	12952.6	955.363	69.6544	116.206	27.2747	71.9455	82.4567	3.25425	227.442	201.141	139948	63748.3	82963.2	410.61	3382.8	-11.4948	7763.8	1548.44	121.597	5.40167	1.12977	1	2	0	0	0	SLAM+MEP,SLAM+MEP,
1010	export_D12 HSC SC3_VC0.csv	D12	SC3	VC	HSC	HSC_SLAM	TT21	21	24	632	121894	80488.7	11223.9	985.141	201.697	439.05	43689.1	-212.298	17.0989	7987.11	494.574	97.4702	168752	90123.5	31093.5	440.502	3251.69	31117.4	7140.62	34574.9	330.323	0.934339	-5.77503	1	1	0	0	0	SLAM-HSC,
1011	export_D12 HSC SC3_Vi2.csv	D12	SC3	Vi	HSC	HSC_ST	TT21	21	24	633	108346	72449.1	1.50134	283.323	149.501	105.291	23334.4	123.735	59.5776	951.464	512.342	202	167762	104014	-13.09	847.757	9508.8	37735.9	8030.38	21023.1	-105.578	0.562884	-1.54035	1	1	0	0	0	SLAM-HSC,
1012	export_D2 MPP SC2_CF1.csv	D2	SC2	CF	MPP	MPP	TT21	21	24	634	99998.4	59960.9	25378.2	44.6958	932.771	86.4767	33.3689	54.9444	96.9729	335.639	367.07	71.7463	138334	80098.9	75155.6	588.641	3897.39	0.72063	-145.457	6394.01	793.737	-2.61769	-1.19423	1	1	0	0	0	MPP,
1013	export_D2 MPP SC2_VC2.csv	D2	SC2	VC	MPP	ckit+SCA1-	TT21	21	24	635	165315	96117.3	4622.35	-0.721743	175.513	6792.91	14299	667.203	737.198	-9.54636	536.467	211.703	162108	142022	38299	2843.94	6218.18	21761.2	-857.302	776.526	4377.57	-4.89082	3.75721	1	1	0	0	0	GMP,
1014	export_D2 MPP SC2_Vi1.csv.1	D2	SC2	Vi	MPP	ckit+SCA1-	TT21	21	24	636	103628	64032.2	1.40955	111.241	592.946	173.805	43925.1	152.108	622.876	83.3634	243.921	17.6186	128577	99165.1	32.13	5106.76	3802.74	39187.3	-496.733	1416.9	763.43	-2.89786	-0.110479	1	2	0	0	0	SLAM-HSC,MEP,
1015	export_D2 MPP SC2_Vi1.csv.2	D2	SC2	Vi	MPP	SLAM+Flt3+	TT21	21	24	636	73961.8	38395.6	3.53239	9362.25	308.48	207663	43635.6	109445	-4153.96	114828	17552.4	102.487	128577	99165.1	32.13	5106.76	3802.74	39187.3	-496.733	1416.9	763.43	-5.29686	-5.78354	2	2	0	0	0	SLAM-HSC,MEP,
1016	export_D3 ST-HSC SC2_CF1.csv	D3	SC2	CF	ST-HSC	ckit+SCA1-	TT21	21	24	637	86087.4	45017	20836.6	55.4028	982.152	318.096	96.0066	120.149	420.604	98.0899	246.635	62.3649	122044	59346.5	76868.1	-223.025	2930.82	-12.2432	701.068	4738.2	434.645	-3.13083	-0.10202	1	1	0	0	0	MEP,
1017	export_D3 ST-HSC SC2_CV1.csv	D3	SC2	CV	ST-HSC	ckit+SCA1-	TT21	21	24	638	85041.7	48200.8	14376.5	85.9458	414.68	243.144	12002.2	38.0593	174.043	95.8403	257.339	5.65352	151454	81372.2	69869.7	1953.72	4312.16	7443.51	130.866	2262.42	595.008	-2.74007	0.336105	1	1	0	0	0	MEP,
1018	export_D3 ST-HSC SC2_VC1.csv	D3	SC2	VC	ST-HSC	HSC_SLAM	TT21	21	24	639	108541	81810.9	7616.34	643.622	153.642	357.883	28555.1	190.634	892.635	623.632	481.546	55.8323	141510	59904.6	21399.8	15303.5	4673.63	20557	-2027.4	1094.47	130.849	1.31473	-2.08133	1	1	0	0	0	SLAM-HSC,
1019	export_D3 ST-HSC SC2_Vi2.csv	D3	SC2	Vi	ST-HSC	ckit+SCA1-	TT21	21	24	640	114638	84746.9	1.85855	102.452	272.246	116.464	22134.4	167.15	983.594	29.1687	615.211	161.479	219569	152286	20.23	3691.46	6704.55	44531	-844.652	1745.21	202.63	-0.0282434	2.98672	1	1	0	0	0	MEP,
1020	export_D4 ST-HSC SC2_CF1.csv	D4	SC2	CF	ST-HSC	HSC_ST	TT21	21	24	641	133421	73064.3	36102.6	181.395	267.609	123.917	87.8114	77.3197	463.394	766.181	287.583	192.357	145651	75968.4	127271	7774.9	5427.33	-16.2033	1020.56	4907.87	528.879	-0.240531	-1.403	1	1	0	0	0	ST-HSC,
1021	export_D4 ST-HSC SC2_CV2.csv	D4	SC2	CV	ST-HSC	HSC_ST	TT21	21	24	642	117674	73661.3	12206.7	65.2419	157.806	140.563	8227.04	96.0869	97.2611	466.127	410.092	83.8039	165267	160863	99788.6	2872.34	8857.7	10522.5	1753.3	8049.27	170.005	-0.577882	-0.352166	1	1	0	0	0	ST-HSC,
1022	export_D5 HSC SC2_CF1.csv	D5	SC2	CF	HSC	ckit+SCA1-	TT21	21	24	643	158324	88477.3	25899.2	1424.52	79.0884	87.2436	73.1505	118.253	67.2562	13.1219	203.971	64.4745	132890	77742.7	75310.3	919.047	7231.35	-32.0016	3469.36	1538.33	-51.0074	5.60979	0.628805	1	1	0	0	0	SLAM+MEP,
1023	export_D5 HSC SC2_CV1.csv	D5	SC2	CV	HSC	HSC_SLAM	TT21	21	24	644	96909.6	59143.7	23896.2	1209.04	182.163	269.632	13778.1	-66.1733	10.5304	3261.3	299.888	190.609	141457	76966.8	74730.8	417.648	3924.27	8143.86	5292.62	18749.6	7.21038	0.791033	-5.43353	1	1	0	0	0	SLAM-HSC,
1024	export_D6 HSC SC2_Vi2.csv.1	D6	SC2	Vi	HSC	HSC_SLAM	TT21	21	24	645	144085	93091.7	1.41883	886.069	130.33	565.436	26867.5	105.514	789.711	287.825	184.005	194.864	184695	119922	42.84	6591.93	4895.86	46202.2	9453.3	26039	117.821	4.06746	-0.192522	1	2	0	0	0	SLAM-HSC,SLAM-HSC,
1025	export_D6 HSC SC2_Vi2.csv.2	D6	SC2	Vi	HSC	HSC_SLAM	TT21	21	24	645	124745	118302	1.91068	630.332	92.6802	159.972	24526	148.268	771.488	193.799	405.782	205.681	184695	119922	42.84	6591.93	4895.86	46202.2	9453.3	26039	117.821	2.72094	-0.9626	1	2	0	0	0	SLAM-HSC,SLAM-HSC,
1026	export_D7 MPP SC3_CV1.csv	D7	SC3	CV	MPP	HSC_ST	TT21	21	24	646	135578	70087.3	22563.4	107.347	235.983	323.905	17801.2	162.675	1046.31	296.318	275.357	2.15013	138261	84735.1	66001	5569.32	5094.37	9424.75	170.843	2876.02	625.378	-1.42381	-0.499009	1	1	0	0	0	ST-HSC,
1027	export_D7 MPP SC3_Vi1.csv	D7	SC3	Vi	MPP	SLAM+Flt3+	TT21	21	24	647	99964.9	71892.5	5.49806	384.405	323.951	262.219	32523.1	291.122	1516.13	312.605	353.52	47.1179	140269	95729.6	-1.19	3107.16	3858.17	56237.5	924.949	1130.93	1004.82	-1.27277	-0.644369	1	1	0	0	0	SLAM-HSC,
1028	export_D8 MPP SC3_CV0.csv	D8	SC3	CV	MPP	MPP	TT21	21	24	648	150188	110409	26245.8	107.954	1771.37	619.839	20538.8	267.805	950.804	400.29	553.609	101.364	163493	81537.6	93469.7	14669.7	3714.7	10676.5	-1807.93	1764.11	3948.65	-3.85343	-0.58799	1	1	0	0	0	MPP,
1029	export_D8 MPP SC3_VC1.csv	D8	SC3	VC	MPP	MPP	TT21	21	24	649	147237	121122	9156.77	257.534	2528.29	396.735	35139.5	266.669	761.806	777.042	360.906	77.6956	169174	97342	26340.7	11357	3921.46	24381.2	28.6392	6122.19	4119.79	-2.92216	-2.89392	1	1	0	0	0	SLAM+FLT3+,
1030	export_D9 ST-HSC SC3_CF1.csv	D9	SC3	CF	ST-HSC	SLAM+Flt3+	TT21	21	24	650	145557	88544.9	22966.8	501.648	374.926	202.981	116.415	347.406	1735.81	478.753	412.4	64.5276	137663	73809.8	84754.2	1695.11	4419.44	-16.74	166.202	3284.94	304.365	1.15281	-1.72152	1	1	0	0	0	SLAM-HSC,
1031	export_D9 ST-HSC SC3_CV2.csv.1	D9	SC3	CV	ST-HSC	HSC_ST	TT21	21	24	651	184482	115559	15111.3	95.6659	116.341	667.157	9392.55	313.33	1048.97	114.633	402.021	24.6058	225440	114858	111637	7407.48	2690.68	11923.3	2221.28	3229.79	77.8702	-2.64221	2.33242	1	2	0	0	0	ST-HSC,ST-HSC,
1032	export_D9 ST-HSC SC3_CV2.csv.2	D9	SC3	CV	ST-HSC	HSC_ST	TT21	21	24	651	177714	145203	16056.9	92.1274	168.834	610.986	9652.75	131.218	994.863	239.087	403.508	56.578	225440	114858	111637	7407.48	2690.68	11923.3	2221.28	3229.79	77.8702	-2.34981	1.573	1	2	0	0	0	ST-HSC,ST-HSC,
1033	export_D9 ST-HSC SC3_VC2.csv.1	D9	SC3	VC	ST-HSC	HSC_SLAM	TT21	21	24	652	140688	89110.4	4463.98	476.1	113.282	208.419	17838.6	197.944	1131.76	133.791	340.713	80.4949	144083	87240.1	19105.5	1066.65	7147.73	27815.8	567.861	2606.31	176.821	3.18866	0.729548	1	2	0	0	0	SLAM-HSC,SLAM-HSC,
1034	export_D9 ST-HSC SC3_VC2.csv.2	D9	SC3	VC	ST-HSC	HSC_SLAM	TT21	21	24	652	139302	93647.7	4848.84	565.206	117.769	152.191	19297.2	156.611	1189.82	634.32	294.084	150.025	144083	87240.1	19105.5	1066.65	7147.73	27815.8	567.861	2606.31	176.821	1.39591	-2.76403	1	2	0	0	0	SLAM-HSC,SLAM-HSC,
1035	export_D9 ST-HSC SC3_Vi2.csv.1	D9	SC3	Vi	ST-HSC	ckit+SCA1-	TT21	21	24	653	152387	79934.3	2.109	125.1	137.432	871.856	23691.4	331.126	2309.91	77.0801	490.713	14.2051	185390	91809.7	-3.57	5831.52	9428.79	38658.6	2428.7	646.815	294.264	-3.02804	2.7806	1	2	0	0	0	GMP,GMP,
1036	export_D9 ST-HSC SC3_Vi2.csv.2	D9	SC3	Vi	ST-HSC	ckit+SCA1-	TT21	21	24	653	134349	86739.5	2.74973	155.34	140.416	1032.93	23073.9	412.465	2311.55	67.1521	367.132	141.567	185390	91809.7	-3.57	5831.52	9428.79	38658.6	2428.7	646.815	294.264	-3.1233	2.82068	1	2	0	0	0	GMP,GMP,
1037	export_E1 MPP SC2_CF1.csv	E1	SC2	CF	MPP	MPP	TT21	21	24	654	107863	67457.1	20589.6	146.016	391.86	60.7835	75.1082	206.189	826.187	173.898	450.39	55.3499	170713	137136	149162	15709.5	5763.81	-5.2661	-280.55	5743.53	1076.07	0.0704591	1.34797	1	1	0	0	0	ST-HSC,
1038	export_E1 MPP SC2_CV1.csv	E1	SC2	CV	MPP	MPP	TT21	21	24	655	92865.3	54938.2	16538.3	121.041	707.083	121.025	13070.1	151.029	219.94	231.008	258.366	198.39	140377	59400	61615.8	7712.63	2436.59	7731.95	778.179	1678.92	1591.4	-2.65326	-0.798566	1	1	0	0	0	MPP,
1039	export_E10 ST-HSC SC3_CF2.csv.1	E10	SC3	CF	ST-HSC	HSC_ST	TT21	21	24	656	125900	80527.1	16019.7	119.305	135.441	175.507	70.0036	13.0266	317.213	399.662	188.019	106.935	114813	159748	66646	2208.18	6861.01	-15.9001	44.5695	6639.88	509.283	-0.0826811	-0.561413	1	2	0	0	0	SLAM-HSC,ST-HSC,
1040	export_E10 ST-HSC SC3_CF2.csv.2	E10	SC3	CF	ST-HSC	HSC_ST	TT21	21	24	656	96974.1	59496.3	15046	297.199	95.9809	18.8948	49.8697	139.753	364.357	269.431	171.424	119.045	114813	159748	66646	2208.18	6861.01	-15.9001	44.5695	6639.88	509.283	1.29604	-0.119269	2	2	0	0	0	SLAM-HSC,ST-HSC,
1041	export_E10 ST-HSC SC3_CV1.csv	E10	SC3	CV	ST-HSC	SLAM+Flt3+	TT21	21	24	657	135485	110635	21137	361.967	399.295	281.746	15082.4	389.587	2783.82	510.498	198.616	72.7163	136362	73865.7	78212.8	2375.79	3385.98	7141.68	-732.33	1839.95	270.123	0.102573	-2.07484	1	1	0	0	0	SLAM-HSC,
1042	export_E10 ST-HSC SC3_VC2.csv	E10	SC3	VC	ST-HSC	HSC_ST	TT21	21	24	658	99343.1	61981.3	4857.81	125.926	127.206	97.1836	21598.4	105.998	121.105	417.94	434.844	192.161	159086	120402	24341.5	1172.81	4110.22	31428.1	826.163	12091.7	-21.6949	-0.213749	-0.459226	1	1	0	0	0	ST-HSC,
1043	export_E11 HSC SC3_CF1.csv	E11	SC3	CF	HSC	HSC_SLAM	TT21	21	24	659	137239	98299.1	30082	2922.71	164.826	542.204	99.5096	93.7045	106.368	975.761	463.557	128.837	150348	75868.5	100716	1008.79	4533.14	-36.3557	13512.2	21415	-60.337	3.21604	-2.64184	1	1	0	0	0	SLAM-HSC,
1044	export_E11 HSC SC3_Vi1.csv	E11	SC3	Vi	HSC	ckit+SCA1-	TT21	21	24	660	147275	136736	1.70664	1570.1	83.5201	604.135	42267.5	373.357	916.428	8.88576	261.872	35.2841	205771	146314	17.85	2108.22	10760.1	61840	15464.2	6530.23	15.4382	4.35802	-0.302887	1	2	0	0	0	SLAM-HSC,GMP,
1045	export_E11 HSC SC3_Vi2.csv	E11	SC3	Vi	HSC	HSC_ST	TT21	21	24	660	153473	102837	1.51367	306.356	240.644	141.257	26208.3	35.1518	130.834	2176.95	198.254	48.1717	205771	146314	17.85	2108.22	10760.1	61840	15464.2	6530.23	15.4382	0.231643	-3.9489	2	2	0	0	0	SLAM-HSC,GMP,
1046	export_E12 HSC SC3_CF1.csv	E12	SC3	CF	HSC	HSC_SLAM	TT21	21	24	661	124933	65649.8	19984.6	6033.02	51.1091	240.38	73.5632	298.468	-28.9068	1917.08	252.416	3240313	141519	65276.3	73584.8	781.967	4454.48	-71.0713	45839.8	2787.87	-293.344	1.6893	-5.61488	1	1	0	0	0	SLAM-HSC,
1047	export_E12 HSC SC3_VC2.csv	E12	SC3	VC	HSC	ckit-	TT21	21	24	662	116176	53862.9	6306.06	2201.72	17.3122	184.22	21122.2	65.3273	15.8033	246.355	134.233	3823122	88863	116209	41508.4	563.273	9420.07	27599.5	22973	894.077	81.8384	3.82279	-1.54592	1	1	0	0	0	SLAM-HSC,
1048	export_E12 HSC SC3_Vi4.csv	E12	SC3	Vi	HSC	SLAM+Flt3+	TT21	21	24	663	74626.7	44883.8	-3.46082	5257.26	304.033	208633	5919.95	112317	-3906.07	2900.58	2436.05	8255889	139236	92530.8	-9.52	-206.179	5211.78	34441.6	53466.3	4421.73	-209.778	-5.46629	-5.93929	1	1	0	0	0	SLAM-HSC,
1049	export_E2 MPP SC2_Vi2.csv.1	E2	SC2	Vi	MPP	MPP	TT21	21	24	664	107316	52660	2.35697	201.263	1070.68	211.669	23403.5	32.9362	360.539	883.551	217.281	173.485	189400	135362	9.52	4614.23	4910.19	43516.6	1195.79	27661.1	2992.93	-2.62628	-2.83937	1	2	0	0	0	MPP,MPP,
1050	export_E2 MPP SC2_Vi2.csv.2	E2	SC2	Vi	MPP	MPP	TT21	21	24	664	80662.4	52235.5	0.261496	54.4927	1175.94	184.423	23610.8	145.178	417.71	714.336	255.244	186.983	189400	135362	9.52	4614.23	4910.19	43516.6	1195.79	27661.1	2992.93	-2.52519	-2.16187	1	2	0	0	0	MPP,MPP,
1051	export_E3 ST-HSC SC2_CF1.csv	E3	SC2	CF	ST-HSC	MPP	TT21	21	24	665	134161	105974	21237.2	268.641	890.764	368.115	77.2269	69.9403	273.883	554.613	299.075	79.5509	152995	84177	72695.9	448.147	3690.02	-13.289	-323.372	16001.9	99.5174	-2.67435	-2.92043	1	1	0	0	0	SLAM+FLT3+,
1052	export_E3 ST-HSC SC2_CV1.csv	E3	SC2	CV	ST-HSC	MPP	TT21	21	24	666	111024	81644.4	19943.9	69.3897	551.037	320.28	12492.5	214.778	907.761	169.27	451.706	18.6846	124986	59052.6	75322.2	3576.8	4061.05	6845.9	683.903	492.169	617.882	-2.86574	-0.165109	1	1	0	0	0	MPP,
1053	export_E3 ST-HSC SC2_VC1.csv	E3	SC2	VC	ST-HSC	HSC_SLAM	TT21	21	24	667	153727	115727	11586.3	1444.23	86.7386	269.465	38018.6	207.4	70.493	6344.49	521.33	11.4984	151153	106368	24096.3	1143.93	3371.18	26667.6	1858.9	3874.86	162.564	1.18111	-5.72949	1	1	0	0	0	SLAM-HSC,
1054	export_E3 ST-HSC SC2_Vi1.csv	E3	SC2	Vi	ST-HSC	HSC_ST	TT21	21	24	668	144613	102596	1.68369	282.307	293.902	212.579	51179.3	155.105	1036.4	207.244	337.486	89.6181	133312	75631.6	1.19	2069.52	6449.34	40582.8	306.204	10701.2	415.522	-1.31182	-0.49068	1	2	0	0	0	SLAM-HSC,SLAM-HSC,
1055	export_E3 ST-HSC SC2_Vi4.csv	E3	SC2	Vi	ST-HSC	SLAM+Flt3+	TT21	21	24	668	92619.1	66376	2.3312	5029.3	355.671	208835	6205.92	108655	-3727.25	2594.38	2271.58	45.4268	133312	75631.6	1.19	2069.52	6449.34	40582.8	306.204	10701.2	415.522	-5.48693	-5.95681	1	2	0	0	0	SLAM-HSC,SLAM-HSC,
1056	export_E4 ST-HSC SC2_Vi1.csv	E4	SC2	Vi	ST-HSC	HSC_ST	TT21	21	24	669	122209	83700.2	0.861316	161.128	269.154	265.615	47737.5	-48.2513	75.6659	6050.11	518.087	198.051	146007	122406	2.38	903.797	3432.41	39775.1	521.072	20067.1	218.431	-0.592422	-3.81144	1	1	0	0	0	ST-HSC,
1057	export_E5 HSC SC2_Vi1.csv	E5	SC2	Vi	HSC	HSC_SLAM	TT21	21	24	670	166208	109361	3.77216	465.694	169.51	130.738	45084.7	190.313	113.717	1181.8	355.456	8.29909	153798	73776.4	15.47	359.12	4651.54	34850.5	6394.53	10457.7	-23.4061	1.07938	-3.45628	1	2	0	0	0	SLAM-HSC,SLAM-HSC,
1058	export_E5 HSC SC2_Vi3.csv	E5	SC2	Vi	HSC	HSC_SLAM	TT21	21	24	670	77924.3	44943.1	-1.19361	8144	256.43	207588	8048.02	131494	-4661.4	8037.56	3307.44	108.143	153798	73776.4	15.47	359.12	4651.54	34850.5	6394.53	10457.7	-23.4061	-5.45233	-5.93028	1	2	0	0	0	SLAM-HSC,SLAM-HSC,
1059	export_E6 HSC SC2_CF1.csv	E6	SC2	CF	HSC	HSC_SLAM	TT21	21	24	671	119734	68524.6	29859.9	834.239	107.769	76.3862	35.4578	99.1117	59.9774	630.409	424.017	213.403	136693	77823.6	89529.7	94.3759	6417.96	-36.2016	4469.43	2924.53	-30.9107	1.72144	-3.06312	1	1	0	0	0	SLAM-HSC,
1060	export_E6 HSC SC2_CV1.csv.1	E6	SC2	CV	HSC	HSC_SLAM	TT21	21	24	672	114158	55675.5	15576.4	417.405	124.452	137.309	11679.3	80.3532	27.5903	285.59	275.623	40.0299	177626	109745	107265	563.527	6756.17	12153.4	4197.19	2885.24	162.834	2.39192	-0.962434	1	2	0	0	0	SLAM-HSC,SLAM-HSC,
1061	export_E6 HSC SC2_CV1.csv.2	E6	SC2	CV	HSC	HSC_SLAM	TT21	21	24	672	133698	78950.7	15879.7	408.845	130.529	316.206	12165.9	-21.6142	55.8005	171.964	312.386	213.657	177626	109745	107265	563.527	6756.17	12153.4	4197.19	2885.24	162.834	3.10045	0.740414	1	2	0	0	0	SLAM-HSC,SLAM-HSC,
1062	export_E6 HSC SC2_VC0.csv	E6	SC2	VC	HSC	ckit+SCA1-	TT21	21	24	673	144819	72208.5	14605.4	1374.24	89.5267	266.541	65315.7	82.8737	65.1725	-17.3954	172.634	213.939	112930	115719	25924.2	283.627	4109.8	45489.1	19710.9	1645.06	247.183	5.69226	1.15351	1	1	0	0	0	SLAM+MEP,
1063	export_E7 MPP SC3_CV1.csv	E7	SC3	CV	MPP	MPP	TT21	21	24	674	166402	118493	26577.4	166.057	430.411	384.965	14799	241.665	1473.05	242.218	300.464	70.2873	127064	78409.1	100901	2123.41	3770.14	7203.89	113.003	2890.44	9351.6	-2.00204	0.0903325	1	1	0	0	0	ST-HSC,
1064	export_E7 MPP SC3_Vi2.csv.1	E7	SC3	Vi	MPP	MPP	TT21	21	24	675	109384	74499.1	2.14527	175.747	766.883	222.41	27129.7	195.308	874.81	601.65	265.407	106.59	151638	135472	9.52	5751.16	5416.93	47329.9	412.092	4335.54	2166.6	-2.67451	-2.69556	1	2	0	0	0	MPP,MPP,
1065	export_E7 MPP SC3_Vi2.csv.2	E7	SC3	Vi	MPP	MPP	TT21	21	24	675	91629.9	69718.9	4.67015	103.741	793.458	385.721	25071.6	128.017	770.293	535.187	157.207	145.584	151638	135472	9.52	5751.16	5416.93	47329.9	412.092	4335.54	2166.6	-2.58817	-2.67617	1	2	0	0	0	MPP,MPP,
1066	export_E8 MPP SC3_CV1.csv	E8	SC3	CV	MPP	SLAM+Flt3+	TT21	21	24	676	142258	98166.4	19484.6	384.173	757.772	258.503	12497.2	72.4016	637.475	1279.85	225.477	23.2264	139409	66455.6	66328.2	1567.36	3667.61	6583.22	-2.73923	17937.4	1392.97	-1.74101	-3.82107	1	1	0	0	0	SLAM+FLT3+,
1067	export_E8 MPP SC3_Vi2.csv.1	E8	SC3	Vi	MPP	MPP	TT21	21	24	677	110564	67791.4	1.57224	233.657	715.986	450.054	21580	131.194	1033.29	459.32	223.597	53.6549	185295	109674	-14.28	2740.6	3698.65	35392.8	-221.407	18739.2	1720.38	-2.68991	-2.97243	1	2	0	0	0	MPP,MPP,
1068	export_E8 MPP SC3_Vi2.csv.2	E8	SC3	Vi	MPP	MPP	TT21	21	24	677	116781	63782.6	1.89978	142.874	759.617	199.513	22175.8	266.92	1189.28	493.768	268.657	83.557	185295	109674	-14.28	2740.6	3698.65	35392.8	-221.407	18739.2	1720.38	-2.67981	-2.53089	1	2	0	0	0	MPP,MPP,
1069	export_E9 ST-HSC SC3_CF1.csv	E9	SC3	CF	ST-HSC	HSC_ST	TT21	21	24	678	126094	87416.6	26067.5	293.701	72.0178	134.975	73.1507	61.8948	73.1544	236.016	588.144	62.6886	147897	71763	82125.5	-538.284	6208.07	-6.93986	1972.24	1513.41	301.423	1.06458	-0.398762	1	1	0	0	0	SLAM-HSC,
1070	export_E9 ST-HSC SC3_VC1.csv	E9	SC3	VC	ST-HSC	HSC_ST	TT21	21	24	679	162710	120575	10932.3	143.236	261.287	1288.12	32999.4	276.955	1263.03	846.318	365.146	196.129	147300	90075.9	30821	914.488	4480.8	23833.7	578.948	1893.53	444.243	-1.29355	-1.60516	1	1	0	0	0	ST-HSC,
1071	export_E9 ST-HSC SC3_Vi1.csv	E9	SC3	Vi	ST-HSC	ckit-	TT21	21	24	680	110008	57671.4	6.5427	636.14	180.594	185.379	33440.7	-48.0538	54.2064	2787.59	126.876	122.153	168434	105867	2.38	1165.33	6161.62	49427.2	351.412	19001.1	444.299	0.457233	-4.72739	1	1	0	0	0	SLAM-HSC,
1072	export_F1 MPP SC2_CF1.csv	F1	SC2	CF	MPP	MPP	TT21	21	24	681	115463	81940.1	30994.2	97.2856	1068.47	254.062	113.159	199.39	550.165	186.775	495.211	55.57	168967	110712	124436	3498.95	3739.44	-5.18587	-886.136	1013.38	1627.81	-3.15542	-0.742451	1	1	0	0	0	MPP,
1073	export_F1 MPP SC2_CV1.csv	F1	SC2	CV	MPP	MPP	TT21	21	24	682	100967	70423.4	17471.1	105.795	1090.43	376.311	13981.2	80.4339	339.034	152.524	301.05	198.876	148073	75858.9	59264.4	703.788	3155.52	8191.95	1022.54	7569.22	1671.2	-3.32842	-0.412483	1	1	0	0	0	MPP,
1074	export_F1 MPP SC2_Vi2.csv.1	F1	SC2	Vi	MPP	MPP	TT21	21	24	683	100726	54225.9	3.9175	90.2374	566.852	141.926	24112.9	179.194	402.57	622.435	666.87	72.5397	193825	144729	-2.38	18990	6295.18	53319	2568.42	7871.92	3505.49	-2.33309	-1.07672	1	2	0	0	0	MPP,MPP,
1075	export_F1 MPP SC2_Vi2.csv.2	F1	SC2	Vi	MPP	MPP	TT21	21	24	683	85123.9	41464	7.70853	181.861	954.687	249.058	23292.3	93.486	329.077	682.233	470.711	122.095	193825	144729	-2.38	18990	6295.18	53319	2568.42	7871.92	3505.49	-2.73683	-2.65963	1	2	0	0	0	MPP,MPP,
1076	export_F10 ST-HSC SC3_CF2.csv.1	F10	SC3	CF	ST-HSC	ckit+SCA1-	TT21	21	24	684	122096	73400	16444.5	113.189	366.606	477.879	97.3556	180.431	1291.34	36.305	205.236	104.545	158499	73810.9	111768	2489.53	2908.65	-21.2159	11.4145	960.445	612.96	-2.93849	0.962259	1	2	0	0	0	ST-HSC,MEP,
1077	export_F10 ST-HSC SC3_CF2.csv.2	F10	SC3	CF	ST-HSC	MPP	TT21	21	24	684	120845	75022.9	16381.9	83.5222	407.163	715.898	80.5848	136.803	1322.57	103.919	216.422	208.231	158499	73810.9	111768	2489.53	2908.65	-21.2159	11.4145	960.445	612.96	-2.92485	0.975422	2	2	0	0	0	ST-HSC,MEP,
1078	export_F10 ST-HSC SC3_VC1.csv	F10	SC3	VC	ST-HSC	HSC_ST	TT21	21	24	685	175058	143600	8252.66	270.269	190.445	1224.11	32601.1	352.353	1853.66	237.943	595.712	210.325	157895	71145.3	21257	2495.42	9033.72	24128	-231.156	2248.56	126.163	-2.65922	1.18474	1	1	0	0	0	SLAM-HSC,
1079	export_F10 ST-HSC SC3_Vi2.csv.1	F10	SC3	Vi	ST-HSC	ckit+SCA1-	TT21	21	24	686	117997	66478.6	0.792183	227.063	132.151	270.842	21163.8	282.397	1835.89	91.3204	546.028	131.265	177991	115234	14.28	1245.88	5794.13	37326.3	971.285	1748.62	202.016	2.86333	1.55604	1	2	0	0	0	MEP,MEP,
1080	export_F10 ST-HSC SC3_Vi2.csv.2	F10	SC3	Vi	ST-HSC	ckit+SCA1-	TT21	21	24	686	128447	61660.5	3.86043	229.932	130.186	411.693	22261.5	230.138	1876	59.8616	444.273	202.867	177991	115234	14.28	1245.88	5794.13	37326.3	971.285	1748.62	202.016	3.02871	1.58071	1	2	0	0	0	MEP,MEP,
1081	export_F11 HSC SC3_CF1.csv	F11	SC3	CF	HSC	HSC_SLAM	TT21	21	24	687	119591	77930.3	29247	1607.43	134.866	93.86	65.2218	28.3343	335.108	1082.55	320.034	20.6638	115857	76627.7	83266.7	53.2625	8246.29	-30.7755	7380.82	4313.45	245.857	2.53032	-3.14812	1	1	0	0	0	SLAM-HSC,
1082	export_F11 HSC SC3_CV0.csv	F11	SC3	CV	HSC	ckit+SCA1-	TT21	21	24	688	176675	122182	39787.4	631.826	109.827	151.496	22504.1	85.5908	175.504	57.1497	396.114	36.9766	179306	92300	86424.9	1961.77	2908.8	11195.4	5422.94	527.675	366.832	3.89932	1.09185	1	1	0	0	0	SLAM+MEP,
1083	export_F11 HSC SC3_Vi1.csv.1	F11	SC3	Vi	HSC	HSC_SLAM	TT21	21	24	689	125087	84250.9	0.747171	1361.26	74.4873	206.25	33469.9	90.0811	40.8085	169.075	310.383	2.34963	103649	137099	-23.8	230.772	7642.56	55999	21867.3	3403	-103.516	3.84546	-1.07571	1	2	0	0	0	SLAM-HSC,SLAM-HSC,
1084	export_F11 HSC SC3_Vi1.csv.2	F11	SC3	Vi	HSC	HSC_SLAM	TT21	21	24	689	115569	84124.9	1.03468	1479.21	111.739	155.523	30922.7	123.345	47.4762	166.528	317.981	181.686	103649	137099	-23.8	230.772	7642.56	55999	21867.3	3403	-103.516	3.84169	-1.08929	1	2	0	0	0	SLAM-HSC,SLAM-HSC,
1085	export_F12 HSC SC3_CV1.csv	F12	SC3	CV	HSC	ckit+SCA1-	TT21	21	24	690	100896	86824.3	13113.2	1344.9	70.8542	674.044	9886.45	30.7134	469.193	49.151	524.432	157.641	112072	52900.3	50412	1533.23	6859.22	6587.88	10677.6	1035.55	23.4415	4.24903	-0.256653	1	1	0	0	0	GMP,
1086	export_F12 HSC SC3_VC1.csv	F12	SC3	VC	HSC	HSC_SLAM	TT21	21	24	691	128406	87730.5	7983.28	1415.56	90.0801	154.313	34626.6	111.967	49.2059	2353.03	431.881	208.319	147500	79458.7	24221.3	358.434	8359.09	24333.6	10080.3	3545.8	-9.57563	1.37983	-5.16782	1	1	0	0	0	SLAM-HSC,
1087	export_F2 MPP SC2_CV1.csv	F2	SC2	CV	MPP	HSC_SLAM	TT21	21	24	692	122336	71975	21465.7	406.723	64.44	382.603	14672.7	123.626	834.289	763.406	542.267	40.7732	140844	120265	115819	28896.8	6259.42	15068.8	2149.61	516.385	1020.89	1.19445	-2.16673	1	1	0	0	0	SLAM-HSC,
1088	export_F3 ST-HSC SC2_CF1.csv	F3	SC2	CF	ST-HSC	HSC_SLAM	TT21	21	24	693	121410	70347	26962.1	352.389	187.401	56.4709	51.2379	87.46	57.3349	1064.45	285.341	13.4928	141774	74234.6	79099.3	1343.54	5767.99	-4.37233	1507.04	2745.87	30.7126	0.943667	-3.15004	1	1	0	0	0	SLAM-HSC,
1089	export_F3 ST-HSC SC2_VC2.csv	F3	SC2	VC	ST-HSC	ckit-	TT21	21	24	694	92478.8	77032.7	5686.85	173.602	85.3257	132.327	20162.2	80.1363	58.4072	97.3767	118.407	180.113	149692	86156	35899.9	2003.99	2404.38	28959.8	98.9561	3932.33	194.961	1.34613	1.81837	1	1	0	0	0	ckit-,
1090	export_F3 ST-HSC SC2_Vi4.csv	F3	SC2	Vi	ST-HSC	SLAM+Flt3+	TT21	21	24	695	103966	108290	2.79582	5332.75	413.376	210800	5449.84	72803.1	-2362.83	518.032	1805.14	191.975	191204	136524	15.47	-10.3346	6215.79	42250	331.769	5181.49	222.112	-5.48358	-5.9515	1	1	0	0	0	SLAM-HSC,
1091	export_F4 ST-HSC SC2_VC0.csv	F4	SC2	VC	ST-HSC	HSC_SLAM	TT21	21	24	696	120907	87863.3	15141.7	366.526	161.891	223.139	44718.1	44.4786	117.422	208.07	246.033	55.679	139628	104674	33078.4	436.811	8954.74	30567.3	2346.43	566.47	346.479	3.00869	0.52002	1	1	0	0	0	SLAM-HSC,
1092	export_F5 HSC SC2_CV0.csv	F5	SC2	CV	HSC	HSC_SLAM	TT21	21	24	697	118436	76152.5	23553.5	551.11	127.718	308.688	21352.4	31.1144	49.6409	166.1	168.001	218.382	135731	90901.7	71715.4	637.224	5974.52	11172.3	4638.15	727.513	273.668	3.6053	0.34654	1	1	0	0	0	SLAM-HSC,
1093	export_F6 HSC SC2_CF1.csv	F6	SC2	CF	HSC	HSC_SLAM	TT21	21	24	698	129489	82875.5	32358.7	2079.2	183.155	254.845	75.958	81.0687	33.9631	1555.07	219.111	210.717	151978	89019.1	111008	-6.05438	4774.93	-58.6507	29653.5	19469.1	169.606	1.29462	-5.15847	1	1	0	0	0	SLAM-HSC,
1094	export_F6 HSC SC2_CV1.csv	F6	SC2	CV	HSC	HSC_SLAM	TT21	21	24	699	120624	84502.6	21584.8	2338.35	87.6163	141.353	15184.2	190.054	7.8132	977.233	239.664	210.792	143652	81612.6	83822.4	608.283	5538.34	8366.31	17756.8	16663.7	-145.41	2.86513	-3.02043	1	1	0	0	0	SLAM-HSC,
1095	export_F6 HSC SC2_Vi2.csv.1	F6	SC2	Vi	HSC	ckit+SCA1-	TT21	21	24	700	83090.4	54162.2	1.55764	387.774	113.973	151.176	24023.2	54.1262	436.078	68.6235	371.661	68.2973	100612	151322	21.42	2645.45	5933.58	48604.1	6905.86	2243.54	-5.73467	3.62647	1.31749	1	2	0	0	0	SLAM+MEP,SLAM+MEP,
1096	export_F6 HSC SC2_Vi2.csv.2	F6	SC2	Vi	HSC	ckit+SCA1-	TT21	21	24	700	93110.8	55197.9	1.29174	454.185	70.3285	128.982	23641.8	52.6198	281.893	12.558	193.868	173.646	100612	151322	21.42	2645.45	5933.58	48604.1	6905.86	2243.54	-5.73467	4.55786	2.28866	1	2	0	0	0	SLAM+MEP,SLAM+MEP,
1097	export_F7 MPP SC3_CF1.csv	F7	SC3	CF	MPP	HSC_ST	TT21	21	24	701	151603	86940.2	19466.7	68.4455	165.244	237.783	69.1871	132.205	1173.32	398.492	345.979	151.635	161049	94796.6	137413	3857.08	5379.52	-37.7357	371.121	13105.7	14238.6	-0.994626	-0.444539	1	1	0	0	0	ST-HSC,
1098	export_F9 ST-HSC SC3_CV2.csv	F9	SC3	CV	ST-HSC	HSC_ST	TT21	21	24	702	116356	85027.8	14536	128.885	244.575	162.811	9269.08	214.999	1585.88	825.567	251.266	66.3249	160114	102260	108959	1294.85	4499.08	9300.58	1024.57	7134.95	269.546	-0.554696	-1.44523	1	1	0	0	0	ST-HSC,
1099	export_F9 ST-HSC SC3_VC2.csv	F9	SC3	VC	ST-HSC	HSC_SLAM	TT21	21	24	703	128459	80904.2	3134.75	371.151	97.837	94.135	12194.5	172.387	711.499	146.622	278.028	2.44291	205330	106046	30086.8	15902.9	4825.39	30245.6	2812.22	619.177	71.5657	2.20955	-0.220893	1	1	0	0	0	SLAM-HSC,
1100	export_G1 MPP SC2_CF1.csv	G1	SC2	CF	MPP	MPP	TT21	21	24	704	143076	108323	28717.7	120.151	711.777	481.883	135.931	180.302	167.343	2131.82	618.735	99.5764	143670	138079	129830	4999.24	3147.35	-25.6647	15.4703	25691.7	808.51	-1.92953	-3.07615	1	1	0	0	0	MPP,
1101	export_G1 MPP SC2_CV1.csv	G1	SC2	CV	MPP	MPP	TT21	21	24	705	102087	55778.2	23011.8	0.899343	830.308	80.1619	13427.7	53.443	427.993	481.062	403.75	13.1861	142256	69672.1	81875.6	2400.75	3346.97	6603.6	-31.9044	5558.23	893.885	-2.6051	-1.69511	1	1	0	0	0	MPP,
1102	export_G1 MPP SC2_VC1.csv	G1	SC2	VC	MPP	MPP	TT21	21	24	706	146630	112653	9198.82	219.788	649.498	196.705	27034.4	101.005	667.765	321.19	545.302	117.918	202343	92934.2	26080	4366.05	3664.27	20243	892.909	6325.35	694.094	-2.36264	-0.923501	1	1	0	0	0	MPP,
1103	export_G1 MPP SC2_Vi2.csv.1	G1	SC2	Vi	MPP	MPP	TT21	21	24	707	73976.6	51621.3	23.8167	15.3061	1539.47	189.171	20837.4	144.591	316.419	464.452	923.174	73.8156	194020	142163	-5.95	10320.2	5888.42	40193.6	432.403	856.57	3671.62	-2.9849	-1.45737	1	2	0	0	0	MPP,MPP,
1104	export_G1 MPP SC2_Vi2.csv.2	G1	SC2	Vi	MPP	MPP	TT21	21	24	707	73690.3	51022.4	17.5475	53.6739	1225.33	208.433	21772.8	124.601	417.118	305.258	751.436	118.263	194020	142163	-5.95	10320.2	5888.42	40193.6	432.403	856.57	3671.62	-3.05184	-1.28365	1	2	0	0	0	MPP,MPP,
1105	export_G10 ST-HSC SC3_CF2.csv	G10	SC3	CF	ST-HSC	HSC_ST	TT21	21	24	708	88241.9	50372.4	15061.2	235.574	47.5097	78.4386	42.5632	43.6319	33.6051	340.203	256.58	12.0852	151131	79909.7	108219	-213.274	8266.48	16.8901	1524.28	1574.59	-35.8904	0.801292	-0.436478	1	1	0	0	0	ST-HSC,
1106	export_G10 ST-HSC SC3_CV1.csv	G10	SC3	CV	ST-HSC	HSC_ST	TT21	21	24	709	135366	119238	16358.9	63.9864	225.632	390.914	13705.5	219.265	2078.77	137.924	275.009	98.377	135428	77968.8	49620.6	1939.62	4427.94	7705.38	695.701	660.23	162.6	-2.18879	1.15283	1	1	0	0	0	ST-HSC,
1107	export_G10 ST-HSC SC3_Vi2.csv	G10	SC3	Vi	ST-HSC	MPP	TT21	21	24	710	96717.7	63866.8	4.41664	138.327	403.599	178.772	23342.2	91.3043	205.707	383.365	336.022	124.612	175699	107862	-4.76	-273.416	4418.85	36609.1	656.921	6998.05	372.412	-1.53715	-0.545172	1	1	0	0	0	ST-HSC,
1108	export_G11 HSC SC3_CV1.csv	G11	SC3	CV	HSC	HSC_SLAM	TT21	21	24	711	141804	104395	20175.1	1479.46	184.407	219.346	13655.5	10.5445	57.3927	4687.12	277.409	35.5592	169689	78894.6	81097.3	221.055	4435.71	7718.29	5980.82	22355.7	-154.603	0.913822	-5.5848	1	1	0	0	0	SLAM-HSC,
1109	export_G11 HSC SC3_VC2.csv	G11	SC3	VC	HSC	HSC_SLAM	TT21	21	24	712	136570	91205.5	5191.72	776.958	99.5092	460.919	19008.4	169.128	430.593	105.198	480.262	88.1619	158122	70844.3	26551.3	2293.68	7365.66	23960.1	9527.8	954.745	46.1456	4.1169	-0.0828617	1	1	0	0	0	SLAM-HSC,
1110	export_G11 HSC SC3_Vi1.csv	G11	SC3	Vi	HSC	HSC_SLAM	TT21	21	24	713	111045	72665.4	0.786204	803.342	107.714	164.55	45099.2	38.9128	39.9014	2605.96	198.905	198.141	136278	90540	20.23	265.368	2792.62	40617.2	4732.39	5343.4	-41.3163	0.552922	-4.72921	1	1	0	0	0	SLAM-HSC,
1111	export_G12 HSC SC3_CV1.csv	G12	SC3	CV	HSC	ckit+SCA1-	TT21	21	24	714	84483.4	47941.1	16697.6	990.482	74.7623	161.052	11641.3	52.7981	41.555	73.9336	186.548	31.7847	170458	99386.4	119860	-775.776	6345.45	13007.1	16599.8	4529.18	173.424	5.43672	0.984235	1	1	0	0	0	SLAM+MEP,
1112	export_G12 HSC SC3_VC0.csv	G12	SC3	VC	HSC	ckit-	TT21	21	24	715	73774	37783.3	17539.7	272.017	98.1911	237.372	63521.5	34.8872	33.8441	240.648	23.7808	92.792	120815	63617.4	22212.5	580.754	2264.46	41587.9	3812.96	9156.83	311.54	1.53423	1.56449	1	1	0	0	0	ckit-,
1113	export_G2 MPP SC2_CF1.csv	G2	SC2	CF	MPP	ckit+SCA1-	TT21	21	24	716	107509	70196.2	21608.5	87.4767	574.799	338.344	102.68	69.0211	238.063	66.6096	629.49	67.0143	150356	72981.5	81902.9	1987.45	5055.62	-28.5546	-1096.61	1062.36	854.766	-3.02802	0.576631	1	1	0	0	0	MEP,
1114	export_G3 ST-HSC SC2_CV1.csv	G3	SC2	CV	ST-HSC	HSC_ST	TT21	21	24	717	113022	71653.1	23437.3	206.858	133.12	71.8456	17052.2	107.886	136.683	214.921	254.584	81.3565	128236	83336.9	72065.2	-53.3292	6749.27	8268.72	1072.02	2718.14	69.6459	1.25138	0.0658368	1	1	0	0	0	ST-HSC,
1115	export_G3 ST-HSC SC2_VC1.csv	G3	SC2	VC	ST-HSC	HSC_ST	TT21	21	24	718	133381	86010.5	8149.19	141.34	176.042	107.222	32991.6	139.358	259.231	139.666	269.136	78.7672	153020	70251.7	19041.2	-175.913	3786.64	23408.7	613.13	3683.53	122.318	0.483351	0.946215	1	1	0	0	0	ST-HSC,
1116	export_G4 ST-HSC SC2_VC1.csv	G4	SC2	VC	ST-HSC	HSC_ST	TT21	21	24	719	144846	82714.8	9850.81	253.764	269.52	300.594	36468.8	79.1816	403.41	381.554	393.208	199.382	151524	111759	28630.2	7662	3944.13	26191.4	-589.611	3620.75	171.562	-1.25621	-0.734311	1	1	0	0	0	SLAM-HSC,
1117	export_G5 HSC SC2_CF1.csv	G5	SC2	CF	HSC	HSC_SLAM	TT21	21	24	720	112798	60417.6	30403.2	656.591	102.015	114.146	38.4964	-30.0925	29.5649	1071.83	183.532	77.6939	130033	76432.5	86579.6	224.215	7505.98	-12.5962	3325.4	4359.14	70.181	1.39086	-3.55464	1	1	0	0	0	SLAM-HSC,
1118	export_G7 MPP SC3_CF2.csv	G7	SC3	CF	MPP	MPP	TT21	21	24	721	109241	83064.7	18144.3	168.978	541.541	926.109	82.7918	235.427	1488.47	119.743	288.698	145.822	151163	116023	120424	3294.33	5673.7	-24.1615	-280.738	5052.83	738.78	-2.94644	0.917468	1	1	0	0	0	MPP,
1119	export_G7 MPP SC3_VC1.csv	G7	SC3	VC	MPP	ckit-	TT21	21	24	722	105857	63258	7392.71	157.012	807.363	256.042	24913.6	142.186	928.656	506.692	119.26	138.806	154770	93588.7	25209	4258.55	3166.92	20624.3	569.586	24977.7	1224.82	-2.67333	-2.72719	1	1	0	0	0	MPP,
1120	export_G7 MPP SC3_Vi1.csv	G7	SC3	Vi	MPP	MPP	TT21	21	24	723	110126	58867.5	6.41648	228.98	699.602	279.93	44957.5	235.481	816.356	1155.97	166.142	103.28	129772	71209.6	-2.38	1657.74	2514.85	35699.6	268.31	6854.7	779.46	-1.94346	-3.70096	1	1	0	0	0	MPP,
1121	export_G8 MPP SC3_CV1.csv	G8	SC3	CV	MPP	MPP	TT21	21	24	724	120035	79703.3	16681.4	25.5121	1118.65	213.372	13666.3	251.426	1179.14	798.207	220.299	101.956	133607	70289.7	64508.7	3170.46	2883.12	7924.25	506.93	8220.17	1397.48	-2.51019	-2.21467	1	1	0	0	0	MPP,
1122	export_G8 MPP SC3_VC1.csv	G8	SC3	VC	MPP	MPP	TT21	21	24	725	111033	96148	8231.54	126.803	409.505	451.456	24499.2	221.827	1422.8	231.291	338.906	110.295	156092	137059	41276.3	16785	11144.8	35877.7	-613.485	1454.36	1312.95	-2.08442	0.191079	1	1	0	0	0	ST-HSC,
1123	export_G9 ST-HSC SC3_CF1.csv	G9	SC3	CF	ST-HSC	HSC_SLAM	TT21	21	24	726	147741	130252	28900.8	883.277	215.611	223.221	100.957	-45.0407	74.4728	3888.64	356.513	93.6681	129875	82060	70826.4	135.08	4728.33	28.1791	1836.21	22407.7	89.501	0.471881	-5.27879	1	1	0	0	0	SLAM-HSC,
1124	export_G9 ST-HSC SC3_CV1.csv	G9	SC3	CV	ST-HSC	ckit+SCA1-	TT21	21	24	727	174674	121297	18769.5	646.19	102.454	137.016	12825.4	211.299	79.2828	46.8027	311.624	73.4792	146882	56764.2	66009.3	500.008	8934.73	6967.97	-52.3456	2147.15	36.5515	4.12054	0.976799	1	1	0	0	0	SLAM+MEP,
1125	export_G9 ST-HSC SC3_Vi2.csv.1	G9	SC3	Vi	ST-HSC	MPP	TT21	21	24	728	108321	64663.7	3.8691	99.3058	330.448	276.347	27812	102.716	389.486	1513.3	389	50.3994	146547	130345	-10.71	-54.322	4559.27	48000.6	898.651	9197.36	356.322	-1.34858	-2.48732	1	2	0	0	0	SLAM-HSC,ST-HSC,
1126	export_G9 ST-HSC SC3_Vi2.csv.2	G9	SC3	Vi	ST-HSC	MPP	TT21	21	24	728	116219	61280.1	1.97028	303.631	381.242	245.722	30833.9	-105.149	149.279	3016.57	243.316	141.66	146547	130345	-10.71	-54.322	4559.27	48000.6	898.651	9197.36	356.322	-0.866296	-4.44874	2	2	0	0	0	SLAM-HSC,ST-HSC,
1127	export_H10 ST-HSC SC3_CV2.csv.1	H10	SC3	CV	ST-HSC	HSC_ST	TT21	21	24	729	121747	82304.5	14521	69.5794	157.955	1758.42	7794.1	249.531	1759.6	162.899	312.534	13.6648	144472	93363.8	92145.3	2700.67	5472.18	7254.22	-418.925	1338.56	133.785	-4.1787	3.1057	1	2	0	0	0	ST-HSC,ST-HSC,
1128	export_H10 ST-HSC SC3_CV2.csv.2	H10	SC3	CV	ST-HSC	HSC_ST	TT21	21	24	729	134157	81683.9	13969.9	136.756	130.621	1817.81	7528.52	241.878	1929.09	146.283	279.185	122.292	144472	93363.8	92145.3	2700.67	5472.18	7254.22	-418.925	1338.56	133.785	-4.20517	3.15588	1	2	0	0	0	ST-HSC,ST-HSC,
1129	export_H10 ST-HSC SC3_VC0.csv	H10	SC3	VC	ST-HSC	SLAM+Flt3+	TT21	21	24	730	133253	103968	15952.7	610.87	949.617	669.273	65462.7	151.196	1471.77	1524.16	287.309	82.5022	146257	98260.7	42105.8	4247.28	1988.9	43223.3	417.718	14422	337.904	-2.14348	-4.27702	1	1	0	0	0	SLAM+FLT3+,
1130	export_H10 ST-HSC SC3_Vi1.csv	H10	SC3	Vi	ST-HSC	HSC_ST	TT21	21	24	731	144454	99506.5	2.19627	78.9305	106.962	280.581	31563.4	182.386	1236.28	1940.04	562.893	193.81	127344	109719	57.12	339.738	4700.25	54658.4	1365.32	1898.08	142.118	-0.774498	-2.33313	1	1	0	0	0	ST-HSC,
1131	export_H11 HSC SC3_CV0.csv	H11	SC3	CV	HSC	ckit+SCA1-	TT21	21	24	732	142060	118694	35162.3	456.093	105.939	141.356	23198.6	130.879	457.482	51.5145	440.797	191.683	109747	125837	96341.2	4035.42	3498.37	10074	4823.4	4163.36	340.413	3.80462	1.24649	1	1	0	0	0	SLAM+MEP,
1132	export_H11 HSC SC3_VC1.csv	H11	SC3	VC	HSC	ckit-	TT21	21	24	733	97978.2	65960.1	9846.2	957.865	323.106	327.126	35333.2	-202.029	44.0961	6846.81	103.417	131.753	146891	76227.8	23268.1	1617.87	4386.98	22751.9	6980.65	41610.7	206.705	-0.777751	-4.70249	1	1	0	0	0	SLAM-HSC,
1133	export_H12 HSC SC3_CF1.csv	H12	SC3	CF	HSC	HSC_SLAM	TT21	21	24	734	120742	103112	31594.2	1713.61	145.529	187.167	76.9345	-61.4319	42.2765	7326.32	431.444	208.104	147434	110221	79204	-237.972	3763.57	-34.0927	10336.5	18598.6	250.956	1.10606	-5.80804	1	1	0	0	0	SLAM-HSC,
1134	export_H12 HSC SC3_CV2.csv	H12	SC3	CV	HSC	HSC_SLAM	TT21	21	24	735	94954.4	53007.3	13168.6	953.343	87.7912	69.9592	8805.95	86.8757	19.3391	284.829	359.116	219.345	150183	88755	94230.2	438.041	5425.26	8776.19	5263.94	3318.84	-100.496	3.31752	-1.37605	1	1	0	0	0	SLAM-HSC,
1135	export_H12 HSC SC3_VC2.csv.1	H12	SC3	VC	HSC	ckit+SCA1-	TT21	21	24	736	119389	81505.9	5070.4	800.282	85.8656	77.5666	16267.7	121.643	40.37	15.7856	174.21	72.8112	154356	76026.7	29772.6	620.838	7588.19	23411.3	5917.37	737.598	-21.5282	5.28873	1.57008	1	2	0	0	0	SLAM+MEP,SLAM+MEP,
1136	export_H12 HSC SC3_VC2.csv.2	H12	SC3	VC	HSC	ckit+SCA1-	TT21	21	24	736	110188	69909	5575.85	837.809	91.3544	-1.78072	17844	157.948	37.4536	3.50834	225.474	201.909	154356	76026.7	29772.6	620.838	7588.19	23411.3	5917.37	737.598	-21.5282	5.3436	0.784426	1	2	0	0	0	SLAM+MEP,SLAM+MEP,
1137	export_H2 MPP SC2_CF1.csv	H2	SC2	CF	MPP	HSC_ST	TT21	21	24	737	142928	109853	27001.5	239.87	226.339	153.183	109.926	197.784	1473.14	417.981	634.352	7.77396	152501	95311.9	93046.1	7671.23	8728.62	-31.7737	438.907	4261.71	7002.38	0.656991	-1.11445	1	1	0	0	0	ST-HSC,
1138	export_H2 MPP SC2_VC1.csv	H2	SC2	VC	MPP	MPP	TT21	21	24	738	73826.6	44233.8	7494.71	128.855	1167.89	214.477	25734.3	120.745	617.219	123.385	256.606	8.86843	155703	67687.2	38815.4	2512.12	3504.2	23439.1	62.1207	2530.17	1249.94	-3.19148	-0.379989	1	1	0	0	0	MPP,
1139	export_H3 ST-HSC SC2_VC1.csv	H3	SC2	VC	ST-HSC	MPP	TT21	21	24	739	100338	86189.7	9113.61	4.50287	594.73	284.64	31919.9	104.448	118.884	1045.36	434.2	171.519	129656	87899.4	24086.8	336.133	5062.68	22649.6	757.095	7783.35	276.418	-2.18253	-2.10211	1	1	0	0	0	MPP,
1140	export_H3 ST-HSC SC2_Vi3.csv	H3	SC2	Vi	ST-HSC	SLAM+Flt3+	TT21	21	24	740	120612	68800.3	-1.64918	6349.84	303.176	207549	11996.3	129882	-4576.94	16053.9	4426.45	5.31966	178819	154157	-44.03	5363.5	5607.22	47100	1390.13	698.438	296.658	-5.40775	-5.88532	1	1	0	0	0	SLAM-HSC,
1141	export_H4 ST-HSC SC2_CF0.csv	H4	SC2	CF	ST-HSC	HSC_ST	TT21	21	24	741	125157	96795	36784.9	56.8364	170.972	45.7234	75.2754	40.5308	100.441	933.416	397.561	93.1175	131981	94988.2	106818	28.3487	4614.94	-2.45376	145.916	5935.21	445.141	-0.303373	-1.06368	1	1	0	0	0	ST-HSC,
1142	export_H4 ST-HSC SC2_CV1.csv	H4	SC2	CV	ST-HSC	HSC_ST	TT21	21	24	742	97415.4	66532.6	22786.1	259.197	141.664	55.8502	14714.8	86.1616	60.1368	366.033	389.289	190.08	137840	67456.3	78580.5	327.918	6943.64	7346.08	1302.78	7233.34	28.8183	0.777138	-0.778841	1	1	0	0	0	SLAM-HSC,
1143	export_H4 ST-HSC SC2_VC1.csv	H4	SC2	VC	ST-HSC	HSC_ST	TT21	21	24	743	112621	85752.6	9757.59	268.535	162.973	84.0496	32296.1	157.122	53.316	1029.36	167.947	133.512	143009	84418.6	32552.5	830.983	4238.02	21077.3	2429.41	6534.02	72.2006	0.752351	-2.60022	1	1	0	0	0	SLAM-HSC,
1144	export_H5 HSC SC2_VC2.csv	H5	SC2	VC	HSC	ckit+SCA1-	TT21	21	24	744	113459	53227.6	4472.83	968.756	56.6368	151.91	17500.4	107.069	55.7157	1.03445	160.598	34.9466	109549	123667	19562.4	707.769	2890.62	29113.2	16277.9	770.926	131.505	5.61539	1.11691	1	1	0	0	0	SLAM+MEP,
1145	export_H6 HSC SC2_Vi2.csv	H6	SC2	Vi	HSC	SLAM+Flt3+	TT21	21	24	745	110050	87860.5	10.3645	5704.27	303.255	295.867	27322.6	337.139	2.44925	3102.62	276.344	95.865	179819	124999	5.95	3153.89	2105.86	57737.7	64120.4	32102.4	-232.856	1.43068	-5.74154	1	1	0	0	0	SLAM-HSC,
1146	export_H8 MPP SC3_CF1.csv.1	H8	SC3	CF	MPP	HSC_ST	TT21	21	24	746	101649	66223.2	19321.9	93.768	197.976	134.397	51.2388	58.303	778.298	368.106	385.547	120.086	184832	108533	141520	5993.14	8588.85	-18.5623	2451.49	6831.97	638.402	-0.649056	-0.269329	1	2	0	0	0	SLAM-HSC,ST-HSC,
1147	export_H8 MPP SC3_CF1.csv.2	H8	SC3	CF	MPP	HSC_ST	TT21	21	24	746	113050	73646.5	20703.9	291.362	155.26	121.783	68.8784	148.075	469.012	845.831	281.087	129.43	184832	108533	141520	5993.14	8588.85	-18.5623	2451.49	6831.97	638.402	0.577221	-1.73796	2	2	0	0	0	SLAM-HSC,ST-HSC,
1148	export_H8 MPP SC3_CV1.csv	H8	SC3	CV	MPP	MPP	TT21	21	24	747	119454	79024.5	16748.6	223.414	2412.95	161.791	13076.3	220.735	934.12	437.684	373.764	97.3289	162017	68455.9	61053	9451.45	2215.56	7919.44	784.778	1688.59	4491.69	-2.86216	-2.79397	1	1	0	0	0	MPP,
1149	export_H8 MPP SC3_Vi3.csv	H8	SC3	Vi	MPP	HSC_SLAM	TT21	21	24	748	75431.5	60847.8	-4.72395	13516.4	172.423	207690	14240.3	129973	-4689.54	14937.1	3949.82	130.387	169591	89485.6	8.33	9440.7	4707.63	36203.6	880.718	4166.12	1298.71	-5.38073	-5.86022	1	1	0	0	0	SLAM-HSC,
1150	export_H9 ST-HSC SC3_CF0.csv	H9	SC3	CF	ST-HSC	MPP	TT21	21	24	749	101291	66171.6	51599.7	97.2229	418.52	383.222	64.564	143.885	1278.66	228.05	303.276	96.5516	128898	66844.7	130399	4443.91	4029.49	-20.3521	-1045.09	3712.25	479.526	-2.15477	0.213453	1	1	0	0	0	ST-HSC,
1151	export_H9 ST-HSC SC3_VC1.csv	H9	SC3	VC	ST-HSC	HSC_ST	TT21	21	24	750	122630	93023.8	9159.01	40.3823	276.104	276.492	34234.9	111.131	261.566	906.094	317.564	64.5064	144434	82596.7	25637.4	1374.83	6379.7	20785.9	369.89	3562.69	309.903	-1.30456	-2.30862	1	1	0	0	0	ST-HSC,
1152	export_H9 ST-HSC SC3_Vi1.csv	H9	SC3	Vi	ST-HSC	MPP	TT21	21	24	751	109932	98522.8	1.33973	99.6296	898.199	208.689	49558.2	149.227	1125.79	1721.06	494.729	109.337	159410	77177.5	-24.99	922.527	2946.17	43808.5	479.599	7945.95	144.334	-2.184	-2.67193	1	1	0	0	0	MPP,
1153	export_A1 MPP SC2_CV0.csv	A1	SC2	CV	MPP	MPP	TT21	21	48	752	111946	98385.8	16920	144.272	1236.79	440.498	12334.6	83.3471	229.611	243.589	926.885	141.601	144517	107346	90694.7	2499	4395.68	8989.94	1989.16	11689.3	2461.46	-3.72339	-0.395039	1	1	0	0	0	MPP,
1154	export_A1 MPP SC2_Vi2.csv.1	A1	SC2	Vi	MPP	ckit+SCA1-	TT21	21	48	753	127866	79608	1.91852	50.8527	158.832	1117.99	6766.25	310.956	885.843	-26.6897	647.518	141.015	178618	86363.1	74.97	2681.46	6333.88	35773	13.9909	596.964	659.997	-2.91569	3.33709	1	2	0	0	0	GMP,GMP,
1155	export_A1 MPP SC2_Vi2.csv.2	A1	SC2	Vi	MPP	ckit+SCA1-	TT21	21	48	753	113016	110960	2.25135	71.8855	495.782	1848.58	7573.93	314.322	903.72	-19.1358	553.404	147.182	178618	86363.1	74.97	2681.46	6333.88	35773	13.9909	596.964	659.997	-3.70179	2.86354	1	2	0	0	0	GMP,GMP,
1156	export_A10 ST-HSC SC3_CF2.csv.1	A10	SC3	CF	ST-HSC	HSC_ST	TT21	21	48	754	166534	119164	6187.6	149.223	138.925	226.236	92.7885	286.317	2811.1	279.324	577.778	26.9516	142494	86728.4	117911	1006.21	6753.02	-37.7266	555.386	1962.44	287.4	-0.377009	0.539207	1	3	0	0	0	ST-HSC,ST-HSC,
1157	export_A10 ST-HSC SC3_CF2.csv.2	A10	SC3	CF	ST-HSC	HSC_ST	TT21	21	48	754	141290	112729	5804.89	55.5	94.2321	315.814	112.617	358.203	3506.43	325.721	505.291	191.231	142494	86728.4	117911	1006.21	6753.02	-37.7266	555.386	1962.44	287.4	-1.22531	0.316572	1	3	0	0	0	ST-HSC,ST-HSC,ST-HSC,
1158	export_A10 ST-HSC SC3_CF2.csv.3	A10	SC3	CF	ST-HSC	HSC_ST	TT21	21	48	754	140538	83065.2	5571.73	155.42	147.633	239.435	114.226	341.591	3573.94	136.053	607.334	203.145	142494	86728.4	117911	1006.21	6753.02	-37.7266	555.386	1962.44	287.4	-0.429369	0.989698	1	3	0	0	0	ST-HSC,ST-HSC,ST-HSC,
1159	export_A11 HSC SC3_CV2.csv.1	A11	SC3	CV	HSC	HSC_ST	TT21	21	48	755	102483	74650.8	5568.52	156.995	98.5415	76.1357	4796.65	96.8561	330.527	201.283	527.391	89.2787	137090	84334.1	93210.3	1544.49	6504.69	11512.7	8349.36	7274.29	221.991	0.786328	0.283393	1	4	0	0	0	SLAM-HSC,ST-HSC,
1160	export_A11 HSC SC3_CV2.csv.2	A11	SC3	CV	HSC	HSC_ST	TT21	21	48	755	124249	106634	5990.55	225.558	182.251	120.184	5061.41	118.754	392.697	82.8329	440.67	125.649	137090	84334.1	93210.3	1544.49	6504.69	11512.7	8349.36	7274.29	221.991	2.64644	1.94079	2	4	0	0	0	SLAM-HSC,SLAM-HSC,ST-HSC,
1161	export_A11 HSC SC3_CV2.csv.3	A11	SC3	CV	HSC	HSC_SLAM	TT21	21	48	755	119545	58332.1	5584.56	264.846	90.813	125.339	4923.72	27.68	239.544	672.742	408.022	138.825	137090	84334.1	93210.3	1544.49	6504.69	11512.7	8349.36	7274.29	221.991	0.481543	-1.39598	2	4	0	0	0	SLAM-HSC,SLAM-HSC,SLAM-HSC,ST-HSC,
1162	export_A11 HSC SC3_CV2.csv.4	A11	SC3	CV	HSC	HSC_SLAM	TT21	21	48	755	93918.3	66042.9	5327.62	332.532	142.937	111.932	4675.4	70.6191	196.927	670.176	334.902	199.77	137090	84334.1	93210.3	1544.49	6504.69	11512.7	8349.36	7274.29	221.991	0.760583	-1.68231	2	4	0	0	0	SLAM-HSC,SLAM-HSC,SLAM-HSC,ST-HSC,
1163	export_A11 HSC SC3_VC3.csv.1	A11	SC3	VC	HSC	ckit+SCA1-	TT21	21	48	756	99062.4	58765.4	959.643	556.103	117.266	123.998	3040.02	222.55	1280.76	55.7909	345.344	8.78594	127167	70100.5	30246.2	12836.3	6071.58	21414.5	4930	3050.01	357.582	3.93673	0.989748	1	7	0	0	0	SLAM+MEP,SLAM+MEP,
1164	export_A11 HSC SC3_VC3.csv.2	A11	SC3	VC	HSC	ckit+SCA1-	TT21	21	48	756	131802	76438.2	1087.42	1599.37	87.7165	219.306	3636.77	352.511	2543.58	1.49434	370.603	25.5164	127167	70100.5	30246.2	12836.3	6071.58	21414.5	4930	3050.01	357.582	4.97333	0.419976	1	7	0	0	0	SLAM+MEP,SLAM+MEP,SLAM+MEP,
1165	export_A11 HSC SC3_VC3.csv.3	A11	SC3	VC	HSC	ckit+SCA1-	TT21	21	48	756	110230	71415.6	960.286	257.153	149.855	123.598	3048.97	333.005	2219.42	21.757	283.927	118.87	127167	70100.5	30246.2	12836.3	6071.58	21414.5	4930	3050.01	357.582	3.27872	2.69138	1	7	0	0	0	SLAM+MEP,SLAM+MEP,SLAM+MEP,SLAM+MEP,
1166	export_A11 HSC SC3_VC3.csv.4	A11	SC3	VC	HSC	ckit+SCA1-	TT21	21	48	756	115994	63410.6	957.674	316.777	133.248	151.761	3134.63	283.828	1820.01	52.7149	246.811	133.777	127167	70100.5	30246.2	12836.3	6071.58	21414.5	4930	3050.01	357.582	3.46121	2.44986	1	7	0	0	0	SLAM+MEP,SLAM+MEP,SLAM+MEP,SLAM+MEP,SLAM+MEP,
1167	export_A11 HSC SC3_VC3.csv.5	A11	SC3	VC	HSC	ckit+SCA1-	TT21	21	48	756	93019.3	52443.8	900.166	370.806	111.044	154.631	2921.99	167.627	1253	20.0796	231.944	203.191	127167	70100.5	30246.2	12836.3	6071.58	21414.5	4930	3050.01	357.582	3.69345	2.41958	1	7	0	0	0	SLAM+MEP,SLAM+MEP,SLAM+MEP,SLAM+MEP,SLAM+MEP,SLAM+MEP,
1168	export_A11 HSC SC3_VC3.csv.6	A11	SC3	VC	HSC	ckit+SCA1-	TT21	21	48	756	135340	62616	1144.48	1213.8	124.036	130.463	3663.92	271.222	1884.55	-11.8507	264.747	203.79	127167	70100.5	30246.2	12836.3	6071.58	21414.5	4930	3050.01	357.582	5.40958	0.640742	1	7	0	0	0	SLAM+MEP,SLAM+MEP,SLAM+MEP,SLAM+MEP,SLAM+MEP,SLAM+MEP,SLAM+MEP,
1169	export_A11 HSC SC3_VC3.csv.7	A11	SC3	VC	HSC	ckit+SCA1-	TT21	21	48	756	133893	73754.1	1012.14	292.114	100.62	137.297	3215.09	307.663	2137.89	25.8042	280.496	210.395	127167	70100.5	30246.2	12836.3	6071.58	21414.5	4930	3050.01	357.582	3.44382	2.42279	1	7	0	0	0	SLAM+MEP,SLAM+MEP,SLAM+MEP,SLAM+MEP,SLAM+MEP,SLAM+MEP,SLAM+MEP,
1170	export_A11 HSC SC3_Vi1.csv	A11	SC3	Vi	HSC	HSC_SLAM	TT21	21	48	757	101953	46360	9.64754	11387.6	242.705	207631	18954.2	126358	-4572.91	32535.7	6888.42	186.08	241824	151096	-20.23	4416.75	2303.92	51702.5	26209.6	2333.57	-85.5576	-5.3223	-5.80297	1	1	0	0	0	SLAM-HSC,
1171	export_A12 HSC SC3_Vi3.csv.1	A12	SC3	Vi	HSC	ckit-	TT21	21	48	758	118929	76435.1	1.63674	386.139	112.526	122.033	5558.02	61.053	121.362	47.1431	96.1032	87.251	176656	98059.6	-21.42	1417.29	7222.82	50268.6	23971	2530.06	-133.874	4.12452	3.06258	1	4	0	0	0	SLAM-HSC,ckit-,
1172	export_A12 HSC SC3_Vi3.csv.2	A12	SC3	Vi	HSC	ckit-	TT21	21	48	758	169262	83523.3	1.72389	2569.91	84.3454	170.985	5397.85	229.861	82.2247	104.86	119.51	205.745	176656	98059.6	-21.42	1417.29	7222.82	50268.6	23971	2530.06	-133.874	4.97159	-0.372608	2	4	0	0	0	SLAM+MEP,SLAM-HSC,ckit-,
1173	export_A12 HSC SC3_Vi3.csv.3	A12	SC3	Vi	HSC	ckit+SCA1-	TT21	21	48	758	103120	62975.5	1.16166	558.555	95.7982	142.42	5834.59	61.3481	112.664	67.4798	482.875	212.092	176656	98059.6	-21.42	1417.29	7222.82	50268.6	23971	2530.06	-133.874	3.82169	1.12533	3	4	0	0	0	SLAM-HSC,SLAM+MEP,SLAM-HSC,ckit-,
1174	export_A12 HSC SC3_Vi3.csv.4	A12	SC3	Vi	HSC	HSC_SLAM	TT21	21	48	758	138709	78797.7	1.0368	668.043	88.1907	92.1641	5657.36	154.533	99.128	134.021	210.447	212.495	176656	98059.6	-21.42	1417.29	7222.82	50268.6	23971	2530.06	-133.874	3.43423	-0.173559	4	4	0	0	0	SLAM-HSC,SLAM+MEP,SLAM-HSC,ckit-,
1175	export_A2 MPP SC2_CV1.csv.1	A2	SC2	CV	MPP	ckit+SCA1-	TT21	21	48	759	148226	67723.9	9389.41	70.7419	303.054	1422.5	8034.22	364.291	1309.55	-10.2726	764.94	83.7363	153434	90543.5	96769.6	3067.22	5300.01	10769.4	-413.058	2074.79	1280.79	-3.55037	2.974	1	2	0	0	0	GMP,GMP,
1176	export_A2 MPP SC2_CV1.csv.2	A2	SC2	CV	MPP	ckit+SCA1-	TT21	21	48	759	99789.4	62073.5	8886.24	50.0538	150.611	1198.47	7204.37	47.873	918.882	36.0897	558.433	203.803	153434	90543.5	96769.6	3067.22	5300.01	10769.4	-413.058	2074.79	1280.79	-3.29579	3.09565	1	2	0	0	0	GMP,GMP,
1177	export_A2 MPP SC2_Vi1.csv	A2	SC2	Vi	MPP	MPP	TT21	21	48	760	135564	65618.4	12.5868	-15.3482	1257.41	549.878	18903.4	174.699	1057.8	339.027	783.314	41.1781	188183	107615	19.04	22592.8	6289.95	44651.6	-371.027	11398.5	4875.45	-3.01799	-1.42558	1	1	0	0	0	MPP,
1178	export_A3 ST-HSC SC2_CF2.csv	A3	SC2	CF	ST-HSC	ckit+SCA1-	TT21	21	48	761	110797	106304	5269.31	85.1341	155.118	222.509	74.832	195.853	1287.79	3.31301	607.253	152.616	167709	107345	135384	1558.56	5969.84	-2.72791	62.9889	1574.04	452.529	-0.724668	3.59391	1	1	0	0	0	MEP,
1179	export_A3 ST-HSC SC2_CV3.csv.1	A3	SC2	CV	ST-HSC	ckit+SCA1-	TT21	21	48	762	91513.4	48402.4	2847.75	82.9773	85.1435	680.258	2555.08	165.87	1019.5	41.1449	370.2	31.3555	138263	67928.8	67122	9968.21	4501.63	7353.19	618.55	1005.15	-90.4972	-2.84453	3.04433	1	3	0	0	0	GMP,GMP,
1180	export_A3 ST-HSC SC2_CV3.csv.2	A3	SC2	CV	ST-HSC	ckit+SCA1-	TT21	21	48	762	81755.6	64031.4	2983.51	82.0384	108.651	594.467	2582.02	274.048	1467.28	58.6108	430.088	85.1534	138263	67928.8	67122	9968.21	4501.63	7353.19	618.55	1005.15	-90.4972	-2.78746	2.81483	1	3	0	0	0	GMP,GMP,GMP,
1181	export_A3 ST-HSC SC2_CV3.csv.3	A3	SC2	CV	ST-HSC	ckit+SCA1-	TT21	21	48	762	103377	56202.4	2959.65	67.4665	107.265	1101.68	2718.48	101.164	961.079	48.2684	436.042	200.153	138263	67928.8	67122	9968.21	4501.63	7353.19	618.55	1005.15	-90.4972	-3.2307	3.06172	1	3	0	0	0	GMP,GMP,GMP,
1182	export_A3 ST-HSC SC2_VC1.csv.1	A3	SC2	VC	ST-HSC	ckit+SCA1-	TT21	21	48	763	103837	73323.6	2712.82	68.1756	146.277	738.029	11237.2	202.966	426.839	-27.5362	747.291	44.1904	141085	127437	28771.8	2554.31	6869.27	28367.3	28.9094	501.786	293.866	-2.69658	3.3698	1	2	0	0	0	GMP,GMP,
1183	export_A3 ST-HSC SC2_VC1.csv.2	A3	SC2	VC	ST-HSC	ckit+SCA1-	TT21	21	48	763	112923	62239.2	3060.2	73.1912	86.3102	1030.44	13104	18.8357	563.625	27.0435	609.497	211.452	141085	127437	28771.8	2554.31	6869.27	28367.3	28.9094	501.786	293.866	-3.18849	3.15343	1	2	0	0	0	GMP,GMP,
1184	export_A3 ST-HSC SC2_Vi3.csv.1	A3	SC2	Vi	ST-HSC	ckit+SCA1-	TT21	21	48	764	82766.8	53374	0.430396	50.682	81.3912	213.159	4004.51	37.6949	427.005	37.0307	355.032	6.31805	204819	103563	-4.76	11406	8836.81	41723.4	1260.96	1757.78	130.162	-0.443636	3.4626	1	5	0	0	0	MEP,MEP,
1185	export_A3 ST-HSC SC2_Vi3.csv.2	A3	SC2	Vi	ST-HSC	ckit+SCA1-	TT21	21	48	764	102772	64533.8	1.41926	79.0285	70.0307	194.36	4804.23	174.199	682.809	-4.57649	924.545	20.4081	204819	103563	-4.76	11406	8836.81	41723.4	1260.96	1757.78	130.162	-0.361846	3.72344	1	5	0	0	0	GMP,MEP,MEP,
1186	export_A3 ST-HSC SC2_Vi3.csv.3	A3	SC2	Vi	ST-HSC	ckit+SCA1-	TT21	21	48	764	94375.8	48040.2	1.49639	51.7458	67.7523	321.908	3958.05	148.368	497.9	11.0498	597.561	32.4685	204819	103563	-4.76	11406	8836.81	41723.4	1260.96	1757.78	130.162	-1.49858	3.46029	2	5	0	0	0	MEP,GMP,MEP,MEP,
1187	export_A3 ST-HSC SC2_Vi3.csv.4	A3	SC2	Vi	ST-HSC	ckit+SCA1-	TT21	21	48	764	91240.3	46389.7	1.48851	96.6219	66.7857	255.174	4106.82	153.788	385.055	-3.84301	629.383	104.81	204819	103563	-4.76	11406	8836.81	41723.4	1260.96	1757.78	130.162	-0.630696	3.80546	3	5	0	0	0	MEP,MEP,GMP,MEP,MEP,
1188	export_A3 ST-HSC SC2_Vi3.csv.5	A3	SC2	Vi	ST-HSC	ckit+SCA1-	TT21	21	48	764	94936.4	63135.7	1.99031	141.032	110.511	225.421	3766.44	166.629	678.619	-1.14009	487.891	161.354	204819	103563	-4.76	11406	8836.81	41723.4	1260.96	1757.78	130.162	-0.385379	3.78659	3	5	0	0	0	MEP,MEP,GMP,MEP,MEP,
1189	export_A4 ST-HSC SC2_CF1.csv	A4	SC2	CF	ST-HSC	ckit+SCA1-	TT21	21	48	765	134141	81154.1	6837.61	94.7585	130.716	296.849	88.1424	226.495	1395.03	-6.70644	558.071	30.227	137710	68372.6	81064	1716.44	7128.14	-6.15001	193.461	524.99	46.0641	-1.00225	3.7507	1	1	0	0	0	MEP,
1190	export_A4 ST-HSC SC2_VC2.csv.1	A4	SC2	VC	ST-HSC	ckit+SCA1-	TT21	21	48	766	80847.8	49518.7	1230.99	49.2094	164.12	194.213	5257.28	92.6108	456.721	8.57889	426.068	2.44504	149589	78513.8	25889.6	4892.53	4228.95	21837.5	742.258	3279.2	157.513	-0.511509	3.28827	1	3	0	0	0	MEP,MEP,
1191	export_A4 ST-HSC SC2_VC2.csv.2	A4	SC2	VC	ST-HSC	ckit+SCA1-	TT21	21	48	766	96783.2	52634	1221.55	87.1731	76.8648	245.698	5808.6	118.247	524.985	44.1641	390.798	75.3951	149589	78513.8	25889.6	4892.53	4228.95	21837.5	742.258	3279.2	157.513	-0.386576	3.42769	1	3	0	0	0	MEP,MEP,MEP,
1192	export_A4 ST-HSC SC2_VC2.csv.3	A4	SC2	VC	ST-HSC	ckit+SCA1-	TT21	21	48	766	77730.7	55774.1	1198.77	105.786	110.487	103.094	5368.84	102.594	378.711	20.7023	412.395	124.082	149589	78513.8	25889.6	4892.53	4228.95	21837.5	742.258	3279.2	157.513	1.03007	3.18597	1	3	0	0	0	MEP,MEP,MEP,
1193	export_A5 HSC SC2_CV2.csv.1	A5	SC2	CV	HSC	HSC_SLAM	TT21	21	48	767	94239.5	79590.6	3848.13	343.846	74.8614	102.444	3016.15	110.525	48.0634	647.84	241.514	78.8015	220569	137989	115488	1043.26	3733.58	13041.8	11856.5	11012.7	158.748	0.562183	-1.61446	1	2	0	0	0	SLAM-HSC,SLAM-HSC,
1194	export_A5 HSC SC2_CV2.csv.2	A5	SC2	CV	HSC	HSC_SLAM	TT21	21	48	767	104679	47604.2	3727.89	577.528	121.077	91.3461	3067.48	-44.2067	69.2177	958.433	336.118	151.985	220569	137989	115488	1043.26	3733.58	13041.8	11856.5	11012.7	158.748	1.31726	-3.3838	1	2	0	0	0	SLAM-HSC,SLAM-HSC,
1195	export_A5 HSC SC2_VC2.csv.1	A5	SC2	VC	HSC	HSC_SLAM	TT21	21	48	768	89789.1	50428.1	1451.15	270.218	101.872	67.2802	5698.77	98.5014	141.059	126.232	251.796	62.2086	146866	91292	20967.8	583.406	4323.68	19365	7136.38	5938.42	1.10474	1.74778	0.0619361	1	4	0	0	0	SLAM-HSC,SLAM-HSC,
1196	export_A5 HSC SC2_VC2.csv.2	A5	SC2	VC	HSC	HSC_SLAM	TT21	21	48	768	102920	54134.5	1411.53	309.458	80.0802	117.718	5877.79	44.0688	68.6748	393.675	460.987	134.94	146866	91292	20967.8	583.406	4323.68	19365	7136.38	5938.42	1.10474	0.699416	-0.855156	1	4	0	0	0	SLAM-HSC,SLAM-HSC,SLAM-HSC,
1197	export_A5 HSC SC2_VC2.csv.3	A5	SC2	VC	HSC	HSC_ST	TT21	21	48	768	99982	44022.2	1289.24	242.742	90.1226	106.812	5282.01	82.315	204.317	124.133	286.146	198.743	146866	91292	20967.8	583.406	4323.68	19365	7136.38	5938.42	1.10474	1.66764	0.13488	1	4	0	0	0	SLAM-HSC,SLAM-HSC,SLAM-HSC,SLAM-HSC,
1198	export_A5 HSC SC2_VC2.csv.4	A5	SC2	VC	HSC	HSC_SLAM	TT21	21	48	768	91318	42282	1280.79	324.093	69.7591	214.152	5118.17	48.1378	58.5496	376.755	450.238	212.35	146866	91292	20967.8	583.406	4323.68	19365	7136.38	5938.42	1.10474	0.670601	-0.986259	1	4	0	0	0	SLAM-HSC,SLAM-HSC,SLAM-HSC,SLAM-HSC,
1199	export_A5 HSC SC2_Vi1.csv.1	A5	SC2	Vi	HSC	ckit+SCA1-	TT21	21	48	769	144042	89765.5	6.08778	1204.74	73.0678	284.414	15985.4	148.969	165.001	-18.147	204.697	102.221	115920	81961.3	-21.42	1437.36	6866.93	38650.4	9573.55	913.153	49.7226	5.7046	1.10122	1	2	0	0	0	GMP,SLAM+MEP,
1200	export_A5 HSC SC2_Vi1.csv.2	A5	SC2	Vi	HSC	ckit+SCA1-	TT21	21	48	769	154512	144632	1.70993	612.405	90.2055	303.836	14927	72.6128	222.249	6.58412	388.617	158.007	115920	81961.3	-21.42	1437.36	6866.93	38650.4	9573.55	913.153	49.7226	4.00545	1.28862	2	2	0	0	0	GMP,SLAM+MEP,
1201	export_A6 HSC SC2_CF2.csv	A6	SC2	CF	HSC	ckit+SCA1-	TT21	21	48	770	126222	78260.5	7059.12	342.733	123.841	121.076	93.731	205.268	57.0314	56.5254	580.372	166.139	158816	128257	134906	1752.03	8398.89	-12.2172	4005.73	4179.04	261.493	2.83234	1.85537	1	6	0	0	0	SLAM+MEP,SLAM+MEP,
1202	export_A6 HSC SC2_CF3.csv.1	A6	SC2	CF	HSC	ckit+SCA1-	TT21	21	48	770	91939.8	49641.3	3225.44	317.469	59.9305	111.656	56.4001	125.868	437.656	52.6059	507.646	1.43739	158816	128257	134906	1752.03	8398.89	-12.2172	4005.73	4179.04	261.493	2.71263	2.14964	1	6	0	0	0	SLAM-HSC,SLAM+MEP,SLAM+MEP,
1203	export_A6 HSC SC2_CF3.csv.2	A6	SC2	CF	HSC	HSC_SLAM	TT21	21	48	770	86265.7	49816.7	3548.77	275.127	80.7213	117.542	21.0698	66.8206	58.5085	91.0107	417.02	7.79315	158816	128257	134906	1752.03	8398.89	-12.2172	4005.73	4179.04	261.493	2.71313	1.75981	2	6	0	0	0	SLAM-HSC,SLAM-HSC,SLAM+MEP,SLAM+MEP,
1204	export_A6 HSC SC2_CF3.csv.3	A6	SC2	CF	HSC	HSC_SLAM	TT21	21	48	770	107052	46367.3	3783.18	273.888	67.6639	210.713	36.2581	41.5835	78.5466	98.105	398.875	23.6094	158816	128257	134906	1752.03	8398.89	-12.2172	4005.73	4179.04	261.493	2.8277	1.33962	2	6	0	0	0	SLAM-HSC,SLAM-HSC,SLAM-HSC,SLAM+MEP,SLAM+MEP,
1205	export_A6 HSC SC2_CF3.csv.4	A6	SC2	CF	HSC	HSC_SLAM	TT21	21	48	770	106448	56558.6	3704.21	524.734	79.3107	181.427	53.4672	79.8586	323.718	85.8863	544.371	166.488	158816	128257	134906	1752.03	8398.89	-12.2172	4005.73	4179.04	261.493	3.65149	1.108	2	6	0	0	0	SLAM+MEP,SLAM-HSC,SLAM-HSC,SLAM-HSC,SLAM+MEP,SLAM+MEP,
1206	export_A6 HSC SC2_CF3.csv.5	A6	SC2	CF	HSC	ckit+SCA1-	TT21	21	48	770	121699	77303.6	4007.59	271.418	110.128	174.785	48.1212	173.464	530.17	78.6803	517.429	202.329	158816	128257	134906	1752.03	8398.89	-12.2172	4005.73	4179.04	261.493	2.75367	1.70645	3	6	0	0	0	SLAM+MEP,SLAM-HSC,SLAM-HSC,SLAM-HSC,SLAM+MEP,SLAM+MEP,
1207	export_A6 HSC SC2_CV2.csv.1	A6	SC2	CV	HSC	ckit+SCA1-	TT21	21	48	771	102006	66734	4198.46	905.236	44.8427	114.761	3793.93	30.5768	40.8617	42.8438	633.503	186.264	133344	123609	64267.1	70.3054	6164.98	10130.6	9562.67	698.274	41.1955	4.65713	0.83806	1	2	0	0	0	SLAM+MEP,SLAM+MEP,
1208	export_A6 HSC SC2_CV2.csv.2	A6	SC2	CV	HSC	ckit+SCA1-	TT21	21	48	771	142079	72385	4840.79	635.009	63.0506	88.0543	4086.25	113.587	79.5176	-21.3878	218.716	211.416	133344	123609	64267.1	70.3054	6164.98	10130.6	9562.67	698.274	41.1955	4.88803	2.2175	1	2	0	0	0	SLAM+MEP,SLAM+MEP,
1209	export_A6 HSC SC2_Vi1.csv	A6	SC2	Vi	HSC	ckit+SCA1-	TT21	21	48	772	142481	64335.7	0.964635	452.254	106.548	211.845	19650.1	213.03	831.869	-14.7832	272.544	51.8312	126485	116890	-4.76	2983.35	4496.66	49669.1	6123.74	576.1	-73.8999	3.97613	2.03274	1	1	0	0	0	SLAM+MEP,
1210	export_A7 MPP SC3_VC2.csv.1	A7	SC3	VC	MPP	SLAM+Flt3+	TT21	21	48	773	162119	93401.3	2167.25	474.905	1191.52	1196.48	7510.56	292.137	2020.46	2794.7	482.23	3.93566	171212	105991	39439	1797.49	3878.11	22778.9	-607.068	10251.7	1746.97	-2.20393	-4.26227	1	3	0	0	0	SLAM+FLT3+,SLAM+FLT3+,
1211	export_A7 MPP SC3_VC2.csv.2	A7	SC3	VC	MPP	SLAM+Flt3+	TT21	21	48	773	152544	113081	2190.47	816.56	1326.14	310.39	7427.87	387.127	2683.09	3027.89	393.782	25.3892	171212	105991	39439	1797.49	3878.11	22778.9	-607.068	10251.7	1746.97	-1.94875	-4.45186	1	3	0	0	0	SLAM+FLT3+,SLAM+FLT3+,SLAM+FLT3+,
1212	export_A7 MPP SC3_VC2.csv.3	A7	SC3	VC	MPP	SLAM+Flt3+	TT21	21	48	773	141279	102470	1800.44	544.365	1483.38	428.432	6372.13	192.434	1739.95	2779.61	377.624	65.2728	171212	105991	39439	1797.49	3878.11	22778.9	-607.068	10251.7	1746.97	-1.98707	-4.38952	1	3	0	0	0	SLAM+FLT3+,SLAM+FLT3+,SLAM+FLT3+,
1213	export_A7 MPP SC3_Vi3.csv.1	A7	SC3	Vi	MPP	MPP	TT21	21	48	774	137058	97816.4	5.35778	82.6443	537.026	10246.7	4593.8	526.582	2284.01	261.27	305.618	26.2563	188934	143513	-9.52	10099.9	4033.34	42314.7	-229.878	7719.72	1860.31	-5.32941	2.93382	1	5	0	0	0	MPP,MPP,
1214	export_A7 MPP SC3_Vi3.csv.2	A7	SC3	Vi	MPP	MPP	TT21	21	48	774	165411	106885	1.01269	151.018	338.615	8564.4	4695.14	382.512	2038.6	267.381	258.894	56.4371	188934	143513	-9.52	10099.9	4033.34	42314.7	-229.878	7719.72	1860.31	-5.42085	2.86825	1	5	0	0	0	SLAM+FLT3+,MPP,MPP,
1215	export_A7 MPP SC3_Vi3.csv.3	A7	SC3	Vi	MPP	SLAM+Flt3+	TT21	21	48	774	117212	108894	0.419375	566.083	318.543	7442.27	4927.98	149.367	1394.48	351.077	219.316	93.945	188934	143513	-9.52	10099.9	4033.34	42314.7	-229.878	7719.72	1860.31	-5.38409	2.79266	2	5	0	0	0	MPP,SLAM+FLT3+,MPP,MPP,
1216	export_A7 MPP SC3_Vi3.csv.4	A7	SC3	Vi	MPP	ckit-	TT21	21	48	774	100900	76296.8	8.08352	114.476	268.217	3349.07	4512.68	313.017	1306.24	515.123	127.216	126.577	188934	143513	-9.52	10099.9	4033.34	42314.7	-229.878	7719.72	1860.31	-5.5188	2.92382	3	5	0	0	0	MPP,MPP,SLAM+FLT3+,MPP,MPP,
1217	export_A7 MPP SC3_Vi3.csv.5	A7	SC3	Vi	MPP	ckit-	TT21	21	48	774	108898	84091.3	4.79862	174.544	369.509	5869.27	4376.33	473.773	2791.34	380.998	155.343	176.793	188934	143513	-9.52	10099.9	4033.34	42314.7	-229.878	7719.72	1860.31	-5.40844	2.82161	3	5	0	0	0	MPP,MPP,SLAM+FLT3+,MPP,MPP,
1218	export_A8 MPP SC3_CF3.csv.1	A8	SC3	CF	MPP	ckit+SCA1-	TT21	21	48	775	97319.7	106125	1393.48	225.754	136.589	16811.3	129.219	216.938	1199.55	-81.428	263.59	32.436	149031	83366.6	116299	3827.73	5249.94	-30.263	-553.237	570.662	723.567	-6.81908	4.10335	1	2	0	0	0	GMP,GMP,
1219	export_A8 MPP SC3_CF3.csv.2	A8	SC3	CF	MPP	ckit+SCA1-	TT21	21	48	775	100467	104472	1479.67	82.765	146.797	15322.4	113.279	-114.466	1179.3	-7.21425	274.528	209.353	149031	83366.6	116299	3827.73	5249.94	-30.263	-553.237	570.662	723.567	-6.28522	3.90611	1	2	0	0	0	GMP,GMP,
1220	export_A8 MPP SC3_CV4.csv	A8	SC3	CV	MPP	ckit+SCA1-	TT21	21	48	776	113764	82995.3	942.337	118.847	158.12	15012	716.771	1342.85	1557.79	-100.367	277.154	88.8743	149901	74171.5	76091	2817.94	3735.47	7319.72	-72.1757	632.899	6239.17	-6.85906	4.18044	1	1	0	0	0	GMP,
1221	export_A8 MPP SC3_Vi2.csv.1	A8	SC3	Vi	MPP	HSC_ST	TT21	21	48	777	112659	74802.5	0.937069	-43.054	212.853	301	9953.59	218.383	1557.14	4900.68	405.95	107.71	137440	122115	8.33	2713.99	3120.96	52761.5	291.55	34813.7	1102.2	-1.05759	-2.88235	1	3	0	0	0	ST-HSC,ST-HSC,
1222	export_A8 MPP SC3_Vi2.csv.2	A8	SC3	Vi	MPP	ckit-	TT21	21	48	777	127710	82309.5	1.72388	80.0556	164.356	288.44	9225.93	75.803	1437.77	4946.45	169.908	114.32	137440	122115	8.33	2713.99	3120.96	52761.5	291.55	34813.7	1102.2	-0.737658	-3.32415	1	3	0	0	0	SLAM-HSC,ST-HSC,ST-HSC,
1223	export_A8 MPP SC3_Vi2.csv.3	A8	SC3	Vi	MPP	ckit-	TT21	21	48	777	134507	80985.2	1.60288	313.95	239.931	319.671	10698	140.226	1681.83	4296.45	152.712	204.306	137440	122115	8.33	2713.99	3120.96	52761.5	291.55	34813.7	1102.2	-0.445435	-4.38457	2	3	0	0	0	SLAM-HSC,ST-HSC,ST-HSC,
1224	export_A9 ST-HSC SC3_CF3.csv.1	A9	SC3	CF	ST-HSC	ckit-	TT21	21	48	778	96955.3	78644.2	1987.47	279.49	249.095	2592.18	83.7356	237.667	1970.98	11.3288	145.424	64.4028	142290	81950.5	85948.9	4320.32	3443.54	-22.3971	-92.3604	668.353	382.712	-4.27494	3.70542	1	3	0	0	0	GMP,MyP,
1225	export_A9 ST-HSC SC3_CF3.csv.2	A9	SC3	CF	ST-HSC	ckit+SCA1-	TT21	21	48	778	81959.2	75804.1	1859.42	143.164	204.41	2854.34	104.057	208.32	2279.18	-5.49956	262.438	95.8968	142290	81950.5	85948.9	4320.32	3443.54	-22.3971	-92.3604	668.353	382.712	-4.67931	3.68105	2	3	0	0	0	GMP,GMP,MyP,
1226	export_A9 ST-HSC SC3_CF3.csv.3	A9	SC3	CF	ST-HSC	ckit+SCA1-	TT21	21	48	778	122276	93616.2	1967.93	194.739	210.731	6322.17	118.587	442.274	2911.51	-10.6828	264.373	205.595	142290	81950.5	85948.9	4320.32	3443.54	-22.3971	-92.3604	668.353	382.712	-5.2232	3.77921	2	3	0	0	0	GMP,GMP,MyP,
1227	export_A9 ST-HSC SC3_CV1.csv.1	A9	SC3	CV	ST-HSC	ckit-	TT21	21	48	779	152425	133436	7725.98	287.997	726.099	1050.51	5605.08	216.777	2023.35	2983.86	162.108	29.3749	145718	81772	79985.9	606.74	3184.93	7676.09	-406.184	20240.3	310.262	-2.03425	-4.21683	1	2	0	0	0	SLAM+FLT3+,SLAM+FLT3+,
1228	export_A9 ST-HSC SC3_CV1.csv.2	A9	SC3	CV	ST-HSC	ckit-	TT21	21	48	779	155974	116642	8172.63	671.988	518.903	524.489	5797.5	283.745	1829.69	3622.62	166.907	50.0596	145718	81772	79985.9	606.74	3184.93	7676.09	-406.184	20240.3	310.262	-1.24366	-4.54712	1	2	0	0	0	SLAM+FLT3+,SLAM+FLT3+,
1229	export_A9 ST-HSC SC3_VC2.csv	A9	SC3	VC	ST-HSC	HSC_ST	TT21	21	48	780	107995	69486.8	2493.53	105.822	149.607	2766.36	6746.21	194.388	2214.2	118.443	350.342	93.8347	124729	79137.4	33070.1	1319.24	3599.64	19368.7	-28.476	645.963	362.938	-4.48128	3.20638	1	1	0	0	0	ST-HSC,
1230	export_A9 ST-HSC SC3_Vi3.csv.1	A9	SC3	Vi	ST-HSC	ckit-	TT21	21	48	781	85691	76332.3	2.03939	85.9906	124.998	3114.84	3451.43	368.321	1471	4.06122	182.369	17.0503	240966	226730	5.95	2898.39	4615.74	62145.7	588.175	674.094	227.017	-4.81019	3.82771	1	2	0	0	0	GMP,GMP,
1231	export_A9 ST-HSC SC3_Vi3.csv.2	A9	SC3	Vi	ST-HSC	ckit+SCA1-	TT21	21	48	781	86925	88893.8	2.17334	101.716	186.704	4317.41	3482.04	380.858	1351.28	61.5427	304.741	38.0763	240966	226730	5.95	2898.39	4615.74	62145.7	588.175	674.094	227.017	-4.68318	3.41649	1	2	0	0	0	GMP,GMP,
1232	export_B1 MPP SC2_CV0.csv	B1	SC2	CV	MPP	ckit+SCA1-	TT21	21	48	782	124978	96685.6	14851.7	144.432	497.295	1124.57	11842.1	230.131	1003.89	52.4407	631.17	149.184	147822	82542	72691.2	3440.68	6017.68	10321.3	665.168	1794.64	726.199	-3.44629	1.16862	1	1	0	0	0	GMP,
1233	export_B1 MPP SC2_Vi2.csv.1	B1	SC2	Vi	MPP	MPP	TT21	21	48	783	110625	64162.8	7.55883	32.2565	409.37	355.742	9639.93	106.254	537.244	171.937	415.171	84.0358	190598	109479	15.47	4509.43	8784.56	37855.1	1133.66	10343.1	1654.88	-2.31409	0.0491419	1	3	0	0	0	MPP,MPP,
1234	export_B1 MPP SC2_Vi2.csv.2	B1	SC2	Vi	MPP	MPP	TT21	21	48	783	108275	55347.4	1.36725	102.24	297.439	290.768	8958.56	83.4283	408.989	113.937	319.359	111.714	190598	109479	15.47	4509.43	8784.56	37855.1	1133.66	10343.1	1654.88	-2.33001	0.810388	1	3	0	0	0	MEP,MPP,MPP,
1235	export_B1 MPP SC2_Vi2.csv.3	B1	SC2	Vi	MPP	ckit+SCA1-	TT21	21	48	783	130518	111217	0.870474	108.717	284.025	269.701	8582.37	192.305	1989.22	79.2375	506.974	119.524	190598	109479	15.47	4509.43	8784.56	37855.1	1133.66	10343.1	1654.88	-2.41605	0.796079	2	3	0	0	0	MEP,MPP,MPP,
1236	export_B10 ST-HSC SC3_CV2.csv.1	B10	SC3	CV	ST-HSC	ckit+SCA1-	TT21	21	48	784	145903	89679.5	3751.15	251	162.809	195.591	3042.45	340.71	3247.59	38.3324	543.666	122.025	119661	59275.1	68616.6	322.151	4732.75	7486.25	589.172	1321.38	358.181	2.54366	2.10514	1	2	0	0	0	SLAM-HSC,SLAM+MEP,
1237	export_B10 ST-HSC SC3_CV2.csv.2	B10	SC3	CV	ST-HSC	HSC_SLAM	TT21	21	48	784	135566	91038.4	3579.01	269.551	85.2379	124.339	3004.18	287.337	1883.08	142.392	456.983	195.782	119661	59275.1	68616.6	322.151	4732.75	7486.25	589.172	1321.38	358.181	1.54698	0.234135	2	2	0	0	0	SLAM-HSC,SLAM+MEP,
1238	export_B10 ST-HSC SC3_Vi4.csv.1	B10	SC3	Vi	ST-HSC	ckit+SCA1-	TT21	21	48	785	105018	94812	1.99671	71.0781	87.3657	462.646	1774.19	194.29	1217.51	9.76075	269.886	8.56522	159813	100147	9.52	16150.4	5032.92	39098.6	3199.8	6225.32	242.397	-2.19824	3.88514	1	8	0	0	0	GMP,GMP,
1239	export_B10 ST-HSC SC3_Vi4.csv.2	B10	SC3	Vi	ST-HSC	ckit+SCA1-	TT21	21	48	785	113912	81456.5	1.96387	154.585	145.034	726.437	2059.97	477.536	3710.79	8.01988	249.799	55.9706	159813	100147	9.52	16150.4	5032.92	39098.6	3199.8	6225.32	242.397	-2.88455	3.7099	1	8	0	0	0	GMP,GMP,GMP,
1240	export_B10 ST-HSC SC3_Vi4.csv.3	B10	SC3	Vi	ST-HSC	ckit+SCA1-	TT21	21	48	785	144831	85233.9	4.8324	179.236	190.35	345.365	2321.57	489.072	3860.09	-17.9426	272.538	71.2831	159813	100147	9.52	16150.4	5032.92	39098.6	3199.8	6225.32	242.397	-1.36915	4.14892	1	8	0	0	0	MEP,GMP,GMP,GMP,
1241	export_B10 ST-HSC SC3_Vi4.csv.4	B10	SC3	Vi	ST-HSC	ckit+SCA1-	TT21	21	48	785	131281	83930.1	6.23199	165.135	146.21	253.697	2208.81	440.293	3392.7	-8.63585	258.411	93.0619	159813	100147	9.52	16150.4	5032.92	39098.6	3199.8	6225.32	242.397	-1.30154	4.20332	2	8	0	0	0	GMP,MEP,GMP,GMP,GMP,
1242	export_B10 ST-HSC SC3_Vi4.csv.5	B10	SC3	Vi	ST-HSC	ckit+SCA1-	TT21	21	48	785	135573	79021.8	2.23146	128.685	139.857	571.235	2328.41	370.629	3534.61	-22.8325	285.927	142.125	159813	100147	9.52	16150.4	5032.92	39098.6	3199.8	6225.32	242.397	-2.36563	3.89662	3	8	0	0	0	GMP,GMP,MEP,GMP,GMP,GMP,
1243	export_B10 ST-HSC SC3_Vi4.csv.6	B10	SC3	Vi	ST-HSC	ckit-	TT21	21	48	785	145485	76097.8	7.65221	66.9676	117.548	725.316	2186.31	267.257	2731.99	-2.27475	177.824	154.242	159813	100147	9.52	16150.4	5032.92	39098.6	3199.8	6225.32	242.397	-2.84771	3.82546	3	8	0	0	0	GMP,GMP,GMP,MEP,GMP,GMP,GMP,
1244	export_B10 ST-HSC SC3_Vi4.csv.7	B10	SC3	Vi	ST-HSC	ckit+SCA1-	TT21	21	48	785	137395	61944.1	6.33634	137.56	104.318	434.574	2399.47	413.928	2513.32	-15.6825	203.711	203.693	159813	100147	9.52	16150.4	5032.92	39098.6	3199.8	6225.32	242.397	-1.70044	4.12658	3	8	0	0	0	GMP,GMP,GMP,GMP,MEP,GMP,GMP,GMP,
1245	export_B10 ST-HSC SC3_Vi4.csv.8	B10	SC3	Vi	ST-HSC	ckit+SCA1-	TT21	21	48	785	128488	87421.6	8.04316	104.071	131.791	541.453	2258.39	532.192	4289.05	-7.84188	479.795	209.75	159813	100147	9.52	16150.4	5032.92	39098.6	3199.8	6225.32	242.397	-2.42724	3.46263	3	8	0	0	0	GMP,GMP,GMP,GMP,MEP,GMP,GMP,GMP,
1246	export_B11 HSC SC3_CV1.csv.1	B11	SC3	CV	HSC	HSC_SLAM	TT21	21	48	786	111633	68474.5	7288.82	615.121	155.52	128.913	5720.31	118.358	290.421	209.706	319.271	104.67	126601	66065.2	65414.3	317.023	8000.39	7555.5	3889.16	1276.48	236.347	2.52976	-1.01749	1	2	0	0	0	SLAM-HSC,SLAM-HSC,
1247	export_B11 HSC SC3_CV1.csv.2	B11	SC3	CV	HSC	HSC_SLAM	TT21	21	48	786	108275	61683.2	7142.7	1013.81	138.255	239.563	5534.39	104.524	343.229	171.988	361.228	178.437	126601	66065.2	65414.3	317.023	8000.39	7555.5	3889.16	1276.48	236.347	3.94089	-0.772044	1	2	0	0	0	SLAM-HSC,SLAM-HSC,
1248	export_B11 HSC SC3_VC2.csv.1	B11	SC3	VC	HSC	HSC_SLAM	TT21	21	48	787	124826	60793.5	1419.38	440.451	86.2803	164.516	5546.44	88.1831	305.512	3081.04	229.215	33.7283	154803	78418.6	19332.7	152.468	5732.54	19606.4	4231.83	15792	-200.211	0.496888	-4.40556	1	3	0	0	0	SLAM-HSC,SLAM-HSC,
1249	export_B11 HSC SC3_VC2.csv.2	B11	SC3	VC	HSC	HSC_SLAM	TT21	21	48	787	102304	72647.9	1403.24	747.33	122.268	174.772	5253.76	110.735	260.857	3546.95	457.624	198.435	154803	78418.6	19332.7	152.468	5732.54	19606.4	4231.83	15792	-200.211	0.883507	-5.04282	1	3	0	0	0	SLAM-HSC,SLAM-HSC,SLAM-HSC,
1250	export_B11 HSC SC3_VC2.csv.3	B11	SC3	VC	HSC	HSC_SLAM	TT21	21	48	787	130389	76351.4	1579.14	697.47	118.031	125.605	5941.87	-34.853	187.142	3765.47	293.357	211.57	154803	78418.6	19332.7	152.468	5732.54	19606.4	4231.83	15792	-200.211	0.708743	-4.89925	1	3	0	0	0	SLAM-HSC,SLAM-HSC,SLAM-HSC,
1251	export_B11 HSC SC3_Vi4.csv	B11	SC3	Vi	HSC	ckit-	TT21	21	48	788	126130	65650.5	1.71173	334.951	124.361	83.3398	2647.12	170.974	342.993	133.853	174.916	113.357	192055	122856	38.08	1127.59	7589.98	44337.1	3443.15	11903.7	222.436	1.85951	0.041725	1	1	0	0	0	SLAM-HSC,
1252	export_B12 HSC SC3_CF2.csv.1	B12	SC3	CF	HSC	HSC_ST	TT21	21	48	789	80764.5	55165.1	5502.71	223.367	204.386	107.939	44.6676	3.9179	154.765	2674.5	212.352	117.826	167554	81935.1	86270.2	624.58	4196.35	-9.10649	5989.26	17446.5	19.1436	0.199007	-3.89273	1	2	0	0	0	SLAM-HSC,SLAM-HSC,
1253	export_B12 HSC SC3_CF2.csv.2	B12	SC3	CF	HSC	HSC_SLAM	TT21	21	48	789	105899	56819.7	6008.8	283.466	145.878	164.344	45.8314	-38.8293	191.784	2676.19	262.456	202.453	167554	81935.1	86270.2	624.58	4196.35	-9.10649	5989.26	17446.5	19.1436	0.21184	-3.94222	1	2	0	0	0	SLAM-HSC,SLAM-HSC,
1254	export_B12 HSC SC3_CV2.csv.1	B12	SC3	CV	HSC	HSC_SLAM	TT21	21	48	790	124936	104116	4142.65	1039.47	130.105	194.392	2937.94	303.38	1161.78	260.137	635.987	82.9629	128827	88838.3	77657	1540.87	4222.08	7534.3	4938.88	2464.07	255.641	3.12279	-1.5424	1	3	0	0	0	SLAM-HSC,SLAM-HSC,
1255	export_B12 HSC SC3_CV2.csv.2	B12	SC3	CV	HSC	HSC_SLAM	TT21	21	48	790	128381	82120.8	3929.45	1011.83	94.5224	190.198	2903.34	178.025	936.123	503.716	777.882	212.285	128827	88838.3	77657	1540.87	4222.08	7534.3	4938.88	2464.07	255.641	3.10073	-1.6733	1	3	0	0	0	SLAM-HSC,SLAM-HSC,SLAM-HSC,
1256	export_B12 HSC SC3_CV2.csv.3	B12	SC3	CV	HSC	HSC_SLAM	TT21	21	48	790	121469	93772.5	4490.78	1062.15	113.753	188.501	3353.05	161.247	1225.31	363.69	712.198	212.825	128827	88838.3	77657	1540.87	4222.08	7534.3	4938.88	2464.07	255.641	3.1075	-1.65947	1	3	0	0	0	SLAM-HSC,SLAM-HSC,SLAM-HSC,
1257	export_B12 HSC SC3_VC2.csv	B12	SC3	VC	HSC	ckit+SCA1-	TT21	21	48	791	163047	138848	1545.56	303.283	140.653	117.305	5108.94	350.316	960.445	-27.5208	582.664	206.186	142307	62661.8	20647.7	1276.11	4969.13	20870.8	4030.43	664.459	57.1281	2.68266	2.45013	1	5	0	0	0	SLAM+MEP,SLAM+MEP,
1258	export_B12 HSC SC3_VC3.csv.1	B12	SC3	VC	HSC	ckit+SCA1-	TT21	21	48	791	134554	76604.2	830.384	322.33	138.538	93.3037	2869.12	171.951	826.613	0.173617	341.216	86.1251	142307	62661.8	20647.7	1276.11	4969.13	20870.8	4030.43	664.459	57.1281	3.08706	2.62551	1	5	0	0	0	ckit-,SLAM+MEP,SLAM+MEP,
1259	export_B12 HSC SC3_VC3.csv.2	B12	SC3	VC	HSC	ckit-	TT21	21	48	791	149585	77074.7	773.158	277.529	93.5962	102.305	2713.03	190.118	557.739	-0.473709	123.209	94.6867	142307	62661.8	20647.7	1276.11	4969.13	20870.8	4030.43	664.459	57.1281	3.95578	3.34931	2	5	0	0	0	SLAM+MEP,ckit-,SLAM+MEP,SLAM+MEP,
1260	export_B12 HSC SC3_VC3.csv.3	B12	SC3	VC	HSC	ckit+SCA1-	TT21	21	48	791	126295	80355.1	835.936	428.535	113.98	146.793	2879.48	265.202	786.055	-15.7472	587.811	194.388	142307	62661.8	20647.7	1276.11	4969.13	20870.8	4030.43	664.459	57.1281	2.86434	2.33319	3	5	0	0	0	SLAM+MEP,SLAM+MEP,ckit-,SLAM+MEP,SLAM+MEP,
1261	export_B12 HSC SC3_VC3.csv.4	B12	SC3	VC	HSC	ckit+SCA1-	TT21	21	48	791	131697	70730.6	829.506	261.433	122.514	109.42	3025.72	61.9283	297.512	6.95534	473.991	207.89	142307	62661.8	20647.7	1276.11	4969.13	20870.8	4030.43	664.459	57.1281	2.58237	2.53395	3	5	0	0	0	SLAM+MEP,SLAM+MEP,ckit-,SLAM+MEP,SLAM+MEP,
1262	export_B2 MPP SC2_Vi3.csv.1	B2	SC2	Vi	MPP	ckit+SCA1-	TT21	21	48	792	104737	70718.5	1.88484	40.5564	85.6522	926.8	4048.09	223.764	1102.81	-5.7541	483.855	9.15027	150246	116353	-3.57	13544.4	4439.87	38816.5	-429.745	2622.08	729.523	-2.91775	3.43322	1	4	0	0	0	GMP,GMP,
1263	export_B2 MPP SC2_Vi3.csv.2	B2	SC2	Vi	MPP	ckit+SCA1-	TT21	21	48	792	155141	109163	3.79051	70.2121	152.564	803.397	4908.22	450.803	3785.32	8.38383	359.82	40.2542	150246	116353	-3.57	13544.4	4439.87	38816.5	-429.745	2622.08	729.523	-2.95671	3.4033	1	4	0	0	0	GMP,GMP,GMP,
1264	export_B2 MPP SC2_Vi3.csv.3	B2	SC2	Vi	MPP	ckit+SCA1-	TT21	21	48	792	129144	70452.4	1.95884	58.0787	116.821	452.538	4426.67	429.363	2781.8	11.6591	532.833	149.217	150246	116353	-3.57	13544.4	4439.87	38816.5	-429.745	2622.08	729.523	-1.81924	3.30867	1	4	0	0	0	GMP,GMP,GMP,GMP,
1265	export_B2 MPP SC2_Vi3.csv.4	B2	SC2	Vi	MPP	ckit+SCA1-	TT21	21	48	792	124438	55397.6	6.02387	136.45	105.19	867.765	4558.38	248.276	1333.81	-17.2793	539.623	173.33	150246	116353	-3.57	13544.4	4439.87	38816.5	-429.745	2622.08	729.523	-2.88732	3.46694	1	4	0	0	0	GMP,GMP,GMP,GMP,
1266	export_B3 ST-HSC SC2_CF2.csv.1	B3	SC2	CF	ST-HSC	ckit+SCA1-	TT21	21	48	793	110137	83794.3	5911.44	105.602	111.21	331.352	81.2445	237.758	1458.45	9.42601	410.187	12.6429	163096	92304.7	138791	2064.88	5687.78	-11.902	68.9038	3754.22	251.246	-1.20136	3.72317	1	2	0	0	0	GMP,GMP,
1267	export_B3 ST-HSC SC2_CF2.csv.2	B3	SC2	CF	ST-HSC	ckit+SCA1-	TT21	21	48	793	103621	57367.9	5661.04	120.359	167.839	514.823	65.3744	250.083	1432.26	-15.1003	596.575	126.695	163096	92304.7	138791	2064.88	5687.78	-11.902	68.9038	3754.22	251.246	-2.47511	3.37522	1	2	0	0	0	GMP,GMP,
1268	export_B3 ST-HSC SC2_Vi2.csv	B3	SC2	Vi	ST-HSC	ckit+SCA1-	TT21	21	48	794	105665	57850.3	1.75552	39.9276	261.158	232.298	8196.58	176.206	505.083	11.9884	504.182	83.5753	155188	89891.4	2.38	19616.2	6124.7	42931.2	1430.38	532.605	502.069	-1.35865	2.97592	1	1	0	0	0	MEP,
1269	export_B4 ST-HSC SC2_CF1.csv.1	B4	SC2	CF	ST-HSC	ckit+SCA1-	TT21	21	48	795	117505	78935.4	6548.24	26.8562	472.486	393.688	106.065	144.385	407.118	19.7108	438.365	125.215	115811	71591.6	68369.1	1140.11	4164.58	1.11735	-438.26	2115.42	262.414	-3.20381	1.04187	1	2	0	0	0	GMP,GMP,
1270	export_B4 ST-HSC SC2_CF1.csv.2	B4	SC2	CF	ST-HSC	ckit+SCA1-	TT21	21	48	795	123871	111711	6530.4	39.2852	272.499	514.379	80.4325	150.831	443.543	21.6201	548.509	209.236	115811	71591.6	68369.1	1140.11	4164.58	1.11735	-438.26	2115.42	262.414	-3.09129	1.51375	1	2	0	0	0	GMP,GMP,
1271	export_B4 ST-HSC SC2_CV2.csv.1	B4	SC2	CV	ST-HSC	ckit+SCA1-	TT21	21	48	796	112853	50911.5	3899.77	88.3705	124.132	346.715	2832.89	109.69	589.707	24.7633	540.559	3.81361	160310	76201.7	64868.1	1993.72	5306.56	8179.54	462.205	598.553	194.874	-1.31963	3.38348	1	3	0	0	0	MEP,GMP,
1272	export_B4 ST-HSC SC2_CV2.csv.2	B4	SC2	CV	ST-HSC	ckit+SCA1-	TT21	21	48	796	99639.3	49581.6	3531.84	11.379	51.6054	296.12	2470.77	112.851	396.79	61.1286	460.026	115.7	160310	76201.7	64868.1	1993.72	5306.56	8179.54	462.205	598.553	194.874	-1.61239	3.26494	2	3	0	0	0	MEP,MEP,GMP,
1273	export_B4 ST-HSC SC2_CV2.csv.3	B4	SC2	CV	ST-HSC	ckit+SCA1-	TT21	21	48	796	121162	77158.1	3990.87	95.2406	114.637	150.596	3082.75	180.39	566.875	-10.8288	466.641	204.174	160310	76201.7	64868.1	1993.72	5306.56	8179.54	462.205	598.553	194.874	0.106115	3.63573	2	3	0	0	0	MEP,MEP,GMP,
1274	export_B4 ST-HSC SC2_VC2.csv.1	B4	SC2	VC	ST-HSC	MPP	TT21	21	48	797	129008	96281.3	1747.79	146.339	329.384	187.049	7144.31	59.0002	395.271	338.858	392.819	55.8361	142107	93598.3	31406.5	3210.45	4362.22	27137.2	-95.1663	32720.9	367.929	-1.46925	-0.529841	1	2	0	0	0	ST-HSC,MPP,
1275	export_B4 ST-HSC SC2_VC2.csv.2	B4	SC2	VC	ST-HSC	HSC_ST	TT21	21	48	797	97279	86396.2	1777.09	52.1603	202.897	100.699	6785.24	137.778	450.034	230.746	380.931	109.928	142107	93598.3	31406.5	3210.45	4362.22	27137.2	-95.1663	32720.9	367.929	-0.764	-0.0525207	2	2	0	0	0	ST-HSC,MPP,
1276	export_B4 ST-HSC SC2_Vi2.csv	B4	SC2	Vi	ST-HSC	ckit+SCA1-	TT21	21	48	798	130242	92024.9	2.41146	51.7093	84.4121	254.189	8431.38	233.08	1001.7	2.90734	491.54	102.612	180771	126973	-26.18	2488.46	12463.9	40757.4	-429.946	811.307	227.095	-0.785735	3.75881	1	2	0	0	0	GMP,MEP,
1277	export_B4 ST-HSC SC2_Vi3.csv	B4	SC2	Vi	ST-HSC	ckit+SCA1-	TT21	21	48	798	82755.7	67890.9	2.09639	85.9716	93.0711	552.372	4195.48	506.501	1749.12	-35.1324	325.453	121.396	180771	126973	-26.18	2488.46	12463.9	40757.4	-429.946	811.307	227.095	-2.41047	3.8967	2	2	0	0	0	GMP,MEP,
1278	export_B5 HSC SC2_CF1.csv	B5	SC2	CF	HSC	HSC_SLAM	TT21	21	48	799	114187	71314.3	8322.53	347.07	47.6262	534.294	48.3243	65.4663	381.267	122.782	334.155	0.0972	150592	67864.5	80260.7	8222.69	7021.85	-37.1481	6654.19	746.61	-17.5004	2.94595	0.899506	1	1	0	0	0	SLAM-HSC,
1279	export_B5 HSC SC2_VC3.csv.1	B5	SC2	VC	HSC	ckit+SCA1-	TT21	21	48	800	93012.7	68897.9	689.52	114.315	89.2642	79.8451	3903.22	150.73	248.569	-11.0326	316.43	27.0529	167592	76696.7	32632.2	1463.19	7128.3	31665.2	3768.2	506.608	40.1778	1.47786	3.34926	1	3	0	0	0	MEP,MEP,
1280	export_B5 HSC SC2_VC3.csv.2	B5	SC2	VC	HSC	ckit+SCA1-	TT21	21	48	800	132028	92482.1	771.918	131.965	76.8768	142.548	4314.41	120.319	450.801	8.08158	530.767	108.709	167592	76696.7	32632.2	1463.19	7128.3	31665.2	3768.2	506.608	40.1778	0.591574	3.56281	1	3	0	0	0	MEP,MEP,MEP,
1281	export_B5 HSC SC2_VC3.csv.3	B5	SC2	VC	HSC	ckit+SCA1-	TT21	21	48	800	106451	59234.5	832.403	84.8131	78.9938	160.613	4525.07	63.1522	443.887	5.85823	375.225	116.288	167592	76696.7	32632.2	1463.19	7128.3	31665.2	3768.2	506.608	40.1778	0.166678	3.59323	1	3	0	0	0	MEP,MEP,MEP,
1282	export_B5 HSC SC2_Vi2.csv.1	B5	SC2	Vi	HSC	ckit+SCA1-	TT21	21	48	801	120351	78854.9	1.54476	893.689	65.1457	105.758	8849.97	113.18	39.4165	-12.4818	325.204	34.6615	171930	99100.8	5.95	976.898	6124.04	42689.1	10120	570.189	-34.0001	4.91871	0.941587	1	2	0	0	0	SLAM+MEP,SLAM+MEP,
1283	export_B5 HSC SC2_Vi2.csv.2	B5	SC2	Vi	HSC	ckit+SCA1-	TT21	21	48	801	97376	73184.7	0.449692	822.465	52.6684	222.057	10027.2	114.692	25.672	-28.4408	378.299	202.378	171930	99100.8	5.95	976.898	6124.04	42689.1	10120	570.189	-34.0001	4.71297	0.779302	1	2	0	0	0	SLAM+MEP,SLAM+MEP,
1284	export_B6 HSC SC2_CV2.csv.1	B6	SC2	CV	HSC	HSC_SLAM	TT21	21	48	802	124278	61126.9	3696.23	771.21	70.9163	97.8993	3061.2	90.2954	47.3459	160.62	272.404	63.4724	137182	56595.2	77846.2	949.999	7200.71	7760.54	23343.5	5915.51	-270.371	3.41803	-0.506679	1	4	0	0	0	SLAM-HSC,SLAM-HSC,
1285	export_B6 HSC SC2_CV2.csv.2	B6	SC2	CV	HSC	ckit-	TT21	21	48	802	118937	84114.6	4052.82	848.218	77.6344	98.7702	3267.14	141.086	46.101	234.517	194.755	184.481	137182	56595.2	77846.2	949.999	7200.71	7760.54	23343.5	5915.51	-270.371	3.28196	-1.19592	1	4	0	0	0	SLAM-HSC,SLAM-HSC,SLAM-HSC,
1286	export_B6 HSC SC2_CV2.csv.3	B6	SC2	CV	HSC	HSC_SLAM	TT21	21	48	802	126547	58025	4119.66	735.678	54.1526	83.1841	3423.21	102.965	66.1762	260.291	252.537	193.031	137182	56595.2	77846.2	949.999	7200.71	7760.54	23343.5	5915.51	-270.371	3.17062	-0.936324	1	4	0	0	0	SLAM-HSC,SLAM-HSC,SLAM-HSC,SLAM-HSC,
1287	export_B6 HSC SC2_CV2.csv.4	B6	SC2	CV	HSC	ckit-	TT21	21	48	802	105563	61433.2	3693.69	720.942	87.8089	71.0926	3004.53	120.783	77.5057	201.589	199.751	196.679	137182	56595.2	77846.2	949.999	7200.71	7760.54	23343.5	5915.51	-270.371	3.17066	-0.835572	1	4	0	0	0	SLAM-HSC,SLAM-HSC,SLAM-HSC,SLAM-HSC,
1288	export_B6 HSC SC2_VC2.csv	B6	SC2	VC	HSC	HSC_SLAM	TT21	21	48	803	100853	91567.8	2491.78	3747.55	150.685	243.885	7742.86	159.148	22.2758	3398.9	454.165	224.267	165843	140122	22066.2	47.8928	3543.98	27593	71959.8	28327.5	375.11	1.52938	-5.80471	1	1	0	0	0	SLAM-HSC,
1289	export_B6 HSC SC2_Vi3.csv.1	B6	SC2	Vi	HSC	HSC_SLAM	TT21	21	48	804	127502	74355.2	1.32888	674.645	104.808	80.8146	4748.88	125.875	58.6754	93.5238	251.312	0.531851	171596	109852	-1.19	1064.57	6175.82	43520.5	32814.9	4757.72	-185.339	3.68625	0.236483	1	5	0	0	0	SLAM-HSC,SLAM-HSC,
1290	export_B6 HSC SC2_Vi3.csv.2	B6	SC2	Vi	HSC	HSC_SLAM	TT21	21	48	804	103752	91679.9	1.96502	588.408	86.3749	119.22	4669.74	114.221	59.0091	113.757	233.739	4.35446	171596	109852	-1.19	1064.57	6175.82	43520.5	32814.9	4757.72	-185.339	3.5864	0.110024	1	5	0	0	0	SLAM+MEP,SLAM-HSC,SLAM-HSC,
1291	export_B6 HSC SC2_Vi3.csv.3	B6	SC2	Vi	HSC	ckit+SCA1-	TT21	21	48	804	137002	84705.2	1.53443	794.6	59.2689	117.026	4708.03	77.9804	77.547	5.50184	567.978	25.6172	171596	109852	-1.19	1064.57	6175.82	43520.5	32814.9	4757.72	-185.339	4.60393	0.900762	2	5	0	0	0	SLAM-HSC,SLAM+MEP,SLAM-HSC,SLAM-HSC,
1292	export_B6 HSC SC2_Vi3.csv.4	B6	SC2	Vi	HSC	HSC_SLAM	TT21	21	48	804	131472	73586.3	0.981857	665.542	80.5093	79.3051	4840.97	161.757	75.7317	85.0678	237.909	86.5807	171596	109852	-1.19	1064.57	6175.82	43520.5	32814.9	4757.72	-185.339	3.6639	0.230222	3	5	0	0	0	SLAM+MEP,SLAM-HSC,SLAM+MEP,SLAM-HSC,SLAM-HSC,
1293	export_B6 HSC SC2_Vi3.csv.5	B6	SC2	Vi	HSC	ckit+SCA1-	TT21	21	48	804	122106	96195.4	1.39209	625.999	124.324	48.3524	5476.79	98.1274	49.1524	17.258	671.757	203.647	171596	109852	-1.19	1064.57	6175.82	43520.5	32814.9	4757.72	-185.339	4.43013	1.06409	4	5	0	0	0	SLAM+MEP,SLAM-HSC,SLAM+MEP,SLAM-HSC,SLAM-HSC,
1294	export_B7 MPP SC3_CF2.csv	B7	SC3	CF	MPP	MPP	TT21	21	48	805	112101	84600.2	4493.89	95.232	1071.36	3045.5	97.013	470.309	1471	775.435	201.116	127.128	167867	87456.7	106695	1618.58	2452.83	-30.6231	705.894	3224.3	2426.51	-2.72563	-3.82385	1	1	0	0	0	MPP,
1295	export_B7 MPP SC3_CV3.csv	B7	SC3	CV	MPP	ckit-	TT21	21	48	806	102703	81755	2695.42	164.929	353.632	8164.59	1628.77	451.987	1555.36	13.3322	136.507	40.621	167968	86252.4	89395.2	2329.65	3151.9	6798.87	-52.5567	1070.29	1502.4	-5.87231	3.97989	1	1	0	0	0	MyP,
1296	export_B7 MPP SC3_Vi2.csv	B7	SC3	Vi	MPP	ckit-	TT21	21	48	807	146748	96413.1	2.35262	133.037	601.519	570.622	11770.5	353.347	2939.88	625.644	133.12	89.0369	164531	126839	42.84	20460.6	5425.57	57176.2	86.1645	8743.39	3181.16	-2.58854	-2.91215	1	2	0	0	0	MPP,MPP,
1297	export_B7 MPP SC3_Vi3.csv	B7	SC3	Vi	MPP	ckit-	TT21	21	48	807	93115.4	90669.8	5.8601	105.117	611.735	641.049	6457.02	283.847	1870.35	84.6084	138.758	48.2641	164531	126839	42.84	20460.6	5425.57	57176.2	86.1645	8743.39	3181.16	-2.95155	0.936696	1	2	0	0	0	MPP,MPP,
1298	export_B8 MPP SC3_CF1.csv.1	B8	SC3	CF	MPP	ckit-	TT21	21	48	808	147298	118572	7218.53	261.063	1138.87	601.803	214.974	274.468	2790.96	1095.11	181.843	18.4951	139934	66979.2	80995	467.958	3394.42	-28.081	408.308	5771.51	1595.54	-2.32816	-3.88144	1	2	0	0	0	SLAM+FLT3+,SLAM+FLT3+,
1299	export_B8 MPP SC3_CF1.csv.2	B8	SC3	CF	MPP	SLAM+Flt3+	TT21	21	48	808	151660	132666	7130.1	285.381	842.957	1295.08	186.387	293.039	2455.78	1132.57	269.314	119.072	139934	66979.2	80995	467.958	3394.42	-28.081	408.308	5771.51	1595.54	-2.47283	-3.96827	1	2	0	0	0	SLAM+FLT3+,SLAM+FLT3+,
1300	export_B8 MPP SC3_CV2.csv.1	B8	SC3	CV	MPP	SLAM+Flt3+	TT21	21	48	809	91419.2	88007.8	3143.43	276.992	476.955	2682.9	2521.61	438.94	2079.24	137.868	279.343	63.6038	130206	69568.6	75129.5	6172.5	3793.18	7033.67	1890.05	12449.8	867.127	-5.00593	2.85544	1	2	0	0	0	SLAM+FLT3+,SLAM+FLT3+,
1301	export_B8 MPP SC3_CV2.csv.2	B8	SC3	CV	MPP	SLAM+Flt3+	TT21	21	48	809	108062	82074	3177.26	440.31	341.286	4237.76	2522.45	638.855	2294.95	91.1858	227.83	118.958	130206	69568.6	75129.5	6172.5	3793.18	7033.67	1890.05	12449.8	867.127	-4.97461	3.06272	1	2	0	0	0	SLAM+FLT3+,SLAM+FLT3+,
1302	export_B8 MPP SC3_Vi2.csv.1	B8	SC3	Vi	MPP	MPP	TT21	21	48	810	158181	132398	6.72165	156.958	3311.31	3519.24	11002.6	432.718	2005.08	1038.14	236.12	126.631	189150	118992	1.19	24755.5	2306.12	51503.3	2434.11	4718.44	8003.82	-2.68984	-3.86184	1	2	0	0	0	SLAM+FLT3+,MPP,
1303	export_B8 MPP SC3_Vi2.csv.2	B8	SC3	Vi	MPP	SLAM+Flt3+	TT21	21	48	810	155212	88970.2	8.95045	300.165	2939.67	1538.2	11375.1	522.491	2151.09	1233.87	523.546	211.514	189150	118992	1.19	24755.5	2306.12	51503.3	2434.11	4718.44	8003.82	-2.59416	-3.87511	2	2	0	0	0	SLAM+FLT3+,MPP,
1304	export_B9 ST-HSC SC3_CF3.csv.1	B9	SC3	CF	ST-HSC	ckit-	TT21	21	48	811	153750	102792	2174.92	175.445	145.619	1335.39	101.892	210.481	2647.24	-15.6356	194.367	33.0713	136320	63932.8	86290.5	2074.63	4783.33	-5.78196	1412.56	1357.41	100.684	-3.64495	3.59293	1	4	0	0	0	MEP,GMP,
1305	export_B9 ST-HSC SC3_CF3.csv.2	B9	SC3	CF	ST-HSC	ckit+SCA1-	TT21	21	48	811	147489	98296.5	2253.29	99.6128	118.817	177.452	137.051	466.658	3269.16	-5.59019	340.669	139.369	136320	63932.8	86290.5	2074.63	4783.33	-5.78196	1412.56	1357.41	100.684	-0.170651	3.67713	2	4	0	0	0	GMP,MEP,GMP,
1306	export_B9 ST-HSC SC3_CF3.csv.3	B9	SC3	CF	ST-HSC	ckit+SCA1-	TT21	21	48	811	128603	92352.2	2132.56	205.033	110.69	316.515	96.7865	346.31	2455.33	-27.033	236.857	145.611	136320	63932.8	86290.5	2074.63	4783.33	-5.78196	1412.56	1357.41	100.684	-1.41598	4.26998	3	4	0	0	0	GMP,GMP,MEP,GMP,
1307	export_B9 ST-HSC SC3_CF3.csv.4	B9	SC3	CF	ST-HSC	ckit+SCA1-	TT21	21	48	811	122771	94581.8	2174.03	237.48	169.083	1023.42	129.631	475.024	2964.2	-27.8981	258.934	174.633	136320	63932.8	86290.5	2074.63	4783.33	-5.78196	1412.56	1357.41	100.684	-3.39628	3.58984	3	4	0	0	0	GMP,GMP,MEP,GMP,
1308	export_B9 ST-HSC SC3_CV2.csv	B9	SC3	CV	ST-HSC	HSC_SLAM	TT21	21	48	812	158895	124073	3521.57	390.397	90.3518	397.242	3055.88	55.2393	735.183	3353.97	322.194	45.8788	137878	79052.9	47037.1	2307.9	2922.14	8813.31	-211.822	15994.2	366.39	0.229902	-4.48003	1	1	0	0	0	SLAM-HSC,
1309	export_B9 ST-HSC SC3_Vi3.csv.1	B9	SC3	Vi	ST-HSC	ckit+SCA1-	TT21	21	48	813	133952	77668.3	2.1626	142.365	84.7489	152.197	3125.93	204.245	1008.66	29.707	361.079	84.1024	152120	77549.9	-8.33	815.498	7693.66	34664.6	377.083	1213.98	87.7654	1.10806	3.15441	1	4	0	0	0	SLAM+MEP,MEP,
1310	export_B9 ST-HSC SC3_Vi3.csv.2	B9	SC3	Vi	ST-HSC	ckit+SCA1-	TT21	21	48	813	144836	106865	4.34421	505.492	117.835	93.3766	3593.74	198.238	1089.38	-4.09772	249.602	124.902	152120	77549.9	-8.33	815.498	7693.66	34664.6	377.083	1213.98	87.7654	4.50888	2.19021	2	4	0	0	0	MEP,SLAM+MEP,MEP,
1311	export_B9 ST-HSC SC3_Vi3.csv.3	B9	SC3	Vi	ST-HSC	ckit+SCA1-	TT21	21	48	813	148490	91585.1	2.5162	89.6472	122.75	201.122	3329.32	348.477	736.162	-12.0844	349.73	208.014	152120	77549.9	-8.33	815.498	7693.66	34664.6	377.083	1213.98	87.7654	-0.367771	3.76509	3	4	0	0	0	SLAM+MEP,MEP,SLAM+MEP,MEP,
1312	export_B9 ST-HSC SC3_Vi3.csv.4	B9	SC3	Vi	ST-HSC	ckit+SCA1-	TT21	21	48	813	139856	113765	4.3717	403.056	121.237	168.914	3504.64	116.028	793.052	6.28584	269.889	218.78	152120	77549.9	-8.33	815.498	7693.66	34664.6	377.083	1213.98	87.7654	3.83196	2.13954	4	4	0	0	0	SLAM+MEP,MEP,SLAM+MEP,MEP,
1313	export_C1 MPP SC2_CF0.csv	C1	SC2	CF	MPP	MPP	TT21	21	48	814	116119	122198	15364.6	107.5	823.341	133.258	145.826	151.975	454.421	355.715	557.989	36.737	151760	72275.8	96166.3	4663.82	2155.31	-32.9243	-712.118	7607.39	1567.4	-2.51064	-0.991994	1	1	0	0	0	MPP,
1314	export_C1 MPP SC2_Vi1.csv	C1	SC2	Vi	MPP	ckit+SCA1-	TT21	21	48	815	149067	95523.2	1.92536	122.189	575.232	387.831	16580.8	133.563	1020.07	36.0187	882.534	86.5902	149560	84900.6	27.37	9924.09	7406.58	38333.1	1363.7	6538.2	920.64	-3.08356	0.597657	1	3	0	0	0	MEP,GMP,
1315	export_C1 MPP SC2_Vi2.csv.1	C1	SC2	Vi	MPP	ckit+SCA1-	TT21	21	48	815	110543	66381.2	2.04207	42.7219	348.248	229.817	9300.85	190.908	1102.75	45.317	521.906	7.12871	149560	84900.6	27.37	9924.09	7406.58	38333.1	1363.7	6538.2	920.64	-2.56824	0.801661	2	3	0	0	0	MEP,MEP,GMP,
1316	export_C1 MPP SC2_Vi2.csv.2	C1	SC2	Vi	MPP	ckit+SCA1-	TT21	21	48	815	105285	71411.1	1.96866	21.1734	229.348	292.165	8848.52	134.99	1061.99	45.8208	488.662	100.165	149560	84900.6	27.37	9924.09	7406.58	38333.1	1363.7	6538.2	920.64	-1.50366	2.88107	2	3	0	0	0	MEP,MEP,GMP,
1317	export_C10 ST-HSC SC3_CF2.csv	C10	SC3	CF	ST-HSC	ckit+SCA1-	TT21	21	48	816	129056	127324	3751.73	453.065	112.211	117.858	76.505	140.491	100.526	9.09533	398.47	185.207	139766	60631.7	79691.9	467.074	8147.77	-15.9037	3016.13	1403.02	-122.95	4.0407	1.67691	1	1	0	0	0	SLAM+MEP,
1318	export_C10 ST-HSC SC3_CV5.csv.1	C10	SC3	CV	ST-HSC	ckit-	TT21	21	48	817	111107	129788	611.504	114.624	116.544	6860.03	500.873	593.078	448.183	-29.0949	172.502	16.1297	185286	132025	112595	2244.58	3387.18	9948.58	1703.94	604.455	224.126	-5.8683	4.02162	1	2	0	0	0	GMP,GMP,
1319	export_C10 ST-HSC SC3_CV5.csv.2	C10	SC3	CV	ST-HSC	ckit-	TT21	21	48	817	127942	159597	579.402	74.3214	121.463	6686.37	428.258	569.221	237.673	-48.6512	157.835	217.458	185286	132025	112595	2244.58	3387.18	9948.58	1703.94	604.455	224.126	-5.8272	4.03376	1	2	0	0	0	GMP,GMP,
1320	export_C10 ST-HSC SC3_VC3.csv.1	C10	SC3	VC	ST-HSC	HSC_ST	TT21	21	48	818	93353	66733.6	809.468	89.9849	81.608	137.378	3832.55	224.77	1581.89	170.763	374.129	21.1669	146263	92686.7	22360.1	1209.86	4101.28	28653.5	1306.1	620.926	133.362	0.303207	0.78244	1	7	0	0	0	ST-HSC,ST-HSC,
1321	export_C10 ST-HSC SC3_VC3.csv.2	C10	SC3	VC	ST-HSC	HSC_ST	TT21	21	48	818	126056	63647.4	850.516	80.491	111.717	69.2917	4414.25	131.875	780.652	401.839	235.344	36.1487	146263	92686.7	22360.1	1209.86	4101.28	28653.5	1306.1	620.926	133.362	-0.0901226	-0.305787	1	7	0	0	0	ST-HSC,ST-HSC,ST-HSC,
1322	export_C10 ST-HSC SC3_VC3.csv.3	C10	SC3	VC	ST-HSC	HSC_ST	TT21	21	48	818	107445	68043.6	831.868	54.4721	113.916	121.798	4060.27	110.528	1245.42	211.501	200.617	51.029	146263	92686.7	22360.1	1209.86	4101.28	28653.5	1306.1	620.926	133.362	0.289361	0.895904	1	7	0	0	0	ST-HSC,ST-HSC,ST-HSC,ST-HSC,
1323	export_C10 ST-HSC SC3_VC3.csv.4	C10	SC3	VC	ST-HSC	HSC_ST	TT21	21	48	818	114652	57392.3	867.199	92.3595	97.4056	123.421	4199.63	196.928	779.841	411.547	316.584	59.7323	146263	92686.7	22360.1	1209.86	4101.28	28653.5	1306.1	620.926	133.362	-0.129528	-0.300157	1	7	0	0	0	ST-HSC,ST-HSC,ST-HSC,ST-HSC,ST-HSC,
1324	export_C10 ST-HSC SC3_VC3.csv.5	C10	SC3	VC	ST-HSC	HSC_ST	TT21	21	48	818	117536	65995	758.216	166.888	94.047	105.549	3837.16	169.002	1049.42	142.304	225.309	95.9429	146263	92686.7	22360.1	1209.86	4101.28	28653.5	1306.1	620.926	133.362	1.26084	0.52009	1	7	0	0	0	ST-HSC,ST-HSC,ST-HSC,ST-HSC,ST-HSC,ST-HSC,
1325	export_C10 ST-HSC SC3_VC3.csv.6	C10	SC3	VC	ST-HSC	HSC_ST	TT21	21	48	818	108265	75645.1	780.438	52.6124	93.3075	130.492	3985.07	206.668	1558.18	177.786	308.754	180.871	146263	92686.7	22360.1	1209.86	4101.28	28653.5	1306.1	620.926	133.362	0.327575	0.969071	1	7	0	0	0	ST-HSC,ST-HSC,ST-HSC,ST-HSC,ST-HSC,ST-HSC,ST-HSC,
1326	export_C10 ST-HSC SC3_VC3.csv.7	C10	SC3	VC	ST-HSC	HSC_ST	TT21	21	48	818	117751	61374.1	734.713	52.5987	174.873	165.988	3652.84	205.596	1608.49	121.965	258.284	200.158	146263	92686.7	22360.1	1209.86	4101.28	28653.5	1306.1	620.926	133.362	0.38564	1.59291	1	7	0	0	0	ST-HSC,ST-HSC,ST-HSC,ST-HSC,ST-HSC,ST-HSC,ST-HSC,
1327	export_C10 ST-HSC SC3_Vi2.csv.1	C10	SC3	Vi	ST-HSC	HSC_SLAM	TT21	21	48	819	123784	75474.1	1.59224	459.151	64.8951	170.761	10945.6	-95.6983	180.572	2890.21	305.62	29.3961	153974	86098.9	3.57	503.456	4372.79	39609.1	890.336	18720.9	138.052	0.514781	-4.44758	1	2	0	0	0	SLAM-HSC,SLAM-HSC,
1328	export_C10 ST-HSC SC3_Vi2.csv.2	C10	SC3	Vi	ST-HSC	ckit-	TT21	21	48	819	78364	71120.6	1.33971	290.966	98.083	186.135	9225.1	25.7007	79.3802	1859.01	152.613	212.873	153974	86098.9	3.57	503.456	4372.79	39609.1	890.336	18720.9	138.052	0.527354	-4.04466	1	2	0	0	0	SLAM-HSC,SLAM-HSC,
1329	export_C11 HSC SC3_CF3.csv.1	C11	SC3	CF	HSC	ckit+SCA1-	TT21	21	48	820	127464	84370.4	2772.27	488.395	88.3982	89.7777	60.8241	195.899	100.458	62.2723	344.152	35.4434	162439	82023.1	99506.6	688.422	4815.88	-47.6152	21935.3	6262.75	39.7318	3.90718	0.83911	1	4	0	0	0	SLAM-HSC,SLAM+MEP,
1330	export_C11 HSC SC3_CF3.csv.2	C11	SC3	CF	HSC	HSC_SLAM	TT21	21	48	820	109325	72964.4	2576.29	505.775	98.3297	107.894	47.4131	135.028	78.7134	89.5425	253.92	202.758	162439	82023.1	99506.6	688.422	4815.88	-47.6152	21935.3	6262.75	39.7318	3.68691	0.385176	2	4	0	0	0	SLAM+MEP,SLAM-HSC,SLAM+MEP,
1331	export_C11 HSC SC3_CF3.csv.3	C11	SC3	CF	HSC	ckit-	TT21	21	48	820	141443	114267	2945.1	1456.44	74.1189	125.047	80.7321	146.539	59.3349	-5.42709	160.514	207.033	162439	82023.1	99506.6	688.422	4815.88	-47.6152	21935.3	6262.75	39.7318	5.68317	0.871489	3	4	0	0	0	SLAM+MEP,SLAM+MEP,SLAM-HSC,SLAM+MEP,
1332	export_C11 HSC SC3_CF3.csv.4	C11	SC3	CF	HSC	ckit+SCA1-	TT21	21	48	820	94554	54171.6	1995.85	594.328	107.28	122.823	36.4092	63.2689	98.3246	79.9618	302.285	217.382	162439	82023.1	99506.6	688.422	4815.88	-47.6152	21935.3	6262.75	39.7318	3.73556	0.579182	3	4	0	0	0	SLAM+MEP,SLAM+MEP,SLAM-HSC,SLAM+MEP,
1333	export_C11 HSC SC3_CV0.csv	C11	SC3	CV	HSC	HSC_SLAM	TT21	21	48	821	92383.7	64380.5	14228.3	2070.49	170.607	355.817	10207.5	-168.918	10.7429	9121.12	230.422	136.268	155763	73057.7	48993.5	54.4694	1560.25	8781.81	31654.9	33846.2	115.566	1.25679	-5.92864	1	1	0	0	0	SLAM-HSC,
1334	export_C11 HSC SC3_VC3.csv.1	C11	SC3	VC	HSC	ckit-	TT21	21	48	822	121778	84425.3	1114.22	305.411	58.0365	78.1683	4147.03	117.999	145.902	11.0633	178.725	21.2051	110030	119071	24229.6	-244.715	9077.29	28065.6	8257.84	1240.19	156.964	4.08716	2.84697	1	2	0	0	0	SLAM+MEP,SLAM+MEP,
1335	export_C11 HSC SC3_VC3.csv.2	C11	SC3	VC	HSC	ckit-	TT21	21	48	822	125326	70906.1	989.904	291.597	110.985	111.21	3487.52	134.791	325.646	58.2186	185.62	172.761	110030	119071	24229.6	-244.715	9077.29	28065.6	8257.84	1240.19	156.964	3.32184	2.86039	1	2	0	0	0	SLAM+MEP,SLAM+MEP,
1336	export_C11 HSC SC3_Vi4.csv.1	C11	SC3	Vi	HSC	ckit-	TT21	21	48	823	98568	60580.5	1.9021	299.139	101.744	93.6023	2350.04	93.4548	74.2808	6.77619	195.822	124.635	154261	72917.2	11.9	-259.183	4992.93	38312.5	11828.5	752.824	-17.5761	3.88017	2.89286	1	3	0	0	0	SLAM+MEP,SLAM+MEP,
1337	export_C11 HSC SC3_Vi4.csv.2	C11	SC3	Vi	HSC	ckit-	TT21	21	48	823	117044	52089.2	1.44615	221.995	122.109	57.8543	1851.04	108.914	38.2964	-2.46082	159.306	151.572	154261	72917.2	11.9	-259.183	4992.93	38312.5	11828.5	752.824	-17.5761	3.78658	3.41218	1	3	0	0	0	SLAM+MEP,SLAM+MEP,SLAM+MEP,
1338	export_C11 HSC SC3_Vi4.csv.3	C11	SC3	Vi	HSC	ckit+SCA1-	TT21	21	48	823	132330	66957.8	1.43127	505.302	73.2832	106.418	2504.01	122.16	167.425	12.0688	240.604	200.925	154261	72917.2	11.9	-259.183	4992.93	38312.5	11828.5	752.824	-17.5761	4.52224	2.25766	1	3	0	0	0	SLAM+MEP,SLAM+MEP,SLAM+MEP,
1339	export_C12 HSC SC3_CF2.csv.1	C12	SC3	CF	HSC	HSC_SLAM	TT21	21	48	824	106429	63974	3602.68	1102.64	115.171	178.061	45.4406	141.911	47.7707	4021.05	514.243	183.558	141695	61924	77970	52.2967	4684.12	-27.335	10455.4	3585.69	-84.9522	1.02204	-5.2781	1	3	0	0	0	SLAM-HSC,SLAM-HSC,
1340	export_C12 HSC SC3_CF2.csv.2	C12	SC3	CF	HSC	HSC_SLAM	TT21	21	48	824	127315	76542.2	4198.56	856.589	97.4954	160.364	55.5001	40.2716	64.8756	2664.2	527.891	218.805	141695	61924	77970	52.2967	4684.12	-27.335	10455.4	3585.69	-84.9522	1.01757	-5.03056	1	3	0	0	0	SLAM-HSC,SLAM-HSC,SLAM-HSC,
1341	export_C12 HSC SC3_CF2.csv.3	C12	SC3	CF	HSC	HSC_SLAM	TT21	21	48	824	118463	61330.8	3933.88	790.027	73.393	90.4614	42.4479	43.3919	38.5	2805.13	437.233	224.038	141695	61924	77970	52.2967	4684.12	-27.335	10455.4	3585.69	-84.9522	0.987068	-4.89275	1	3	0	0	0	SLAM-HSC,SLAM-HSC,SLAM-HSC,
1342	export_C12 HSC SC3_Vi3.csv.1	C12	SC3	Vi	HSC	ckit+SCA1-	TT21	21	48	825	159926	150819	5.80268	349.577	137.443	761.577	3898.19	286.751	2324.67	-17.1915	515.019	104.208	134523	109534	20.23	3247.32	5295.45	37414	3578.68	843.53	37.8238	-3.03033	3.52764	1	3	0	0	0	MEP,GMP,
1343	export_C12 HSC SC3_Vi3.csv.2	C12	SC3	Vi	HSC	ckit+SCA1-	TT21	21	48	825	177972	140653	4.61453	199.697	139.256	240.4	3727.4	352.505	1774.77	9.97969	790.004	212.42	134523	109534	20.23	3247.32	5295.45	37414	3578.68	843.53	37.8238	2.40286	2.2954	2	3	0	0	0	GMP,MEP,GMP,
1344	export_C12 HSC SC3_Vi4.csv	C12	SC3	Vi	HSC	ckit+SCA1-	TT21	21	48	825	105471	67839.5	1.87314	213.685	94.6783	308.411	1899.79	213.813	1303.58	-4.28515	238.38	207.238	134523	109534	20.23	3247.32	5295.45	37414	3578.68	843.53	37.8238	3.26782	2.21044	3	3	0	0	0	GMP,MEP,GMP,
1345	export_C2 MPP SC2_Vi2.csv	C2	SC2	Vi	MPP	HSC_ST	TT21	21	48	826	94305.5	96192.3	0.523347	97.2485	96.3189	306.836	10446.8	232.783	1177.08	222.457	618.499	220.467	146698	77787.9	8.33	12155	3033.27	36218.3	-405.474	7266.4	712.988	-1.13005	0.543492	1	1	0	0	0	ST-HSC,
1346	export_C3 ST-HSC SC2_VC2.csv.1	C3	SC2	VC	ST-HSC	ckit+SCA1-	TT21	21	48	827	122778	68634.5	1660.18	46.2298	113.559	119.325	7154.7	38.3815	54.6623	38.8242	623.858	23.1707	158388	81714.9	22495.8	507.603	4795.01	22332.8	-349.882	3157.01	134.76	0.197322	3.13473	1	4	0	0	0	MEP,MEP,
1347	export_C3 ST-HSC SC2_VC2.csv.2	C3	SC2	VC	ST-HSC	ckit+SCA1-	TT21	21	48	827	90749.2	56990.1	1563.28	99.0782	123.573	141.238	6262.2	51.1003	55.8622	41.7928	346.94	85.9715	158388	81714.9	22495.8	507.603	4795.01	22332.8	-349.882	3157.01	134.76	0.664742	2.86747	1	4	0	0	0	MEP,MEP,MEP,
1348	export_C3 ST-HSC SC2_VC2.csv.3	C3	SC2	VC	ST-HSC	ckit+SCA1-	TT21	21	48	827	97715.4	55233.6	1445.29	51.1055	130.622	47.3196	6093.8	89.1494	72.6887	16.6772	376.949	131.103	158388	81714.9	22495.8	507.603	4795.01	22332.8	-349.882	3157.01	134.76	0.581031	3.05211	1	4	0	0	0	MEP,MEP,MEP,MEP,
1349	export_C3 ST-HSC SC2_VC2.csv.4	C3	SC2	VC	ST-HSC	ckit+SCA1-	TT21	21	48	827	131410	52812.9	1435.79	25.6082	100.814	71.0434	5774.88	67.6572	80.2574	38.9482	593.862	169.362	158388	81714.9	22495.8	507.603	4795.01	22332.8	-349.882	3157.01	134.76	0.511546	2.93282	1	4	0	0	0	MEP,MEP,MEP,MEP,
1350	export_C3 ST-HSC SC2_Vi2.csv.1	C3	SC2	Vi	ST-HSC	ckit+SCA1-	TT21	21	48	828	83514.5	68536.4	1.44894	63.7098	108.323	557.801	10289.8	124.001	1014.06	1.54065	246.73	99.1776	133586	124748	-48.79	3464.06	4500.25	50398.3	474.62	1312.88	133.487	-2.46912	3.8948	1	2	0	0	0	GMP,GMP,
1351	export_C3 ST-HSC SC2_Vi2.csv.2	C3	SC2	Vi	ST-HSC	ckit+SCA1-	TT21	21	48	828	149190	130910	2.17503	48.8684	64.1155	550.083	11203.1	124.862	1048.4	11.6893	401.467	181.951	133586	124748	-48.79	3464.06	4500.25	50398.3	474.62	1312.88	133.487	-2.08755	3.47961	1	2	0	0	0	GMP,GMP,
1352	export_C4 ST-HSC SC2_CF1.csv	C4	SC2	CF	ST-HSC	ckit+SCA1-	TT21	21	48	829	135103	102271	9597.5	58.6963	169.928	655.896	112.734	96.6918	757.401	37.8879	398.033	212.509	141819	81140.2	102528	960.677	6219.67	9.91199	-2.5413	551.582	312.376	-2.79121	3.02773	1	1	0	0	0	GMP,
1353	export_C4 ST-HSC SC2_CV2.csv.1	C4	SC2	CV	ST-HSC	HSC_ST	TT21	21	48	830	129207	62355.3	3966.65	66.169	121.722	85.1173	2732.71	106.185	105.591	324.527	433.793	56.5034	147807	75929.1	67110.1	495.366	6100.24	8214.12	2311.03	20691	13.2876	-0.202444	-0.0920567	1	3	0	0	0	ST-HSC,ST-HSC,
1354	export_C4 ST-HSC SC2_CV2.csv.2	C4	SC2	CV	ST-HSC	HSC_ST	TT21	21	48	830	130041	77433	3998.27	66.4896	155.491	71.1397	2964.05	96.7105	86.452	246.737	250.341	70.1495	147807	75929.1	67110.1	495.366	6100.24	8214.12	2311.03	20691	13.2876	-0.0477892	0.25322	1	3	0	0	0	SLAM-HSC,ST-HSC,ST-HSC,
1355	export_C4 ST-HSC SC2_CV2.csv.3	C4	SC2	CV	ST-HSC	HSC_ST	TT21	21	48	830	126032	98614.9	3911.4	211.327	117.779	122.776	2946.94	105.23	324.096	166.363	380.101	167.967	147807	75929.1	67110.1	495.366	6100.24	8214.12	2311.03	20691	13.2876	1.29821	0.258456	2	3	0	0	0	SLAM-HSC,ST-HSC,ST-HSC,
1356	export_C4 ST-HSC SC2_VC2.csv	C4	SC2	VC	ST-HSC	ckit+SCA1-	TT21	21	48	831	94514.2	79473.5	1357.93	65.8783	103.158	369.441	5969.44	135.939	560.63	65.8537	403.977	223.347	163643	86070.3	24766.3	16367.8	4457.81	25469.1	2923.98	733.025	330.472	-1.37952	2.72891	1	2	0	0	0	GMP,GMP,
1357	export_C4 ST-HSC SC2_VC3.csv	C4	SC2	VC	ST-HSC	ckit+SCA1-	TT21	21	48	831	81435.7	71106.2	1173.2	38.3367	153.892	347.57	4238.28	163.421	780.725	71.5038	475.647	218.968	163643	86070.3	24766.3	16367.8	4457.81	25469.1	2923.98	733.025	330.472	-1.5002	2.90461	1	2	0	0	0	GMP,GMP,
1358	export_C4 ST-HSC SC2_Vi1.csv	C4	SC2	Vi	ST-HSC	ckit+SCA1-	TT21	21	48	832	85822.7	48033.2	15.2415	54.582	898.265	393.492	14253.2	144.353	496.44	45.4144	417.41	80.8773	188819	94161.1	10.71	3235.71	6057.21	35813.8	-677.455	890.623	545.762	-3.2857	0.586442	1	1	0	0	0	GMP,
1359	export_C5 HSC SC2_CF1.csv.1	C5	SC2	CF	HSC	HSC_ST	TT21	21	48	833	113452	97455	9585.25	212.333	103.804	193.209	39.7093	40.7831	65.7357	393.717	345.587	43.0783	139657	80210.8	84719.7	696.407	5522.45	-46.4396	3849.84	3114.41	21.089	0.362669	-0.990229	1	2	0	0	0	SLAM-HSC,SLAM-HSC,
1360	export_C5 HSC SC2_CF1.csv.2	C5	SC2	CF	HSC	HSC_SLAM	TT21	21	48	833	144277	99921.8	9633.67	302.311	108.898	41.6998	80.0298	80.2226	96.3972	309.074	520.965	208.23	139657	80210.8	84719.7	696.407	5522.45	-46.4396	3849.84	3114.41	21.089	0.934121	-0.703966	1	2	0	0	0	SLAM-HSC,SLAM-HSC,
1361	export_C5 HSC SC2_CV2.csv.1	C5	SC2	CV	HSC	ckit-	TT21	21	48	834	145720	103052	5707.02	1704.32	90.9071	84.1841	4748.84	208.178	83.2461	-12.7126	198.005	7.61042	168102	96167.5	105565	1196.66	5927.22	12173.5	24387.3	3680.04	-146.902	5.67183	0.623769	1	4	0	0	0	SLAM-HSC,SLAM+MEP,
1362	export_C5 HSC SC2_CV2.csv.2	C5	SC2	CV	HSC	HSC_SLAM	TT21	21	48	834	133381	97201.3	5877.6	1167.15	128.558	132.862	5003.54	122.982	50.7724	151.635	387.033	90.0264	168102	96167.5	105565	1196.66	5927.22	12173.5	24387.3	3680.04	-146.902	3.80268	-1.0339	2	4	0	0	0	SLAM+MEP,SLAM-HSC,SLAM+MEP,
1363	export_C5 HSC SC2_CV2.csv.3	C5	SC2	CV	HSC	ckit+SCA1-	TT21	21	48	834	147929	85130.7	6062.42	1681.84	151.155	124.887	5095.81	181.497	95.2835	16.8834	233.634	211.78	168102	96167.5	105565	1196.66	5927.22	12173.5	24387.3	3680.04	-146.902	5.42267	0.30595	3	4	0	0	0	SLAM+MEP,SLAM+MEP,SLAM-HSC,SLAM+MEP,
1364	export_C5 HSC SC2_CV3.csv	C5	SC2	CV	HSC	ckit+SCA1-	TT21	21	48	834	96116	55431.9	3021.37	879.421	89.4812	81.3937	2398.56	124.962	46.7513	-2.06061	445.952	30.525	168102	96167.5	105565	1196.66	5927.22	12173.5	24387.3	3680.04	-146.902	4.82849	0.922708	3	4	0	0	0	SLAM+MEP,SLAM+MEP,SLAM-HSC,SLAM+MEP,
1365	export_C6 HSC SC2_CV1.csv	C6	SC2	CV	HSC	HSC_SLAM	TT21	21	48	835	97190.8	57773.3	11472.4	261.817	96.0505	242.024	10805.2	53.4553	37.6601	1971.22	433.27	213.925	150535	120770	86626.1	108.565	5298.66	13205.3	4253.24	22995.4	325.338	0.29422	-3.79906	1	1	0	0	0	SLAM-HSC,
1366	export_C6 HSC SC2_VC3.csv	C6	SC2	VC	HSC	ckit+SCA1-	TT21	21	48	836	108294	60905.2	916.441	403.356	83.4653	65.329	4371.77	135.803	43.7786	13.4373	235.416	213.626	142330	69960.1	27937.6	443.416	4655.24	31217.8	26661.6	1247.04	-12.2739	4.30466	2.54795	1	1	0	0	0	SLAM+MEP,
1367	export_C6 HSC SC2_Vi0.csv	C6	SC2	Vi	HSC	HSC_SLAM	TT21	21	48	837	166170	132447	1.08569	610.119	174.618	213.044	39977.2	64.1466	74.6022	2922.01	275.27	212.781	142531	77574.9	3.57	545.789	4924.17	42544.3	10309.1	25738.8	248.952	0.341208	-4.70439	1	1	0	0	0	SLAM-HSC,
1368	export_C7 MPP SC3_CV1.csv	C7	SC3	CV	MPP	ckit-	TT21	21	48	838	120619	94145	7472.03	177.743	2175.14	865.978	5856.1	265.88	1173.18	157.98	133.657	158.153	133488	60390.1	73958.5	10897.7	3164.72	7793.43	1431.2	1215.76	3078.89	-3.59609	-0.483185	1	1	0	0	0	MPP,
1369	export_C7 MPP SC3_VC3.csv.1	C7	SC3	VC	MPP	MPP	TT21	21	48	839	115296	114701	1220.89	58.7396	1506.62	1920.99	3882.94	377.371	2101.29	950.266	426.099	74.5231	181321	126914	32836.9	10263.8	5319.74	28678.4	2276.95	4057.12	1865.54	-2.67925	-3.81017	1	4	0	0	0	SLAM+FLT3+,MPP,
1370	export_C7 MPP SC3_VC3.csv.2	C7	SC3	VC	MPP	SLAM+Flt3+	TT21	21	48	839	131097	109862	1228.52	251.364	1030.29	2235.69	4207.08	313.159	1973.93	765.553	270.919	90.8086	181321	126914	32836.9	10263.8	5319.74	28678.4	2276.95	4057.12	1865.54	-2.65036	-3.92041	2	4	0	0	0	SLAM+FLT3+,SLAM+FLT3+,MPP,
1371	export_C7 MPP SC3_VC3.csv.3	C7	SC3	VC	MPP	ckit-	TT21	21	48	839	138618	105127	1258.59	774.852	808.981	2609.49	4200.21	283.349	2236.8	1002.13	187.647	152.487	181321	126914	32836.9	10263.8	5319.74	28678.4	2276.95	4057.12	1865.54	-2.26655	-4.11779	2	4	0	0	0	SLAM+FLT3+,SLAM+FLT3+,SLAM+FLT3+,MPP,
1372	export_C7 MPP SC3_VC3.csv.4	C7	SC3	VC	MPP	ckit-	TT21	21	48	839	134128	108147	1164.57	530.082	688.384	1268.16	3786.44	303.724	1871.95	1519.59	179.068	152.851	181321	126914	32836.9	10263.8	5319.74	28678.4	2276.95	4057.12	1865.54	-2.22499	-4.16793	2	4	0	0	0	SLAM+FLT3+,SLAM+FLT3+,SLAM+FLT3+,MPP,
1373	export_C8 MPP SC3_CV4.csv	C8	SC3	CV	MPP	ckit-	TT21	21	48	840	77793.7	63089.3	1173.26	99.4839	85.5023	1576.14	768.744	57.2862	847.505	23.539	20.484	31.435	153144	96350.7	102323	1951.29	1792.04	9335.22	143.679	571.07	1120.51	-4.81843	4.05144	1	1	0	0	0	MyP,
1374	export_C8 MPP SC3_Vi3.csv.1	C8	SC3	Vi	MPP	SLAM+Flt3+	TT21	21	48	841	111305	69680	1.85085	439.019	364.07	447.557	4804.47	159.514	1421.75	2200.46	309.91	29.3212	184727	121115	10.71	1513.06	5072.9	41186	-100.471	17354.6	1300.21	-1.36282	-4.15413	1	3	0	0	0	SLAM+FLT3+,SLAM+FLT3+,
1375	export_C8 MPP SC3_Vi3.csv.2	C8	SC3	Vi	MPP	SLAM+Flt3+	TT21	21	48	841	110674	81799.7	1.90533	503.739	434.214	493.281	5222.1	271.636	1508.64	2026.83	209.555	81.0283	184727	121115	10.71	1513.06	5072.9	41186	-100.471	17354.6	1300.21	-1.50841	-4.24245	1	3	0	0	0	SLAM+FLT3+,SLAM+FLT3+,SLAM+FLT3+,
1376	export_C8 MPP SC3_Vi3.csv.3	C8	SC3	Vi	MPP	ckit-	TT21	21	48	841	97907.8	69576.9	1.92582	206.175	375.771	242.564	4960.87	113.705	1261.95	1773.09	198.585	177.932	184727	121115	10.71	1513.06	5072.9	41186	-100.471	17354.6	1300.21	-1.50369	-3.61702	1	3	0	0	0	SLAM+FLT3+,SLAM+FLT3+,SLAM+FLT3+,
1377	export_C9 ST-HSC SC3_VC3.csv.1	C9	SC3	VC	ST-HSC	HSC_ST	TT21	21	48	842	149855	112685	948.552	114.13	151.644	428.561	3941.31	544.576	4892.78	90.5129	302.455	65.3393	173995	106597	30352.1	3276.73	7265.5	30631.2	572.839	1330.18	228.211	-1.52968	2.39713	1	7	0	0	0	ST-HSC,ST-HSC,
1378	export_C9 ST-HSC SC3_VC3.csv.2	C9	SC3	VC	ST-HSC	HSC_ST	TT21	21	48	842	162371	136476	1013.18	119.426	189.133	572.317	4441.01	668.228	5204.01	96.3057	396.765	86.727	173995	106597	30352.1	3276.73	7265.5	30631.2	572.839	1330.18	228.211	-2.47702	2.09241	1	7	0	0	0	MEP,ST-HSC,ST-HSC,
1379	export_C9 ST-HSC SC3_VC3.csv.3	C9	SC3	VC	ST-HSC	ckit+SCA1-	TT21	21	48	842	132373	103626	960.666	87.9175	138.22	264.993	4155.02	565.384	4399.54	-2.85674	376.618	168.023	173995	106597	30352.1	3276.73	7265.5	30631.2	572.839	1330.18	228.211	-0.908009	3.80764	2	7	0	0	0	GMP,MEP,ST-HSC,ST-HSC,
1380	export_C9 ST-HSC SC3_VC4.csv.1	C9	SC3	VC	ST-HSC	ckit+SCA1-	TT21	21	48	842	128557	55905.3	502.829	101.934	183.682	376.707	2267.97	324.327	2955.13	-2.1218	266.506	37.8736	173995	106597	30352.1	3276.73	7265.5	30631.2	572.839	1330.18	228.211	-1.3629	4.00748	3	7	0	0	0	GMP,GMP,MEP,ST-HSC,ST-HSC,
1381	export_C9 ST-HSC SC3_VC4.csv.2	C9	SC3	VC	ST-HSC	ckit+SCA1-	TT21	21	48	842	135509	58871.1	529.881	89.9746	146.15	321.093	2307.59	337.32	3229.7	-12.5008	297.116	162.834	173995	106597	30352.1	3276.73	7265.5	30631.2	572.839	1330.18	228.211	-1.26568	3.9428	3	7	0	0	0	GMP,GMP,GMP,MEP,ST-HSC,ST-HSC,
1382	export_C9 ST-HSC SC3_VC4.csv.3	C9	SC3	VC	ST-HSC	ckit-	TT21	21	48	842	139537	68632.5	548.38	117.055	125.995	324.623	2591.98	519.776	4853.1	-44.1455	173.08	176.873	173995	106597	30352.1	3276.73	7265.5	30631.2	572.839	1330.18	228.211	-1.48402	4.14747	3	7	0	0	0	GMP,GMP,GMP,GMP,MEP,ST-HSC,ST-HSC,
1383	export_C9 ST-HSC SC3_VC4.csv.4	C9	SC3	VC	ST-HSC	ckit-	TT21	21	48	842	161251	82243.6	504.394	102.752	139.228	307.77	2271.13	551.241	4720.79	-24.9689	192.091	189.881	173995	106597	30352.1	3276.73	7265.5	30631.2	572.839	1330.18	228.211	-1.48646	4.13243	3	7	0	0	0	GMP,GMP,GMP,GMP,MEP,ST-HSC,ST-HSC,
1384	export_D1 MPP SC2_CF1.csv.1	D1	SC2	CF	MPP	MPP	TT21	21	48	843	125034	73626	12488.1	27.916	815.411	580.446	194.095	189.652	572.735	135.718	680.815	141.982	151408	116124	142514	11579.2	4819.54	-7.01055	-621.897	2525.54	1863.64	-3.63738	0.171266	1	2	0	0	0	MPP,MPP,
1385	export_D1 MPP SC2_CF1.csv.2	D1	SC2	CF	MPP	MPP	TT21	21	48	843	110874	76347.4	12721.1	129.614	895.717	693.036	248.86	116.907	668.341	194.75	791.389	170.495	151408	116124	142514	11579.2	4819.54	-7.01055	-621.897	2525.54	1863.64	-3.79645	-0.163938	1	2	0	0	0	MPP,MPP,
1386	export_D1 MPP SC2_VC1.csv.1	D1	SC2	VC	MPP	ckit+SCA1-	TT21	21	48	844	124296	76940.2	2976.12	82.8774	737.229	702.019	11176.2	239.981	905.52	69.9702	422.151	3.63266	177360	107370	35191.9	13132	5752.09	25740.8	-611.887	903.108	752.556	-3.3925	0.73672	1	2	0	0	0	GMP,GMP,
1387	export_D1 MPP SC2_VC1.csv.2	D1	SC2	VC	MPP	ckit+SCA1-	TT21	21	48	844	129244	107597	3072.88	103.069	395.825	605.029	11750.6	357.486	1448.53	30.8921	445.309	86.2963	177360	107370	35191.9	13132	5752.09	25740.8	-611.887	903.108	752.556	-3.22567	1.18553	1	2	0	0	0	GMP,GMP,
1388	export_D10 ST-HSC SC3_CF2.csv	D10	SC3	CF	ST-HSC	HSC_ST	TT21	21	48	845	141509	114415	6580.3	158.778	169.106	364.892	132.053	18.9203	244.819	5727.89	233.721	50.7796	159772	104077	112237	323.298	3805.83	-21.382	-238.249	16426.2	-96.5223	-0.584156	-3.73005	1	1	0	0	0	ST-HSC,
1389	export_D10 ST-HSC SC3_Vi3.csv	D10	SC3	Vi	ST-HSC	SLAM+Flt3+	TT21	21	48	846	83129.3	75832.1	7.90443	6467.78	344.379	210422	5104.87	80169	-2666.26	1168.67	1856.67	64.065	133975	162818	1.19	519.072	2608.51	48218.7	841.075	508.184	61.3059	-5.50046	-5.94925	1	1	0	0	0	SLAM+FLT3+,
1390	export_D11 HSC SC3_CV2.csv.1	D11	SC3	CV	HSC	HSC_ST	TT21	21	48	847	91609.4	63211.8	3518.81	171.415	89.2568	76.4145	2448.11	91.2279	93.7815	309.378	469.006	42.4586	173918	113126	107055	-77.419	9815.24	12360.6	7017.06	9250.88	243.296	0.642724	-0.182266	1	4	0	0	0	ST-HSC,ST-HSC,
1391	export_D11 HSC SC3_CV2.csv.2	D11	SC3	CV	HSC	HSC_ST	TT21	21	48	847	112942	68574	3147.78	175.97	69.7754	102.632	2133.82	86.7278	90.6629	202.821	324.015	104.413	173918	113126	107055	-77.419	9815.24	12360.6	7017.06	9250.88	243.296	1.04077	0.252277	1	4	0	0	0	ST-HSC,ST-HSC,ST-HSC,
1392	export_D11 HSC SC3_CV2.csv.3	D11	SC3	CV	HSC	HSC_ST	TT21	21	48	847	108613	59608.2	3459.39	104.464	70.7308	113.563	2459.82	70.8842	103.946	276.528	433.56	181.159	173918	113126	107055	-77.419	9815.24	12360.6	7017.06	9250.88	243.296	0.219709	0.0094049	1	4	0	0	0	SLAM-HSC,ST-HSC,ST-HSC,ST-HSC,
1393	export_D11 HSC SC3_CV2.csv.4	D11	SC3	CV	HSC	HSC_ST	TT21	21	48	847	82232.6	66995.5	3752.44	215.317	84.3787	99.8114	2453.23	94.0965	336.954	173.869	336.113	221.046	173918	113126	107055	-77.419	9815.24	12360.6	7017.06	9250.88	243.296	1.35683	0.186095	2	4	0	0	0	SLAM-HSC,ST-HSC,ST-HSC,ST-HSC,
1394	export_D11 HSC SC3_VC3.csv.1	D11	SC3	VC	HSC	ckit+SCA1-	TT21	21	48	848	145725	103313	1035.33	270.56	117.91	66.1306	4413.83	149.321	315.188	3.07179	425.372	62.017	159826	89310.7	29884.5	262.233	7752.4	30278.5	17270.7	709.196	86.7313	2.50225	2.80696	1	4	0	0	0	SLAM+MEP,SLAM+MEP,
1395	export_D11 HSC SC3_VC3.csv.2	D11	SC3	VC	HSC	ckit+SCA1-	TT21	21	48	848	145166	102970	989.16	1428.97	119.244	126.828	4323.29	196.304	102.64	26.4829	208.376	102.768	159826	89310.7	29884.5	262.233	7752.4	30278.5	17270.7	709.196	86.7313	5.56505	0.519286	1	4	0	0	0	SLAM+MEP,SLAM+MEP,SLAM+MEP,
1396	export_D11 HSC SC3_VC3.csv.3	D11	SC3	VC	HSC	ckit+SCA1-	TT21	21	48	848	114379	78476	1072.42	222.256	93.4265	76.023	4539.71	191.374	225.874	12.8298	520.149	202.617	159826	89310.7	29884.5	262.233	7752.4	30278.5	17270.7	709.196	86.7313	2.21033	2.96304	1	4	0	0	0	SLAM+MEP,SLAM+MEP,SLAM+MEP,SLAM+MEP,
1397	export_D11 HSC SC3_VC3.csv.4	D11	SC3	VC	HSC	ckit+SCA1-	TT21	21	48	848	114977	93680.5	993.423	349.54	86.972	113.307	3970.91	56.9985	205.289	-22.2676	359.284	221.463	159826	89310.7	29884.5	262.233	7752.4	30278.5	17270.7	709.196	86.7313	2.9193	2.61758	1	4	0	0	0	SLAM+MEP,SLAM+MEP,SLAM+MEP,SLAM+MEP,
1398	export_D12 HSC SC3_CF2.csv	D12	SC3	CF	HSC	ckit-	TT21	21	48	849	146879	105272	5385.62	3100.26	75.3597	195.157	136.571	246.789	406.09	28.2972	149.963	208.849	191627	123447	114921	1893.76	6510.2	-28.6782	5168.94	4176.6	381.378	5.35245	-0.0502394	1	1	0	0	0	ckit-,
1399	export_D12 HSC SC3_CV1.csv.1	D12	SC3	CV	HSC	HSC_ST	TT21	21	48	850	128027	80227.3	7825.06	206.551	90.3112	266.733	6087.83	-72.441	63.0936	7611.19	290.523	197.452	149493	79763.3	53056.2	2019.06	3309.31	8162.14	3380.7	33150.5	158.615	-0.506188	-3.84967	1	2	0	0	0	ST-HSC,SLAM-HSC,
1400	export_D12 HSC SC3_CV1.csv.2	D12	SC3	CV	HSC	HSC_ST	TT21	21	48	850	115100	79887.1	7019.17	170.351	208.758	395.419	5368.88	-85.1951	103.604	7860.02	323.231	214.406	149493	79763.3	53056.2	2019.06	3309.31	8162.14	3380.7	33150.5	158.615	-0.588251	-3.80542	2	2	0	0	0	ST-HSC,SLAM-HSC,
1401	export_D12 HSC SC3_VC3.csv.1	D12	SC3	VC	HSC	HSC_SLAM	TT21	21	48	851	143431	70710.4	866.5	602.732	86.9959	74.6234	3341.94	128.586	71.9365	229.931	236.164	14.1126	145765	69557.9	20462.1	730.87	6850.09	22437.1	4746.98	2480.59	87.6608	2.99765	-0.796557	1	4	0	0	0	ST-HSC,SLAM-HSC,
1402	export_D12 HSC SC3_VC3.csv.2	D12	SC3	VC	HSC	ckit-	TT21	21	48	851	127429	94665.8	858.532	125.824	97.7118	90.9733	3183.21	106.945	129.163	116.583	152.275	26.4828	145765	69557.9	20462.1	730.87	6850.09	22437.1	4746.98	2480.59	87.6608	1.12709	1.77115	2	4	0	0	0	SLAM-HSC,ST-HSC,SLAM-HSC,
1403	export_D12 HSC SC3_VC3.csv.3	D12	SC3	VC	HSC	ckit-	TT21	21	48	851	134475	108277	831.668	459.563	102.158	111.492	3081.23	158.169	144.111	288.713	191.332	83.2271	145765	69557.9	20462.1	730.87	6850.09	22437.1	4746.98	2480.59	87.6608	2.56125	-0.798576	3	4	0	0	0	SLAM-HSC,SLAM-HSC,ST-HSC,SLAM-HSC,
1404	export_D12 HSC SC3_VC3.csv.4	D12	SC3	VC	HSC	HSC_SLAM	TT21	21	48	851	121891	72486.1	869.934	610.108	83.0973	73.592	3375.79	140.078	88.049	239.578	253.046	84.5414	145765	69557.9	20462.1	730.87	6850.09	22437.1	4746.98	2480.59	87.6608	3.07102	-0.867609	3	4	0	0	0	SLAM-HSC,SLAM-HSC,ST-HSC,SLAM-HSC,
1405	export_D12 HSC SC3_Vi3.csv.1	D12	SC3	Vi	HSC	ckit+SCA1-	TT21	21	48	852	105228	60318.3	1.42513	290.356	132.554	85.1182	3838.78	153.781	63.7108	9.19177	263.397	130.336	137390	93075.9	1.19	-18.7372	7358.65	35998.7	3577.99	763.6	-19.4364	3.43653	2.73377	1	4	0	0	0	ckit-,SLAM+MEP,
1406	export_D12 HSC SC3_Vi3.csv.2	D12	SC3	Vi	HSC	ckit-	TT21	21	48	852	125155	73162.9	1.29691	496.59	74.6675	89.5022	4024.52	106.611	81.5795	17.307	99.1431	146.337	137390	93075.9	1.19	-18.7372	7358.65	35998.7	3577.99	763.6	-19.4364	4.97215	2.36156	2	4	0	0	0	SLAM+MEP,ckit-,SLAM+MEP,
1407	export_D12 HSC SC3_Vi3.csv.3	D12	SC3	Vi	HSC	ckit+SCA1-	TT21	21	48	852	100376	54654.5	1.46147	460.503	112.874	119.022	3968.05	170.861	63.5116	26.1079	275.999	206.341	137390	93075.9	1.19	-18.7372	7358.65	35998.7	3577.99	763.6	-19.4364	4.03413	1.843	3	4	0	0	0	ckit-,SLAM+MEP,ckit-,SLAM+MEP,
1408	export_D12 HSC SC3_Vi3.csv.4	D12	SC3	Vi	HSC	ckit-	TT21	21	48	852	135037	72690.8	1.31302	564.239	64.4171	98.8455	4378.34	105.854	97.8252	2.49368	126.469	224.599	137390	93075.9	1.19	-18.7372	7358.65	35998.7	3577.99	763.6	-19.4364	5.04416	2.27268	4	4	0	0	0	ckit-,SLAM+MEP,ckit-,SLAM+MEP,
1409	export_D2 MPP SC2_CF2.csv.1	D2	SC2	CF	MPP	ckit+SCA1-	TT21	21	48	853	129607	81637.2	6059.04	58.1142	478.871	756.983	88.3054	187.009	665.421	34.9481	459.882	16.2776	171395	109623	131301	6016.43	6941.42	-16.2806	-275.839	2676.45	958.936	-3.32712	1.16323	1	2	0	0	0	MEP,GMP,
1410	export_D2 MPP SC2_CF2.csv.2	D2	SC2	CF	MPP	ckit+SCA1-	TT21	21	48	853	122525	110653	6350.14	152.768	577.567	250.793	77.9497	226.134	922.649	-17.3224	574.385	171.819	171395	109623	131301	6016.43	6941.42	-16.2806	-275.839	2676.45	958.936	-3.03287	0.670189	2	2	0	0	0	MEP,GMP,
1411	export_D3 ST-HSC SC2_CF3.csv	D3	SC2	CF	ST-HSC	ckit+SCA1-	TT21	21	48	854	94059	69983.2	2923.41	107.645	112.279	1872.34	75.3492	219.704	916.596	-16.7425	397.134	44.5717	172457	112672	102727	14902	5806.14	33.409	-254.788	3074.95	577.181	-3.76329	3.42507	1	1	0	0	0	GMP,
1412	export_D3 ST-HSC SC2_VC1.csv	D3	SC2	VC	ST-HSC	HSC_ST	TT21	21	48	855	155115	94167.8	3203.23	69.6881	160.228	130.923	10551.9	196.11	122.147	325.092	467.762	120.783	133052	74213.2	23754.8	121.382	4623.63	19389.4	1364.18	9972.54	263.269	-0.672568	-0.219974	1	2	0	0	0	MyP,ST-HSC,
1413	export_D3 ST-HSC SC2_VC5.csv	D3	SC2	VC	ST-HSC	ckit-	TT21	21	48	855	76072.7	46630	445.168	197083	18341	7684.84	1031.06	49685.2	-3853.07	29708	-372.199	45.7059	133052	74213.2	23754.8	121.382	4623.63	19389.4	1364.18	9972.54	263.269	-1.39326	-5.26981	2	2	0	0	0	MyP,ST-HSC,
1414	export_D3 ST-HSC SC2_Vi2.csv.1	D3	SC2	Vi	ST-HSC	ckit+SCA1-	TT21	21	48	856	142938	76469.4	1.8276	66.7612	224.519	159.798	7987.27	156.831	728.897	31.3912	384.236	9.18933	172603	111784	1.19	1744.91	3964.19	34741.4	1629.91	11317.9	288.243	-0.323216	3.17674	1	4	0	0	0	MPP,MEP,
1415	export_D3 ST-HSC SC2_Vi2.csv.2	D3	SC2	Vi	ST-HSC	MPP	TT21	21	48	856	131741	76633.1	1.71185	35.334	329.819	180.539	8131.81	156.121	270.515	83.8884	729.451	60.7735	172603	111784	1.19	1744.91	3964.19	34741.4	1629.91	11317.9	288.243	-2.5232	0.47835	2	4	0	0	0	MPP,MPP,MEP,
1416	export_D3 ST-HSC SC2_Vi2.csv.3	D3	SC2	Vi	ST-HSC	MPP	TT21	21	48	856	110518	79440.9	1.67721	54.3461	454.499	137.485	8920.09	141.548	391.342	121.953	510.22	137.773	172603	111784	1.19	1744.91	3964.19	34741.4	1629.91	11317.9	288.243	-2.43113	0.168392	2	4	0	0	0	MPP,MPP,MPP,MEP,
1417	export_D3 ST-HSC SC2_Vi2.csv.4	D3	SC2	Vi	ST-HSC	MPP	TT21	21	48	856	126030	100960	5.59266	58.1404	277.841	308.393	8463.91	157.429	636.47	151.915	330.553	169.159	172603	111784	1.19	1744.91	3964.19	34741.4	1629.91	11317.9	288.243	-2.19037	0.944189	2	4	0	0	0	MPP,MPP,MPP,MEP,
1418	export_D4 ST-HSC SC2_CF2.csv.1	D4	SC2	CF	ST-HSC	ckit+SCA1-	TT21	21	48	857	114251	87118	4957.97	28.8448	215.428	381.943	94.1637	250.77	1902.9	57.0626	578.11	134.855	142387	88731.2	98054.8	5065.21	5713.55	-9.76514	-1445.48	1134.49	357.065	-1.66857	2.87925	1	2	0	0	0	MPP,GMP,
1419	export_D4 ST-HSC SC2_CF2.csv.2	D4	SC2	CF	ST-HSC	MPP	TT21	21	48	857	91205	93560.3	4813.18	72.8174	307.779	223.999	113.659	299.09	1826.71	96.0327	421.95	145.738	142387	88731.2	98054.8	5065.21	5713.55	-9.76514	-1445.48	1134.49	357.065	-2.41763	0.640267	2	2	0	0	0	MPP,GMP,
1420	export_D4 ST-HSC SC2_Vi1.csv.1	D4	SC2	Vi	ST-HSC	ckit+SCA1-	TT21	21	48	858	111940	69057.9	5.18478	73.6253	110.335	184.895	20507.8	57.4081	639.401	36.6335	410.564	56.3456	130301	74679.6	-15.47	230.809	7351.36	39877.3	1373.78	2271.92	137.102	-0.233084	3.27551	1	2	0	0	0	MEP,MEP,
1421	export_D4 ST-HSC SC2_Vi1.csv.2	D4	SC2	Vi	ST-HSC	ckit+SCA1-	TT21	21	48	858	114373	62513	1.65499	90.4267	95.1753	118.603	18030.3	172.835	692.494	-3.05882	404.031	212.265	130301	74679.6	-15.47	230.809	7351.36	39877.3	1373.78	2271.92	137.102	0.495536	3.4857	1	2	0	0	0	MEP,MEP,
1422	export_D5 HSC SC2_CV0.csv	D5	SC2	CV	HSC	ckit-	TT21	21	48	859	134310	68811.6	14135.1	457.876	142.079	256.814	9445.62	-84.5779	40.6892	2818.11	185.098	128.351	130117	70181.4	46824.1	300.43	2378.85	6860.22	8103.64	16905.6	-46.04	0.357848	-4.57115	1	1	0	0	0	SLAM-HSC,
1423	export_D6 HSC SC2_CV0.csv	D6	SC2	CV	HSC	HSC_SLAM	TT21	21	48	860	178290	156665	23536.5	2693.31	180.936	251.504	20616.9	120.748	111.181	808.914	323.39	206.459	174580	119721	112861	552.924	7552.5	16153.6	23383.4	12331.5	188.57	3.0856	-2.7621	1	1	0	0	0	SLAM-HSC,
1424	export_D6 HSC SC2_VC1.csv.1	D6	SC2	VC	HSC	ckit+SCA1-	TT21	21	48	861	115858	91850.9	2796.86	213.184	93.7568	54.508	11753.9	161.801	89.6964	-1.07046	450.553	35.2163	142900	64444.5	21793.7	2836.95	5136.6	19206	4894.52	2654.52	58.8632	2.10143	3.08431	1	2	0	0	0	MEP,SLAM+MEP,
[truncated: 178 more rows]
