# Supplementary material for: HSPCs display within-family homogeneity in differentiation and proliferation despite population heterogeneity
Source: eLife journal article supplement (doi:10.7554/elife.60624), 2021-05-18
Supplement: supp [file Gating_matrix.xlsx]

## Sheet: Sheet1
	TT22_24h	TT22_48h	TT23_24h	TT21_24h	TT21_48h
CD48	-1	-1	-1	-1	-1
SLAM	400	300	300	250	200
SLAM_for_sca1-	200	200	300	250	200
Flt3	400	250	500	500	250
SCA-1	150	100	200	100	80
ckit_1	100	100	100	100	100
ckit_2	150	150	150	150	150
CD16/32_2	300	300	350	500	300
